# Supplementary material for: Species From Feces: Order-Wide Identification of Chiroptera From Guano and Other Non-Invasive Genetic Samples
Source: PubMed Central journal article supplement (PMC5031397; doi:10.1371/journal.pone.0162342), 2016-09-21
Supplement: pone.0162342.s004.pdf [file pone.0162342.s004.pdf]

**S1 Protocol. PCR conditions for bat barcoding primers BEGLCOIf and BEGLCOIr (580BP).** Barcode amplification reactions included 0.5-2 ng DNA in a 25  $\mu$ L volume. For low quality DNA samples deriving from buccal, fecal, or wing punch sources, DNA was added undiluted. The reaction included 1  $\mu$ L 10X Mg-free PCR buffer (Invitrogen), 2 mM MgCl<sub>2</sub>, 20 ng BSA, 0.2 mM of each dNTP, 0.4  $\mu$ M unlabeled primers, and 0.05 (tissue) - 0.1 (feces) U/  $\mu$ L PlatinumTaq DNA polymerase (Invitrogen). Amplification was carried out on a PTC-200 thermocycler under the following conditions: 95°C for 10 minutes followed by 33 cycles of 95°C for 30s, 59°C for 30s, and 72°C for 1 min, with a final extension step at 72°C for 10 min. Products were purified using ExoSAP-IT (Affymetrix), cycle-sequenced using BigDye Terminator v3.1 (manufacturer instructions), and sequenced on an ABI3130 Genetic Analyzer (applied Biosystems). Sequences were then visualized and processed using Sequencher 5.3 software.
