# Supplementary material for: Species From Feces: Order-Wide Identification of Chiroptera From Guano and Other Non-Invasive Genetic Samples
Source: PubMed Central journal article supplement (PMC5031397; doi:10.1371/journal.pone.0162342), 2016-09-21
Supplement: pone.0162342.s005.pdf [file pone.0162342.s005.pdf]

**S1 Table. *In silico* performance of bat-specific DNA mini-barcode primer pairs against all publically accessible Chiroptera COI barcode sequences.** In order to compare the potential of primers developed in current study to those previously utilized, we harvested sequences from the Barcode of Life Data Systems ([www.barcodinglife.org](http://www.barcodinglife.org)) without applying the strict taxonomic parameters used for primer design, dereplicated them at full length using USEARCH (derep\_fulllength), and then clustered to 100% similarity (cluster\_fast) to alleviate sequence overrepresentation. All tested primers were run through Primer Prospector's analyze\_primers.py script against all unaligned sequences using default parameters, which allows for some primer mismatch. We then generated *in silico* amplicons (get\_amplicon\_and\_reads.py), and visually inspected and removed all amplicon files for long N-characters and appropriate size. The total number of sequences for bats is in parentheses, with the number of hits for each primer pair below.

| Primer   | Author              | Comparable <i>in silico</i> ? | Bat sequences (10523) |
|----------|---------------------|-------------------------------|-----------------------|
| VF1      | Ivanova et al. 2006 | No*                           | 38                    |
| BC1R     | Ivanova et al. 2012 | Yes                           | 1182                  |
| BC2F     | Ivanova et al. 2012 | Yes                           | 805                   |
| BC2R     | Ivanova et al. 2012 | Yes                           | 0                     |
| BC3F     | Ivanova et al. 2012 | Yes                           | 0                     |
| BC3R     | Ivanova et al. 2012 | Yes                           | 0                     |
| BC4F     | Ivanova et al. 2012 | Yes                           | 0                     |
| BC4R     | Ivanova et al. 2012 | Yes                           | 0                     |
| BC5F     | Ivanova et al. 2012 | Yes                           | 0                     |
| BC5R     | Ivanova et al. 2012 | Yes                           | 0                     |
| BC6F     | Ivanova et al. 2012 | No*                           | 5                     |
| VR1      | Ward et al. 2005    | No*                           | 5                     |
| SFF_145f | Walker et al. 2016  | Yes                           | 6088                  |
| SFF_351r | Walker et al. 2016  | Yes                           | 6088                  |
| SFF_145f | Walker et al. 2016  | Yes                           | 6988                  |
| SFF_492r | Walker et al. 2016  | Yes                           | 6988                  |
| SFF_210f | Walker et al. 2016  | Yes                           | 5726                  |
| SFF_492r | Walker et al. 2016  | Yes                           | 5726                  |
| SFF_348f | Walker et al. 2016  | Yes                           | 4958                  |
| SFF_492r | Walker et al. 2016  | Yes                           | 4958                  |
| SFF_210f | Walker et al. 2016  | Yes                           | 5124                  |
| SFF_351r | Walker et al. 2016  | Yes                           | 5124                  |
| SFF_145f | Walker et al. 2016  | Yes                           | 9126                  |
| SFF_348r | Walker et al. 2016  | Yes                           | 9126                  |
| SFF_210f | Walker et al. 2016  | Yes                           | 5124                  |
| SFF_348r | Walker et al. 2016  | Yes                           | 5124                  |
| SFF_351f | Walker et al. 2016  | Yes                           | 5759                  |
| SFF_492r | Walker et al. 2016  | Yes                           | 5759                  |
| BEGLCOf  | Walker et al. 2016  | Yes                           | 7618                  |
| BEGLCOr  | Walker et al. 2016  | Yes                           | 7618                  |

\*Primers hybridize outside of the standard barcode region, and thus are not strictly comparable using the downloaded sequence dataset.
