# Supplementary material for: Species From Feces: Order-Wide Identification of Chiroptera From Guano and Other Non-Invasive Genetic Samples
Source: PubMed Central journal article supplement (PMC5031397; doi:10.1371/journal.pone.0162342), 2016-09-21
Supplement: pone.0162342.s006.pdf [file pone.0162342.s006.pdf]

**S2 Table. *In vitro* comparison of bat-specific DNA mini-barcode primer pairs (products <300BP) for use with fecal DNA.** PCR amplification adhered to the conditions outlined in the respective primer publications. All tests were assessed by amplification performance to Sanger sequencing as well as ability to identify species-level taxonomy using common DNA alignment-based identifiers. DNA was isolated from eight singular fecal pellets and one tissue sample for a test panel that included five bat species of two families. Species tested were *Eptesicus fuscus* (one fresh fecal pellet and four at room temperature for three months), *Myotis auricolus*, *Corynorhinus townsendii*, *Tadarida brasiliensis*, and *Euderma maculatum* (internal tissue). The total number of samples are in parentheses.

| Primer   | Author              | Amplification (of 9) | Sequencing (of 9) | BLAST ID (species-level) | BOLD ID | Performance (%) |
|----------|---------------------|----------------------|-------------------|--------------------------|---------|-----------------|
| VF1      | Ivanova et al. 2006 | 3                    | 0                 | NA                       | NA      | NA              |
| BC1R     | Ivanova et al. 2012 |                      |                   |                          |         |                 |
| BC2F     | Ivanova et al. 2012 | 0                    | NA                | NA                       | NA      | NA              |
| BC2R     | Ivanova et al. 2012 |                      |                   |                          |         |                 |
| BC3F     | Ivanova et al. 2012 | 0                    | NA                | NA                       | NA      | NA              |
| BC3R     | Ivanova et al. 2012 |                      |                   |                          |         |                 |
| BC4F     | Ivanova et al. 2012 | 4                    | 0                 | NA                       | NA      | NA              |
| BC4R     | Ivanova et al. 2012 |                      |                   |                          |         |                 |
| BC5F     | Ivanova et al. 2012 | 0                    | NA                | NA                       | NA      | NA              |
| BC5R     | Ivanova et al. 2012 |                      |                   |                          |         |                 |
| BC6F     | Ivanova et al. 2012 | 8                    | 8                 | 7**                      | 0**     | 78%             |
| VR1      | Ward et al. 2005    |                      |                   |                          |         |                 |
| SFF_145f | Walker et al. 2016  | 9                    | 9                 | 9                        | 9       | 100%            |
| SFF_351r | Walker et al. 2016  |                      |                   |                          |         |                 |

\*\* Mini-barcode marker had insufficient resolution to yield credible matches for alignment-based identification.
