# Supplementary material for: Species From Feces: Order-Wide Identification of Chiroptera From Guano and Other Non-Invasive Genetic Samples
Source: PLoS One. 2016 Sep 21;11(9):e0162342. doi: 10.1371/journal.pone.0162342 (PMC5031397; doi:10.1371/journal.pone.0162342)
Supplement: S3 FASTA — (FASTA) [file pone.0162342.s003.fasta]

>GMGSJ754-13|Trombidiformes|COI-5P
TACTTTATACTTTATTTTTGGGTTTTGGTCAGGATTATTAGGAGCTTCTATAAGAATTATTATTCGTATAAAGTTAGCTA
ATCCTGGTTTTATAGGCCAAAATGATCAAATTTATAATGTTATAGTTACAGCTCATGCTTTTATTATAATTTTTTTTATA
GTAATACCTATTATAATTGGAGGCTTTGGAAATTGATTGGTTCCTGTAATAATTGGAGCCCCAGATATAGCTTTCCCTCG
AATAAATAATATAAGTTTTTGATTATTACCTCCTGCTTTAATAATATTATTATTATCTTCTGTATCAGAAAGAGGAGCTG
GAACTGGATGAACTGTTTATCCCCCATTATCAAATTATTTATATCATGGTGGAATTTCAGTTGATTTAACAATTTTTTCT
CTTCATATAGCTGGAATTTCTTCAATTTTAGGAGCAATTAATTTTATCACAACTATTTTAAATATGCGTATGAAATTAGT
TTCTTTTGAGCGGCTTCCATTGTTTGTTTGATCAGTATTAATTACAGCAGTATTGTTATTACTTTCTTTACCAGTTTTAG
CAGGAGCTATCACTATATTATTAACTGATCGAAATTATAATACATCTTTTTTTGATCCAGCAGGAGGGGGAGATCCT
>GBCH5687-13|Dermanyssusgallinae|COI-5P|FM208713
TTTAATTTTCATAGTGGGGTTAGGGTAGATTTGACTATTTTTAGACTCCATTTGGCTGGAATTTCTTCTATTCTTGGAGC
GATTAATTTTATTACTACAATTATTAATATACGACCTAAATCAATATCATTGGAAATAATACCTCTCTTTCCATGGTCTA
TTTTAATTACTGCAATTTTATTACTTTTATCTCTGCCAGTTCTTGCAGGTGCAATTACTATACTATTATTTGATCGTAAT
TTTAATACAACTTTTTTTGATCCTAGAGGAGGGGGAGATCCTATTTTATACCAACATTTATTTTGATTTTTTGGACATCC
CGAAGTTTATATTTTAATTATCCCAGGATTCGGAATAATTTCCCATATTGTTTGTTATCAAACTGGAAAAAAGAAACCTT
TTGGAAATATTAGAATAATCTATGCGATATTAACAATTGGTATTTTAGGATTTATTGTTTGAGCCCATCATATATTTACA
ATTGGATTAGATATTGATACTCGAGCTTATTTTACTGCCGCCACAATGATTATTGCAATTCCAACAGGAATTAAGATT
>GENHP041-11|Araneae|COI-5P
AACTTTATATTTATTGTTTGGAGCTTGGGCTGCTATAGTAGGTACAGCTATAAGAGTTTTAATTCGAATTGAGTTGGGGC
AAACTGGGAGATTTTTAGGTGACGATCAATTATATAATGTAATTGTAACAGCTCATGCATTTGTAATAATTTTTTTTATA
GTTATACCTATTTTAATTGGAGGTTTTGGGAATTGGTTAGTTCCTTTAATATTAGGAGCTCCTGATATGGCTTTTCCTCG
AATAAATAATTTAAGTTTTTGATTACTACCTCCTTCATTAATATTATTATTTGTTTCTTCAATAGTAGAAATAGGAGTAG
GAGCTGGGTGGACAGTTTACCCTCCTTTATCTTCTTTGGAAGGACATGCTGGTAGATCTGTAGATTTTGCTATTTTTTCT
TTACATTTAGCTGGTGCTTCATCTATTATAGGAGCTATTAATTTTATTTCTACTATTTTAAATATACGTTCTTTTGGAAT
AAGAATAGAAAAGGTTTCTCTTTTTGTCTGATCTGTTCTTATTACTGCTGTTTTATTGTTACTTTCTTTACCTGTATTAG
CAGGAGCTATTACTATATTATTGACGGATCGAAATTTTAATACTTCATTTTTTGATCCTGCGGGGGGAGGAGATCCTATT
TTATTTCAACATTTATTT
>CNPAL555-13|Mesostigmata|COI-5P
ACTATATATTTAGGATTAAGAGCTTGATCTGGAATATTAGGAACAGCTTTAAGAGTACTTATTCGTACTGAATTAGGACA
ACCAGGTCATACCATTGGCGATGATCAAATTTTTAATGTAATTGTAACAGCTCATGCTTTCATCATAATTTTTTTTATAG
TTATACCAGCAATAGTTGGAGGTTTTGGTAATTGATTAGTTCCATTAATAATTGGAGCTCCAGATATAGCTTTTCCACGC
ATAAATAATATAAGATTCTGACTTTTACCCCCTTCTTTACTTCTTTTAATTTCTTCCTCTATAGTAGAATCTGGTGCAGG
AACAGGATGAACTGTCTATCCCCCATTAGCTTCTAATATCTCTCATAATGGAGGAAGAGTAGACTTAGCTATTTTTTCTT
TACATTTAGCTGGTTTATCCTCTATTTTAGGATCAATTAACTTTATTACTACAATTTGTAACATACGTTCATATAGTATA
ACTATAGATCAAATACCTTTATTTGTTTGATCTATTTTATTAACTACTATTCTTCTATTACTCTCTCTTCCTGTTCTAGC
AGGAGCTATTACTATACTATTAACAGACCGA
>SSBAB1525-12|Araneae|COI-5P
AACTTTATATTTTATTTTTGGAGCTTGAGCCGCTATAGTGGGAACTGCAATAAGAGTATTGATTCGAATTGAGTTAGGAC
AAACTGGGAGTATATTGGGGGATGATCAGTTGTATAATGTAATTGTTACTGCTCATGCTTTTGTTATAATTTTTTTTATA
GTTATACCAATTTTAATTGGAGGGTTTGGAAATTGGTTAGTCCCATTGATACTTGGGGCTCCTGATATAGCTTTCCCACG
AATAAACAATCTAAGATTTTGGTTGTTACCTCCTTCTTTATTATTGTTATTTATTTCAAGAATAGTAGAGATAGGAGTTG
GAGCTGGATGAACAGTTTATCCCCCTCTAGCTTCTTTAGAAGGTCATGCCGGAAGCTCTGTAGATTTTGCTATTTTTTCT
CTTCATTTAGCTGGGGCTTCTTCAATTATAGGAGCAATTAATTTTATTTCTACTATTGTAAATATACGGGGGAATGGTGT
TTCTATAGAAAAAGTACCATTATTTGTTTGGTCTGTTTTAATTACTGCTGTTTTATTACTATTATCTTTACCTGTGTTAG
CAGGTGCTATTACGATGCTCTTGACTGATCGAAATTTTAATACTTCTTTTTTTGATCCTGCGGGAGGGGGAGATCCTGTG
TTATTTCAACATTTATTT
>MYMCD152-11|Diapterobateshumeralis|COI-5P|JX838344
AACTCTTTACTTTATTTTTGGAGCGTGAGCTGGCTTACTAGGATCTGCTCTTAGAGGCCTAATTCGGTTAGAGTTAGGTC
AACCCGGCTCTCTCATAGAAAACGATCAAATCTATAACACTATTGTAACTGCTCATGCTTTTGTAATAATTTTCTTTATA
GTTATACCTGTGATAATTGGAGGCTTCGGAAACTGGCTTGTACCAATAATGATTGGAGCCCAAGACATGGCTTTTCCTCG
TATAAATAACATAAGATTCTGACTCTTGCCACCTTCTTTAGCACTTTTGTCTTCTTCAGCTTTTGCTGGGATAGGAGCCG
GGACAGGTTGGACAGTCTATCCTCCTTTAGCAGGAAACCTTTTCCATTCAGGATTCGCTGTGGATCTTGCCATTTTCAGC
CTTCATTTAGCAGGAGCCTCCTCTATTTTAGGTGCTATCAATTTTATCACAACAATCTTAAACATGCGTTCTTCGTCCAT
GACGTTAGACTCAATCCCCTTATTCGTCTGATCAGTTTTAATCACAGCAGTTCTATTACTTCTGTCTTTACCTGTTTTAG
CTGGAGCTATCACAATGCTTTTAACGGATCGAAACTTTAACACTTCATTTTTTGACCCGTCGGGGGGTGGGGATCCTATC
CTTTACCAACACCTGTTT
>TWSC168-08|Pardosalapponica|COI-5P|KF368516
ACTTTATATTTAATGTTTGGAGTTTGATCAGCTATAATAGGAACTGCTATAAGAGTATTAATTCGAATGGAATTAGGAAA
TCCTGGGAGATTATTGGGTGATGATCATTTATATAATGTTATAGTTACTGCTCATGCTTTTGTAATAATTTTTTTTATAG
TAATACCTATTCTTATTGGAGGTTTTGGGAATTGATTAGTTCCTTTAATATTAGGAGCTCCAGATATATCATTTCCTCGA
ATAAATAATCTTTCTTTTTGGTTATTACCTCCTTCTTTGTTTTTATTATCTATATCTTCTATAGTAGAAATAGGAGTTGG
TGCTGGATGAACTGTTTATCCTCCTTTAGCATCTACAGTTGGACATATAGGAAATTCAATAGATTTTGCTATTTTTTCTC
TTCATTTAGCTGGGGCTTCTTCTATTATAGGGGCTGTGAATTTTATTTCTACTATTATTAATATACGGATATTGGGAATA
TCCATGGAGAAAGTTCCTCTTTTTGTTTGGTCAGTTTTGATTACAGCGGTATTATTATTACTTTCTTTACCTGTTTTAGC
AGGTGCTATTACTATATTATTAACAGATCGAAATTTTAATACTTCTTTTTTTGATCCTGCTGGTGGGGGGGATCCTATTT
TATTTCAACATTTATTT
>CNJAC1498-12|Trombidiformes|COI-5P
AACAATGTATTTTTATTTTGGAATATGAGCAGGTATATTAGGTGCTGGAATAAGACTTTTAATTCGGTTAGAATTAACTC
AACCAGGTTCTCTTTTAGAGAATGATCAAATTTATAACACAATTGTGACTGCTCATGCTTTTGTAATAATTTTTTTTATA
GTTATACCCATTATAATTGGAGGGTTTGGTAATTGATTAGTTCCTATTATAATTGGAGCACCAGATATAGCTTTCCCTCG
AATAAACAACATAAGATTTTGATTATTACCACCTTCTCTATCTCTTTTAATATTATCTGCTTTTACTTCAAAAGGAAGAG
GAACTGGGTGAACTGTATATCCTCCGTTATCTAATAATATATCTCATGCCGGTGCATCTGTAGATTTAACTATTTTTTCA
CTTCATCTTGCTGGAATTAGTTCTATTTTAGGTGCAATTAATTTTATAACTACTATTATAAATATAAAAACTCCCTACTT
AAGATTTGAACAAATTCCCTTATTTGTTTGATCTGTCTTTATTACTACAGTTTTACTTTTACTTTCATTACCTGTATTAG
CAGGAGCTATTACCATGCTTTTAACTGATCGTAATTTTAATACTTCTTTTTTTGATCCAATTGGTGG
>CNPCA040-13|Sarcoptiformes|COI-5P
AACTTTATATTTCATTTTCGGGGCATGGGCTGGACTGTTGGGCTCTGCTTTAAGAGCTTTAATTCGGCTTGAACTGGGGC
AACCCGGCTCTTTAATGGAAAACGATCAAATTTACAATACTGTTGTAACAGCACATGCTTTTGTAATAATTTTCTTTATA
GTGATACCTGTTATAATTGGGGGCTTTGGAAATTGACTTGTGCCGATAATGATTGGTGCTCAAGATATGGCCTTCCCCCG
AATAAACAACATAAGATTCTGGTTACTACCGCCTTCGCTAACTCTCCTTTCAGCGTCTGCTTTTGCCGGAACTGGAGCCG
GAACCGGTTGGACTGTTTACCCACCCTTGTCAGGAAATATATTTCATTCTGGCATTTCAGTAGATTTAGCTATTTTTAGG
TTACACCTAGCTGGAGCTTCTTCGATTTTAGGAGCAATTAATTTTATTACAACTATTATAAACATACGATCTTCATCCAT
AACTTTAGATTCAATGCCACTATTCGTGTGGTCAGTTTTAATTACAGCTGTCCTGCTTTTACTGTCTTTGCCGGTTCTAG
CTGGAGCAATCACAATACTTCTTACGGATCGTAATTTCAATACTTCATTCTTTGATCCTTCTGGGGGAGGGACCCC
>CHACC242-10|Hermanniareticulata|COI-5P|HQ941549
AACTTTATACTTTATTTTTGGAACCTGGGCTGGAGTGATAGGTTCCTCACTCAGAGGTCTTATTCGTTTAGAGTTAGGGC
AGCCTGGATCTTTGATAGAAAACGATCAAATTTATAACACAATTGTCACTGCACATGCTTTTGTAATGATTTTCTTTTTA
GTAATGCCAGTTATGATTGGAGGTTTTGGCAACTGGTTGGTACCAATGATAATTGGGGCACAAGATATAGCGTTTCCACG
TATAAACAATATGAGGTTTTGGCTTTTGCCCCCCTCGTTATCTCTTCTTTCTGCTTCTGCATTTGCAGGAATAGGAGCGG
GAACTGGGTGGACTGTTTATCCTCCTTTAGCCACAAGTATATTTCATTCTGGAATCTCTGTAGACCTAGCAATTTTTAGT
TTACATCTAGCAGGGGCATCTTCCATTTTGGGGGCAATTAACTTTATTACTACTATTATAAACATACGTTCAAGATCAAT
ATCTTTAGATTCTATCCCTCTATTTGTTTGATCTGTATTAATTACTGCCATTCTACTCTTGTTATCACTCCCTGTTCTTG
CAGGAGCTATCACAATATTATTAACCGATCGTAATTTTAACACTTCTTTTTTTGATCCTACTGGAGGGGGAGACCCCATT
CTTTATCAACACTTATTC
>BBCAN933-10|Araneae|COI-5P|HQ928155
AAGTTTATATTTTGTATTTGGAGCTTGGGCTGCTATAGTTGGAACAGCAATAAGTGTATTAATTCGGATTGAGTTAGGTC
AAACTGGAAGATTATTAGGAGATGATCAATTGTATAATGTAATTGTTACGGCTCATGCTTTTGTTATAATTTTTTTTATA
GTTATACCTATTTTGATTGGAGGATTTGGAAATTGGTTAGTTCCTTTAATATTAGGGGCTCCGGATATGGCTTTCCCACG
TATGAATAATTTAAGATTTTGACTTTTACCTCCTTCTTTATTTTTGTTATTTATTTCTAGAATAGATGAAATAGGTGTTG
GGGCTGGGTGGACAGTTTATCCACCACTTTCTTCTTTAGATGGACATTCTGGAAGATCAGTGGATTTTGCTATTTTTTCT
TTACATTTAGCTGGTGCTTCGTCTATTATAGGGGCCATTAATTTTATTTCTACTATTTTAAATATGCGAGGGTATGGAAT
AACTATAGAAAAAGTTCCTTTATTTGTGTGATCGGTGTTAATTACGGCTGTTTTATTACTTTTGTCATTACCGGTTTTAG
CAGGTGCTATTACTATATTATTAACAGATCGTAATTTTAATACCTCATTTTTTGATCCTTCAGGGGGAGGAGACCCAATT
TTATTCCAACATTTGTTT
>MYMCD068-11|Eupodes|COI-5P|JX835650
TACACTGTATTTTATTTTTGGTTTTTGATCTGGAATTTTGGGTGCATCTATAAGAATTATTATTCGGATAAAATTAGCTA
ATCCTGGTTTTATGGGTCAAAATGATCAAATTTATAATGTTATAGTAACAGCTCACGCTTTTGTTATAATTTTTTTTATA
GTCATACCAATTATGATTGGAGGTTTTGGAAATTGATTAGTTCCTTTAATGATTGGTGCTCCTGATATAGCTTTTCCTCG
TATAAATAATATAAGATTTTGATTGTTACCACCGTCTCTTATTATATTATTGCTTTCATCTTTCGCTGAAAGAGGGGCTG
GAACAGGATGAACAGTTTATCCTCCTTTGTCTAACTATCTGTTTCATGGAGGAATTTCAGTTGATTTAACTATTTTTTCT
TTACATATAGCAGGTATTTCATCTATTTTGGGTGCTATTAATTTTATTACTACTATTTTAAATATACGAATAAGTTTAAT
AAATTTTGAACGTTTACCATTATTTGTTTGATCTGTTTTAATTACTGCTGTTTTATTACTATTATCTTTACCAGTTTTAG
CAGGGGCTATTACAATATTACTTACAGATCGAAATTATAACACTTCCTTTTTTGATCCAGCAGGAGGAGGAGATCCTATC
TTATATCAACATTTGTTT
>CARSP211-11|Araneae|COI-5P|JN297540
TACTTTATATTTTATGTTTGGGGCTTGAGCTTCTATAGTGGGGACTGCTATAAGAGTATTAATCCGAATTGAGTTAGGAC
AATCTGGGAGATTTTTAGGTGATGATCATTTATATAATGTGATTGTTACAGCTCATGCGTTTATTATAATTTTTTTTATG
GTGATACCAATTTTAATTGGGGGATTTGGAAATTGATTAGTGCCTTTAATATTAGGGGCTCCTGATATGGCTTTCCCTCG
AATAAATAATTTGAGATTTTGATTATTACCTCCTTCTCTTTTTTTATTATTTATTTCTTCTATGGTGGATATAGGGGTTG
GTGCGGGATGAACGGTTTATCCCCCTTTAGCTTCATTAGAGGGTCATGCGGGAAGATCGATGGATTTTGCTATTTTTTCT
CTTCATTTGGCTGGTGCTTCTTCTATTATAGGAGCTATCAATTTTATTTCTACTATTTTTAATATACGAATTATAGGAAT
AAGAATGGATAGGATTCCATTGTTTGTTTGATCTGTTCTTATTACAGCTGTTTTATTATTATTATCTCTTCCTGTTTTAG
CGGGAGCTATTACTATATTGCTTACGGATCGAAATTTTAATACTTCTTTTTTTGATCCTTCTGGGGGGGGAGATCCTGTT
CTTTTTCAACATTTATTT
>ARONT788-10|Pelegrinagalathea|COI-5P|HQ924635
AACTTTATATTTAATTTTTGGAGCTTGATCAGCTATAGTTGGAACCGCTATAAGAGTATTAATTCGTATAGAATTAGGAC
AGACTGGTTCATTTTTAGGAAATGATCATATGTATAATGTAATTGTAACTGCACATGCTTTTGTTATAATTTTTTTTATA
GTAATACCGATTTTAATTGGTGGATTTGGTAATTGATTAGTTCCTTTAATATTGGGAGCTCCTGATATAGCTTTTCCTCG
TATAAATAATTTAAGATTTTGGTTATTACCTCCTTCTTTATTTTTATTATTTATTTCTTCTATGGCTGAAATAGGAGTAG
GGGCTGGGTGAACTGTATATCCACCTTTAGCTTCTATTGTAGGACATAATGGGAGATCAGTAGACTTTGCAATTTTTTCT
TTACATTTAGCTGGTGCTTCATCAATCATAGGAGCTATTAATTTTATTTCTACTATTATTAATATACGATCTTTAGGAAT
ATCTTTTGATAAGGTTCCTTTATTTGTTTGATCCGTTTTAATTACTGCTGTTTTGTTATTACTTTCGTTACCGGTTTTAG
CAGGAGCTATTACCATATTATTAACTGATCGAAATTTTAATACTTCTTTTTTTGATCCTGCAGGTGGAGGTGATCCTATT
TTATTTCAACATTTATTT
>GBCH6734-13|Nothrussilvestris|COI-5P|JF263774
TCTTCCTTAAGAGCCATCATTCGATTAGAATTGGGTCAACCAGGCTCCCTACTAGAGAATGACCAAATTTACAACACCAT
CGTCACCGCCCACGCATTTGTCATGATTTTCTTTATAGTAATGCCTGTAATAATTGGAGGATTCGGGAATTGACTGGTTC
CATTAATAATCGGAGCACAAGACATAGCCTTTCCACGTATAAACAATATAAGGTTTTGACTTCTACCGCCTTCTTTAACC
TTCCTAACGGCATCTGGGTTTGCTGGAATAGGAGCAGGAACGGGATGAACAGTATATCCACCACTAGCAGGGAACTTGTT
TCATTCAGGGATCTCAGTAGACCTAGCAATCTTCAGGTTACACTTAGCAGGTGCATCCTCCATTCTGGGAGCAATTAATT
TCATTACCACGATCATAAACATACGTTCCTCAACCAGAAGCCTGGACTCAATCCCACTATTTGTATGATCAGTACTAATT
ACTGCAGTGCTATTACTACTGTCCTTACCAGTATTAGCAGGGGCAATTACTATACTATTAACAGACCGTAACTTCAACAC
TTCATTCTTTGACCCAACAGG
>JSARA052-11|Araneae|COI-5P
AACTTTATATTTAATTTTTGGTGCTTGAGCTGCTATAGTAGGAACTGCAATAAGAGTATTAATTCGAATTGAATTAGGTC
AACCTGGTAGATTTATAGGGGATGATCAGTTATATAACGTTATTGTTACTGCTCATGCTTTTGTAATAATTTTTTTTATA
GTAATACCTATTTTAATTGGAGGTTTTGGAAATTGATTAGTTCCTTTAATATTAGGAGCACCTGATATAGCTTTTCCTCG
TATAAATAATTTAAGATTTTGATTACTTCCTCCATCATTATTTTTATTAATTGTTTCTTCAATAGTAGAAATAGGGGTAG
GTGCTGGGTGAACGGTTTATCCCCCTTTAGCAAGATTAGAAGGACATGCTGGAAGATCAGTAGATTTTGCTATTTTTTCA
TTACATTTAGCTGGGGCATCATCAATTATAGGAGCTATTAATTTTATTTCAACAATTATTAATATACGTTTTTATGGAAT
AACTATGGAAAAGGTTCCATTATTTGTGTGATCAGTTTTGATTACTGCTGTATTATTACTTCTTTCATTACCAGTATTAG
CTGGAGCTATTACAATATTACTAACAGATCGAAATTTTAATACTTCTTTTTTTGATCCTTCTGGGGGAGGAGACCCTATT
TTGTTTCAGCATTTATTT
>TZBCA386-07|Trombidiformes|COI-5P
AACAATATACTTTTGCTTCGGATTATGAGCAGGAGTTTTAGGGGCTGCTATAAGAATCATTATCCGAATGAAATTATCAC
ATCCATCAAGAATACCACAAACAGACCAAACCTATAACTCAATAGTAACAGCACATGCATTTGTAATAATCTTTTTTATG
GTTATACCTATTATAATTGGAGGATTTGGTAACTGACTAGTACCAATTATAGTGGGGGCCCCAGACATAGCATTCCCACG
AATAAACAACATAAGTTTCTGACTATTGCCCCCATCTTTATCAATATTACTATTATCTTCCATAACAGAAAGAGGAGTAG
GAACAGGGTGAACAGTATACCCTCCCCTATCAAACCAAATATTCCACAGAGGGGTAGCAGTAGATATAGCAATCTTTTCC
CTCCACTTAGCAGGAGTATCATCTATTCTGGGGGCAATTAACTTCATTACCACTATCATAAATCTAAAAATAAAATCAAT
AACATTTGAACAAATTCCCCTATTTGTATGATCAGTGCTTATTACAGCCATCCTATTATTAATATCATTACCAGTACTAG
CAGGAGCAATTACTATACTACTAACAGATCGAAATTTTAATACATCATTTTTTGACCCAGCAGGGGGGGGAGACCCAATC
CTATACCAACACTTATTC
>ARCN023-10|Trombidiformes|COI-5P|HQ924267
AACAATGTATTTTTATTTTGGAATATGAGCAGGTATATTAGGAGCTGGAATAAGACTTTTAATTCGGTTAGAGCTAACTC
AACCAGGTTCTCTTTTAGAAAATGATCAAATCTACAATACAATTGTAACTGCTCATGCTTTTGTTATAATTTTTTTTATA
GTTATACCTATTATAATTGGAGGATTTGGTAACTGATTAGTTCCTATTATAATTGGAGCTCCAGACATAGCTTTTCCTCG
TATAAATAATATGAGATTTTGACTACTACCACCTTCTCTTTCTCTTCTTATATTATCTGCTTTTACTTCAAAGGGTAGAG
GAACCGGATGAACTGTATATCCCCCTTTATCAAGCAATATTTCTCATTCTGGAGCATCTGTAGACTTAACTATTTTTTCA
TTACATCTTGCCGGAATTAGATCAATTTTAGGAGCAATTAATTTCATAACCACTATTATAAATATAAAAACTCCCCACTT
AAGATTTGAACAAATTCCTTTATTTGTCTGGTCTGTTTTTATTACTACTATTTTACTTTTATTATCATTACCTGTTTTAG
CAGGTGCCATTACCATGTTATTAACAGATCGTAATTTTAATACTTCCTTTTTTGATCCAATTGGAGGAGGAGATCCAATT
TTATATCAACACTTATTT
>MBIOH688-13|Cheiracanthiummildei|COI-5P
ACTTTATATTTTATATTTGGAGCTTGATCTGCTATAGCTGGAACAGCTATAAGAATTTTAATTCGAATGGAATTAGGACA
GTTAGGATCTTTTTTAGGAGATGATCAATTATATAATGTTGTAGTAACTGCTCATGCTTTTGTTATAATTTTTTTTATAG
TAATACCAATCTTAATTGGTGGTTTTGGAAATTGATTAGTTCCATTAATATTAGGAGCACCTGATATAGCTTTCCCTCGA
ATAAATAATTTAAGATTTTGACTTTTACCTCCTTCTTTATTTTTATTATTTATATCTTCTATAGTGGAAATAGGAGTTGG
TGCTGGATGAACTGTGTATCCTCCTTTAGCATCAGTTATAGGACATGCTGGAAGTTCAGTTGATTTTGCTATTTTTTCTT
TACATTTAGCTGGAGTATCTTCAATTATAGGAGCTATTAATTTTATTTCTACAATTATTAACATACGCTTATTTAGAATA
TCTATGGAAAAGATTCCTTTATTTGTATGATCAGTATTAATTACTGCTATTTTATTATTATTGTCTTTACCTGTATTAGC
AGGTGCTATTACTATATTATTAACTGATCGAAACTTTAATACT
>ARONT535-10|Diplocentriabidentata|COI-5P|HQ924423
AAGCTTATATTTTATTTTTGGGGCTTGAGCTGCCATAGTAGGGACAGCAATAAGAGTATTAATTCGAATTGAATTAGGTC
AAACTGGTAGATTATTGGGGGATGACCAATTATATAATGTTATTGTTACGGCTCATGCTTTTGTTATAATTTTTTTTATA
GTTATACCTATTTTGATTGGAGGATTTGGTAATTGGCTGGTTCCTTTAATATTGGGTGCACCTGATATAGCTTTTCCTCG
TATAAATAATTTAAGATTTTGGTTATTACCCCCTTCTTTATTATTATTATTTATTTCTAGTATAGATGAAATGGGAGTTG
GAGCGGGATGGACAGTGTACCCTCCTCTTGCTTCTTTGGAGGGGCATTCTGGGAGATCTGTGGATTTTGCTATTTTTTCT
TTACATTTGGCCGGGGCGTCGTCAATTATAGGGGCTATTAATTTTATTTCTACTATTTTAAACATGCGTGGGTATGGGAT
ATCGATAGAAAAAGTCCCTTTATTTGTTTGATCTGTTTTAATTACAGCTGTGTTGTTATTATTATCTCTTCCTGTGTTAG
CAGGAGCTATTACCATGCTTCTAACTGATCGTAATTTTAATACTTCATTTTTTGATCCATCTGGAGGAGGGGATCCTGTT
TTATTTCAACACTTATTT
>NCCE125-11|Mesostigmata|COI-5P
AACTTTGTATTTTTTGTTTTCTATTTGAGCAAGAATAAGAGGAACTGCTTTAAGAGTAATTATTCGATTAGAGTTAGGTC
AACCAGGTAGGTTATTAAATGACGATCAAATTTATAATTCAATTGTAACAGCTCATGCTTTTATCATAATTTTTTTCTTT
GTCATACCATCAATGATTGGAGGTTTCGGCAACTGACTAACTCCGTTGATATTAAATATTCCTGATATAGCTTTTCCACG
TTTAAATAACATAAGATTTTGACTCTTGCCACCAAGTCTAATACTTTTGTTTACTAGAATATTTACTGAAATAGGAGTAG
GAACAGGTTGGACTGTTTATCCTCCTCTATCTAATAACGTTAGGCATAGAGGAGTAGCTGTAGACTTAGCAATTTTTAGT
TTACACCTAGCTGGTTTATCCAGTATTTTAGGATCTATTAATTTCATCACTACTATTACTAGTTTACGATTTTCGAAAAT
AAACTCTATAACACTTTTTTTATGATCTGTATTTGTGACCACAATCTTATTGTTACTTAGATTGCCTGTTTTAGCAGGAG
CAATTACTATATTACTCTCGGATCGAAATTTTAATACAACTTTTTTTGATCCTTCTGGAGGAGGAGATCCTATCTTATAC
CAACATTTATTT
>MYMCE426-12|Peloribatespilosus|COI-5P|JX835697
AACTTTATATTTCATTTTTGGAGCTTGGGCTGGACTACTAGGATCAGCACTTAGAGGTTTAATTCGGTTAGAACTCGGGC
AACCGGGATCATTAATGGAGAATGATCAAATCTATAATACCATTGTCACAGCACATGCTTTTGTTATGATTTTCTTCATG
GTTATACCAGTAATAATTGGAGGATTCGGCAATTGACTAGTACCAATAATAATCGGAGCTCAAGATATGGCATTTCCTCG
GATAAATAATATGAGATTTTGATTATTACCACCCTCTTTAACCTTACTCTCAGCTTCAGCTTTTGCTGGAATGGGTGCAG
GAACAGGATGAACAGTGTATCCTCCATTAGCAGGAAATTTATTTCATTCAGGAATTTCAGTAGACCTGGCTATTTTCAGT
TTACATCTAGCAGGAGCCTCTTCAATTTTGGGAGCCATCAATTTCATTACTACTATTATAAATATACGATCTTCTTCTAT
GTCATTAGATTCAATTCCCTTATTTGTATGATCAGTCCTTATTACCGCAGTACTGCTACTATTATCTTTACCAGTTTTAG
CAGGGGCCATTACAATACTTTTAACAGATCGAAATTTTAACACTTCTTTCTTTGACCCATCTGGGGGAGGAGACCCAATT
CTATACCAACATCTATTT
>SPIAI100-10|Araneae|COI-5P|HM384286
AAGTTTATATTTTGTTTTTGGGGCTTGGTCTGCTATAGTAGGAACAGCAATAAGAGTATTAATTCGTGTTGAGTTAGGTC
AAACTGGAAGATTATTAGGGGATGATCAATTGTATAATGTTATTGTTACGGCGCATGCTTTTATTATAATTTTTTTTATA
GTTATACCTATTTTAATTGGTGGATTTGGGAATTGATTAGTTCCTTTAATATTAGGAGCTCCTGATATAGCTTTTCCTCG
TATAAATAATTTAAGATTTTGATTATTACCTCCTTCTTTATTATTATTATTTATTTCTAGTATAGATGAAATAGGAGTAG
GGGCTGGATGAACTATTTATCCCCCTTTATCTTCTTTAGAGGGTCATTCAGGTAGTTCTGTTGATTTTGCAATTTTTTCT
TTACATTTAGCTGGTGCTTCATCTATTATAGGGGCTATTAACTTTATTTCTACAATTTTGAATATACGTGGATATGGAAT
ATCTATAGAAAAAGTTCCTTTATTTGTGTGATCTGTTTTAATTACAGCTGTGTTATTATTATTATCTTTACCTGTTCTTG
CAGGAGCTATCACTATACTTTTAACTGATCGAAATTTTAATACTTCTTTTTTCGACCCCTCTGGGGGAGGTGATCCTGTA
TTATTTCAACATTTGTTT
>MYMCB531-11|Zerconidae|COI-5P|JX835826
AACTATTTATTTATTGTTTAGATTATGAACAAGAATACTAGGAATATCTTTAAGTCTTATTATTCGAATTGAATTAAGAA
CTCCTGGTTCATTAATTAATAATGATCAAATTTATAATGTAATAGTTACTGCACATGCTTTTATTATAATTTTTTTTATA
GTAATACCTATTATAATTGGAGGATTTGGAAATTGATTAATTCCTTTATTATTAAACGTACCTGACATAGCTTTTCCTCG
TCTTAATAATTTAAGATTTTGACTTCTTCCTCCTTCATTATTATTATTAATAACATCATCTATAATTGAATCTGGAACTG
GAACAGGATGAACTGTTTACCCCCCTCTTTCAAATAATATATCACATAGAGGAATAAGTGTAGACATGTCTATTTTTTCT
TTACATTTAGCTGGTATTTCTTCAATTTTAAGAGCAATTAATTTTATTGTAACAATTATTAATATAAAATCTTCTTTAAT
TTCTTTAGATAAATTTCCTTTATTTATTTGATCTATTTTAATTACAACTATTCTATTATTATTAGCTTTACCTGTATTAG
CAGGTGCTATCACAATACTTTTAACAGATCGAAATTTTAATACTTCATTTTTTGATCCTAATGGAGGAGGAGATCCCATT
TTATATCAACATTTATTT
>ARSO575-09|Araneae|COI-5P
TACTTTATATTTATTATTTGGAGCTTGATCAGCTATAGTTGGTACTGCTATAAGAGTTTTAATTCGGATGGAGTTAGGTA
ATTCTGGAAGATTATTAGGAAATGATCATTTATATAATGTTATTGTGACTGCTCATGCTTTTGTAATAATTTTTTTTATA
GTAATACCAATTTTGATTGGAGGTTTTGGTAATTGATTAGTACCTTTAATGTTAGGAGCTCCTGATATATCTTTTCCACG
TATAAATAATTTATCTTTTTGGTTGTTACCCCCTTCATTGTTTTTATTATTTATATCTTCTATGGTTGAAATAGGGGTTG
GTGCGGGTTGAACAGTATACCCTCCTTTAGCTTCTAGAGTAGGTCATATAGGAAGATCAATGGATTTTGCTATTTTTTCT
CTTCATTTAGCTGGTGCTTCATCAATTATAGGAGCTGTTAATTTTATTTCTACAATTATTAATATACGGAGTGAGGGGAT
AAGAATGGAAAAAGTTCCTTTATTTGTTTGATCTGTTTTAATTACAGCTATTTTATTGCTTTTATCGCTTCCTGTTTTAG
CAGGAGCTATTACTATGTTATTGACTGATCGTAATTTTAATACTTCTTTTTTTGACCCGGCTGGGGGAGGGGATCCAATT
TTATTTCAACATTTGTTT
>MYMCC469-11|Trhypochthoniuscladonicolus|COI-5P|JX837212
AACTCTTTATTTTATCTTTGGAACTTGAGCGGGTCTTATAGGATCCTCACTTAGAGCACTAATTCGGCTCGAGTTAGGAC
AGCCTGGCTCTTTACTGGAAAATGACCAAATTTACAACACAATTGTTACTGCTCACGCATTTGTTATAATTTTTTTTATA
GTGATACCTTTAATAATCGGGGGATTCGGAAACTGACTTGTACCGATAATAATTGGGGCACAAGACATGGCTTTCCCTCG
AATAAACAACATGAGATTTTGGCTCCTACCCCCATCTCTAATACTCCTTTCAGCTTCTGCTTTTGCAGGCATGGGGGTAG
GAACAGGTTGGACTGTGTATCCACCGCTGGCTGGGAATCTATTCCATTCAGGGATCTCAGTAGATCTCGCCATTTTCAGA
CTTCATTTAGCTGGTGCTTCCTCAATCCTAGGTGCAATCAACTTCATTACTACTATTATAAACATGCGATCTTCCTCATT
AAGATTGGATTCTATCCCATTATTCGTATGGTCAGTACTTATCACTGCAGTACTGCTACTTCTCGCCCTCCCAGTTTTAG
CAGGAGCCATCACAATACTATTAACGGATCGTAATTTCAACACATCATTTTTTGATCCAACAGGAGGAGGAGATCCAATC
TTATACCAGCATTTATTC
>OPILI223-11|Opiliones|COI-5P
GACTATATATATAATCCTTGGAGTTTGAGCTGCGATAGTAGGCTCAGCGCTAAGAATCCTAATTCGCACAGAGTTGGGGC
AACCAGGATCATTAATAAATGATGATCAGATTTACAATGTAGTAGTGACTTCCCACGCATTTGTAATAATTTTTTTTATA
GTGATACCTATTATAATAGGGAGCTTTGGTAACTGGTTAGTACCCTTAATACTGGGAGCACCTGATATAGCTTTTCCACG
ATTAAACAACATAAGATTCTGGCTCCTACCTCCTTCGTTCGTTCTTCTAATTAGCTCAACGATAGTGGAAAGAGGGGCAG
GGACAGGCTGAACAGTCTATCCCCCATTATCAAGTAATGCAGCCCACAGAGGGCCTTCAGTGGATCTAACTATCTTTTCC
TTACATTTAGCAGGAATCTCCTCAATTTTAGGGGCTATTAATTTTATCACAACAGTTATAAATATACGTACAAAGGGGAT
AGTTTATGAGCGTTTACCTCTATTCGTGTGATCAATTATTATCACTGCAGTCTTACTATTACTCTCACTCCCAGTGTTAG
CAGGAGCTATTACGATGCTACTGACTGATCGTAATTTCAACACATCTTTTTTTGACCCTGCAGGGGGAGGAGACCCTATC
CTATACCAACACTTATTT
>JSAUG1781-12|Trombidiformes|COI-5P
AACTTTATATTTTATTTTAGGAGTATGGGCCGGTATTTTAGGTTTAAGTCTAAGCGCAGTAATCCGCATAGAATTAAGTC
AACCTGGACAATTATTCTCTAGTGACCAAACATATAACTCAATTGTTACATCTCATGCCTTTATCATAATTTTTTTTATA
GTAATACCAATAATAATTGGAGGATTCGGAAATTGGCTAGTACCCATAATAATTGGAGCCCCTGATATAGCCTTCCCACG
AATAAACAATATAAGATTTTGACTTCTTCCCCCATCCTTATCTCTTCTTCTGATAGCTTCTTTTTCATCAATAGGTGTAG
GAACCGGATGAACAGTATACCCTCCTTTATCGGCTAATTTAGCTCACAGCTCGATGTCTATCGAAATAACAATTTTCTCG
CTCCACTTAGCAGGTGTTTCCTCGATTTTAGGAGCTATTAATTTTTTAGCCACAATTAGAAATATAAAAAGAAAAAGTTT
ATCAGCAGAAAAGACTCCTTTATTTGTTGTATCAGTTATAGTTACTGCCATCTTACTTTTATTATCCTTACCAGTGTTAG
CAGGAGCTATTACAATACTTCTAACAGACCGGAATTTTAACACAACATTTTTTGACCCCTCTGGAGGAGGAGACCCCATC
TTGTATCAACATTTATTT
>ARBCM722-13|Opiliones|COI-5P
TACAATATACATAATTTTTGGGATATGGGCTGCTATAATTGGGACAGCCCTTAGTATACTAATCCGAGCTGAATTGGGAC
AACCTGGGTCAATAATAAATGATGATCAAATTTATAATGTTATTGTAACCGCCCATGCCTTTGTTATAATTTTCTTTATA
GTAATACCTATTATAATTGGAGGGTTTGGAAACTGATTAGTCCCATTAATATTAGGAGCCCCTGATATAGCCTTCCCCCG
ACTTAATAATATAAGATTTTGATTGCTCCCCCCTTCTTTTTTACTATTACTATCATCAACAATGGTAGAAAACGGAGCAG
GAACAGGATGAACAGTATACCCCCCTTTATCAAGAAATATTGCTCATACAGGAGCCTCTGTAGATTTAACTATTTTTTCA
TTACACTTAGCAGGTGTATCCTCAATTTTAGGGGCTATTAATTTTATTACTACAATTATCAATATACGAACACAAGGAAT
AATTATAGAACGAATACCTCTTTTTGTCTGATCAGTAAAAATTACAGCTATTTTACTTCTTCTATCTTTGCCTGTTTTAG
CAGGTGCTATCACAATACTTCTTACAGATCGAAATTTTAACACATCCTTCTTCGACCCTGCAGGAGGGGGAGACCCTATT
CTTTACCAGCATTTATTT
>NCCE012-11|Sarcoptiformes|COI-5P
AACTTTATACTTTGTTTTCGGAGCTTGGGCCGGAATTCTAGGGTCTGCTCTGAGGGGTCTTATTCGTTTGGAGCTTGGTC
AACCGGGCTCCTTGTTAGAAAATGATCAAATCTACAATACTATTGTCACAGCACACGCCTTTGTTATAATTTTTTTTATA
GTAATACCAGCAATAATCGGAGGGTTTGGGAACTGGTTGGTTCCAATAATAATCGGAGCTCAGGATATGGCATTCCCACG
AATAAATAACATAAGCTTTTGGCTTTTACCCCCTTCCTTAACACTACTTTCTGCTTCTGCCTTTGCTGGGGTTGGAGCTG
GGACTGGTTGAACAGTGTATCCCCCCTTATCTGGAAATCTGTTTCATTCAGGAATCTCAGTAGATCTTGCTATCTTTAGT
CTGCATCTTGCGGGAGCCTCTTCTATCCTAGGGGCTATTAATTTTATTACAACTATTTTAAACATACGGTCTTCATCCCT
ATCTTTAGATTCAATCCCTTTATTTGTATGATCTGTACTAATCACTGCGGTATTGTTACTTTTATCGTTACCCGTCTTAG
CAGGAGCCATTACTATACTTCTAACAGATCGAAACTTTAACACCTCGTTTTTTGATCCTTCTGGAGGGGGAGACCCAATT
CTATATCAGCATTTATTT
>GACAC1015-12|Hadronychecerberea|COI-5P|JN130329
GCCATAAGAGTAATTATTCGTACCGAGCTAGGGCAAGTTGGAAGATTATTAGGGGATGACCATTTGTATAATGTTATTGT
TACAGCTCATGCTTTAGTGATGATTTTTTTTATAGTTATGCCTATCATAATTGGTGGGTTTGGTAATTGAATGGTTCCGT
TAATAATTGGAGCCCCTGATATAGCTTTTCCTCGTATAAATAATCTTAGATTTTGACTTCTTCCACCTTCTTTGTTTATA
CTATTATTATCTTCTATAACAGATGATGGGGTGGGGGCTGGGTGAACTATTTATCCTCCCCTATCTTCAAGTATAGGGCA
TAGTGGGGGTAGAATGGATTTTGCTATTTTTTCTTTACATCTGGCAGGAGCTTCTTCTATTATGGGGGCTATTAATTTTA
TTTCTACTATTTTTAATATACGTATGGTTGGTATAACTATAGAAAAAGTTCCTTTATTTGTTTGGTCTGTGTTGATTACT
ACTATCTTATTATTGTTGTCTTTACCAGTTTTGGCAGGGGCTATTACTATACTTTTGACTGATCGTAATTT
>MYMCF464-12|Cyta|COI-5P|JX834879
AACAATATATTTTCTGTTTGGAGCTTGAGCCTCTTTATTAGGGGCTTCAATAAGAATTCTAATTCGATTAGAACTTTCAC
AACCAGGTTCAATAATAGGGAACGACCAAATCTACAATACAATTGTAACAGCTCATGCTTTCGTAATAATCTTCTTCATA
GTAATACCAATCATAATCGGTGGATTCGGAAACTGATTAATTCCTCTAATAATTGGATCACCCGATATAGCATTTCCTCG
AATAAATAATATAAGATTTTGACTTCTTCCTCCTTCCCTATCTCTTCTATTAATATCTTCAATATCCAATAACGGAGCTG
GAACAGGCTGAACAGTTTACCCCCCCCTATCCAGTGGTCTATCTCATCCAGGGGCATCTGTTGATTTAACCATCTTCTCG
CTCCATTTAGCAGGAATTTCCTCCATCTTAGGAGCCATTAATTTCATATCAACAATCATTAATATACGAAATCCCAGCAT
GTCCTTCGAACGAATTCCTTTATTCGTATGATCTGTATTTATTACCGTTCTATTACTATTATTATCTCTTCCTGTCCTAG
CAGGAGCCATTACAATACTCCTAACAGATCGAAATTTCAACACCTCTTTTTTCGATCCAGTGGGTGGAGGAGATCCAATT
CTATATCAACATCTATTT
>GMGSJ800-13|Trombidiformes|COI-5P
TACCTTATATTTTATTCTGGGTGCTTGATCAGGAATAATAGGGCTCAGCCTAAGAGCTATTATTCGTATAGAATTAGGTC
AACCAGGTCAAATAATCTCCAACGACCAAATATATAATAGAATTGTTACAGCCCACGCCTTTATTATAATTTTTTTTATG
GTTATACCTATCATAATTGGTGGTTTCGGAAACTGATTGGCACCAATCATAATCGGTGCCCCAGACATGGCGTTTCCCCG
TATAAACAATATAAGATTTTGACTTCTTCCCCCCTCCTTAATACTCCTTGTTTTAGCATCTTTTGTTAATATAGGTGTTG
GAACTGGATGAACACTCTACCCTCCACTATCAAGATTTTTAGCCCACAGATACGCCTCTATTGAATTGTCCATTTTTTCT
TTACATCTTGCAGGGGCTGCTTCAATTTTGGGAGCAATCAATTTTCTCACTACATTTAAAAATATAAGTAATAAAAATCT
ATGATGGGATATAATCCCCTTATTCGTATGAGCTATCATAATCACAGTTATCCTTTTATTACTATCTCTTCCTGTTTTAG
CTGGAGCAATCACTATGCTTCTTATAGACCGCAATTTTAACACCACTTTCTTTGATCCCTCGGGAGGGGGGGA
>PPELE226-11|Araneae|COI-5P
AACTTTATATTTAATTTTTGGGGCTTGATCTGCTATAGTGGGAACGGCTATAAGAGTATTAATTCGAATTGAGTTAGGTC
AAACAGGTAGAATATTAGGAGATGATCATTTATATAATGTTATTGTTACGGCGCATGCGTTTGTTATAATTTTTTTTATA
GTTATACCTATTTTGATTGGGGGATTTGGAAATTGGTTAGTTCCTTTAATATTAGGGGCTCCTGATATAGCTTTTCCTCG
AATGAATAATTTAAGTTTTTGACTTCTTCCTCCTTCTCTTTTTATACTATTTGTATCTTCTATAGTTGAGATAGGTGTAG
GGGCTGGATGAACAGTTTACCCTCCTTTGGCTTCTTTAGAGGGGCACTCGGGAAGTGCTGTAGATTTTGCTATTTTTTCT
TTGCATTTAGCAGGAGCTTCATCTATTATAGGAGCTATTAATTTTATTTCAACTATTTTAAATATGCGTTCTTATGAAAT
AAGTATAGAAAAAGTTTCGCTTTTTGTGTGATCTGTGTTAATTACTGCGGTTTTGTTACTTTTGTCTTTACCTGTATTAG
CAGGAGCTATTACTATATTATTAACTGATCGGAATTTTAATACTTCTTTCTTTGATCCGGCAGGTGGAGGGGATCCAGTT
CTTTTTCAACATTTATTT
>SPICH697-09|Grammonotagentilis|COI-5P|GU684575
AAGTTTATATTTTATTTTTGGAGCTTGAAGTGCTATAGTGGGTACTGCTATAAGAGTATTAATTCGTATTGAATTAGGAC
AAACTGGAAGTTTACTTGGAGATGATCAATTATATAATGTTATTGTAACTGCTCATGCTTTTATTATAATTTTTTTTATA
GTTATGCCTATTTTAATTGGAGGTTTTGGAAATTGGTTAATTCCTTTAATATTAGGTGCGCCTGATATAGCATTTCCTCG
TATAAATAATTTAAGATTTTGGTTATTACCTCCTTCTTTATTATTATTATTTATTTCTAGAATAGATGAAATAGGAGTGG
GTGCAGGTTGAACTATTTATCCTCCTCTTGCTTCTTTAGATGGACATTCTGGAAGATCAGTGGATTTTGCTATTTTTTCT
TTACATTTAGCAGGGGCTTCTTCTATTATAGGAGCTATTAATTTTATTTCTACTATTATTAATATACGAGGGTATGGTAT
GACTATAGAAAAAGTTCCTTTATTTGTTTGATCTGTTTTGATTACAGCTGTATTATTATTATTATCTTTACCTGTGTTAG
CAGGTGCCATTACTATACTTTTAACAGATCGAAACTTTAATACATCATTTTTTGATCCATCTGGAGGAGGGGATCCTATT
TTATTTCAACATTTATTT
>BBUSA441-10|Araneae|COI-5P|HQ931510
AAGCTTATATTTTTTGTTCGGGGTATGATCAGCTATAGTGGGTACAGCAATAAGAGTATTAATCCGTATTGAGTTAGGGC
AATCTGGGTCATTTTTAGGGGATGATCAGTTGTATAATGTTATTGTTACTGCTCATGCTTTTGTAATAATTTTTTTTATA
GTTATACCTATTCTTATTGGGGGATTTGGTAATTGGCTAGTTCCTTTAATATTAGGAGCCCCGGATATAGCGTTTCCTCG
GATGAATAATTTAAGATTTTGGTTACTCCCCCCTTCCCTTTTTATATTGTTTATCTCATCTATAGTAGATGTCGGAGTAG
GGGCGGGGTGGACTGTGTATCCCCCTCTTGCTTCTTTAGACGGGCATCCTGGGAGATCCGTGGATTTTGCAATTTTTTCT
CTTCATCTAGCAGGGGCTTCTTCTATTATAGGGGCGATTAATTTTATTTCTACGATTATTAATATACGGATAAGAGGGGT
TACTATGGAAAAAGTCCCTCTTTTTGTGTGATCAGTACTAATTACTGCTGTTTTATTATTATTATCTTTACCTGTTCTTG
CAGGGGCTATTACTATACTGCTTACGGATCGAAATTTTAATACGTCTTTTTTCGACCCTTCAGGGGGAGGAGACCCGGTA
TTGTTTCAACATTTATTT
>SPIEU847-10|Araneae|COI-5P|HQ975397
GACTTTGTACTTAGTTTTTGGGGCATGAGCCGCTATGGTAGGGACAGCAATAAGTGTATTGATTCGAATTGAATTAGGTC
AGCCTGGGAGATTTATTGGAGATGATCAACTTTATAATGTTATTGTAACTGCGCATGCGTTTGTAATAATTTTTTTTATA
GTTATACCTATTTTAATTGGGGGATTTGGAAATTGATTAGTGCCTTTAATGTTAGGGGCTCCTGATATAGCGTTTCCTCG
AATAAATAATTTAAGATTTTGATTACTTCCTCCATCTTTATTTCTTTTGATTGTTTCTTCAATAGTTGAGATAGGAGTTG
GTGCAGGGTGGACTGTATATCCTCCTTTAGCCGGATTAGAGGGTCATGCTGGAAGATCAGTGGATTTTGCAATTTTTTCT
TTGCATTTAGCGGGGGCTTCTTCTATTATAGGGGCTATTAATTTTATTTCTACAATTATTAATATGCGTTTTTATGGAAT
AACAATAGAAAAAGTTCCTTTATTTGTGTGGTCTGTATTAATTACGGCTGTTTTACTATTACTTTCTTTACCCGTTTTGG
CAGGTGCTATTACTATATTATTAACTGACCGAAATTTTAATACATCATTTTTTGATCCTTCGGGAGGGGGAGATCCTATT
TTATTTCAACATTTATTT
>MYMCA308-11|Peloribatescanadensis|COI-5P|JX835172
AACTTTATATTTCATTTTTGGTGCATGAGCGGGCCTCTTAGGATCTGCCCTTAGAGGTCTAATTCGTCTCGAATTAGGAC
AGCCTGGTTCATTAATAGAAAATGACCAAATCTATAACACTATTGTTACGGCACATGCTTTTGTGATAATTTTTTTTATA
GTTATGCCAGTGATAATCGGAGGATTTGGTAATTGGCTAGTTCCTATAATAATTGGAGCTCAAGACATAGCTTTCCCACG
AATAAATAACATGAGATTTTGGCTTCTCCCCCCATCTTTAACTCTCCTTTCGGCTTCTGCTTTTGCAGGAATGGGAGTGG
GAACTGGTTGAACAGTTTATCCCCCCTTAGCCGGAAATTTATTTCACTCTGGGATTTCAGTAGATTTAGCAATTTTTAGT
TTGCATCTAGCTGGGGCTTCTTCAATTTTAGGAGCCATCAATTTTATTACTACAATTTTAAACATACGATCTTCTTCCTT
GACTTTAGACTCCATCCCTCTATTTGTGTGATCAGTTTTAATTACTGCAGTACTATTGTTACTATCCCTCCCTGTATTAG
CAGGAGCTATCACAATACTACTTACAGATCGAAACTTTAACACTTCATTTTTCGACCCTTCGGGGGGAGGGGATCCAATT
TTATACCAACATTTATTT
>CHACA295-08|Trhypochthoniustectorum|COI-5P|JX838213
AACTCTTTATTTTATTTTCGGGACCTGGGCTGGTTTAATAGGATCTTCACTAAGAGCTTTAATCCGGCTAGAATTAGGAC
AGCCTGGCTCTCTCCTAGAAAACGACCAAATCTACAACACAATTGTCACAGCTCATGCCTTTGTCATAATTTTTTTTATA
GTAATACCTGTAATAATCGGAGGATTCGGTAACTGACTGGTTCCTATAATAATTGGAGCACAAGACATAGCTTTTCCCCG
AATAAATAACATAAGTTTTTGGCTTTTACCCCCATCTTTAATGCTTCTTTCTACATCTGCTTTTGCAGGAATGGGGGTGG
GAACGGGATGAACCGTATATCCACCCTTAGCTGGAAACCTATTCCACTCAGGAATTTCAGTAGACCTCGCCATCTTTAGT
CTTCACTTAGCAGGTGCTTCCTCAATTCTAGGAGCGATTAATTTCATTACTACCATTATGAATATACGATCATCCTCGTT
AAGATTAGACTCCATCCCATTATTTGTGTGATCGGTGCTCATTACTGCAGTATTACTGCTTTTAGCTCTTCCCGTATTAG
CAGGAGCAATCACAATACTACTAACAGATCGAAATTTCAACACTTCGTTTTTCGATCCAACTGGAGGAGGGGATCCCATT
TTGTACCAACACTTATTC
>BBUSS161-09|Araneae|COI-5P|HM428800
AACATTATATTTAATTTTTGGAGCTTGATCGGCTATAGTAGGAACTGCAATAAGAGTATTAATTCGTATAGAATTAGGTC
AAACTGGCTCATTCTTAGGTAATGATCATATATATAATGTTATTGTTACTGCTCATGCTTTTGTTATAATTTTTTTTATA
GTTATACCTATTTTGATTGGAGGATTTGGTAATTGATTGGTTCCTTTGATATTAGGGGCTCCTGATATAGCATTTCCTCG
TATAAATAATTTAAGATTTTGATTATTACCTCCGTCTTTGTTTTTACTATTTATTTCTTCTATGGCTGAAATAGGGGTAG
GAGCAGGTTGAACGGTTTATCCACCTTTAGCTTCTGTGGTTGGTCACGGTGGAAGATCTGTAGATTTTGCTATTTTTTCT
TTACATTTAGCTGGTGCTTCTTCTATTATGGGTGCCATTAATTTTATTTCAACTATTATTAACATGCGTTCTGTTGGTAT
ATCTTTAGATAAAATTCCTTTGTTTGTTTGGTCAGTAATAATTACTGCGGTTTTATTATTATTATCACTTCCGGTACTAG
CTGGTGCGATTACTATATTGTTGACTGATCGAAATTTTAATACTTCTTTTTTTGATCCTGCTGGTGGTGGTGATCCTATT
TTATTTCAACATTTATTT
>SPICA1594-10|Dictynamajor|COI-5P|JF885176
TACTTTATATTTATTATTTGGAGCTTGATCTGCTATAGTAGGAACTGCAATGAGAGTATTAATTCGAATTGAGTTGGGTC
AACCTGGGAGATTTTTAGGAAATGATCAAATTTATAATGTTATGGTTACTGCTCATGCTTTTGTTATAATTTTTTTTATA
GTAATACCAATTTTAATTGGAGGTTTTGGAAATTGGTTGGTTCCTTTAATGTTAGGGGCCCCTGATATAGCTTTTCCTCG
AATGAATAATTTAAGATTTTGATTATTACCCCCTTCTTTATTATTATTGTTTATTTCTTCTATGGTTGAGATAGGTGTTG
GGGCTGGATGGACGATTTACCCTCCTTTGGCTTCTCTAGTTGGACATTCGGGTAGATCTGTAGATTTTGCAATTTTTTCT
TTACATTTGGCTGGTGCTTCTTCTATTATAGGAGCTATTAATTTTATTTCTACTATTATTAATATACGAATAGAAGGAAT
AACAATAGAAAAAGTTCCATTGTTTGTGTGATCTGTTTTAATTACTGCTGTTCTTTTATTATTGTCTCTTCCTGTTTTAG
CAGGAGCTATTACTATATTGTTGACTGATCGAAATTTTAATACATCGTTTTTTGATCCTGCGGGAGGGGGGGATCCTATT
TTATTTCAACATTTATTT
>ALBSP255-10|Araneae|COI-5P|HQ920343
AACTTTGTATTTGATTTTTGGATCTTGATCTGCTATAGTTGGAACAGCTATAAGAGTATTAATTCGAATAGAGTTAGGAC
AATCTGGAATATTTTTAGGAGATGACCATTTATATAATGTAGTAGTTACAGCTCATGCTTTTGTTATAATTTTTTTTATA
GTAATACCAATTTTAATTGGAGGATTTGGAAATTGAATGATCCCAATAATATTAGGAGCAGCTGATATAGCTTTTCCTCG
TATAAATAATTTGAGTTTTTGATTATTACCTCCTTCTTTATTATTATTATTTATTTCATCTATAGCTGAAATAGGAGTTG
GTGCAGGATGAACTGTATACCCTCCATTAGCATCTACTGTGGGTCATATAGGAAGAGCTATAGATTTTGCTATTTTTTCA
TTACATTTAGCTGGTGCTTCTTCAATTATAGGTGCAGTAAATTTTATTACTACAATTATTAATATACGATCTGTAGGAAT
AAGAATGGAAAAAGTTCCTTTATTTGTTTGATCTGTTTTAATTACAGCAGTTTTATTATTATTATCATTACCTGTATTAG
CAGGTGCTATTACTATATTATTAACTGATCGAAATTTTAATACATCTTTCTTTGACCCTGCTGGAGGGGGAGATCCTATT
TTATTTCAACATTTATTT
>MYMCB668-11|Mycobatesberingianus|COI-5P|JX835932
AACTTTATACTTTATTTTTGGTGCCTGAGCTGGTTTGCTTGGTTCAGCTTTGAGAGGATTAATCCGGCTAGAGCTTGGCC
AACCCGGATCCTTGCTAGAAAATGACCAAATTTACAATACAATTGTTACAGCTCACGCCTTCGTCATAATTTTTTTCATA
GTAATACCTATTATGATTGGAGGGTTTGGAAATTGGCTAGTTCCTATAATAATCGGAGCCCAAGACATGGCCTTTCCACG
AATGAATAATATAAGCTTCTGGTTACTTCCGCCTTCACTAGCCTTACTCTCTTCTTCAGCTTTTGCGGGAATGGGGGCTG
GGACAGGATGAACGGTTTACCCTCCTTTAGCCGGGAACTTATTTCACTCAGGGTTTTCGGTAGACTTGGCAATCTTTAGA
TTACATCTAGCAGGAGCCTCCTCAATCCTAGGTGCCATCAATTTTATCACTACCATCCTCAATATACGCTCTTCGTCTAT
AACATTAGACTCAATCCCACTATTTGTGTGATCTGTACTGATTACTGCGGTTCTGCTTCTCCTATCGTTGCCAGTTTTGG
CGGGGGCTATCACTATACTTCTTACAGATCGTAATTTTAACACTTCGTTTTTCGACCCGGCGGGGGGCGGTGACCCAATC
CTGTATCAACATTTATTT
>PMWMC175-07|Trombidiformes|COI-5P
TACTTTATATTTTGCTTTTGGGGCTTGAGCTGGTATAGTTGGGGCTTCAATAAGTATGCTAATTCGGTTTGAATTAGGGC
AGCCCGGAGCTTTTATTGGAAATGATCAAATTTATAATGTATTAGTGACAGCGCATGCTTTTGTTATAATTTTTTTTATA
GTTATGCCAATGATAATCGGAGGATTTGGTAACTGATTGGTCCCTTTAATGATCGGGTCTCCAGATATAGCATTCCCTCG
AATGAATAATATGAGTTTTTGATTACTACCTCCTTCGCTTAGTTTGTTGTTATTATCATCATTAGTGGGAATAGGTGCTG
GCACAGGTTGAACTGTTTATCCTCCTCTTTCTATAAATATTGCTCATGGGGGCATTTCTGTAGACTTGTCTATTTTCTCG
TTGCATTTAGCAGGGATTTCTTCAATCTTGGGAGCAGTTAATTTTATGGCTACTATCTTAAACATAAAGAGAGTCTATAT
GAAGTTTGAGCAGATTCCCTTGTTTGTGTGATCAGTCTTTATTACAGCTATTTTGTTATTACTGTCTTTACCCGTACTAG
CTGGGGCCATCACTATATTGTTAACCGATCGAAATTTTAATACTTCTTTTTTTGACCCGGCAGGAGGAGGGGACCCCATT
TTATTTCAACATTTATTT
>PHAUG1686-11|Trombidiformes|COI-5P
TTCTATGTATTTTATTTTTAGTTTATTTGCAGGATTAATTGGCTCTTCTTTTAGAATAATTATTCGTATGGAATTACTAC
AACCTGGTTCTTTAATCCAAAATGATTTTATTTATAACTCTACAGTCACTATCCATGCTATAATTATAATTTTTTTTATA
GTTATACCTGCTATAATTGGGGGTTTCGGAAATTGATTAATTCCATTAATAATTAATTCAACTGATTTATGCTTTCCTCG
ATTAAATAATATAAGATTTTGGTTATTAATCCCTTCTATCCTTTTAATATTATCTTCTTCTATAAAAATATTACTTAATG
GGGTAGGTTGAACAATATATCCCCCTTTAACTTCTATTCAATATTTTATATCTTCTTCAATTGAAATAATAATTTTTTCT
TTACATATCGCAGGTTTATCTTCTATTGCTAGATCAATTAATTTTATTTCTACTATTTTATTTATAAAAAATAAAAATTA
TTATATTAATTCTATAAATTTATTTAATCTATCAATTCTTATCACTACTTTCCTCTTATTATTAGCATTACCTGTTTTAG
CTGGAGCAATCACAATAATTTTATTAGACCGAAACTTTAATACTTCTTTCTTTGATCCAATAGGAGGAGGGGATCCTATC
TTGTATCAACATTTATTT
>ACMIT040-10|Trombidiformes|COI-5P|HQ919889
AACTTTATACTTCGCTTTTGGAGCTTGATCAGGGATAGTAGGAGCCAGACTTAGAACATTAATTCGATTAGAATTAGGAC
AACCTGGAACTCTCTTAGGAAGAGACCAAATTTATAATACAATCGTCACAGCTCATGCATTTGTCATAATTTTTTTTATA
GTTATACCTATAATAATCGGAGGATTCGGAAATTGACTGGTCCCCCTAATGATTAGAGCCCCCGATATAGCATTTCCCCG
AATAAATAATATAAGATTTTGGTTGCTGCCTCCCTCTCTTATCCTCCTTTTAACAAGCTCATTCACAGCAATAGGTGCTG
GGACTGGATGAACAGTTTATCCCCCACTATCTGGTAATTTAGCACATGCTGGACCTTCAGTAGATTTAACTATCTTCTCT
CTTCATTTAGCCGGAATCTCATCAATTTTAGGGGCAATTAATTTTATAGCAACAATCATTAATATGAAACCAAAAACAAT
AAAAATAGAACAAATCCCTTTATTTGTTTGATCAATCTTTATTACAGTTATTTTACTTCTTCTTTCCCTTCCGGTACTAG
CAGGAGCAATCACAATACTATTAACTGACCGAAACTTTAATACCTCTTTTTTTGACCCTGCTGGTGGAGGGGACCCAATT
TTATATCAACACCTCTTC
>MYMCB058-11|Cepheus|COI-5P|JX836264
CACTTTATATTTTATTTTTGGTGCATGGGCAGGATTATTAGGATCAGCTCTTAGAGCATTAATTCGTCTAGAATTAGGGC
AACCTGGATCTTTAATAGAAAACGATCAAATTTATAACACAATTGTCACTGCACATGCTTTTGTGATAATCTTCTTTATA
GTTATACCAGTTATAATTGGGGGATTTGGTAATTGACTAGTACCAATAATAATTGGAGCACAGGACATAGCCTTCCCTCG
AATAAACAACATAAGATTTTGACTTCTACCTCCCTCTCTCACTCTTCTATCTGCCTCTTCATTTGCTGGAATGGGTGCTG
GAACTGGATGAACCGTGTACCCCCCCCTGGCTGGAAATTTATTTCATTCAGGTATCTCCGTTGATCTGGCTATTTTCAGT
TTACACTTAGCAGGAGCCTCTTCCATCTTAGGAGCAATTAATTTTATCACCACAATCATAAACATACGATCTTCTTCAAT
AACTCTAGATTCAATTCCATTATTTGTGTGATCAGTTCTAATTACCGCAGTTTTACTGCTTTTATCTTTACCGGTTTTAG
CAGGTGCTATTACAATATTATTAACAGATCGGAATTTTAACACATCATTTTTTGATCCCTCAGGTGGAGGAGACCCCATC
CTATATCAACACCTATTT
>GMGSJ621-13|Anystidae|COI-5P
AACTATGTATTTTTATTTTGGGATATGATCAGGTATATTAGGTGCCGCAATAAGTTTACTAATTCGATTAGAGTTAACTC
AACCAGGTTCTCTTTTAGAAAATGACCAAATTTATAATACTATTGTAACTGCTCATGCTTTTGTCATAATTTTTTTTATA
GTAATACCTATTATAATTGGAGGATTTGGTAATTGATTAGTGCCCATTATAATTGGGGCCCCAGATATAGCTTTTCCTCG
AATAAACAATATAAGATTTTGATTATTGCCTCCTTCTTTATCTCTTTTAATACTTTCAGCTTTTACTTCAAAAGGAAGAG
GAACTGGATGAACTGTATATCCACCTTTATCTAATAATATATCTCATTCTGGTGCATCTGTAGATTTAACTATTTTTTCA
CTTCATTTGGCTGGAATTAGATCTATTTTAGGGGCCATTAATTTCATAACTACTATTATTAATATAAAAACGCCTTATTT
AAGATTTGAACAAATTCCTTTATTTGTATGATCAGTTTTTATTACTACTATTTTATTATTACTTTCATTACCTGTTTTAG
CGGGTGCTATTACAATGCTTTTAACAGACCGTAATTTTAATACTTCCTTTTTTGACCCAGTTGGGGGGGGGGA
>CNJAC1524-12|Trombidiformes|COI-5P
AACTATATATTTTGGCTTAGGAATTTGGTCAGCTATACTAGGAACATCATTAAGAAATATTATTCGTTTAGAACTAAACC
AACCTGGATCAATACTAGAAAACGACCAAATTTATAATTCAATTATTACAGCCCACGCTTTTATTATAATTTTCTTTATA
GTTATACCAATTATAATTGGCGGTTTTGGAAACTGGCTAATTCCTATAATAATAATAACACCAGATATAGCTTTTCCCCG
TATAAATAATATAAGATTCTGACTACTTCTATCATCATTAGTCTTATTAATTTCATCTATGCTATCCTCCCAAGGGAGAG
GAACAGGGTGAACAGTGTACCCCCCTTTATCAAATCAAATTTCTCATTCAGGCTCCTCAGTTGACCTAACTATTCTTTCG
CTCCATTTAGCAGGTATTTCCTCAATTATAAGCTCTTTAAATTTTATTATTACTATTTTAAATATAAAACCTAATACAAT
AAGATTAGAACATGTGCCCCTATTTGCTTGAAGTATTCTTATCACTACAATTCTGTTGCTACTAGCTTTACCGGTTTTAG
CAGGAGCTATTACAATACTTTTAACAGACCGAAATTTCAATACAGCATTTTTTGACCCTTGTGGGGGAGGGGATCC
>MYMCC338-11|Mycobatesconitus|COI-5P|JX834874
CACTTTATATTTTGTTTTCGGAGCTTGAGCCGGACTCCTAGGATCCGCTTTGAGAGGCCTGATTCGGCTAGAGCTAGGGC
AACCCGGATCATTGTTAGAAAACGATCAGATTTATAACACTATCGTTACAGCACATGCTTTCGTGATGATCTTTTTTATG
GTTATGCCAGTAATAATTGGGGGATTCGGGAACTGGCTGGTACCCATAATGATCGGGGCCCAAGACATAGCCTTCCCCCG
CATAAATAACATAAGATTCTGACTCCTACCTCCTTCTTTAGCTTTGCTCTCTTCATCAGCCTTCGCTGGGATAGGGGCTG
GAACGGGGTGAACAGTGTATCCTCCTCTGTCAGGAAGACTATTCCACTCAGGATTCTCTGTGGATCTTGCAATTTTTAGC
TTACACCTGGCAGGTGCCTCCTCTATCTTAGGGGCCATTAATTTTATTACTACGATTCTTAACATGCGATCTTCTTCCAT
GACCTTAGACTCAATTCCATTATTTGTATGGTCAGTACTTATCACGGCTGTGCTCCTTCTCCTATCCCTACCAGTACTCG
CTGGTGCTATCACAATACTTCTCACGGACCGAAATTTTAATACATCGTTTTTTGACCCTTCCGGAGGAGGAGACCCCATC
CTTTATCAACACTTATTC
>MYMCE710-12|Mycobatesincurvatus|COI-5P|JX837363
AACTCTATACTTTATCTTCGGAGCATGAGCCGGACTATTAGGTTCTGCATTAAGAGGTCTAATCCGTCTAGAATTAGGAC
AACCAGGATCTCTTATAGAAAATGACCAAATTTATAATACTGTAGTAACAGCCCACGCTTTTGTTATAATTTTCTTCATA
GTCATGCCAGTGATAATCGGAGGATTTGGAAATTGGTTAGTACCAATGATAATTGGGGCTCAGGACATAGCTTTCCCACG
AATAAATAATATAAGATTCTGACTTTTACCTCCTTCGCTAGCTCTTCTCTCATCCTCAGCCTTTGCTGGAGTTGGAGCAG
GTACAGGTTGAACTGTTTACCCTCCTTTAGCAGGTAATATATTCCATTCAGGAATTTCTGTAGATTTAGCTATTTTCAGG
TTACATCTTGCTGGTGCATCTTCTATTTTAGGAGCTATTAACTTCATCACAACCATCATCAATATACGATCTTCATCTGT
AACATTAGATAGAATTCCTTTATTTGTATGATCCGTTCTAATTACAGCTATCTTACTACTTCTATCTTTACCAGTTCTTG
CTGGAGCAATCACTATACTGTTAACGGACCGAAATTTTAACACATCCTTCTTTGATCCTTCGGGTGGGGGTGACCCGATT
TTATACCAACATTTATTT
>MYMCD105-11|Eupodidae|COI-5P|JX833636
AACTTTATATTTTATTTTTGGATTTTGATCAGGTATATTAGGAGCTTCTATAAGAATTATTATTCGAATAAAACTCTCCA
ATCCTGGTTTTATAGGACAAAATGATCAAATCTATAATGTTACAGTTACAGCACATGCATTTGTAATAATTTTTTTTATA
GTTATACCTATTATGATTGGTGGTTTTGGAAATTGGCTAGTTCCTGTAATAATTGGAGCTCCAGATATAGCCTTTCCTCG
AATAAATAATATAAGTTTTTGGTTACTACCCCCATCAATTATAATATTATTACTCTCTTCTTTTGCTGAAAATGGAGCAG
GTACAGGATGAACTGTTTACCCTCCATTATCTAATTATTTATTTCACGGAGGTATTTCAGTAGATTTAACTATTTTTTCA
TTGCATATGGCTGGTGTTTCTTCTATTTTAGGAGCTATTAATTTTATTACAACAATTATTAATATACGAATAAGTATAAT
GACTTTTGAACGTTTACCTTTATTTGTATGATCTGTATTAATTACTGCTGTTTTATTATTATTATCCTTACCTGTTTTAG
CTGGAGCTATTACTATGCTTTTAACTGATCGAAATTATAATACATCTTTTTTTGATCCTGCGGGTGGAGGAGATCCAATT
TTATATCAACACTTATTT
>SPICR336-11|Araneae|COI-5P
TACTTTATATTTAATATTTGGTGCATGATCTGCTATAGTGGGGACTGCTATAAGAGTGTTAATTCGTTTAGAATTAGGAA
ATTCTGGAAGTTTATTAGGAGATGATCATTTATATAATGTTATAGTTACTGCTCATGCTTTTGTGATGATTTTTTTTATA
GTAATGCCAATTCTTATTGGAGGTTTTGGTAATTGATTAATTCCTTTAATGTTAGGTGCTCCTGATATATCATTTCCTCG
AATGAATAATCTTTCTTTTTGGTTATTGCCCCCTTCTTTATTTTTATTAACTATGTCTTCTATAGTGGAAATAGGGGTAG
GAGCTGGTTGAACAGTTTATCCTCCTTTAGCATCTAGAATAGGTCATATAGGGAGTTCTATAGATTTTGCTATTTTTTCT
CTTCATTTAGCTGGTGCTTCTTCTATTATAGGGGCAGTAAATTTTATTTCTACTATTATTAATATACGAATATTAGGTAT
ATCTATAGATAAGGTACCTTTATTTGTTTGGTCAGTTTTGATTACGGCTGTTTTATTATTATTATCTTTACCTGTTTTAG
CAGGTGCTATTACTATGTTATTAACTGATCGAAATTTTAATACTTCTTTTTTTGACCCTGCAGGGGGAGGAGATCCTATT
TTATTTCAACATTTGTTT
>SSBAB1516-12|Araneae|COI-5P
GACGTTATATTTAATTTTTGGTGCCTGGGCAGCTATGGTAGGGACTGCAATAAGAGTTTTAATTCGAATTGAGTTGGGTC
AAACGGGAAGAATGTTAGGGGATGACCATTTGTATAATGTAATTGTAACAGCGCATGCTTTTATTATAATTTTTTTTATA
GTTATACCTATTTTAATTGGGGGTTTTGGTAATTGATTAGTACCTTTAATATTAGGGGCTCCGGATATAGCTTTTCCTCG
TATAAATAATTTAAGTTTTTGGTTACTTCCTCCTTCTTTATTAATATTATTTATTTCTTCTATAGTAGAGATAGGTGTTG
GAGCTGGTTGGACTGTATATCCGCCATTGGCTGGATTGGAAGGGCATTCTGGGAGATCTGTGGATTTTGCCATTTTTTCA
TTACATTTAGCAGGGGCTTCTTCTATTATGGGGGCTATTAATTTTATTTCTACAATTTTAAATATACGAGCGTATAATAT
CAGAATGGAGAAGGTTTCTTTATTTGTATGATCAGTATTGATTACGGCTGTTCTTTTATTGTTATCTCTACCTGTTTTAG
CAGGAGCTATCACTATATTATTAACTGATCGAAATTTTAATACTTCTTTTTTTGACCCTGCAGGGGGGGGAGATCCTGTG
TTGTTTCAGCATTTATTT
>CHACB547-10|Platynothruspeltifer|COI-5P|HQ558663
AACTTTATACTTCATTTTTGGAACCTGAGCTGGGTTAATAGGATCTTCCTTAAGTGCCCTGATCCGTCTTGAATTGGGAC
AACCCGGTTCACTCCTAGACAATGACCAAATTTATAACACCATTGTTACAGCCCACGCTTTTGTAATAATTTTCTTCATG
GTAATGCCTGTAATAATTGGCGGATTCGGAAATTGATTAGTTCCACTAATAATCGGAGCTCAGGACATAGCTTTCCCTCG
TATAAACAACATAAGATTCTGGCTTCTCCCTCCGTCATTATGCCTCCTTTCAGCATCCGCCTTTGCCGGACTAGGAGTGG
GGACTGGCTGAACTGTCTACCCTCCCCTAGCTGGAAACCTCTTCCACTCAGGATTTTCCGTAGATCTCGCAATCTTTAGC
CTTCACCTGGCAGGCGCTTCCTCTATTCTAGGAGCCATTAATTTTATCACCACAATCTTAAATATACGGTCATCCACGAT
AAGTTTAGACTCCATTCCACTATTCGTTTGATCAGTTCTAATCACCGCCGTTTTATTATTACTAGCATTACCAGTATTGG
CCGGAGCTATCACAATACTCCTAACGGACCGAAACTTCAATACAACATTTTTTGATCCTGCCGGTGGGGGAGACCCCATC
TTATACCAACATTTATTT
>MYMCE812-12|Trhypochthoniustectorum|COI-5P|JX837677
AACTCTTTATTTCATCTTTGGAACCTGAGCAGGTCTTATAGGATCTTCACTGAGAGCACTAATTCGACTCGAGCTTGGAC
AACCTGGCTCCTTACTAGAAAATGACCAAATTTACAACACAATTGTTACAGCACATGCATTTGTTATGATTTTTTTTATA
GTAATGCCTGTAATAATCGGAGGATTCGGAAATTGACTTGTACCAATAATAATCGGGGCACAAGACATGGCTTTTCCTCG
AATGAACAACATAAGGTTCTGACTCCTTCCTCCATCTCTAATACTTCTTTCTGCCTCCGCTTTCGCGGGCATAGGAGTAG
GAACTGGATGGACGGTATATCCCCCACTCGCTGGGAACTTATTTCACTCAGGAATCTCAGTGGATCTAGCTATTTTTAGA
CTTCACCTAGCGGGTGCTTCCTCAATCCTGGGCGCAATTAACTTCATCACTACTATTATAAATATACGGTCATCTTCATT
AAGATTGGACTCAATTCCATTATTTGTTTGATCAGTACTCATCACTGCAGTACTCTTACTTCTAGCCCTTCCTGTACTGG
CAGGAGCCATTACCATGCTACTGACAGACCGTAACTTCAACACTTCATTTTTTGACCCAACAGGAGGGGGCGACCCAATT
TTATACCAACATTTATTT
>SSBAC2883-12|Piratulainsularis|COI-5P
TACGTTATATTTAATTTTTGGTGTATGGTCAGCTATAATTGGAACTGCAATAAGAGTATTAATTCGAATAGAATTGGGAC
ATTCTGGAAGTTTATTAGGAGATGATCATCTATATAATGTAATAGTTACTGCTCATGCTTTCGTTATAATTTTTTTTATA
GTAATACCTATTTTAATTGGAGGTTTTGGTAATTGATTAGTTCCTTTAATATTAGGTGCACCTGATATATCTTTTCCTCG
AATAAATAATTTATCATTTTGATTATTACCACCTTCTTTATTTTTATTATTATTATCTTCAATGGTGGAAATAGGAGTTG
GGGCTGGATGAACTGTTTATCCACCTTTAGCTTCTAGAATAGGTCATATAGGAAGATCTATGGATTTTGCAATTTTTTCT
TTACATTTGGCAGGTGCGTCTTCTATTATAGGAGCAGTTAATTTTATTTCTACTATTATTAATATACGTTTAGTAGGAAT
AAGAATGGAAAAGGTCCCATTATTTGTTTGATCTGTTTTTATTACAGCTGTTTTATTATTATTATCTTTACCAGTTTTAG
CTGGTGCTATTACTATACTTCTTACTGATCGTAATTTTAATACTTCATTTTTTGATCCTGCTGGAGGTGGAG
>SSWLF3191-13|Arachnida|COI-5P
AACTTTATATTTCATATTTGGAGCCTGGGCTGGACTTTTAGGTTCTTCTCTCAGAGCTCTTATTCGACTTGAATTAGGAC
AACCTGGTTCTTTATTAGGAAACGATCAAATTTATAACACAATTGTGACAGCTCACGCCTTTGTTATAATTTTCTTTATG
GTAATACCAATTATAATCGGAGGATTCGGTAATTGATTAGTACCAATAATAATCGGAGCTCAAGATATAGCTTTCCCACG
AATAAATAATATAAGATTTTGACTACTACCCCCCTCCCTATTTCTTCTAGCCATTTCAGCTTTTGCTGGAACGGGGGTGG
GTACTGGATGAACTGTGTACCCCCCACTCTCTAGAAGAATTTTTCAAGCAGACATTTCCGTAGATCTCGCCATCTTTAGA
CTACATATAGCTGGTATATCTTCTATTTTAGGAGCTATCAACTTTATTACGACTATTTTAAATATATCAAACTCACACTT
AACACCAGATTCAATTCCTTTATTTGTATGGTCAGTTTTAATTACTTCTGTTCTTCTCTTACTATCTTTACCAGTCTTAG
CTGGAGCTATCACAATACTACTAACAGACCGAAACTTTAACACTTCTTTTTT
>KKCHE846-09|Xysticuslabradorensis|COI-5P|KF369055
GACTTTATATTTATTATTTGGTGCTTGATCGGCTATAGTTGGTACTGCAATAAGAGTTTTAATTCGTATAGAGTTAGGAA
ATGTGGGTAGATTATTAGGTAATGACCATTTATATAATGTTATTGTTACAGCTCATGCTTTTGTAATAATTTTTTTTATA
GTGATACCAATTTTAATTGGGGGTTTTGGAAATTGGTTAGTGCCTTTAATGTTAGGAGCTCCTGATATATCTTTTCCTCG
AATAAATAATTTATCTTTTTGACTTCTTCCTCCTTCATTATTTTTATTATTTATATCTTCTATAGTGGAAATAGGTGTAG
GAGCGGGATGAACTGTTTATCCTCCTTTAGCTTCTAGTGTTGGGCATATAGGAAGATCTATAGATTTTGCTATTTTTTCT
CTTCATTTAGCTGGGGCTTCTTCTATTATAGGGGCTGTAAATTTTATTTCTACTATTATTAATATACGGGTGAGAGGAAT
AAGAATGGAAAAAGTTCCATTGTTTGTTTGATCTGTTTTAATTACTGCTATTCTTCTTCTTTTATCTTTGCCTGTTTTAG
CTGGAGCTATTACTATATTATTAACTGATCGTAATTTTAATACTTCTTTTTTTGATCCTGCAGGGGGAGGAGATCCTATT
TTATTTCAACATTTATTT
>MYTMC062-09|Nothrus|COI-5P|GU680465
AACTTTATACTTCATTTTTGGTGCCTGAGCTGGAATGCTAGGATCGTCCCTCAGTGCTATCATTCGGCTAGAGTTAGGAC
AACCAGGATCACTTCTAGAAAACGACCAAATTTATAATACAATTGTCACCGCCCATGCCTTTGTAATAATTTTCTTCATA
GTAATACCCATTATAATTGGGGGATTTGGAAACTGGCTAGTTCCACTAATGATTGGAGCTCAAGACATGGCTTTCCCACG
AATAAATAATATAAGATTCTGACTTCTACCCCCGTCCCTAACCTTTCTGACCGCATCAGGCTTCGCCGGGATGGGGGCTG
GAACAGGATGAACTGTATACCCCCCTCTGGCTGGAAACTTATTCCACTCCGGAATCTCTGTAGATTTAGCGATTTTCAGC
CTACACCTAGCAGGTGCTTCATCCATCTTGGGGGCAATCAACTTTATCACTACAATCATGAATATGCGGTCTTCAACAAG
AAGGTTAGACTCAATTCCCCTATTTGTATGGTCAGTACTAATTACTGCAATCTTACTATTACTTTCTCTACCTGTTTTAG
CAGGCGCTATTACTATACTTCTAACCGATCGTAACTTCAACACCTCTTTTTTCGACCCTACAGGGGGTGGTGATCCTATC
CTATACCAACACTTGTTT
>BBUSE1436-12|Araneae|COI-5P
TACTTTGTATTTGATTTTTGGAGCTTGATCAGCTATAGTGGGAACTGCAATAAGAGTATTAATTCGAATAGAATTAGGAC
AGACTGGAAGCTTTTTAGGAAATGATCATATATATAATGTAATTGTTACTGCTCATGCTTTTGTTATAATTTTTTTTATA
GTAATGCCTATTATAATTGGTGGATTTGGAAATTGATTGGTGCCTTTAATGTTAGGTGCACCTGATATAGCTTTTCCTCG
AATAAATAATTTGAGATTTTGATTATTACCTCCTTCTTTAATGTTATTATTTGTTTCATCATTAGCTGAGATAGGTGTAG
GGGCGGGATGAACTGTATATCCTCCTTTGGCTTCTATTGTTGGGCATAATGGAAGATCGGTGGATTTTGCTATTTTTTCA
TTACATTTAGCTGGAGCTTCTTCTATTATAGGTGCTATTAATTTTATTTCAACTGTAATTAATATACGTTCTGTGCAAAT
AAGTTTGGATAAAGTTCCTCTATTTGTATGATCAGTTGTTATTACTGCTGTTCTTTTATTATTATCCTTACCTGTTTTAG
CAGGGGCTATTACTATACTGTTAACAGATCGAAATTTTAATACTTCTTTTTTTGATCCGGCTGGAGGTGGAGATCCAATT
TTATTTCAACATTTATTT
>SPICA966-10|Araneae|COI-5P|JF886131
AACTTTATATTTTATTTTTGGAGCATGAGCTGCTATAGTAGGAACAGCTATGAGAGTGTTAATTCGAATTGAGTTAGGCC
AAACTGGAAGATTATTGGGAGATGGCCAATTATATAATGTAATTGTAACGGCCCATGCTTTTGTAATAATTTTTTTTATA
GTTATACCTATTTTGATTGGAGGTTTTGGTAATTGATTAGTTCCTTTAATGTTAGGAGCACCTGATATGGCTTTTCCTCG
AATAAATAATTTAAGTTTTTGACTATTGCCTCCTTCTTTATTCATATTATTTATTTCTTCTTTAGCTGAAGTTGGTGTTG
GGGCTGGGTGAACTGTATATCCTCCTTTATCTTCTTTAGAAGGTCATTCGGGAAGATCTATAGATTTTGCTATTTTCTCT
TTACATTTAGCTGGAGCTTCTTCAATTATAGGGGCTATTAATTTTATTTCTACAATTTTAAATATACGAGCTTATGGAGT
CTCTATAGAAAAAGTTTCTTTATTTGTTTGATCAGTTTTAATTACAGCTGTACTTTTATTATTATCTTTACCTGTTTTAG
CAGGAGCTATTACAATACTATTAACTGATCGTAATTTTAATACCTCTTTTTTCGATCCAGCTGGAGGAGGAGATCCTATT
TTATTTCAACATTTATTT
>MYMCC617-11|Eueremaeuscf.quadrilamellatus|COI-5P|JX837996
AACTTTATATTTCATTTTCGGAGCTTGAGCTGGCCTGCTAGGTTCTGCTTTAAGTGCCCTTATCCGTTTAGAATTAGGAC
AACCAGGATCTCTTATAGAAAATGACCAAATTTATAATACAATTGTTACAGCTCACGCTTTCGTAATAATTTTCTTTATA
GTGATACCTGTAATAATTGGAGGATTTGGAAATTGATTGGTTCCTATAATAATTGGAGCACAAGACATGGCCTTCCCCCG
GATAAATAATATAAGCTTTTGACTGTTACCTCCTTCTCTTTCGCTTCTCTCCGCTTCTGCTTTTGCAGGAATAGGAGCTG
GAACTGGATGAACAGTATATCCTCCCTTAGCTGGTAATCTATTCCATTCTGGATTTTCAGTTGACCTAGCAATTTTTAGT
TTACATCTAGCAGGAGCTTCCTCTATTCTAGGGGCTATTAATTTTATCACCACCATTATGAATATACGTTCATCATCTAT
AACATTAGATTCTATCCCACTATTTGTTTGATCTGTTTTAATTACAGCAGTGCTATTATTATTATCTTTACCAGTATTAG
CAGGAGCAATTACAATGTTATTAACAGATCGTAATTTCAATACTTCATTCTTTGACCCCGCTGGAGGGGGAGATCCTATC
TTGTACCAGCATTTATTC
>OPILI373-11|Opiliones|COI-5P
GACAATATACATAATTTTTGGCTTTTGAGCCGCTATAGCAGGCTCCGCTCTTAGTGTTCTGATCCGAACAGAACTAGGGC
AACCAGGGTCTCTTATAAATGACGATCAAGTCTACAACGTAATCGTGACATCACACGCCTTTGTTATAATTTTTTTCATA
GTGATACCCATCATAATGGGTAGTTTTGGAAATTGACTAGTTCCCTTAATATTAGGAGCCCCAGATATAGCCTTTCCACG
CCTTAATAACATAAGATTCTGGCTTCTACCCCCCTCTTTCCTCCTTTTATTAAGATCCACTATAGTAGAAAGAGGAGCAG
GCACAGGGTGGACAGTCTACCCCCCACTGTCAAGAAACACAGCGCATAGAGGGCCCTCTGTAGACCTAACTATTTTTTCT
CTACATTTAGCAGGAATCTCCTCTATTCTAGGAGCAGTTAATTTCATTACTACTATCATTAATATACGCACTAAGGGGGT
AATCTACGAACGACTACCTTTGTTCATCTGATCAATCAAAATTACGGCTATCCTCCTTCTCCTGTCCCTACCCGTGTTAG
CTGGGGCTATCACAATATTACTAACAGACCGTAATTTTAATACATCGTTTTTTGACCCTTCAGGGGGAGGAGACCCTATT
CTATACCAGCATCTATTC
>MYMCE619-12|Zerconidae|COI-5P|JX837536
TACTTTATATTTAATACTTAGATCTTGAGCCGGAATCTTAGGAACAGCTTTAAGAATACTAATTCGATTAGAATTAAGAC
AACCAGGTTCTTTATTAAACAATGATCAAATTTATAATACCATTGTAACTTCACATGCTTTTGTAATAATTTTTTTTATA
GTTATACCCTCTTTAATTGGAGGTTTTGGAAACTGATTAATCCCCTTATTAATTATAGCTCCAGATATAGCTTTTCCTCG
AATAAATAATATAAGATTTTGATTATTACCTCCTTCTTTAATATTTTTAATTAGATCATCAATAATTGAAATAGGAGCAG
GTACAGGATGAACTGTTTATCCTCCTCTTTCTAGAAACCTATCCCACAGAGGAGCATCTGTTGATTTAACAATTTTTTCT
CTGCATTTAGCTGGAGTTTCGTCTATTTTAGGATCTATTAACTTTATTTCTACAATTATAAATATACGTCAAAAAAATAT
AACTATAGAAAATATTCCCTTATTTGTATGGTCAGTATTTATTACAACTATTCTCTTATTACTATCATTACCAGTTTTAG
CCGGAGCTATTACCATACTATTAACAGATCGCAATTTTAATACATCATTTTTTGACCCAAGAGGAGGAGGAGATCCTATT
TTATATCAACATTTATTT
>MYMCE654-12|Scutozeteslanceolatus|COI-5P|JX837309
AACTTTATATTTTATTTTTGGTGCTTGAGCTGGTCTGTTAGGATCTGCTCTTAGAGGGCTGATCCGATTAGAATTGGGGC
AACCAGGATCTCTTATAGAGAATGACCAAATTTATAACACTATCGTAACAGCTCATGCTTTTGTGATAATTTTTTTTATA
GTGATACCAATAATAATTGGAGGTTTCGGGAACTGGTTAGTTCCAATAATGATTGGAGCACAGGATATAGCGTTCCCACG
TATAAACAACATAAGATTTTGGTTACTACCTCCTTCCCTAGCCTTATTAGCTTCTTCAGCTTTTGCTGGAATAGGAGCTG
GCACAGGGTGAACTGTGTATCCTCCTTTAGCAGGAAATATTTTCCATTCAGGATTTTCTGTGGATTTAGCAATTTTCAGG
CTCCATTTAGCAGGGGCTTCTTCTATTTTAGGAGCAATTAATTTCATTACAACAATCCTTAACATGCGATCTTCTTCTAT
AACATTGGATTCAATTCCGTTATTTGTATGATCTGTCTTGATTACCGCAGTTCTCCTACTGCTGTCTCTTCCAGTTTTGG
CTGGGGCTATCACAATACTTTTAACGGACCGAAACTTCAATACATCATTTTTCGATCCATCTGGAGGTGGGGATCCAATT
CTATACCAACATCTATTC
>MYMCA155-11|Anachipteriahowardi|COI-5P|JX838445
TACTCTTTACTTTATTTTTGGGGCTTGAGCTGGTTTGTTAGGATCTGCTTTAAGTGGCTTAATTCGACTTGAGTTGGGCC
AGCCTGGGTCTCTACTTGAAAATGATCAAATTTATAATACTATTGTTACTGCCCATGCTTTTGTTATAATTTTTTTTATA
GTTATACCTGTTATGATTGGGGGATTTGGGAACTGACTAGTGCCTATGATGATTGGAGCTCAGGATATGGCGTTCCCTCG
GATGAACAATATAAGATTCTGATTACTTCCTCCTTCGTTGACTTTACTTTCTTCTTCAGCTTTTGCTGGCATGGGAGCAG
GAACGGGATGAACAGTTTACCCTCCTTTAGCTGGGAATTTATTTCATTCTGGGTTTTCAGTTGATCTCGCAATTTTTAGA
CTTCATTTGGCCGGGGCATCCTCAATCTTAGGTGCTATTAATTTCATTACTACTATTATAAATATACGATCTTCTTCTAT
AACTTTAGATTCTATCCCTTTATTTGTTTGGTCAGTTTTAATTACGGCTGTTTTATTACTATTATCTTTACCAGTTCTTG
CTGGAGCAATCACTATACTCTTAACTGATCGGAATTTTAATACCTCATTTTTTGATCCTTCTGGAGGAGGAGACCCTATT
TTGTACCAACATCTTTTT
>PHAPR1304-11|Mesostigmata|COI-5P
GACCCTTTATCTCATATTCTCTTTATGAGCAGGAATATTGGGAACTTCTCTTAGAATAATTATTCGGATTGAATTAGGAC
AGCCCGGATCCTTAATTGGTGATGATCAAATTTATAATATAATTGTTACAGCTCATGCTTTTATTATAATTTTTTTTATA
GTTATACCAGCTATAATAGGAGGATTTGGAAACTGATTAATTCCTTTAATAATAAGTGCTCCAGATATAGCTTTTCCTCG
AATAAATAATATAAGATTTTGGCTACTTCCTCCAAGTATAATTTTTTTATTATTTAGAAGAATAGTAGAAAGAGGAGTAG
GAACAGGTTGAACTGTTTATCCTCCTTTATCTAGAAATATTAGACACTCAGGATACGCTGTTGATATAGCTATTTTTAGC
TTACATCTTGCGGGAGTATCTAGAATTTTAGGCTCTGTAAATTTTATTTCAACTATTTTTAATATGCGATTAAAATCAAT
AATTTTAGAACAAATTCCCCTATTTGTTTGATCAATTTTTATTACAACTATTTTGTTGTTGTTAAGTTTACCTGTTTTAG
CAGGGGCTATTACAATATTACTTCTTGATCGAAATTTTAATACTTCTTTTTTTGATCCTAGAGGAGGAGGAGACCCTATT
TTATATCAACATTTATTT
>ARONW226-11|Araneae|COI-5P
AAGTTTATATTTTTTATTTGGAGTTTGATCTGCCATAGTGGGGACAGCTATAAGAGTTTTAATTCGGATTGAGTTAGGGC
AATCTGGTAAATTTCTTGGTGATGATCAATTATATAATGTAATTGTAACTGCTCATGCTTTTGTAATAATTTTTTTTATA
GTTATACCAATTTTAATTGGGGGTTTTGGGAACTGGTTAGTACCATTAATATTAGGAGCGCCGGATATGGCTTTTCCTCG
AATGAATAATTTAAGTTTTTGGCTATTACCACCTTCTCTCTTTATATTATTTATTTCATCTATAGTAGATGTAGGAGTTG
GGGCAGGTTGAACTGTTTACCCTCCTTTATCTTCTTTAGAAGGGCATTCAGGCAGATCTGTAGATTTTGCTATTTTTTCA
CTTCATTTAGCTGGAGCCTCTTCAATTATAGGGGCTATTAATTTTATTTCTACTATTCTTAATATACGGATAAGAGGGAT
TTCTATAGAAAAGGTGCCTCTTTTTGTTTGATCTGTTTTGATTACAGCAGTATTATTACTTTTATCTTTACCCGTATTAG
CTGGGGCAATTACTATGTTATTGACGGATCGAAATTTTAATACATCTTTTTTTGACCCTTCGGGGGGAGGAGACCCTGTT
TTGTTTCAACATTTATTT
>MYMCB623-11|Ceratoppiaquadridentata|COI-5P|JX833840
AACTTTATATTTTATTTTTGGAGCCTGGGCAGGCTTGCTGGGTTCTGCTTTAAGAGCCTTGATTCGTCTTGAATTGGGTC
AACCGGGATCTCTTATAGAAAACGATCAAATCTACAATACTATCGTAACGGCTCATGCTTTCGTAATAATCTTTTTCATG
GTCATGCCTGTAATAATCGGAGGTTTTGGAAATTGATTAGTACCAATGATAATTGGAGCACAAGATATGGCTTTTCCTCG
GATAAACAACATGAGATTTTGGTTACTCCCCCCTTCTTTAACTTTACTGTCTGCTTCTGCTTTTGCTGGTACGGGGGCTG
GTACAGGTTGAACAGTTTACCCTCCCTTAGCTGCAAATATATTCCATTCTGGAATTTCAGTAGATTTAGCCATTTTTAGA
TTACACCTAGCAGGAGCTTCTTCTATCTTAGGAGCAATTAATTTTATTACTACTATCATAAACATACGGTCTTCTTCTAT
GACATTGGACTCAATACCTCTGTTTGTTTGATCTGTTTTAATTACAGCCGTATTACTCTTATTGTCTTTACCAGTCTTAG
CCGGAGCTATCACCATATTATTAACAGACCGTAACTTTAATACTTCTTTTTTTGATCCTTCAGGAGGAGGGGACCCCATT
TTATACCAACACTTGTTC
>GMGLC031-13|Trombidiformes|COI-5P
AACTTTATATTTTATTTTTGGTTTTTGGTCTGGTATTTTAGGTGCTTCCATAAGAATTATTATTCGAATGAAGTTAGCTA
ATCCTGGTTTTATAGGTCAGAATGATCAAATTTATAATGTTATAGTAACAGCTCACGCTTTTATTATAATTTTTTTCATA
GTTATGCCAATTATAATTGGAGGTTTTGGAAATTGATTAGTTCCTTTAATAATTGGAGCTCCTGATATAGCTTTTCCTCG
AATAAATAATATAAGTTTTTGATTATTACCTCCTTCATTAATAATACTATTATTATCTTCTTTTGCTGAAAGAGGGGCAG
GTACAGGTTGAACTGTATATCCTCCTTTATCTAGATATCTATTTCATGGTGGTATTTCAGTAGATTTAACTATTTTTTCT
TTACATATAGCAGGAATTTCATCTATTCTAGGAGCTATTAATTTTATTACTACAATTTTAAATATACGAATAAGTATAAT
AAGATTTGAACGATTACCTTTATTTGTATGATCTGTTCTTATTACTGCTGTTTTATTACTATTATCTTTACCTGTTTTAG
CTGGAGCTATTACTATATTACTAACTGATCGAAATTATAACACTTCTTTTTTTG
>CHACB236-10|Erythraeidae|COI-5P|HQ558486
ATCATTATACTTTATGCTAGGAACCTGATCAGGAGTTATAGGATTGAGAATAAGAATAATTATCCGATTAGAACTAGGCC
AGCCAGGGCAAACAATTGGAAACGAACAACTATATAATTCAATAATTACTTCGCATGCATTTATTATAATTTTCTTTATA
GTCATACCAATTATAATCGGCGGATTCGGAAACTGATTAGTTCCACTGATACTAGGGGCACCCGATATAGCTTTTCCACG
CATGAATAATATAAGATTCTGACTATTACCACCATCTTTGATACTTCTATTAACAGCTTCATTCTCCTCGATAGGAGTAG
GGACTGGATGAACAGTCTACCCCCCTCTTTCAGACTTATGGGGGCACAGCTCATATTCAATTGAAATAACCATCTTTTCA
CTTCACTTAGCAGGAGTCTCTTCCATTCTAGGGGCTATTAATTTCTTAGCTACAATTAAAAATATAAAAAACAAATTCTT
ATCGATAGAGAAAATTCCTCTATTCGTGTGATCAGTAATAGCCACAGCCATTCTCCTTCTTTTATCTTTACCTGTACTAG
CTGGAGCTATTACTATGCTCCTATCCGATCGAAATTTCAACACATCTTTTTTTGATCCTTCTGGGGGGGGAGACCCTATT
CTCTACCAACACCTATTC
>MCCAA617-12|Araneae|COI-5P
TACATTGTATTTTATTTTTGGTGCGTGAGCTGCTATAGTAGGTACAGCTATAAGAGTATTAATTCGTATAGAATTAGGAC
AGTCTGGTGCATTGTTGGGTGATGATCATTTATATAATGTAATTGTTACTGCTCATGCTTTTGTTATAATTTTTTTTATA
GTAATGCCAATTTTAATTGGAGGTTTTGGTAATTGAATAGTTCCTATAATATTAGGTGCAGCTGATATAGCTTTTCCTCG
AATAAATAATTTAAGATTTTGATTATTACCCCCTTCTTTAGTATTATTATTTATTTCTTCTATAGCTGAGATAGGTGTGG
GAGCAGGATGAACAGTTTATCCTCCTCTTGCTTCTAATGTAGGTCATATAGGAAGTGCTATAGATTTTGCTATTTTTTCC
TTACATTTAGCTGGAGCTTCTTCAATTATAGGGGCAGTTAATTTTATTACTACAATTATTAATATGCGTTCGGTAGGTAT
GAGTTTAGAGAAAACTTCTTTATTTGTATGATCTGTTTTAATTACAGCAGTACTTTTATTATTATCTTTACCAGTGTTAG
CTGGTGCTATTACTATATTATTAACTGATCGTAATTTTAATACTTCTTTTTTTGATCCTGCTGGAGGAGGAGATCCTATT
TTATTTCAACATTTATTT
>ARSO394-09|Araneae|COI-5P
TACTTTATATTTAATTTTTGGAGCTTGGGCTGCTATAATAGGAACAGCTATAAGAGTATTGATTCGAATTGAATTAGGTC
AACCAGGAAGATTTATAGGTGATGATCAATTATATAATGTGATTGTTACTGCTCATGCATTTGTAATAATTTTTTTTATA
GTTATACCAATTTTAATTGGAGGATTTGGTAATTGATTAGTTCCTTTAATATTAGGGGCTCCTGATATAGCTTTTCCTCG
AATAAATAATTTGAGATTTTGATTATTACCCCCATCATTATTTTTATTGGTTATTTCATCATTGGTAGAAATAGGAGTAG
GGGCAGGTTGAACAGTATATCCTCCATTGGCTGGATTGGAAGGACATGCAGGTAGATCAGTTGATTTTGCTATTTTTTCT
TTACATTTAGCTGGGGCTTCTTCAATTATAGGAGCAATTAATTTTATTTCAACTATTATTAATATGCGTTTTTACGGAAT
AAGAATAGAGAAGGTTCCTTTATTTGTATGATCAGTATTAATTACTGCTGTTTTATTATTATTATCTTTACCTGTATTAG
CAGGAGCTATTACTATATTATTAACTGATCGAAATTTTAATACTTCTTTTTTTGATCCTTCTGGTGGGGGAGATCCAATT
TTATTTCAGCATTTATTC
>ETKS848-13|Araneae|COI-5P
GACGTTATATTTTATTTTTGGGGCTTGGGCTGCTATAGTTGGAACGGCTATAAGAGTTTTAATTCGTATTGAGTTAGGAC
AACCTGGTAGTTTTTTAGGGGATGATCATTTATATAATGTAATAGTTACTGCTCATGCTTTTATTATAATTTTTTTTATA
GTTATACCTATTTTAATTGGGGGTTTTGGTAATTGATTGGTGCCCCTAATGTTAGGGGCACCAGACATAGCTTTTCCTCG
TATAAATAATTTAAGATTTTGATTATTACCCCCCTCTCTTTTTTTATTATTTATTTCATCTATAGTAGATATAGGAGTGG
GGGCAGGGTGGACTGTCTATCCTCCTTTAGCTTCTTTGGAGGGGCATTCTGGAAGATCAATAGACTTTGCTATCTTTTCT
CTTCATTTGGCTGGTGCTTCTTCTATTATGGGTGCTATTAATTTTATTTCTACGATTTTTAATATACGAGTATTAGGAAT
GAGAATGGAAAAGGTACCTTTATTTGTATGATCTGTTTTGATCACTGCTATTTTATTATTATTGTCTCTTCCAGTTTTGG
CTGGTGCTATTACTATATTATTAACTGATCGAAATTTTAATACTTCTTTTTTTGATCCATCTGGAGGGGGGGACCCAGTA
TTATTTCAACACTTATTT
>SPDCH311-12|Araneae|COI-5P
TACTTTATATTTAATGTTTGGGGCTTGATCTGCTATAGCAGGAACTGCTATAAGAGTATTAATTCGGATAGAATTAGGAC
ATTCAGGAAGATTATTAGGTGATGATCATTTATATAATGTGGTTGTTACGGCTCATGCGTTTGTTATAATTTTTTTTATA
GTTATACCTATTTTAATTGGGGGTTTTGGAAATTGATTGGTACCATTAATATTAGGGGCACCAGATATAGCTTTTCCTCG
AATAAATAATTTAAGCTTTTGATTATTACCCCCTTCATTGTTATTATTATTTATTTCTTCTATAGTTGAAGTAGGAGTAG
GAGCTGGTTGAACTGTTTATCCTCCTTTAGCTTCTACAGTTGGTCATAGAGGAGGAGGAATAGATTTTGCTATTTTTTCA
TTACATTTAGCTGGGGCATCTTCTATTATAGGAGCTGTTAATTTTATTTCTACTATTATTAATATACGTTCTGTTGGTAT
AAGTATAGAAAAGGTATCTTTATTTGTTTGATCTGTATTAATTACGGCTGTTTTATTATTATTATCTTTACCTGTTTTAG
CAGGTGCAATTACAATATTATTGACTGATCGTAATTTTAATACTTCTTTTTTTGACCCTGCTGGAGGGGGTGATCCTATT
TTGTTTCAACATTTGTTT
>GMFIR035-13|Opiliones|COI-5P
GACTATATATATAATTTTTGGAATATGAGCTGCAATAATTGGATCAGCATTAAGAATTTTAATTCGTACTGAACTTGGTC
AGCCAGGATCATTAATAAATGATGACCAAATTTATAATGTTATTGTAACTGCACATGCTTTCGTAATAATTTTTTTTATA
GTTATACCTATTATAATTGGAGGGTTTGGTAATTGATTAGTACCTTTAATACTAGGGGCTCCTGATATAGCTTTTCCACG
ATTAAATAATATAAGTTTTTGATTATTACCCCCCTCATTTTTACTTCTTCTATCTTCTATAATAGTAGAAAATGGGGCTG
GAACAGGATGAACTGTTTATCCCCCTTTATCAAGAAATATTGCGCATACAGGGGCTTCAGTAGATTTAACAATCTTTTCT
TTACACCTAGCTGGTATTTCTTCAATCTTAGGAGCTATTAATTTTATTACTACTATTATTAATATACGAACACAAGGAAT
AATCCTAGAACGTATACCATTATTTGTGTGATCCGTAAAAATTACAGCAATTTTATTATTATTATCTTTACCTGTATTAG
CAGGAGCAATTACAATACTTTTAACAGACCGAAATTTTAATACTTCTTTTTTTGATCCAGCTGGGGGAGGAGACCCT
>MYMCA687-11|Trichoribates|COI-5P|JX836896
AACACTTTACTTTATCTTTGGGGCTTGAGCTGGTTTACTAGGCTCAGCTTTAAGAGGTTTGATTCGTTTAGAACTGGGAC
AGCCTGGTTCACTTATGGAAAATGATCAAATTTACAACACTATTGTAACAGCACATGCTTTTGTAATAATCTTTTTCATG
GTAATACCAGTGATGATTGGAGGGTTTGGAAATTGATTGGTTCCAATAATAATTGGAGCACAAGACATAGCTTTTCCACG
AATAAATAATATAAGATTTTGATTGCTTCCTCCTTCTTTAGCTTTGCTCTCTTCTTCAGCATTCGCAGGAATAGGAGCAG
GTACAGGTTGGACTGTTTATCCTCCTCTAGCAGGCAACCTATTTCATTCAGGATTTTCCGTAGATCTAGCAATCTTTAGC
TTACATTTAGCGGGAGCATCTTCTATTCTAGGAGCTATCAATTTCATTACTACCATTTTGAATATGCGTTCTTCTTCAAT
AACTTTAGACTCAATTCCTTTATTTGTATGATCTGTCTTAATTACCGCAGTTTTACTTCTTTTGTCTTTGCCAGTTTTAG
CCGGTGCTATTACTATATTACTTACAGACCGTAATTTTAATACGTCCTTTTTTGACCCATCCGGAGGTGGAGACCCTATT
TTATACCAACATTTATTT
>ASAAR377-13|Araneae|COI-5P
GACTTTATATTTAATTTTTGGTGCTTGGGCAGCAATAGTTGGTACAGCAATAAGTGTATTAATTCGAATAGAATTAGGAC
AAGTAGGTAAATTTTTAGGTGATGATCATTTGTATAATGTTATTGTTACTGCTCATGCATTTGTCATAATTTTTTTTATA
GTAATACCTATTTTAATTGGTGGATTTGGAAATTGATTAGTTCCTTTAATATTAGGTGCCCCAGATATAGCATTTCCTCG
AATAAATAATTTAAGTTTTTGATTACTTCCTCCATCATTATTATTATTATTTATTTCTTCTATAGTTGAAATAGGAGTTG
GTGCTGGTTGAACAGTTTATCCTCCTTTAGCATCTGCTACAGGTCATGCTGGAAGTGCTGTTGATTTTGCTATTTTTTCA
TTACATTTAGCAGGAGCATCTTCTATTATAGGTTCCATTAATTTTATTTCTACTATTGTTAATATACGATCAAGTGGTAT
AAAAATAGATAAAGTTCCGTTATTTGTATGATCTGTTATAATTACCACTGTATTATTACTTTTATCATTACCTGTATTAG
CAGGTGCTATTACTATACTTTTAACAGATCGAAATTTTAATACTTCTTTCTTTGATCCTGCTGGAGGAGGAGATCCTATT
TTATTTCAACATTTGTTT
>SPICA1219-10|Araneae|COI-5P|JF884782
AACATTATATTTAATATTTGGAGCTTGATCAGCAATAGTAGGAACAGCAATAAGAGTATTAATTCGAATTGAATTAGGTC
AACCTGGAAGTTTTTTAGGAGATGATCAATTATATAATGTAATTGTTACAGCTCATGCTTTTGTAATAATTTTTTTTATG
GTAATGCCAATTTTAATTGGTGGTTTTGGAAATTGATTAGTTCCTTTAATATTAGGAGCTCCTGATATAGCTTTTCCTCG
AATAAATAATTTAAGATTTTGATTATTACCTCCTTCTTTATTATTATTATTTATTTCTTCAATAGTAGAAATAGGAGTAG
GAGCTGGATGAACTGTATATCCTCCTTTATCATCATTAGATGGACATAATGGAAGATCAGTTGATTTTGCTATTTTTTCT
CTTCATTTGGCTGGTGCTTCATCTATTATAGGAGCTGTTAATTTTATTAGAACTATTTTAAATATGCGAGTATATGAAAT
ATCTATAGAAAAAGTTTCTTTATTTGTTTGATCAGTTTTAATTACTGCTGTATTATTATTATTATCATTACCTGTATTAG
CAGGTGCTATTACAATATTATTAACTGATCGAAATTTTAATACTTCATTTTTTGATCCAGCAGGAGGGGGAGATCCTATT
TTATTTCAACATTTATTT
>SPRMA192-10|Araneae|COI-5P|HQ580806
AACTTTATATTTATTATTTGGTTCATGGGCTGCTATAGTAGGAACTGCTATAAGAGTATTAATTCGTATAGAATTGGGTC
AACCTGGAAGATTTATAGGTGATGATCATTTATATAATGTTATTGTAACTGCTCATGCATTTGTTATGATTTTTTTTATA
GTTATACCTATTTTAATTGGTGGGTTTGGAAATTGATTGGTTCCTTTGATATTGGGGGCTCCAGATATAGCATTTCCTCG
CATAAATAATTTAAGTTTTTGATTATTACCTCCTTCATTAATATTATTATTTATTTCGTCTATGGTAGAAATAGGGGTAG
GTGCTGGTTGAACTGTATATCCGCCTTTGGCTTCTAATATAGGTCATTCGGGAAGAGCCATGGATTTTGCTATTTTTTCT
TTACATTTAGCGGGTGCTTCGTCTATTATAGGAGCAATTAATTTTATTTCTACTGTAATTAATATGCGTTCTATTGGAAT
AAGTATGGAGAAGGTTCCTTTGTTTGTATGATCAGTATTTATTACTGCGGTGTTATTATTATTATCTTTACCTGTATTAG
CAGGTGCTATTACTATATTATTAACTGATCGTAATTTTAATACTTCGTTTTTTGACCCTGCTGGGGGAGGGGATCCTATT
TTATTTCAACATTTATTT
>MYMCA993-11|Arctacarus|COI-5P|JX834745
AACAATATATTTAATTTTTAGTTCCTGGGCCGGGATAGTAGGAACTGCATTAAGAATAATTATTCGAATTGAATTAGGCC
AACCCGGATCTTTAATTGGAGATGACCAAATTTATAATGTAATTGTAACCGCACATGCTTTTGTAATAATTTTTTTTATA
GTAATACCTGCTTTAATTGGAGGTTTTGGAAATTGATTAATTCCATTAATAATTTCTGCCCCAGATATAGCCTTTCCCCG
TATAAATAATATGAGTTTTTGATTATTACCCCCCTCTCTCCTTTTTTTATTAGGCTCATCTTTAGTTGAAGCTGGGGCTG
GAACAGGATGGACTGTGTACCCCCCTCTAGCAAGAAATCTCTCCCACAGCGGCGGAGCTGTTGATCTAGCTATTTTTTCT
CTTCATCTAGCCGGTGTATCTTCTATTCTTGGATCCATTAATTTTATTACAACTATTATAAATATGCGTCCTAATAATAT
AATTTTAGAACGAACTCCACTTTTTGTATGATCAGTATTAATTACAACAATTTTATTACTTTTATCATTACCAGTACTTG
CCGGAGCAATTACAATATTATTAACAGATCGTAATTTTAATACTTCATTTTTTGACCCAAGAGGAGGGGGGGATCCAATT
TTGTACCAACATCTCTTT
>ARSO809-10|Araneae|COI-5P|HQ924741
AACTTTATATTTATTGTTTGGAGCTTGATCAGCTATAGTTGGAACTGCAATAAGAGTTTTGATTCGAATAGAATTAGGAC
AGTCTGGTAGATTTTTAGGTGATGATCATTTATATAATGTTGTCGTTACTGCTCATGCTTTTGTTATAATTTTTTTTATA
GTAATACCTATTTTAATTGGTGGGTTTGGAAATTGGTTAGTTCCTTTAATATTAGGAGCTCCTGATATAGCCTTTCCTCG
AATAAATAATTTGAGTTTTTGATTATTACCACCTTCTTTATTTTTATTATTTATTTCTTCTATGGCTGAAATAGGGGTTG
GGGCAGGTTGAACTGTATATCCTCCTTTAGCTTCTAGAGTTGGTCATATAGGAAGAGCTATAGATTTTGCTATTTTTTCC
TTACACTTAGCAGGTGCTTCTTCTATTATAGGGGCTATTAATTTTATTTCTACAATTATTAATATACGTTCTGTTGGAAT
AAGAATGGAAAAAGTATCTTTATTTGTTTGATCTGTTTTAATTACAGCAATTTTATTATTATTATCTTTACCTGTATTGG
CAGGTGCTATTACTATGTTGTTGACTGATCGAAATTTTAATACCTCTTTTTTTGATCCAGCGGGTGGAGGGGATCCAATT
TTATTTCAACATTTATTT
>CNBPL268-13|Sarcoptiformes|COI-5P
AACTCTTTATTTTATCTTCGGAGCTTGATCTGGAATTCTAGGGTCCTCTTTAAGAAGAGCCATTCGTCTAGAACTTTCAC
AATCAGGCACATTTTTAGGAAATGACCAAATTTACAATGTAATTGTAACAGCACATGCTTTTGTAATAATCTTTTTCATA
GTAATACCCATTATAATTGGGGGGTTTGGAAATTGATTAGTTCCCCTAATAATCGGAGCACAAGATATAGCATTCCCGCG
AATAAATAATATAAGATTTTGACTTCTCCCTCCCTCCCTATCACTCCTTTCAATTTCATCTCTTGCCGGATTGGGGGCGG
GAACAGGATGAACAGTTTACCCCCCTCTTGCTGGAAATTTATTCCATCATGGATTTTCAGTAGACCTGGCAATTTTCAGA
TTACATTTGGCAGGGGCTTCTTCAATTCTAGGAGCAATTAATTTCATCTCTACTATCTTCAATATACGAAGAGATAGAAC
AATAATGGAATCCCTTCCTTTATTCGTCTGGTCAGTTTTAATTACCGCAATCCTCCTTTTACTCTCTCTCCCTGTTTTAG
CAGGGGCCCTCACAATACTACTAACAGACCGAAACTTTAATACATCATTTTTCGACCCTTCTGGGGGAGGGGATCCC
>GMGSR650-13|Trombidiformes|COI-5P
CTCCTTATACTTTCTCTTCGGGAGATGATCTGCTTTCGTAGGAACTGCCTTTAGTGTATTGATTCGTTTGGAACTAGGAC
AGCCAGGATCTTTTATTGGGGAAGACCAAACCTATAACGTAATAGTCACCGCCCATGCATTCATTATAATTTTCTTCATA
GTTATACCTATCATGATTGGAGGGTTTGGGAACTGACTAGTACCCCTTATAATCGGGGCCCCAGATATAGCCTTCCCCCG
TATAAACAATATAAGTTTTTGATTACTGCCTCCATCTCTTACATTATTACTTGCTGGAGGATTAGTCGAAAGAGGGGCAG
GAACAGGTTGAACTGTCTACCCTCCCCTTTCCTCTAATATCGCACACGCAGGGGCATCTGTGGACCTCTCAATTTTTAGC
TTACACTTAGCAGGAGCGTCTTCCATCCTAGGGGCTGTAAATTTTATTACCACTATCATTAATATACGAGCACCTGGATT
AACTTGAGACCAAACCCCCTTATTTGTGTGATCTGTGTTTCTCACAGCTATTCTACTTCTTTTATCGCTTCCTGTCCTAG
CAGGAGCTATCACTATACTTCTAACTGACCGAAACCTTAACACCTCATTTTTCGACCCAGCAGGAGGAGGGGACCCTA
>ARONT412-09|Aranielladisplicata|COI-5P|GU682953
TACTTTATATTTGATTTTTGGAGCTTGAGCGGCTATAGTCGGGACCGCAATAAGAGTATTAATTCGAGTCGAGTTAGGAC
AGTCTGGGAGGTTTCTTGGGGATGACCAATTGTATAACGTAATTGTTACAGCTCACGCATTTGTTATAATTTTTTTTATG
GTAATACCAATTTTAATTGGGGGGTTTGGTAACTGGCTGGTTCCCTTGATATTAGGGGCCCCCGATATAGCATTTCCACG
AATGAATAATTTAAGATTTTGACTATTACCTCCCTCTCTTTTTTTATTAATCATTTCTTCAATAGTAGAAATAGGGGTTG
GGGCTGGTTGAACAGTATATCCTCCTCTAGCTGGGTTAGAAGGGCATGCTGGGAGCTCTGTGGATTTTGCTATTTTCTCC
CTTCATTTGGCTGGGGCTTCTTCCATTATAGGGGCCATTAATTTTATTTCAACTATTATCAATATACGATTTTACGGAAT
AAGGATAGAAAAGGTTCCTTTATTTGTTTGATCCGTTCTTATTACAGCTGTTCTATTACTATTATCTCTTCCTGTACTAG
CTGGGGCTATTACTATATTATTAACTGATCGAAATTTTAATACCTCTTTTTTTGACCCGTCAGGAGGAGGGGATCCTATT
TTATTTCAACATTTATTT
>ARONT306-09|Agelenopsispotteri|COI-5P|GU682842
TACTTTATATTTGATTTTTGGTGCTTGGTCTGCAATAGTAGGAACAGCAATAAGAGTTTTGATTCGGATTGAATTAGGTC
AGCCTGGGAGATATTTAGGTGATGATCATCTTTATAATGTTATTGTTACTGCTCATGCTTTTGTTATAATTTTTTTTATA
GTAATACCTATTTTAATTGGAGGTTTTGGGAATTGATTAGTACCTTTGATATTAGGGGCTCCTGATATGGCATTTCCTCG
TATAAATAATTTAAGATTTTGGTTATTACCACCCTCTTTATTTTTGTTATTTATTTCTTCTATAGCTGAGATAGGGGTAG
GTGCAGGTTGGACAGTCTATCCTCCTTTAGCTTCTACTGTTGGTCATGCTGGAAGTTCAGTGGATTTTGCTATTTTTTCT
TTACATTTAGCGGGGGCTTCTTCTATTATGGGAGCTATTAATTTTATTTCTACTATTTTTAATATACGTTCTTATGGAAT
ATCAATGGAAAAAGTTCCTTTATTTGTGTGGTCTGTTTTAATCACAGCTGTTTTACTATTATTATCTTTACCTGTATTAG
CAGGGGCTATTACAATATTATTAACTGATCGAAATTTTAATACATCTTTCTTTGATCCAGCAGGAGGTGGGGATCCAATT
TTATTTCAACATTTGTTT
>SPICH378-09|Bathyphantesbrevipes|COI-5P|GU684257
AACATTATATTTAATTTTTGGGGCTTGGGCAGCTATAGTAGGGACTGCTATAAGAGTATTGATTCGAGTTGAATTAGGTC
AGACGGGAAGAATGTTAGGAGATGACCATTTATATAATGTCATTGTAACGGCGCATGCTTTTATTATAATTTTTTTTATA
GTGATACCTATTTTAATTGGGGGATTTGGAAATTGATTAGTTCCTCTTATATTAGGGGCACCTGATATAGCTTTTCCACG
AATAAATAATTTGAGTTTTTGGCTTTTACCTCCCTCATTATTAATATTATTTATTTCTTCCATAGTTGAAATAGGGGTGG
GTGCTGGGTGAACTGTTTATCCTCCTTTAGCTTCCTTAGAAGGACACTCTGGAAGCTCTGTAGATTTTGCTATTTTTTCA
TTACATTTGGCTGGGGCTTCCTCAATTATAGGAGCTATTAATTTTATTTCTACTATTTTAAATATACGGGCTTATAATAT
TAGCATAGAAAAGGTCTCTTTATTTGTTTGGTCAGTTTTAATTACGGCAGTTCTTTTATTATTATCTTTACCTGTTTTAG
CAGGGGCTATTACTATATTATTGACGGATCGAAATTTTAATACTTCTTTTTTTGATCCTGCGGGAGGAGGAGATCCTGTT
TTATTTCAACATTTGTTT
>ARCN064-10|Trombidiformes|COI-5P|HQ924287
GACACTATACTTTATTTTAGGAGCATGGGCCGGGGTTTTAGGATTAAGCCTAAGCGCAATCATTCGAATAGAATTAAGAC
AACCAGGCCAATTATTTTCCAGAGACCAGACTTACAACTCAATCGTAACCTCACACGCTTTCATTATAATTTTTTTTATA
GTTATACCAATCATAATTGGAGGTTTTGGTAATTGATTAATTCCGATAATAATCGGAGCTCCAGATATAGCCTTCCCACG
AATAAATAATATAAGATTCTGACTACTCCCCCCAGCTTTATCTCTACTTTTAATAGCCTCCTTTTCAACTATAGGGGTCG
GGACAGGATGGACAGTATACCCGCCATTATCTTCTAATTTAGCGCATAGATCCATATCTATCGAAATAACAATTTTTTCA
TTACACTTAGCAGGTGTCTCCTCAATTTTAGGAGCCATCAATTTTTTAGCAACTATCAGCAACATAAAAAGAAAAAATCT
TTCAGCAGAAAAAACACCACTATTCGTAGTGGCAGTTGCCGTCACAGCTGTTTTACTCCTCCTTTCCTTACCAGTTCTAG
CCGGTGCCATCACTATACTTTTAACCGATCGAAACTTTAACACAACCTTTTTTGATCCTTCTGGAGGAGGAGACCCAATT
CTTTACCAACACTTATTT
>HFARA019-10|Araneae|COI-5P|HQ958394
AACTTTGTATTTAATTTTTGGGGTATGATCGGCTATAGTTGGGATAGCTATAAGAGTTTTGATTCGAATTGAATTAGGAC
AATCAGGAAGATTTTTAGGAAATGATCATTTATATAATGTAATTGTTACAGCTCATGCTTTTGTTATGATTTTTTTTATA
GTAATGCCTATTATGATTGGAGGATTTGGGAATTGATTAGTGCCTTTGATATTAGGAGCTCCAGATATAGCTTTTCCTCG
AATAAATAATTTAAGATTTTGATTATTACCTCCTTCTTTAATATTATTATTAATTTCTTCTATAGTAGAAATAGGGGTTG
GAGCTGGATGAACTATTTATCCTCCTTTGGCTTCTGATATAGGGCATCCTGGAAATTCTGTTGATTTTACTATTTTTTCT
TTACATTTGGCTGGTGTTTCTTCTATTTTAGGTGCTATTAATTTTATTTCTACAATTATTAATATACGTTCTATTGGAAT
AAAGATGGAAAAAGTTCCTTTATTTGTTTGATCTATTTTTATTACAGTTATTTTATTATTATTGTCTTTACCTGTATTAG
CAGGGGCTATTACTATATTGTTAACTGATCGTAATTTTAATACTTCTTTTTTTGATCCTGCAGGAGGTGGTGATCCTATT
TTATTTCAACATTTATTT
>SPIAI553-10|Araneae|COI-5P|HM384526
GACTTTATATTTTATTTTTGGAGCTTGGGCTGCCATAGTAGGAACAGCAATAAGAGTATTAATTCGGATTGAGTTAGGAC
AGACTGGAAGATTACTAGGGGATGATCAATTGTATAATGTAATTGTTACGGCGCATGCTTTTGTTATAATTTTTTTTATA
GTTATGCCTATTTTAATTGGGGGTTTTGGTAATTGGCTAGTCCCCTTAATGTTGGGTGCTCCTGATATAGCTTTTCCTCG
AATAAATAATTTAAGATTTTGACTCTTACCCCCGTCCCTATTTTTATTGTTTGTGTCTAGAATAGATGAAATAGGTGTAG
GCGCAGGATGAACTATTTATCCCCCCCTTGCTTCTTTGGAAGGGCATTCTGGGAGATCTATAGACTTTGCCATTTTTTCC
TTGCATTTGGCAGGGGCATCTTCTATTATAGGAGCTATTAATTTTATTTCAACGATTATAAATATACGAAGCTATGGGAT
GACTATAGAAAGGATCCCTTTATTTGTATGGTCTGTACTAATTACTGCTGTTTTATTATTGTTATCTCTTCCAGTTTTAG
CAGGGGCTATTACTATGTTATTAACAGATCGTAATTTTAATACATCTTTTTTTGATCCTTCGGGGGGAGGGGACCCTGTT
TTATTCCAGCATTTATTT
>MYMCG606-12|Oppiidae|COI-5P|JX833687
AACTTTATACTTTATTTTTGGAGCTTGAGCTGGGCTACTCGGTTCCGCGTTAAGTGCCTTAATTCGACTGGAATTAGGAC
AACCTGGATCTTTAATAGAAAATGATCAAATTTATAATACCATCGTTACAGCACATGCTTTTGTCATAATTTTCTTTATA
GTGATACCTGTTATAATCGGAGGGTTCGGGAATTGATTGGTCCCAATAATAATTGGCGCACAAGACATAGCATTCCCCCG
TATAAATAATATAAGATTTTGGCTTCTTCCTCCGTCATTAACTCTTCTATCTGCTTCAGCTTTTGCAGGTGCAGGGGCTG
GAACCGGTTGAACTGTGTACCCTCCCTTGGCTGATGCTTTATTCCATACTAGAATTTCAGTAGATTTAGCCATTTTTAGT
TTACATTTAGCAGGAGCCTCCTCTATTCTAGGAGCCATTAACTTTATCACTACTATCTTCAATATACGATCTTCGTCAAT
ATCCCTAGACTCCATCCCATTATTTGTATGATCTGTACTAATTACAGCAGTCCTGCTTTTACTATCTTTACCTGTTTTAG
CTGGGGCTATCACAATACTTTTAACGGATCGTAATTTTAACACATCATTTTTTGATCCCTCAGGAGGAGGGGACCCCATC
CTCTATCAACACCTATTT
>BBUSE2888-12|Araneae|COI-5P
AACTTTGTATTTAATATTTGGGGTTTGATCTGCTATAGTAGGAACGGCTATAAGAGTTTTAATTCGAATAGAATTAGGAC
ATTCAGGAAGTATACTAGGGGATGACCATTTATATAATGTAATTGTAACTGCTCATGCATTTGTAATGATTTTTTTTATA
GTAATACCAATTTTGATTGGTGGTTTTGGAAATTGATTGGTTCCTTTAATGTTAGGGGCTCCTGATATATCGTTTCCTCG
AATAAATAATTTATCTTTTTGATTACTTCCCCCTTCTTTATTTTTATTATTCATGTCTTCTATAGTTGAAACTGGGGTAG
GGGCAGGATGAACTGTTTATCCCCCTTTAGCTTCTACAACTGGGCATATAGGCAGATCAATAGATTTTGCTATTTTTTCT
TTACATTTAGCTGGTGCTTCTTCTATTATAGGAGCGGTTAATTTTATTTCTACTATTATTAATATACGATTGAATAGAAT
AAGAATAGAAAAGGTTCCTTTATTTGTTTGATCAGTTTTTATTACTGCTATTTTATTGTTATTATCTTTACCTGTTTTAG
CAGGTGCTATTACTATATTATTAACTGATCGAAATTTTAATACTTCGTTTTTTGATCCTGCTGGGGGAGGAGATCCTATT
TTATTTCAACATTTATTT
>SPIEU733-10|Araneae|COI-5P|HQ975314
GACTTTATATTTAATTTTTGGAGCTTGGGCTGCAATAGTGGGAACAGCAATAAGAGTATTAATTCGAATTGAGTTAGGTC
AAACAGGTAGATTTATGGGTGATGATCAATTATATAATGTAATTGTAACGGCTCATGCTTTTGTAATAATTTTTTTTATA
GTAATACCAATTTTAATTGGAGGGTTTGGAAATTGATTAGTTCCATTAATATTAGGGGCACCTGACATAGCATTTCCTCG
AATAAATAATTTGAGATTTTGATTATTACCCCCTTCTTTATTATTATTATTTATTTCGTCTATAGTAGAAATAGGAGTAG
GAGCTGGGTGAACTGTATATCCACCTCTATCATCTTTAGATGGTCACGGTGGTAGATCAGTAGATTTTGCAATTTTTTCT
TTGCATTTAGCTGGGGCTTCTTCTATTATAGGTGCGGTAAATTTTATTTCTACTGTACTCAATATGCGATCTTATGGGAT
GAGAATAGAAAAAGTTCCTTTATTTGTATGATCAGTTCTAATTACTGCTGTGCTATTATTATTATCATTACCAGTATTAG
CAGGTGCTATTACTATATTATTAACTGATCGAAATTTTAATACTTCATTTTTTGATCCTGCAGGAGGAGGTGATCCTATT
TTGTTTCAGCATTTATTC
>MYMCA027-11|Leptus|COI-5P|JX836425
TACTTTATATTTTATTTTAGGAGCCTGATCAGGGATAATAGGGCTCAGCCTAAGAGCCATTATTCGTATAGAGCTAGGGC
AACCAGGTCAAATAATTTCCAATGATCAAATATACAATAGAATTGTTACAGCCCATGCCTTCATTATGATTTTTTTTATA
GTTATACCTATTATAATTGGGGGTTTCGGAAATTGATTAGTACCAATTATGATTGGTGCCCCAGACATAGCATTTCCCCG
TATAAACAATATAAGATTTTGACTTCTCCCCCCTTCACTAATACTTCTAATTTTAGCTTCGTTTGTCAATATAGGAGTAG
GAACAGGATGAACTATATATCCCCCATTATCAAGCTTTTTAGCCCACAGCTACGCTTCTATTGAATTATCCATTTTTTCT
TTACACCTTGCAGGAGCAGCTTCAATTTTAGGAGCAATCAACTTCCTCACCACCTTCAAAAACATAAGCAACAAAAATCT
TTGATGAGATATAATCCCCCTATTCGTATGGGCTATTATAATCACAGTTGTTCTCTTATTGCTGTCTCTTCCAGTATTAG
CAGGAGCAATCACTATACTTCTCATAGATCGTAATTTTAACACTACCTTCTTTGATCCTTCTGGGGGGGGAGATCCTATT
ATATATCAACATTTATTT
>CHACB540-10|Diapterobateshumeralis|COI-5P|HQ558656
AACTTTGTATTTTATTTTTGGAGCGTGAGCTGGGCTTCTAGGGTCAGCTCTAAGAGGTCTAATCCGTTTAGAGCTAGGGC
AACCCGGTTCTCTGATAGAAAACGATCAAATCTACAACACTATCGTAACAGCACATGCTTTTGTTATAATTTTTTTTATA
GTGATACCTGTTATAATTGGGGGGTTCGGTAATTGATTAGTGCCTATAATAATTGGGGCACAAGACATGGCTTTCCCCCG
AATAAATAACATAAGATTTTGGTTACTACCCCCTTCGCTAGCTTTACTTTCTTCGTCAGCTTTTGCAGGAATAGGAGCTG
GGACCGGATGAACAGTTTACCCCCCTTTAGCAGGAAATTTATTTCATTCAGGGTTTGCTGTGGACTTGGCTATTTTTAGA
CTTCATTTAGCAGGAGCCTCTTCGATCTTAGGAGCTATCAATTTTATTACAACAATTTTAAATATACGTTCTTCGTCTAT
AACGTTAGACTCAATTCCTTTGTTCGTGTGATCGGTGCTGATTACAGCTGTTCTATTACTTCTATCCTTACCAGTGTTAG
CTGGTGCTATTACAATGCTCTTAACAGATCGAAACTTCAATACTTCTTTTTTTGATCCTTCTGGAGGAGGAGACCCCATT
CTTTATCAACATTTATTT
>BBUSE2539-12|Araneae|COI-5P
AACTCTTTATTTAATGTTTGGTGTGTGGTCTGCTATAGTTGGAACAGCTATAAGAGTATTAATTCGAATGGAGTTAGGTA
ATTCTGGGAGTTTATTAGGGGATGATCATTTATATAATGTGGTGGTTACCGCTCATGCTTTTGTAATGATTTTTTTTATA
GTTATACCTATTCTTATTGGTGGTTTTGGAAATTGATTAGTTCCGTTAATGTTAGGAGCTCCAGATATATCGTTTCCTCG
GATGAATAATCTTTCTTTTTGATTACTTCCTCCTTCTTTGTTTTTATTATTTATATCTTCTATGGTTGAAATAGGAGTAG
GAGCAGGGTGAACTGTTTACCCTCCTTTATCTTCTAGAGTAGGACATATAGGGAGTTCGATAGATTTTGCTATTTTTTCT
CTTCATTTGGCTGGTGCGTCTTCTATTATAGGGGCGGTTAATTTTATTACTACTATTATTAATATACGGTTGGTAGGAAT
AAGAATAGAAAAAGTTCCGTTGTTTGTTTGATCTGTATTGATTACTGCTATTTTGTTATTACTTTCCTTACCGGTATTGG
CTGGTGCTATTACTATGTTATTAACTGATCGAAATTTTAATACTTCTTTTTTTGATCCAGCTGGTGGAGGAGATCCAATT
TTGTTTCAACATTTATTT
>ERSPI220-09|Centromerussylvaticus|COI-5P
AAGTTTATATTTAATTTTTGGAGCTTGGGCTGCTATGGTTGGAACTGGGATAAGTGTATTGATTCGTGTAGAGTTAGGGC
AAGTTGGAAGAATGTTAGGGGATGATCAATTATATAATGTTATTGTTACTGCTCATGCGTTTGTTATAATTTTTTTTATG
GTTATACCTATTTTAATTGGGGGATTTGGTAATTGATTGGTTCCTTTAATATTAGGGGCGCCAGATATGGCTTTTCCTCG
TATAAATAATTTAAGCTTTTGGTTATTACCACCATCTTTGTTTTTGTTATTTATTTCTTCTATAGTAGAAATGGGGGTGG
GGGCTGGATGAACCATTTATCCTCCGCTAGCTTCTTTAGAGGGGCATTCTGGTAGTTCTGTAGATTTTGCTATTTTTTCT
CTTCATTTGGCGGGGGCGTCATCTATTATAGGGGCAATTAATTTCATTTCTACTATTATTAATATACGAACTTATGGGAT
AGGGATAGAAAGGGTCTCTTTATTTGTTTGGTCTGTATTAATTACAGCAGTCTTGTTGTTATTATCGTTGCCTGTATTAG
CAGGGGCAATTACTATGTTGTTAACAGATCGAAATTTTAATACTTCTTTTTTTGATCCTGCTGGGGGAGGGGACCCTATT
TTGTTTCAACATCTATTT
>MIONT037-09|Sarcoptiformes|COI-5P
AACTTTATATTTTATTTTTGGAGCCTGGGCAGGCTTGTTAGGATCCGCATTGAGAGGAATTATCCGATTAGAATTAGGAC
AACCAGGTTCATTGATAGATAATGATCAAATTTATAATACTGTAGTTACAGCACATGCTTTTGTAATAATCTTTTTTATA
GTGATACCTGTAATGATCGGAGGATTCGGAAATTGATTGGTTCCAATAATAATTGGAGCTCAAGATATAGCTTTCCCACG
AATAAATAACATAAGATTTTGACTTTTGCCTCCATCTTTAGTACTATTATCCACTTCAGCGTTTGCCGGAGCTGGGGTAG
GAACTGGATGAACTGTTTACCCTCCTTTAGCCGGAAATTTGTTCCATTCAGGCTTTGCTGTAGACTTAGCAATTTTTAGT
TTACATCTTGCTGGTGCTTCATCTATCTTAGGAGCTATTAATTTTATCACAACTATTTTAAATATACGCTCCTCCTCTGT
CACCTTAGATTCAATTCCTCTATTTGTATGATCCGTTTTAGTTACAGCAGTATTACTTTTGTTATCACTACCTGTTTTAG
CTGGTGCAATCACTATATTACTAACAGATCGAAATTTTAATACAACATTTTTTGATCCAGCAGGAGGAGGGGATCCTATC
TTATATCAACACCTTTTC
>SSEIB4235-13|Sarcoptiformes|COI-5P
AACTCTTTACTTTATTTTTGGGGCTTGGGCGGGTTTGATAGGCTCTGCCTTAAGAGGCTTAATTCGGCTGGAACTAGGGC
AGCCAGGGTCTCTAATAGAAAATGATCAAATTTATAACACTGTTGTCACAGCCCATGCTTTTGTGATAATTTTTTTTATA
GTGATACCCACTATAATTGGAGGTTTTGGCAACTGGCTGATTCCTATTATAATTGGAGCACAAGACATAGCGTTTCCTCG
CATAAATAATATAAGATTTTGACTATTGCCACCTTCTCTAACTCTTCTATCTTTGTCTGCATTTGCTTCTGCCGGAGTGG
GCACCGGTTGAACGGTTTACCCACCGCTCGCTGGCAATCTTTTTCATTCAGGAATTTCGGTCGATCTCGCTATCTTTAGC
CTCCATTTGGCAGGGGCTTCTTCTATTTTGGGGGCAATTAATTTTATCACAACCATTTTAAATATACGTTCCTCTTCGAT
AACCCTAGACACAGTGCCGTTATTCGCGTGATCTGTTCTAATTACCGCAGTACTCCTTCTTCTTTCCTTACCTGTTTTAG
CAGGAGCCATCACAATATTACTAACAGACCGAAATTTTAATACATCTTTTTTTGATCCTTCCGGAGGCGGGG
>SPICA520-10|Araneae|COI-5P|JF885708
GACTCTTTATTTTATGTTTGGTGCTTGATCTGCTATAGTCGGTACATCTATAAGTGTATTGATTCGAATTGAATTAGGAC
AGCCAGGAAGATTTTTAGGTGATGATCATTTGTACAACGTAATTGTAACTGCCCATGCTTTTGTTATGATTTTTTTTATA
GTAATACCAGTATTAATTGGGGGTTTTGGAAATTGATTGGTTCCTTTAATATTGGGTGCTCCTGATATGGCTTTTCCTCG
AATAAATAATTTGAGATTTTGATTATTACCTCCTTCTTTATTTTTATTATTTATTTCTTCTATAGTAGAAATAGGAGTAG
GAGCTGGGTGAACAATTTATCCGCCTTTAGCGTCTAGAATAGGTCATAGAGGAAGTTCTGTAGATTTTGCTATTTTTTCT
TTACATTTAGCTGGGGCTTCTTCAATTATGGGTGCTATTAATTTTATTTCTACTATTTTTAATATACGATCTGTAGGGAT
GAGAATAGAAAAGGTACCTTTATTTGTGTGATCAATTCTTATTACTGTAGTTTTATTATTATTATCATTGCCTGTTTTAG
CAGGGGCTATTACAATATTATTAACTGATCGAAATTTTAATACTTCCTTTTTTGATCCTGCGGGGGGAGGAGATCCTATT
TTATTTCAACATTTATTT
>CNWLO193-13|Trombidiformes|COI-5P
ACACTATATTTTATTTTGGGGATTTGGGCGGGTATCTTCGGCTTGAGACTAAGCGCTTTAATCCGAATAGAATTAAGCCA
ACCCGGCCAACTGTTCGCCAGAGACCAAACATATAACTCAATTGTCACTTCCCATGCTTTTATTATAATTTTTTTTATAG
TGATACCTATTATAATCGGGGGGTTCGGAAATTGGCTAGTACCAATAATAATTGGCGCTCCGGATATAGCCTTCCCACGG
ATAAACAATATAAGCTTTTGATTACTACCACCATCTTTATCTCTTCTTTTAATAGCTTCCTTCTCATCAATAGGGGTGGG
GACAGGATGAACAATCTATCCTCCTTTATCCGCTAATTTAGCGCATAGCTCAATATCAATCGAAATAACAATTTTTTCTT
TACACTTAGCAGGGGTGTCCTCAATTTTGGGGGCTATTAATTTCCTAGCCACAATTAGCAATATAAAAAGAAAAAATCTA
TCAGCAGAAAAAACCCCTCTGTTTGTAGTTTCAGTCGCTGTGACTGCTATTTTGCTTCTTCTCTCCTTGCCAGTTTTAGC
CGGAGCCATCACAATACTTCTAACTGACCGA
>MYMCF463-12|Anystidae|COI-5P|JX834015
AACAATGTATTTTTTCTTCGGAATGTGAGCAGGAATGTTAGGTGCTGCAATAAGACTTTTAATTCGATTAGAATTAACCC
AACCAGGTTCACTTTTAGAAAATGATCAAATCTATAACACTATTGTAACTGCTCATGCTTTTGTAATAATTTTTTTTATA
GTAATACCTATTATAATTGGAGGATTTGGTAATTGACTAGTCCCTATTATAATTGGAGCTCCAGATATAGCTTTCCCTCG
AATAAATAATATAAGTTTTTGGTTATTACCACCATCTCTTTCTCTTTTAATGTTATCAGCTTTTACCTCGAAAGGTAGAG
GAACTGGATGAACTGTTTATCCTCCTTTATCTAGAAATATATCTCATTCTGGCGCATCTGTAGATTTAACTATTTTTTCA
CTTCATCTTGCTGGAATTAGATCTATTTTAGGTGCTATCAATTTTATAACTACCATTATAAATATAAAAACTCCTCATCT
AAGATTTGAACAAATTCCTTTGTTTGTTTGATCCGTATTCATTACTACTGTTTTACTTTTATTGTCATTACCTGTTTTAG
CAGGTGCTATTACTATACTTTTAACAGATCGTAATTTTAACACTTCTTTCTTTGATCCAGTAGGGGGGGGAGATCCAATT
TTATATCAACATTTGTTT
>ALBSP335-12|Araneae|COI-5P
GACTTTATATTTAATATTTGGGGTTTGGTCAGCTTTAGTTGGAACTGCTATAAGAGTATTAATTCGAATTGAATTAGGAC
AGTCTGGTAGTTTTTTAGGTGATGATCATTTATATAATGTAATTGTTACTGCTCATGCTTTTGTTATAATTTTTTTTATA
GTTATACCAATTATAATTGGTGGTTTTGGTAATTGATTAACTCCTTTAATATTAGGAGCTCCTGATATAGCATTTCCTCG
AATGAATAATTTAAGATTTTGATTATTACCTCCTTCTTTAATTTTATTATTTATTTCATCTATAGTTGAGATAGGTGTAG
GTGCTGGATGAACTATTTATCCTCCTTTGGCTTCAGGAGTAGGTCATTCTGGAGGGTCTGTAGATTTTGCTATTTTTTCT
CTTCATTTAGCTGGAGCTTCTTCTATTATAGGAGCAATTAATTTTATTACTACTATTATTAATATACGATCTGTAGGTAT
AAGAATGGAAAAAGTTCCTTTGTTTGTTTGATCTGTATTTATTACAACAGTGTTATTACTTTTGTCTTTACCTGTATTAG
CAGGTGCTATTACTATGTTGTTAACTGATCGAAATTTTAATACTTCTTTTTTTGATCCTGCTGGAGGAGGAGATCCTATT
TTATTCCAACATTTATTT
>BBUSE2518-12|Araneae|COI-5P
GACTCTATATTTGTTATTTGGGGCATGAGCTGCTATAGTAGGGACAGCTATAAGAGTATTAATTCGAATTGAGTTGGGTC
AACCTGGGAGGTTTATTGGGGATGATCAATTATATAATGTAATTGTTACTGCTCATGCATTTGTAATAATTTTTTTTATA
GTAATACCTATTTTGATTGGTGGATTTGGAAATTGATTAGTTCCTCTAATGTTAGGTGCTCCTGATATAGCTTTTCCTCG
TATAAATAATTTAAGATTTTGGTTACTTCCTCCATCATTATTTTTATTAATTATTTCTTCTATAGTAGAAATGGGGGTGG
GGGCAGGATGAACAGTTTATCCTCCTTTAGCTAGTTTAGAGGGGCATGCCGGTAGTTCAGTGGATTTTGCTATTTTTTCT
TTACATTTAGCGGGTGCTTCTTCTATTATAGGGGCTATTAATTTTATTTCTACTATTATTAATATACGGGCATACGGAAT
AACTATGGAAAAAGTACCTTTATTTGTTTGGTCAGTGTTAATTACTGCTGTATTATTATTATTATCTCTTCCAGTATTAG
CAGGAGCTATTACCATATTATTAACTGATCGAAATTTTAATACCTCGTTTTTTGATCCTTCAGGAGGAGGGGATCCTATT
CTTTTTCAGCATTTGTTT
>CENAM041-12|Araneae|COI-5P
AACTCTTTATTTGGTGTTTGGGGCTTGAGCTGCAATAGTTGGTACTGCAATAAGAGTATTGATTCGAGTTGAATTAGGTC
AGCCAGGTAGATTTATAGGTGATGATCAATTATATAATGTAATTGTAACAGCACATGCATTTGTGATAATTTTTTTTATA
GTAATACCAATTTTAATTGGTGGATTTGGAAATTGATTAGTTCCTTTAATGTTAGGAGCTCCTGATATAGCTTTTCCTCG
AATAAATAATTTGAGTTTTTGATTATTACCTCCTTCATTATTATTATTATTTATTTCTTCTATAGTTGAAATAGGAGTAG
GGGCTGGATGAACTGTATATCCTCCTTTGTCATCATTAGATGGTCATGGTGGAAGATCCGTTGATTTTGCTATTTTTTCT
TTACATTTGGCTGGAGCTTCTTCTATTATAGGGGCTGTAAATTTTATTTCTACTGTATTAAATATACGGTCTTATGGTAT
GACTATAGAAAAGGTTCCTTTATTTGTATGGTCAGTTTTGATTACTGCTGTATTATTATTATTATCTTTACCTGTATTGG
CAGGTGCTATTACTATATTATTGACTGATCGAAATTTTAATACATCATTTTTTGATCCTGCTGGAGGGGGAGATCCAATT
TTGTTTCAACATTTATTT
>CNPAI462-13|Trombidiformes|COI-5P
AACTATATATTTCAGTTTGGGGATTTGATCCGCTGTACTAGGTACATCTATAAGAAATATTATCCGTCTAGAATTAAATC
AACCAGGATCTATATTAGAAAATGATCAAATTTATAACTCAATTGTCACAGCCCATGCTTTTATTATAATCTTTTTTATA
GTTATACCAATTATAATCGGAGGATTTGGAAATTGATTAATTCCTATAATAATAATAACCCCAGATATAGCCTTCCCACG
TATAAATAATATAAGATTTTGACTTTTATTATCCTCATTAGTATTATTAATTTCTTCTATACTATCATCTCAAGGGAGAG
GAACTGGATGAACATTATACCCTCCTTTGTCAAATCAAATCTCTCATTCAGGATCTTCAGTAGACTTAACTATTCTATCG
CTTCACTTAGCTGGAGCATCATCAATTATAAGATCTTTAAATTTTATTATTACTATTATTAATATAAAACCTAATAGTAT
AACACTAGAACAAGTTCCATTATTTGCTTGAAGAGTACTAATTACCGCTATTTTATTATTGCTAGCATTACCAGTTTTAG
CTGGAGCTATCACTATACTTCTAACAGATCGAAATTTCAATACATCTTTCTTTGATCCAAGTGGGGGGGGAGA
>BBUSS172-09|Araneae|COI-5P|HM428810
AACTTTATATTTACTTTTTGGAGTTTGATCAGCTATGGTTGGTACAGCTATAAGTGTTTTAATTCGTATAGAATTAGGTC
GTCCTGGAAGATTTTTAGGTGATGATCATTTATATAATGTAATAGTAACTGCTCATGCTTTTGTAATAATTTTTTTTATA
GTTATGCCAATTTTAATTGGTGGGTTTGGAAATTGATTAGTTCCTTTAATATTAGGAGCTCCGGATATATCATTTCCTCG
AATAAATAATTTATCTTTTTGACTTTTACCTCCTTCTTTATTTTTATTATTTATTTCTTCTATAGTTGAAGTAGGAGTGG
GAGCAGGATGAACTGTTTATCCTCCGTTAGCTTCTACTGTAGGTCATATAGGAAGATCAATGGATTTTGCTATTTTTTCT
TTACATTTAGCGGGGGCTTCTTCAATTATAGGGGCTATTAATTTTATTTCTACTATTATTAATATGCGTTCGGTTGGTAT
AAGAATAGAAAAGGTACCTTTATTTGTTTGATCAGTATTTATTACTGCTATTTTATTATTATTATCTTTACCTGTTTTAG
CAGGAGCTATTACTATATTATTAACTGATCGAAATTTTAATACTTCTTTTTTTGATCCTGCTGGGGGAGGAGATCCAATT
TTATTTCAACATCTTTTT
>MYMCC424-11|Cyta|COI-5P|JX835129
ATCCTTATACTTTCTATTTGGAAGATGAGCAGCCCTCTTAGGAACATCTTTAAGTGTCCTAATTCGAATAGAATTATCTC
AACCAGGATCAATAATAGAAAACGACCAAATTTATAATACAATTGTTACTGCCCACGCTTTCATTATAATTTTTTTTATA
GTAATACCAATTATAATTGGAGGATTTGGAAATTGATTAATTCCACTAATAATCGGATCACCAGATATAGCTTTTCCTCG
GATAAATAATATAAGCTTCTGACTTCTACCCCCCTCTTTAACCCTTTTAATTCTATCCAGATTTTCAGATAATGGAGCGG
GAACAGGGTGAACTGTTTACCCTCCCCTATCAACTAATATATTCCATACTGGCGCATCTGTTGATTTAACAATTTTCTCT
CTTCATCTAGCAGGAGTTTCATCAATTCTAGGGGCTATTAACTTCATTACTACTATTATCAATATACGAAGTCCCTTAAT
ATCTTTTGAACGTATTCCATTATTTGTATGATCAGTTTTTATCACTGTTATTCTCCTACTTCTATCCCTACCAGTATTAG
CTGGAGCCATCACAATGTTATTAACAGACCGTAATTTCAATACTTCATTCTTTGACCCAATCGGAGGAGGAGATCCAATC
CTATACCAACACTTATTC
>ARBCM711-13|Opiliones|COI-5P
TACAATATATATAATTTTTGGTATATGAGCTGCAATAGTTGGAACTGCCCTAAGAATGCTAATTCGCACAGAACTAGGGC
AACCCGGCTCCTTAATAAATGATGACCAAATTTATAATGTCATTGTAACAGCCCATGCTTTTGTAATAATTTTTTTCATA
GTCATACCTATTATAATTGGAGGATTCGGTAACTGGCTAGTACCTTTAATATTAGGGGCCCCCGATATAGCTTTCCCACG
CTTAAACAATATAAGATTTTGACTTTTACCCCCTTCATTTCTTTTATTATTATCCTCTGCTTTAGTAGAAAATGGGGCAG
GGACAGGCTGGACCGTTTACCCTCCCCTATCTAGAAATATTGCACATACGGGGGCATCTGTAGATTTAACAATTTTCTCC
TTGCACTTAGCGGGTGTTTCTTCTATTCTTGGAGCCATTAACTTTATTACAACCATCATTAATATACGAACACAAGGAAT
AATTTTAGAACGAATACCCCTCTTTGTATGGTCAGTAAAAATTACAGCAATCCTATTACTACTTTCTCTACCAGTCCTGG
CAGGTGCCATCACTATACTACTAACAGATCGAAATTTTAATACCTCCTTCTTCGACCCAGCCGGAGGAGGTGACCCCATC
TTATACCAACATCTATTT
>SSBAB1222-12|Trombidiformes|COI-5P
AACAATATACTTTGCATTTGGTCTGTGATCTGCTTTGTTAGGAGCCTCAATAAGAATTTTAATTCGAATGGAACTAGGGC
AACCAGGTTCAATAATGCAAAATGATCAAATTTATAACACAATTGTCACTGCTCATGCATTCGTAATAATCTTTTTCATA
GTAATACCAATTATAATTGGAGGATTTGGTAATTGACTAGTGCCAATAATAATTGGAGCACCAGACATAGCTTTTCCACG
AATAAATAACATAAGCTTTTGACTTCTCCCTCCTTCATTATCTTTACTTTTAATATCTGCTTTCACCAGAGCTGGAGTGG
GAACAGGTTGAACAGTTTATCCACCATTATCTAGCAACATTGCTCATCCCGGAGGAGCAGTAGATTTAGGAATCTTCTCT
CTACATCTAGCAGGAATTTCTTCAATCCTAGGAGCAATTAATTTCATAACTACAATTATTAACATACGATCCCCTGCTAT
ATCTTTTGAGCGAATTCCATTATTTGTCTGATCAGTATTTATTACAGCTTTATTACTCTTACTTTCTCTACCTGTACTAG
CAGGAGCCATTACAATACTATTAACAGATCGAAATTTTAACACATCTTTCTTTGACCCTGCAGGAGGAGGAGACCC
>SSJAD2954-13|Sarcoptiformes|COI-5P
AACTTTATATTTTATCTTTGGGGCATGAGCCGGTCTTTTAGGATCAGCGTTAAGAGCCCTAATCCGACTAGAACTAGGTC
AACCAGGTTCTTTAATAGAAAACGATCAAATCTACAATACTATTGTCACTGCACATGCTTTTGTAATAATTTTTTTTATA
GTTATGCCAGTAATAATTGGAGGATTTGGTAATTGATTAGTTCCTATGATGATTGGAGCACAAGACATAGCTTTCCCTCG
GATAAATAACATAAGATTTTGGTTACTTCCCCCCTCGTTAACTCTTTTGTCAGCTTCAGCTTTCGCTGGGATAGGAGCTG
GTACTGGTTGGACAGTGTATCCACCATTAGCTGGTAATTTATTTCATTCAGGATTTTCTGTAGATTTAGCCATTTTTAGA
CTTCATTTAGCAGGTGCCTCCTCTATTTTAGGTGCTATCAACTTTATCACTACTATTATAAACATACGTTCTTCTTCAAT
AACTTTAGACTCTATCCCGTTATTTGTTTGGTCAGTGCTAATTACAGCTGTTTTATTACTACTATCTCTTCCGGTTTTAG
CAGGAGCTATCACCATGCTACTAACAGACCGAAATTTTAATACTTCCTTTTTTGATCCTGCTGGAGG
>BBUSE2323-12|Araneae|COI-5P
AACATTATATTTGTTATTTGGAGCTTGATCAGCTATAGTAGGGACTGCAATAAGAGTAATAATTCGAATTGAATTAGGAC
AACCTGGAAGTTTTTTCGGAGATGATCAGTTATACAACGTGGTAGTTACTGCTCATGCTTTTGTAATGATTTTTTTTATA
GTGATGCCTATTTTAATTGGAGGTTTTGGAAATTGATTAGTTCCTATAATATTAGGAGCTCCTGATATAGCTTTTCCTCG
AATAAATAATTTAAGTTTTTGGCTTCTTCCTCCTTCTTTATTATTATTATTTATTTCTTCAATAGTAGAGATAGGAGTAG
GAGCAGGATGAACTGTTTATCCTCCTTTGTCTTCTTTAGAAGGGCATGCTGGAAGATCAGTGGATTTTGCTATTTTTTCT
CTTCATTTAGCTGGTGCTTCTTCTATTATAGGAGCTATTAATTTTATTTCTACCATTTTAAATATACGTTCTCAAGGGTT
GAGATTAGAAAAAATTTCTTTATTTGTGTGATCAGTTTTAATTACTGCAGTATTATTACTATTATCATTACCTGTTTTAG
CGGGTGCTATTACTATGTTACTTACAGATCGTAATTTTAATACTTCTTTTTTTGATCCGGCTGGAGGAGGAGATCCAATT
TTATTTCAACATTTATTT
>SPIRU784-11|Araneae|COI-5P|JN310257
AAGTTTATATTTTATTTTTGGAGCTTGGGCTGCTATAGTAGGTACAGCAATAAGAGTATTAATTCGAGTTGAATTGGGGC
AAGTTGGTAGTTTGTTAGGAGATGATCAGTTATATAATGTTATTGTTACTGCTCATGCTTTTGTTATAATTTTCTTTATA
GTTATACCTATTTTAATTGGAGGGTTTGGAAATTGATTGGTTCCTTTAATGTTAGGGGCCCCTGATATGGCTTTCCCTCG
TATAAATAATTTAAGATTTTGGTTATTACCCCCTTCTTTATTATTATTATTTATTTCTAGTATGGATGAAATAGGGGTAG
GAGCAGGATGGACTGTGTATCCCCCTCTTTCTTCTTTAGAAGGACATTCTGGAAGATCAGTGGATTTTGCTATTTTTTCT
TTACATTTGGCTGGGGCATCATCAATTATGGGAGCTATTAATTTTATTTCAACTATTTTAAATATACGAGGGTATGGTAT
AACTATAGAAAAGGTTCCTTTATTTGTTTGATCTGTATTAATTACAGCTGTATTATTATTATTATCTTTGCCTGTTTTGG
CAGGTGCTATTACTATACTTTTAACAGATCGAAATTTTAATACATCATTTTTTGATCCTGCTGGGGGAGGGGATCCTGTT
TTATTTCAACATTTATTT
>CHACB930-10|Neogymnobatesluteus|COI-5P|HM907357
AACTTTATATTTTGTATTTGGAGCTTGAGCTGGTTTACTAGGATCAGCATTAAGAGGTTTAATTCGATTAGAGCTAGGAC
AACCAGGCTCTCTTATAGAAAACGACCAAATTTACAACACTATTGTAACGGCACATGCCTTCGTCATAATTTTTTTTATA
GTTATACCTGTAATAATTGGAGGGTTCGGAAATTGATTAGTTCCTATGATGATTGGAGCACAAGACATAGCTTTCCCACG
AATAAACAACATAAGTTTTTGATTATTACCTCCTTCTCTAACTTTACTTTCTTCTTCGGCTTTTGCAGGGATAGGAGCCG
GTACAGGATGAACAGTATACCCTCCTTTATCAGGAAACTTATTTCACTCTGGATTTTCTGTAGACTTAGCTATTTTTAGC
CTTCATTTAGCGGGTGCTTCTTCTATTTTAGGAGCTATCAATTTTATTACCACTATTTTAAATATACGTTCATCATCTAT
AACGTTAGACTCAATTCCTTTATTTGTATGATCTGTTTTAATTACAGCAGTTCTTTTATTACTATCTCTTCCTGTTCTAG
CGGGAGCTATCACGATATTGTTAACAGACCGTAATTTTAATACTACCTTTTTTGATCCTTCTGGAGGAGGGGATCCTATC
TTATATCAACATCTTTTT
>TURAR963-10|Araneae|COI-5P|HQ983100
AACTTTGTATTTGATTTTTGGATCTTGGGCAGCTATAGTAGGGACAGCTATAAGAGTCTTGATTCGAATTGAATTAGGTC
GTCCTGGAAGTTTTTTGGGGGATGATCATTTATATAATGTTATTGTTACAGCACATGCTTTTGTTATAATTTTTTTTATA
GTAATGCCAATTTTGATTGGTGGATTTGGAAATTGGTTAGTGCCTTTAATATTGGGGGCGCCTGACATGGCTTTTCCTCG
TATAAATAACTTAAGTTTTTGATTGTTACCCCCTTCTTTATTATTGTTGTTTATTTCTTCTATGTCTGAAATAGGAGTAG
GGGCTGGTTGAACTGTTTATCCGCCTTTAGCTTCTATTATAGGTCATGCTGGTAGATCAGTGGACTTTGCTATTTTTTCT
TTACATTTAGCTGGGGCTTCTTCTATTATAGGGGCTATTAATTTTATTTCTACTATTATTAATATACGTACATGGGGAAT
AACAATGGAAAAAGTTCCTTTGTTTGTTTGGTCGGTTTTAATTACAGCAATTTTATTATTGTTATCTTTGCCTGTATTAG
CGGGTGCTATTACTATATTACTTACTGATCGTAATTTTAATACTTCGTTTTTTGATCCTGCGGGGGGAGGGGATCCTATT
TTATTTCAACATTTATTT
>CNRMA1082-12|Trombidiformes|COI-5P
AACTATATATTTTTTGTTTAGTTTATTTTCAGGATTAATAGGGACATCAATAAGAATAATTATTCGAATAGAATTAATAA
CTCCAGGTTCACTAATTCAAAATGATTTTATTTATAACTCTATAGTTACTACTCATGCAATAATTATAATCTTTTTTATA
GTTATACCAGCAATAATTGGAGGATTTGGAAATTGATTAATTCCAATAATAGTAAACACTGTAGATTTATGTTTTCCACG
AATAAATAATATAAGTTTTTGACTTTTAATTCCTTCTTTAATATTAATAGTTAGTTCTTCTATAAAAAGAGTTATAAATG
GGGTAGGTTGAACTATATACCCTCCATTAACTTCTATCCAATATTTTATATCATCTTCAATTGAAATAATAATTTTTTCT
CTTCATATTGCAGGTCTTTCATCAATTGCTAGATCTATTAACTTTATTTCAACAATTTTATTAATAAAAAACAAGAATTT
TTTTTTAAGAAATTTAACATTATTTACTTTATCAATTTTAATTACTACTTTTTTACTTCTTCTAGCCTTACCTGTATTAG
CAGGTGCAATCACAATAATTTTAATAGATCGAAATTTTAATACATCATTTTTTGATCCTAGCGGAGGAGGAG
>SPICA1892-11|Araneae|COI-5P|JN309688
AACTTTATATTTAATTTTTGGGGCTTGAGCGGCTATAATTGGTACAGCTATAAGAGTGTTAATTCGAGTTGAGTTAGGTC
AGCCTGGGAGATTTATAGGTGATGATCAGCTTTATAATGTTATTGTAACTGCACATGCGTTTGTTATAATTTTTTTTATA
GTAATACCTATTTTAATTGGCGGGTTTGGCAATTGATTGGTTCCTTTAATGTTGGGAGCTCCTGATATAGCATTTCCTCG
AATAAATAATTTAAGATTTTGGTTACTTCCCCCGTCTTTATTTCTTCTGATTGTATCTTCTATAGTTGAGATGGGTGTTG
GTGCAGGTTGAACTGTATACCCCCCCTTAGCTGGTCTTGAGGGGCATGCCGGTAGATCTGTAGATTTTGCAATTTTTTCT
TTACATTTAGCTGGGGCGTCGTCTATTATGGGGGCTATTAATTTTATTTCTACAATTATAAATATACGATTTTACGGAAT
AACTATAGAAAAAGTTCCATTATTTGTATGATCTGTATTAATTACTGCAGTTTTATTATTACTTTCTTTACCGGTTTTGG
CTGGTGCTATTACTATATTATTAACTGACCGAAATTTTAATACATCGTTTTTTGACCCTTCCGGGGGAGGGGATCCTATT
TTATTTCAGCATTTATTT
>SPICH382-09|Lepthyphantesalpinus|COI-5P|GU684244
GTCTTTATATTTTATTTTTGGTGCTTGAGCTGCTATAGTGGGGACGGCTATAAGAGTTTTAATTCGAATTGAGTTAGGAC
AAACAGGAAGAATGTTAGGGGATGATCAACTTTATAATGTTATTGTTACAGCACATGCTTTTGTTATAATTTTTTTTATA
GTTATACCTATTTTAATTGGGGGATTTGGAAATTGGTTAGTTCCTTTAATGTTGGGTGCCCCTGATATAGCTTTTCCTCG
CATAAATAATTTAAGATTCTGACTACTACCCCCTTCTTTACTGTTATTATTTATTTCAAGAATAGTAGAAATAGGGGTGG
GGGCAGGGTGAACTGTATACCCCCCTCTTGCTTCTTTGGAAGGTCATGCTGGTAGTTCTGTCGATTTTGCTATTTTTTCT
TTACATCTAGCAGGAGCCTCTTCTATTATAGGGGCTATCAATTTTATTTCTACTATTATTAACATACGAGGGTATGGTGT
AACTATGGAAAAAGTTCCACTTTTTGTGTGATCTGTTTTAATTACGGCTGTTCTATTACTTTTATCCCTCCCGGTTTTGG
CAGGGGCAATTACAATATTATTAACAGATCGAAATTTTAACACTTCTTTTTTTGATCCAGCGGGTGGAGGAGATCCTGTT
TTATTCCAACATTTATTT
>CNROH051-13|Araneae|COI-5P
ACTTTATATTTATTATTTGGTGCTTGGGCTGCAATAGTTGGTACAGCAATAAGAGTTTTAATTCGTATTGAATTGGGACA
AACGGGAAGATTTTTAGGTGATGATCAATTATATAATGTAGTAGTAACTGCTCATGCTTTTATTATAATTTTTTTTATAG
TGATACCTATTTTAATTGGAGGTTTTGGAAATTGATTAGTTCCTTTAATATTAGGAGCTCCGGATATAGCTTTTCCTCGT
ATAAATAATCTTAGTTTTTGGTTATTACCTCCTTCTTTATTATTATTATTTATTTCTTCTATAGTAGAAATAGGGGTAGG
GGCTGGATGAACAGTTTATCCTCCTCTTTCTTCTTTGGAAGGTCATGCTGGTAGATCGGTTGATTTTGCTATTTTTTCTC
TTCATTTAGCTGGTGCTTCTTCAATTATAGGAGCTATTAATTTTATTTCAACTATTTTAAATATACGTTTATTTGGAATA
AAAATAGAGAAGGTATCTTTATTTGTATGGTCAGTTTTAATTACTGCTGTTTTATTACTTCTTTCTTTACCTGTATTAGC
TGGTGCTATTACAATATTATTAACTGATCGAAATTTTAATACT
>SPICH781-09|Islandianaholmi|COI-5P|GU684380
AAGTTTGTATTTTATTTTTGGGGCTTGGGCTGCTATAGTAGGAACAGCAATGAGTGTATTAATTCGAATTGAGTTAGGAC
AAATTGGAAGATTATTAGGAGATGATCAATTGTATAATGTAATTGTTACGGCGCATGCTTTTGTTATAATTTTTTTTATA
GTTATACCTATTTTGATTGGAGGTTTTGGAAATTGATTAGTTCCTTTAATGTTAGGGGCACCTGATATAGCATTCCCTCG
TATAAATAATTTAAGATTTTGGTTATTGCCCCCTTCTTTATTATTATTATTTATTTCTAGAATAGATGAAATAGGGGTTG
GAGCAGGATGAACTGTGTATCCTCCCCTTGCTTCTTTGGAGGGACATCCAGGAAGTTCTGTGGATTTTGCTATTTTTTCT
TTACATTTAGCTGGAGCATCTTCGATTATAGGGGCTATTAATTTCATCTCTACTATTTTAAATATACGCGGATATGGGAT
AACAATAGAAAAGGTTCCTTTATTTGTATGGTCTGTTTTAATTACAGCTGTGTTATTATTATTATCTTTACCTGTGTTAG
CAGGTGCTATTACCATGCTTCTTACTGATCGAAATTTTAATACTTCATTTTTTGATCCTTCTGGGGGGGGGGATCCGGTT
TTATTTCAACACTTATTT
>BBUSA1222-10|Araneae|COI-5P|HQ930908
AACTTTGTATTTACTATTTGGAGCATGATCTGCTATAGTTGGGACTGCTATAAGAGTGTTGATTCGAATGGAGTTAGGAA
ATTCTGGAAGATTATTAGGAAATGATCATTTATATAATGTAATTGTTACTGCTCATGCTTTTGTAATAATTTTTTTTATA
GTTATACCAATTTTGATTGGTGGATTTGGAAATTGATTAGTACCTTTGATATTAGGGGCACCTGATATATCTTTCCCACG
TATGAATAATCTATCTTTTTGATTACTTCCGCCTTCATTGTTTTTATTATTTATATCATCTATGGTCGAAATAGGAGTAG
GAGCAGGGTGAACTGTTTATCCTCCTTTGGCATCTAGTGTAGGACATATAGGAAGATCTATGGATTTTGCTATTTTTTCT
CTTCATTTAGCTGGTGCTTCGTCTATTATAGGGGCTGTAAATTTTATTTCTACTATTATTAATATACGAAGTCAAGGTAT
AAGAATGGAAAAGGTACCTTTATTTGTTTGATCTGTATTAATTACTGCTATTTTACTATTATTGTCTCTTCCTGTTTTAG
CTGGGGCTATTACTATGTTATTGACTGATCGTAATTTTAATACTTCATTTTTTGATCCTGCTGGAGGAGGGGATCCTATT
TTATTTCAACATTTATTT
>SPICH822-09|Improphantescomplicatus|COI-5P|GU684438
AACGTTATATTTTATTTTTGGGGCTTGAGCTGCTATAGTAGGGACTGCCATAAGAGTGTTAATTCGAATTGAATTGGGAC
AAACAGGAAGAATGTTAGGGGATGACCAATTGTATAATGTAATTGTTACGGCGCATGCGTTTGTTATAATTTTTTTTATG
GTTATACCTATTTTAATTGGAGGGTTTGGAAATTGGCTTGTGCCTTTAATGTTAGGGGCTCCCGATATAGCTTTTCCTCG
TATAAATAATTTAAGATTTTGATTATTACCCCCTTCGTTATTGTTGTTATTTATTTCTAGTATAGTAGAAATAGGAGTGG
GGGCAGGATGAACAGTTTATCCTCCTCTCGCTTCTTTAGAAGGACATTCTGGGAGATCTGTAGATTTTGCAATTTTTTCT
TTACATTTAGCTGGAGCTTCTTCAATTATGGGGGCTATTAATTTTATTTCTACTATTATTAATATGCGAGGATACGGAGT
TTCTATAGAAAAAGTTCCTTTATTTGTATGATCTGTTTTAATTACGGCTGTATTATTGTTATTGTCTTTACCTGTGTTAG
CAGGTGCTATCACTATATTGTTAACTGATCGTAATTTTAATACCTCTTTTTTTGATCCAGCTGGGGGGGGTGATCCTGTT
TTATTTCAACATTTGTTT
>SAMIT070-08|Trombidiformes|COI-5P
GACTTTATATTTTGCCTTTGGCGCTTGGGCTGGAATAGTGGGGGCCTCAATGAGAATATTAATTCGATTTGAATTAGGCC
AACCTGGGGCTTTTATTGGTAATGATCAGATTTATAATGTCTTAGTGACTGCGCATGCTTTTGTAATAATCTTTTTTATG
GTAATACCAATGATAATTGGTGGTTTTGGTAACTGGTTAGTACCTCTTATAATTGGTTCTCCAGATATGGCATTTCCTCG
AATAAACAATATAAGTTTTTGGTTACTTCCCCCCTCTCTTACTTTACTGTTACTCTCTTCTTTAGTAGGTGTTGGGGTGG
GGACAGGTTGAACTGTTTACCCTCCCCTCTCAATAAATATTGCTCATGGCGGTATTTCTGTGGATTTGTCGATTTTTTCT
CTACACTTAGCTGGAATTTCTTCTATTTTGGGGGCAGTTAATTTTATGGCTACTATTATTAATATGAAAAGAGTATATAT
AAAATTTGAGCAGATTCCTTTGTTTGTATGATCTGTTTTTATTACAGCCATTTTATTACTTCTCTCACTACCGGTTTTAG
CTGGCGCTATTACTATGCTATTAACTGATCGGAATTTTAATACCTCTTTTTTCGACCCTGCTGGAGGGGGGGACCCTATT
TTATTCCAGCACTTGTTT
>TDWGB354-10|Mesostigmata|COI-5P
AACAATATATTTAATTTTTGCAGCTTGAGCAGCCATACTAGGAACTGCTATAAGAATAATTATTCGAACTGAATTAAGTC
AACCTGGATCTCTTATTGGAGACGACCAAATTTATAACGTTACAGTAACAGCTCATGCTTTTATCATAATTTTTTTTATA
GTTATACCAGCTTTAATTGGGGGGTTTGGAAACTGATTAACCCCTCTAATAGTAATAGCTCCTGACATAGCTTTTCCCCG
TATAAATAATATAAGTTTTTGACTTCTCCCCCCCGCTTTAATCCTTCTTCTAAGATCTTCTTTAGTCGAATCAGGGGCAG
GGACAGGCTGAACAGTCTACCCCCCCTTAGCTAGAAATCTATATCACAGAGGGAGAGCTGTCGATCTAACGATTTTCTCC
TTACACCTCGCAGGTGTATCCTCCATCTTAGGGTCAATTAACTTTATTACTACTATTATAAATATACGCCCAGCAAGTAT
AAATATAGAACGGGTCCCTCTATTCGTATGGTCTGTTCTTATTACTACAATCTTATTACTACTATCTCTACCAGTATTAG
CTGGGGCCATTACAATACTTTTAACGGACCGAAATTTTAACACAACATTTTTTGACCCAAGTGGGGGAGGAGATCCTATC
CTCTACCAACATTTATTT
>SPICR1091-11|Araneae|COI-5P
AACTTTGTATTTCATTTTTGGAGCTTGAGCTGCCATGGTTGGTACAGCTATAAGAGTTTTAATTCGAATTGAACTTGGAC
AAACAGGTAGAATACTAGGAGATGATCAATTGTATAATGTAATTGTTACAGCTCATGCCTTTGTAATAATTTTTTTTATA
GTTATACCAATTTTAATCGGGGGGTTTGGTAATTGGCTAGTACCTTTAATGTTGGGGGCTCCTGATATAGCTTTTCCTCG
GATGAATAACTTAAGTTTTTGATTATTACCTCCTTCTTTATTCTTATTATTTATTTCTTCTATGGCTGAAGTAGGTGTGG
GAGCTGGGTGAACAGTTTATCCTCCTTTGTCTTCTTTGGAGGGTCATTCAGGGAGTTCTGTTGATTTTGCTATTTTTTCT
TTACATTTAGCTGGAGCATCTTCAATTATGGGGGCTATTAATTTTATTTCTACTATTCTAAATATACGGTCTTATGGTGT
TAGAATGGAGAAGGTTTCTTTATTCGTTTGATCTGTTTTAATTACTGCTGTACTGTTATTGTTATCTTTACCTGTTTTAG
CAGGGGCTATTACTATGTTGTTAACTGATCGAAATTTTAATACATCTTTTTTTGACCCTGCGGGGGGAGGTGATCCTATT
TTATTTCAACATTTATTT
>BBCAN272-09|Araneae|COI-5P|GU683176
AATTTTGTATTTAATTTTTGGAGCTTGATCTGCTATAGTAGGAACAGCTATAAGAGTATTAATTCGTATTGAGTTGGGAC
AACCGGGAAGATTATTAGGAGATGATCATTTATATAATGTAGTAGTTACTGCTCATGCTTTTGTTATGATTTTTTTTATA
GTGATACCAATTTTGATTGGTGGTTTCGGGAATTGATTGGTGCCTTTAATGTTAGGGGCTCCAGATATAGCATTTCCTCG
AATGAATAATCTAAGATTTTGACTTTTACCCCCTTCTTTATTTTTATTATTTATTTCTTCTATAGCTGAAATAGGTGTAG
GGGCTGGTTGAACTATTTATCCACCTCTAGCTTCCAGAATAGGACATTCTGGAAGCTCTGTGGATTTTGCTATTTTTTCT
TTACATTTAGCTGGTGCTTCTTCAATTATAGGTGCTATTAATTTTATTTCTACTATTATTAACATACGTTCTTACGGGAT
AAGTATAGAAAAAGTTCCTTTGTTTGTTTGGTCTGTTTTAATTACGGCTGTATTATTATTATTATCTTTACCTGTTTTAG
CGGGTGCTATCACTATATTATTAACTGATCGAAATTTTAATACTTCTTTTTTCGATCCAGCTGGAGGAGGGGATCCTATT
TTATTTCAACATTTGTTT
>SSPAA8007-13|Sarcoptiformes|COI-5P
AACTCTCTACTTTTTATTCGGAACCTGAGCCGGAATTATAGGCTCAGCCTTAAGAGCTCTAATTCGATTGGAGTTAGGGC
AACCAGGTTCTATAATAGAAAATGACCAAATTTATAATACTATCGTAACAGCTCATGCTTTTGTTATAATCTTTTTTATG
GTTATACCTGTAATAATTGGAGGGTTCGGTAATTGACTTGTACCCATAATAATTGGAGCACAAGATATAGCCTTTCCACG
TATAAATAATATAAGATTTTGGCTACTTCCTCCTTCTCTCACGTTACTTTCGGCTTCTGCTTTTGCAGGAATAGGAGCCG
GAACCGGCTGAACCGTTTATCCTCCTCTGGCCGGAAATTTATTTCACTCAGGAATTTCTGTTGATTTGGCTATCTTTAGA
CTTCATCTAGCAGGAGCTTCTTCAATTTTAGGAGCCATTAACTTTATCACTACCATCATAAATATACGATCTTCTACTAT
GTCTTTAGATTCAATTCCACTATTTGTATGGTCTGTTTTAATTACTGCAGTACTCTTATTATTATCATTACCAGTCTTAG
CGGGAGCTATCACAATACTACTTACAGACCGAAATTTTAATACTTCATTTTTTGATCCAACCGGAGGAGGGG
>HFARA005-10|Araneae|COI-5P|HQ958380
AACTTTATATTTAATTTTTGGTGTATGATCTGCTATAGTAGGGATAGCAATAAGAGTATTGATTCGAGTTGAATTAGGAC
AATCTGGAAGATTTTTAGGGGATGATCATTTATATAATGTAGTAGTTACAGCTCATGCTTTTATTATAATTTTTTTTATA
GTTATACCTATTATAATTGGGGGATTTGGAAATTGATTAATTCCTTTAATATTAGGGGCTCCTGATATAGCTTTTCCTCG
TATAAATAATTTGAGATTTTGATTATTACCTCCTTCATTATTATTATTGTTTATTTCTTCGATAGTTGAAATAGGGGTAG
GAGCAGGATGGACTATTTATCCTCCTTTAGCTTCTATAATAGGACATACTGGTTTGGCAGTAGATTTTGCTATTTTTTCT
TTACATTTAGCGGGGGCTTCTTCTATTATAGGGGCTATTAATTTTATTTCTACTATTATTAATATACGTTCATATTCAAT
AAGAATAGAGAAAATTTCTTTATTTGTTTGATCAATTTTTATTACTGTAATTTTATTATTATTATCTTTACCTGTTTTAG
CAGGAGCGATTACTATATTATTAACAGATCGAAATTTTAATACTTCTTTTTTTGATCCTGCAGGGGGTGGGGATCCTATT
TTATTTCAACATTTATTT
>MYMCG483-12|Tectocepheus|COI-5P|JX838034
AACGCTATATTTTATGTTAGGTGCTTGAGCAGGGATTTTAGGTTCTGCCTTGAGTGGTTTAATTCGTTTAGAATTAGGAC
AACCTGGCTCCTTGTTTGAAAATGATCAGATTTATAATACTGTTGTTACATCTCATGCTTTTGTGATAATTTTTTTTATA
GTGATACCTGTGATAATTGGAGGATTTGGAAACTGACTGGTGCCTATAATAATTGGAGCTCAAGACATAGCATTCCCTCG
TATAAATAATATAAGATTTTGGCTTCTGCCTCCCTCCCTAATCCTTTTGTTAAGTTCTTCTTTTGGGGGGATAGGCGTAG
GGACCGGTTGAACGGTTTACCCACCTTTAGCTGGAAATTTATTTCATTCTGGTATTTCTGTAGACCTGGCTATTTTTAGT
TTACATCTTGCTGGAGCTTCTTCTATTCTTGGTGCTATTAACTTTATCACTACTGTTATTAACATACGTTCCTCATCTAT
AAGATTGGATAGTATTCCTCTTTTTGTTTGGTCTGTGTTAATTACAGCAGTTCTGTTGCTTTTATCTTTACCTGTTCTTG
CTGGGGCAATTACTATGCTATTGACGGACCGAAATTTCAACACATCCTTCTTTGACCCTTCTGGGGGTGGGGATCCTATT
TTGTATCAACATCTCTTT
>CHACA843-09|Mesostigmata|COI-5P|GU702811
GACTATGTATTTTATTTTTGGGAGATGGGCGGGGCTCTTAGGATCTTCCTTAAGATCTCTTATTCGACTAGAGCTAGCTC
AACCTGGGGGTTTAATTGGAAATGATCAAATCTACAATACTATTGTGACAGCCCATGCATTCGTAATAATCTTTTTTATA
GTGATACCAGTAATAATTGGTGGATTGGGAAACTGATTAGTACCAATAATAATAGGAGCACAGGATATATCATTCCCTCG
AATAAATAACATAAGATTTTGATTATTACCCCCGTCTCTATCTTTGTTATGTATATCATCATTAGCTGGAAGCGGAGTAG
GAACTGGTTGAACCGTCTACCCACCTTTAAGAAGTTATGGATTTCATTCAGACTATTCGGTTGACCTGGCAATTTTCAGA
TTGCATCTAGCTGGTATTTCTTCAATTTTAGGGTCTATCAACTTCATCTCTACTATTATGAATATGCGAGTCCCATCTCT
ACAATTAGAAATAATCCCCCTATTCGTGTGATCGGTATTAATCACTACAGTTTTGTTGCTTCTATCATTACCGGTGTTGG
CGGGTGCCATCACAATGCTTTTAACAGATCGAAATTTTAACACATCATTTTTTGACCCTAGTGGGGGTGGGGATCCAATT
TTATACCAACATCTATTC
>HFARA111-10|Araneae|COI-5P|HQ958475
AACATTATATTTAATTTTCGGGGTATGATCATCAATAATTGGTACGGGAATAAGAGTATTGATTCGAATAGAATTAGGTC
ATTCTGGAAGTTTATTAGGAGATGATCATTTATATAATGTAATAGTTACTGCTCATGCTTTTGTAATAATTTTTTTTATA
GTTATACCAATTTTAATTGGTGGATTTGGAAATTGATTAATTCCATTAATATTAGGAGCGCCTGATATATCATTTCCTCG
AATGAATAATTTATCATTTTGATTGCTCCCCCCATCTTTATTTTTATTATTAATATCTTCAATAGTAGAAATAGGAGTAG
GAGCTGGATGAACAGTTTATCCACCTTTAGCTTCTAGAGTAGGTCATATAGGAAGATCTATAGATTTTGCTATTTTTTCT
TTACATTTAGCAGGTGCTTCTTCTATTATAGGGGCAGTAAATTTTATTTCTACTATTATTAATATACGAATATTAGGAAT
AAGATTAGAAAAAATTCCTTTGTTTGTTTGATCAGTTCTTATTACAGCTGTATTATTACTTTTATCATTACCAGTGTTAG
CTGGTGCTATTACTATATTACTTACTGATCGTAATTTTAATACTTCGTTTTTTGATCCTGCTGGGGGAGGTGACCCAATT
TTATTTCAACATTTATTT
>MYMCB471-11|Rhagidiidae|COI-5P|JX837691
GACAATATACTTTGCTTTCGGGTTATGATCTGCCCTATTAGGAGCCTCTATAAGAATCTTAATTCGAATAGAATTAGGTC
AACCCGGTTCAATAATACAAAATGACCAAATTTATAATACAATTGTGACAGCCCATGCTTTTGTAATGATTTTTTTCATG
GTAATACCAATTATAATTGGAGGATTTGGTAATTGACTTGTTCCAATAATAATTGGAGCACCAGATATAGCCTTCCCACG
AATAAATAACATAAGCTTCTGACTACTTCCACCTTCACTATCTTTACTCCTAATGTCCGCCTTTACTAGTGCTGGGGTAG
GAACAGGTTGAACAGTTTACCCTCCACTTTCTAGAAACATTGCTCATCCTGGAGGAGCAGTAGATTTGGGAATTTTTTCT
CTTCATTTAGCAGGAATTTCTTCAATTTTAGGAGCAATCAATTTTATAACCACAATTATTAATATACGATCTCCAGCTAT
ATCCTTCGAACGAATTCCATTATTCGTTTGATCAGTATTCATTACAGCTCTATTGTTATTACTTTCTCTACCTGTATTAG
CAGGAGCCATTACAATATTATTAACGGATCGAAATTTCAATACATCTTTTTTTGACCCTGCTGGGGGAGGAGACCCTATT
TTATATCAACACTTATTT
>SPICA1507-10|Araneae|COI-5P|JF885085
TACATTATATTTAATTTTTGGAGCTTGAGCTGCAATAGTAGGTACAGCAATAAGTGTACTGATTCGAATGGAGTTAGGAC
AAGTAGGCTCTTTTTTAGGAAATGATCATTTATATAATGTTATTGTTACTGCGCATGCATTTATTATAATTTTTTTTATG
GTTATACCTATTTTAATTGGAGGATTTGGAAATTGATTGGTTCCTTTAATATTAGGTGCTCCAGATATAGCATTTCCTCG
AATAAATAATCTTAGTTTTTGGTTGTTACCTCCGTCGTTAGTATTATTATTTATTTCTTCAATAGTTGAGATAGGAGTTG
GAACGGGTTGAACTGTTTATCCTCCTCTTGCATCTATAATGGGACATGCTGGAAGTGCAGTTGATTTTGCTATTTTTTCT
TTACATTTAGCTGGGGCTTCTTCAATTATAGGATCAATTAATTTTATTTCTACAATTATAAATATACGCTCAGGTGGGAT
AAAAATAGATAAAATTTCTTTATTTGTATGATCAGTAATAATTACAACTGTATTATTGTTGTTATCACTTCCAGTTTTAG
CTGGAGCAATTACTATACTTTTAACTGATCGTAATTTTAATACGTCTTTTTTTGACCCTGCAGGGGGAGGTGATCCTATT
TTATTTCAACATTTATTT
>CHACC194-10|Oribatella|COI-5P|HQ941520
AACACTTTATTTTATTTTTGGGGCTTGAGCTGGCCTGTTAGGGTCAGCCTTAAGAGGACTAATTCGGCTAGAACTAGGGC
AACCAGGATCGTTAATAGAAAATGATCAAATTTACAATACTATCGTTACAGCCCATGCTTTTGTAATAATTTTTTTTATA
GTGATACCAGTAATAATTGGAGGATTCGGAAATTGGTTAGTTCCAATGATAATTGGAGCCCAAGATATGGCATTTCCACG
CATAAACAATATAAGATTTTGGCTACTTCCTCCTTCTTTAGCACTTTTATCTTCTTCTGCTTTTGCAGGTATAGGAGCAG
GTACGGGATGAACAGTATACCCCCCATTAGCAGGAAATTTATTTCATTCTGGAATTTCTGTAGATTTAGCTATTTTTAGT
CTTCATTTAGCTGGAGCTTCTTCAATTCTAGGAGCTATTAATTTTATTACTACTATTCTTAACATACGCTCTTCTTCAAT
ATCTTTAGATTCAATCCCTTTATTTGTTTGATCAGTATTAATTACTGCTATTTTGCTACTTCTATCCCTTCCAGTTCTAG
CAGGTGCAATTACGATACTTTTAACAGATCGAAACTTTAATACTTCTTTTTTTGATCCTTCTGGGGGTGGGGACCCTATT
TTATACCAACACCTTTTT
>PHSEP1959-11|Araneae|COI-5P
TACTTTATATTTAATTTTTGGTGCTTGATCTGCTATAGTAGGAACTGCTATAAGAGTATTAATTCGAATGGAATTAGGAC
AATCTGGAAGATTTTTAGGTGATGATCATTTATATAATGTGGTTGTTACTGCTCATGCTTTTGTTATAATTTTTTTTATA
GTTATACCTATTTTAATTGGTGGATTTGGTAATTGATTAGTTCCTTTAATGTTAGGGGCTCCTGATATGGCTTTTCCTCG
AATGAATAATTTAAGTTTTTGGTTACTTCCTTCTTCTTTATTATTATTATTTATTTCTTCTATAGCAGAAATAGGAGTGG
GAGCTGGATGAACTGTTTATCCCCCATTATCTTCTAGTGTTGGACATATAGGAAGAGCTGTGGATTTTGCTATTTTTTCT
TTACATTTAGCTGGTGCTTCATCTATTATAGGGGCTGTTAATTTTATTTCGACTATTATGAATATACGTTGTGTTGGAAT
GACTTTTGAAAGGGTTCCTTTATTTGTTTGATCTGTATTAATTACTGCTATTTTATTATTATTATCTCTTCCTGTTTTAG
CAGGAGCTATTACTATATTATTAACAGATCGTAATTTTAATACTTCATTTTTTGATCCTGCAGGTGGAGGAGATCCAATT
TTATTTCAACATCTATTT
>CHACA999-10|Phthiracaridae|COI-5P|HM405857
CACTTTATATTTATCTTTCGGAATGTGAGCAGCGTTAATAGGGACATCTCTTAGATCCATCATCCGGTTTGAGTTAGGTA
CAATAGGAGCCACAACAGGAAGGGACCAAATTTATAACGTATCAGTCACATCCCACGCCCTCACCATAATTTTCTTCATA
GTTATACCAATTATAATTGGGGGGTTCGGTAATTGACTTATCCCTCTAATAATCGGTTCTCAAGACATAGCTTTTCCACG
AATAAATAATATAAGATTTTGGCTACTCCCACCATCCCTACTCCTCCTAATCTCTTCATCATTTAGTGGTGCGGGAGTGG
GGACAGGTTGGACAATTTACCCGCCTCTATCTAGAATATTATTCCACTCAGGGTTTAATGTAGACCTAGCCATTTTCAGA
TTACACTTAGCGGGGGCGTCTTCAATCCTTGGAGCAATTAACTTTATTTCAACTATCGTTAACATAAAATCTAACTACAT
TAGGTTTGAATGCATACCCCTTTTCATTTGATCCGTGTTTATCACAGCCATTCTCCTGTTACTCTCACTACCAGTTTTAG
CTGGAGCTATTACTATATTATTAATAGACCGAAACTTCAACACTACCTTCTTTGACCCGTCGGGAGGTGGAGACCCAATT
CTATTTCAACACCTGTTC
>BBUSE052-11|Araneae|COI-5P
TACTTTATATTTTGTTTTTGGGGCTTGGGCGGCTATAGTAGGAACAGCTATAAGAGTATTAATTCGAATTGAGTTGGGTC
AATCTGGGAGATTTATTGGAAATGATCAATTATATAATGTAATTGTTACGGCTCATGCTTTTGTTATAATTTTTTTTATG
GTTATGCCTATTTTAATTGGGGGTTTTGGAAATTGATTAGTTCCATTAATATTAGGAGCACCTGATATAGCATTTCCTCG
AATAAATAATTTGAGTTTTTGATTGCTTCCACCTTCTTTATTTTTATTGATTATTTCGTCAATGGTAGAAATAGGAGTAG
GAGCTGGGTGAACAGTATATCCGCCTTTAGCAAGATTAGAGGGTCATGCAGGAAGGTCTGTAGATTTTGCAATTTTTTCA
TTACATTTAGCTGGGGCTTCTTCGATTATAGGGGCTATTAATTTTATTTCAACAATTATTAATATACGATTTTATGGTAT
AACAATGGAAAAGGTTCCCTTATTTGTTTGGTCAGTATTAATTACTGCTGTGCTACTTTTACTTTCTTTACCTGTATTGG
CCGGGGCTATTACTATATTACTAACTGATCGAAATTTTAATACTTCTTTTTTTGATCCTTCTGGGGGCGGAGATCCTATC
CTATTTCAGCATTTGTTT
>ARSO047-08|Araneae|COI-5P
AACTTTATATCTATTGTTTGGAGCTTGAGCTGCTATAGTGGGAACTGCTATAAGAGTATTGATTCGAATTGAGTTAGGGC
AACCTGGAAGATTTTTAGGTAATGATCAAATATATAATGTTATAGTAACGGCTCATGCGTTTGTTATGATTTTTTTTATA
GTAATACCGATTTTAATTGGAGGATTTGGAAATTGGTTAGTTCCTTTAATATTAGGAGCTCCTGATATAGCTTTTCCTCG
AATAAATAATTTAAGATTTTGATTATTACCTCCTTCTTTATTATTGTTGTTTATTTCTTCTATAGTTGAAATAGGTGTGG
GGGCAGGATGAACTATTTATCCTCCTTTGGCTTCTGTGGTCGGTCATTCAGGAAGATCTGTGGATTTTGCTATTTTTTCT
TTACATTTAGCTGGAGCTTCTTCAATTATAGGAGCTATTAATTTTATTTCAACTATTATTAATATACGGATAGAAGGAAT
GAGAATAGAGAAAGTTCCTTTATTTGTTTGATCTGTTTTAATTACTGCTGTCCTTCTATTATTGTCCCTTCCAGTTTTAG
CTGGAGCTATTACAATATTGTTAACTGATCGAAATTTTAATACATCTTTTTTTGATCCTGCGGGGGGTGGTGATCCAATT
TTATTTCAACATTTATTT
>MAPTH214-13|Ixodida|COI-5P
TACAATATATTTAATTTTTGGTGCATGAGCAGGAATACTAGGATTAAGTATGAGAATATTAATTCGACTCGAATTAGGTC
AACCAGGTAGATTAATTGGCAATGATCAAATTTATAATGTAATTGTAACTGCCCACGCATTTATTATAATTTTTTTTATA
GTAATGCCTATTATAATTGGGGGATTTGGAAATTGACTTGTTCCTATTATACTAGGGGCCCCTGATATAGCTTTTCCACG
TATAAATAATATAAGATTTTGACTTCTTCCACCTTCTTTATTTCTGTTAATTAATTCATCTTTAGTTGAATCAGGTGCAG
GAACTGGATGAACTGTTTATCCACCCTTATCATCAAATTTATCTCATTATGGGCCCTCTGTTGATTTAGCCATTTTTTCT
CTTCATCTAGCTGGTGCATCATCAATTTTAGGGGCAATTAATTTTATTACAACTATTTTAAATATACGTTCCATTGGTAT
ATCAATAGAACGTATGCCTTTATTTGTGTGGTCTGTTTTAATTACAGCTATTCTTCTGTTGTTATCTTTACCTGTTTTAG
CAGGTGCTATTACCATACTATTAACAGATCGAAACTTTAATACTTCATTTTTTGACCCTTCAGGTGGGGGGGATCCAATT
TTATATCAACATTTATTT
>SSJAF7355-13|Parasitidae|COI-5P
AACTATATACTTAATTTTTGCAGCTTGAGCCGGAATATTAGGAACCGCTCTAAGTATAATTATTCGGGCAGAACTTGGTC
AACCTGGATCTCTAATTGGAGATGACCAAATTTATAATGTAGTTGTAACAGCACATGCTTTTATTATAATTTTCTTTATA
GTTATGCCAGCCTTAATTGGAGGGTTTGGTAATTGACTTGTCCCTTTAATAGTGTCTGCTCCAGATATAGCTTTCCCCCG
AATAAATAATATAAGTTTCTGACTACTACCCCCATCCCTCCTTCTATTACTAAGCTCTTCTATAGTAGAATCCGGAGCTG
GAACTGGCTGAACAGTCTACCCGCCTTTAGCAGGAAATCTCTCTCATAGAGGAGGAGCTGTAGATCTAGCAATTTTTTCT
CTTCATTTAGCCGGTATTTCTTCAATCTTAGGATCTATTAATTTTATTACTACTATTATAAATATACGACCAAAAGAAAT
AACCATGGAACGAATACCTCTATTTGTGTGATCAGTTTTTATCACAACCATTCTTCTTCTCTTATCTCTACCTGTTTTAG
CAGGAGCAATTACAATACTTCTTACAGATCGTAATTTTAACACCTCATTCTTTGACCCCAGAGGGGGAGGGGACCCAATT
>ARONT317-09|Tegenariaagrestis|COI-5P|GU682859
AACTTTGTATTTGGTATTTGGGGCTTGGTCTGCTATAGTTGGAACAGCTATAAGAGTTCTTATTCGAATTGAGTTAGGTC
AACCTGGTAGATTTTTGGGTGATGATCATTTATATAATGTTATTGTTACTGCTCATGCTTTTATTATAATTTTTTTTATA
GTTATACCAATCATGATTGGTGGGTTTGGTAATTGATTAGTTCCTTTAATATTGGGAGCTCCAGATATAGCTTTTCCTCG
TATAAATAATTTAAGTTTTTGATTGTTACCGCCTTCTTTGATTATATTGTTTATTTCTTCTATAGTTGAGATAGGTGTTG
GGGCTGGGTGAACTATTTATCCTCCTTTAGCTTCTTCTATTGGTCATTTTGGTAGATCTGTTGATTTTGCTATTTTTTCT
TTGCATTTGGCTGGGGCTTCTTCTATTATAGGTGCTATTAATTTTATTTCTACTATTTTTAATATACGATCTGTTAGAAT
AACTATAGAGAAGGTTCCTTTATTTGTATGATCTGTTTTAATTACTGCTGTTTTGTTATTATTGTCTTTACCTGTATTAG
CTGGTGCTATTACTATATTATTAACTGATCGAAATTTTAATACTTCTTTTTTTGATCCTGCTGGGGGAGGAGATCCTATT
TTATTTCAGCATTTATTT
>SAMIT301-10|Trombidiformes|COI-5P|HM382905
AACTTTATATTTTGCCTTTGGAGCATGATCAGGAATAGTTGGGGCCAGCCTTAGAAGCCTCATTCGTCTTGAATTAGGGC
AACCAGGAAGACTGATATTTAACGATCAAGTTTATAACACTATTGTCACAGCTCATGCTTTCATTATAATTTTCTTTATA
GTTATACCAATAATAATTGGTGGTTTTGGAAACTGACTATTACCTATAATATTAAGAGCACCAGATATAGCTTTCCCTCG
AATAAATAATATAAGATTTTGACTATTACCTCCTTCTATCACTCTTCTTTTGTCAAGATCATTTACATCTATAGGAGCTG
GAACAGGGTGAACTGTATACCCACCTTTATCAAGAAACATTGCTCATTCGGGACCATCTGTGGATTTAGCAATTTTTTCT
CTTCATTTAGCAGGAGTTTCTTCTATCTTAGGGGCTATTAATTTTATAGCAACAACTATTAATATAAAACCAACATCAAT
AAAAACAGATAAAATTCCTCTATTTGTTTGATCAATTTTTATCACAACCATTTTATTACTTCTTTCATTACCAGTATTAG
CCGGAGCTATTACAATACTCCTAACAGACCGAAATTTTAATACTTCATTCTTCGACCCTGCTGGGGGAGGGGACCCAATC
TTATACCAACATCTATTT
>MYMCG034-12|Eupelopsseptentrionalis|COI-5P|JX837987
AACTTTATATTTCGTTTTCGGAGCTTGGGCAGGAATTCTTGGGTCTGCTTTAAGAGGATTAATTCGATTGGAGTTAGGAC
AACCTGGTTCACTTTTAGAAAATGATCAAATTTATAACACTATTGTAACAGCTCATGCTTTCGTAATGATTTTTTTTATA
GTTATACCCATTATAATTGGAGGGTTCGGAAATTGATTAGTACCTATAATAATTGGTGCACAAGATATAGCATTTCCACG
GATAAATAATATAAGATTTTGGCTTTTACCACCATCATTAGCACTTCTGTCATCTTCGGCATTTGCTGGTATAGGAGCAG
GCACAGGTTGAACAGTATATCCTCCCTTAGCAGGAAATTTATTTCATTCAGGAATTTCTGTTGATTTGGCTATTTTTAGC
CTTCATCTAGCGGGAGCCTCCTCAATTTTGGGAGCAATTAACTTTATTACCACAATTTTAAACATGCGTTCGTCTTCTAT
AACTTTAGACTCTATTCCATTATTTGTATGATCAGTACTAATTACAGCAGTGCTTTTGTTACTATCCTTACCTGTCTTAG
CAGGTGCTATTACTATACTACTTACAGATCGTAATTTTAACACATCTTTTTTTGATCCCTCAGGAGGAGGAGATCCTATT
CTTTATCAACATTTATTT
>CARSP161-10|Araneae|COI-5P|HM906156
TACATTATATTTAGTATTTGGAGCTTGGGCGGCTATGGTGGGCACTGCTATAAGAGTTTTAATTCGGGTGGAATTAGGGC
AGCCTGGAAGATTTATTGGGGATGATCAACTATATAATGTAGTTGTTACTGCTCATGCTTTTGTAATAATTTTTTTTATG
GTGATACCTATTCTTATTGGGGGGTTTGGAAATTGATTAGTTCCTTTAATACTAGGAGCTCCTGACATGGCCTTTCCTCG
AATAAATAATTTGAGATTTTGACTTTTACCTCCTTCTTTGTTCTTATTGATTATTTCATCCATAGTAGAGATAGGGGTAG
GAGCAGGATGAACGGTTTACCCTCCTTTGTCAAGTTTGGAAGGACATGCTGGGAGATCTGTGGATTTTGCCATTTTCTCT
TTACATTTGGCAGGAGCTTCTTCTATTATGGGGGCTATTAATTTTATTTCTACAATTATTAACATGCGATTTTATGGAAT
GACTATAGAGAAGGTTCCTTTATTTGTTTGGTCCGTTCTTATTACAGCAGTATTATTATTATTATCATTACCTGTACTTG
CAGGGGCTATCACGATATTATTAACTGATCGAAATTTCAATACTTCTTTTTTTGACCCTTCAGGGGGAGGTGATCCTGTT
CTCTTCCAACATTTATTT
>GBADC079-10|Tetragnathaextensa|COI-5P|HQ956739
AAGTTTATATTTTTTATTCGGTGTTTGATCTGCCATAGTAGGGACAGCTATAAGAGTTTTGATTCGAATCGAATTAGGAC
AATCTGGAAGATTTTTAGGTGATGATCAGTTGTATAATGTTATTGTCACCGCCCACGCTTTTGTTATAATTTTTTTTATG
GTTATACCTATTTTAATTGGGGGTTTTGGAAATTGGCTAGTTCCTTTGATGTTGGGGGCACCTGATATAGCTTTTCCTCG
AATAAATAATTTAAGTTTCTGACTTTTACCTCCCTCACTCTTTATATTATTTATTTCATCTATGGTGGATGTAGGAGTTG
GAGCGGGCTGAACTGTCTATCCTCCTTTAGCATCTTTGGATGGGCATTCAGGGGGATCTGTGGATTTTGCTATTTTTTCT
CTTCATTTGGCTGGGGCTTCTTCTATTATAGGAGCCATTAATTTTATTTCCACTATTATTAATATGCGGATAAGAGGGGT
TTCTATAGAAAAGGTTCCATTATTTGTGTGATCTGTATTAATCACTGCGGTGTTGCTACTTTTATCCCTTCCAGTTTTAG
CTGGGGCTATCACCATATTGTTAACTGACCGAAATTTTAATACTTCTTTTTTTGATCCTTCTGGTGGGGGAGATCCGGTG
CTTTTCCAACATTTATTT
>ARONT621-10|Phidippusaudax|COI-5P|HQ924486
AACATTATATTTGATTTTTGGAGCTTGGGCTGCAATAGTTGGTACTGCAATAAGTGTATTGATTCGAATAGAATTGGGTC
AAACTGGATCATTTATAGGAAATGATCATATATATAATGTAATTGTGACTGCTCATGCTTTTGTTATAATTTTTTTTATA
GTAATACCTATTATGATTGGAGGATTTGGAAACTGATTAGTTCCTTTAATATTAGGTGCTCCTGATATGGCTTTTCCTCG
TATAAATAATTTGAGATTTTGATTATTACCCCCTTCTTTATTTTTATTATTTATTTCTTCCATAGCTGAGGTAGGTGTAG
GGGCTGGTTGGACAGTTTATCCACCTTTGGCCTCTATTGTTGGGCATAATGGAAGATCAGTAGATTTTGCTATTTTTTCA
TTACATTTAGCTGGTGCTTCATCAATTATAGGAGCTATTAATTTTATTTCTACAATTATTAATATACGTTCTTTAGGAAT
GTCTTTAGATAAAATTCCTTTGTTTGTTTGATCTGTAATAATTACTGCAGTTTTGTTATTACTTTCTCTTCCTGTATTAG
CTGGGGCTATTACTATATTGTTGACTGATCGTAATTTTAATACTTCTTTTTTTGATCCAGCAGGAGGAGGGGATCCTATT
TTATTTCAGCATTTATTT
>BCPB166-09|Mesostigmata|COI-5P
AACTCTTTATATTATATTTTCTCTCTGAGCAGGTTTTATTGGAACAGCATTAAGAATAATTATTCGAATCGAATTAGGTC
AACCAGGTTCTTTTATTAATAATGATCAAATCTACAATACAATTATTACCTCTCATGCATTTATTATAATTTTTTTTATA
GTAATACCTGCTATAATTGGAGGATTTGGAAATTGATTAATCCCAATTTTTTTAAGAGCACCAGACATAGCATTTCCTCG
TCTTAATAATATAAGATTTTGATTACTTATTCCATCTTTCTCATTTCTTATTTTATCCTCATTTATTGAAAGAGGTGTAG
GAACAGGATGAACTGTATATCCTCCTCTTTCAAGTAATATTTCTCACAGAGGATGTTCTGTTGATATCGGAATTTTTAGT
CTTCATCTAGCTGGAGCTAGAAGAATTTTAGGAGCAGTAAACTTTATTACAACAATTTTAAATATACGTCCAAAAAATTT
ATCAATAGAAAAAATATCACTATTTATCTGATCTGTTTTTATTACAGCTATTCTTCTTCTTTTAAGACTTCCAGTACTAG
CAGGTGCTATTACTATATTATTAACAGACCGAAATTTTAACACATCTTTTTTTGATCCTAGAGGAGGTGGAGATCCTATT
TTATATCAACACTTATTT
>BBCAN977-10|Cyclosaconica|COI-5P|HQ928191
TACTTTATACTTGATTTTAGGGGCTTGAGCTGCTATAGTAGGCACTGCTATGAGTGTATTAATTCGAATTGAACTTGGAC
AGTCGGGGAGATTTATTGGAGATGATCAACTGTATAATGTAATTGTAACAGCTCATGCATTTGTAATAATTTTTTTTATA
GTAATACCTATTTTGATTGGTGGATTTGGGAATTGACTGGTACCTCTAATATTAGGTGCTCCAGATATAGCTTTTCCTCG
TATAAATAATTTAAGATTTTGATTATTACCCCCTTCATTATTTTTATTAATTATTTCCTCTATAGTAGAAATAGGGGTAG
GTGCAGGATGAACAGTATATCCTCCTCTAGCTGGGTTAGAGGGACATGCTGGGAGATCAGTAGATTTTGCAATTTTTTCT
CTTCATTTGGCTGGGGCTTCTTCTATTATGGGGGCTATCAATTTTATTTCAACAATTATTAATATGCGATTTTATGGAAT
AACAATAGAGAAAGTTCCATTATTTGTATGATCTGTATTAATTACTGCTGTTTTATTATTATTGTCTCTTCCAGTATTAG
CCGGGGCTATTACTATACTATTAACAGATCGAAATTTCAATACGTCTTTCTTTGATCCATCGGGTGGAGGGGACCCTATT
TTATTTCAACATTTATTT
>SPICR904-11|Araneae|COI-5P
TACTTTATATTTATTATTTGGTTCATGATCAGCTATAGTTGGTACGGCTATAAGAGTAATTATTCGTATGGAATTGGGAC
AGGTTGGAAGATTGTTGGGTGATGATCATTTATATAATGTTATTGTAACGGCGCATGCATTTATTATAATTTTTTTTATA
GTAATACCAATTTTAATTGGTGGGTTTGGTAATTGACTGATTCCTCTAATATTAGGTGCTCCTGATATGGCTTTTCCTCG
TATAAATAATTTGAGTTTTTGATTGTTACCTCCTTCATTAATTTTATTATCCATCTCTTCTATAGCTGAAATAGGGGTGG
GTGCTGGGTGAACTGTGTATCCTCCTCTAGCTTCTAGAGTAGGACATTCTGGTAGTGCTATAGATTTTGCTATTTTTTCT
TTGCATTTGGCTGGTGCTTCTTCTATTATAGGGTCAATTAATTTTATTTCTACTATTATTAATATACGTTCATATGGTAT
AAGAATGGAAAGGGTTCCATTATTTGTCTGATCAGTATTTATTACAACAATCTTGTTATTATTATCTTTACCAGTTTTAG
CTGGAGCTATTACTATATTATTAACTGATCGCAATTTTAATACGTCTTTTTTTGATCCTGCTGGGGGGGGAGATCCTATT
TTATTTCAACATTTATTT
>ASAAR358-13|Araneae|COI-5P
GATTTTATACTTGATTTTTGGGGCATGAGCGGCTATAGTTGGAACAGCAATAAGAGTATTGATTCGAATTGAGTTAGGTC
AACCTGGAAGATTTATGGGAGATGACCAGCTTTATAATGTTATTGTAACTGCGCATGCTTTTGTAATAATTTTTTTTATA
GTAATACCTATTTTAATTGGGGGGTTTGGAAATTGATTAGTTCCTTTGATATTAGGGGCTCCTGATATGGCATTCCCTCG
AATAAATAATTTAAGTTTTTGATTACTTCCTCCTTCATTATTTCTTTTAATTGTATCATCTATAGTTGAAATAGGTGTTG
GTGCGGGATGAACTGTATATCCTCCTTTAGCTAGATTAGAGGGACATGCCGGGAGTTCTGTGGATTTTGCTATTTTTTCT
TTACATTTGGCTGGGGCTTCATCTATTATAGGAGCTATTAATTTTATTTCCACAATTATTAATATACGATTTTATGGAAT
AACTATAGAGAAAGTTCCTTTATTTGTATGATCTGTATTAATTACAGCTGTTTTATTATTACTTTCTTTACCTGTATTAG
CAGGTGCTATTACTATACTATTAACTGATCGAAATTTTAATACATCATTTTTTGATCCTTCCGGTGGTGGTGATCCTATT
TTATTTCAACACTTGTTT
>SPIEU899-10|Araneae|COI-5P|HQ975449
GACTTTATATTTAGTTTTTGGGGCTTGGTCAGCCATAGTGGGGACAGCTATAAGAGTGATGATTCGAATTGAATTGGGTC
AGTTGGGGAGATTTATTGGAGATGATCATTTATATAATGTAATTGTTACGGCTCACGCTTTTGTTATGATTTTTTTTATA
GTGATACCTATTTTAATTGGTGGGTTTGGAAATTGATTGGTTCCTTTAATATTAGGGGCTCCGGATATGGCTTTTCCTCG
AATGAATAATTTGAGATTTTGATTGTTGCCTCCTTCGTTATTTATGCTTTTTATTTCTTCTATGGTGGATATAGGGGTTG
GTGCTGGTTGAACAATTTATCCTCCTTTGGCTTCTTCTATGGGACATATAGGGAGAGCTATAGATTTTGCTATTTTTTCT
TTGCATTTAGCAGGGGCGTCTTCTATTATGGGAGCGGTGAATTTTATTACTACGATTTTAAATATACGTTCTGTAGGGAT
AAGAATAGATAGGGTTTCTTTGTTTGTTTGGTCGGTATTGGTTACCGCTATTTTATTGTTATTGTCTTTGCCTGTATTAG
CGGGTGCTATTACGATATTGTTGACGGATCGAAATTTTAATACATCATTTTTTGATCCTGCAGGTGGAGGGGATCCGATT
TTATTTCAACACTTGTTT
>BBUSE1129-11|Araneae|COI-5P
TACTTTGTATTTATTGTTTGGATCTTGGGCTGCTATGGTTGGGACAGCGATGAGTGTGTTGATTCGAATAGAATTAGGTC
AGGTAGGGAGATTATTAGGAGATGATCATCTTTATAATGTAATTGTTACTGCTCATGCATTTATTATAATTTTTTTTATG
GTAATACCTATTTTAATTGGTGGATTTGGAAATTGATTAGTTCCTTTGATATTGGGGGCTCCAGATATAGCATTTCCTCG
AATGAATAATTTAAGTTTTTGGTTATTACCTCCTTCTTTGATTTTATTATTTATTTCATCGATGGTAGAGATAGGTGTGG
GAGCAGGATGAACAATTTATCCTCCTTTGGGTTCAGGATTAGGTCATCCTGGTAGTGCTATAGATTTTGCTATTTTTTCT
TTACATTTAGCTGGAGCATCATCTATTATGGGAGCAGTAAATTTTATTACTACTATTATTAATATACGATCTTTTGGAAT
AAGAATGGAAAGGGTTTCGTTGTTTGTGTGATCAGTATTAATTACTGCTGTATTATTACTATTATCTTTACCAGTTTTAG
CTGGTGCAATTACTATATTATTGACAGATCGAAATTTTAATACCTCTTTTTTTGATCCTGCTGGTGGAGGTGATCCTGTA
TTATTTCAACATCTATTT
>CNGLF141-13|Mesostigmata|COI-5P
AACAATATACCTAGTTTTTAGCGCTTGAGCCGGAATAGTAGGCACAGCTCTTAGAATAATTATTCGAACTGAATTAGGTC
AACCAGGATCAACAATCGGTGACGACCAAATTTTTAATGTAATTGTTACTGCTCATGCATTTGTAATAATTTTCTTCATA
GTAATACCAGCAATAATTGGGGGGTTTGGAAATTGGCTTATTCCACTTATATTATCAGCTCCAGATATAGCCTTTCCCCG
AATAAATAACATAAGATTTTGACTTTTACCCCCTTCTTTACTTTTATTAATAACTTCTTCCTTAGTCGAATTTGGTGCAG
GGACTGGATGAACTGTGTATCCTCCTCTAGCAGCAAATATTTCACATAGAGGTGCCAGTGTAGATATAGCTATTTTTTCC
CTACACCTTGCTGGTATTTCTTCAATTTTAGGCTCCATTAATTTTATTACTACTATTCTAAACATACGTCCAATAGAAAT
AACATTAGAACGAGTCCCCTTATTTGTTTGATCTGTTTTTCTCACCACAATTCTTTTACTACTATCTCTCCCCGTTCTTG
CTGGAGCCATTACTATACTCCTTACTGACCGTAACTTTAATACTTCATTTTTTGACCC
>OWM294-13|Trombidiformes|COI-5P
CATAAAGATATTGGAACTCTATACTTTGCTTTCGGAGCCTGATCAGGGATGGTGGGGGCAAGCCTCAGAAGCTTAATTCG
ACTAGAACTAGGACAACCTGGAAGACTCATATTTAATGATCAAGTCTATAACACTATCGTAACGGCCCACGCTTTTGTCA
TAATCTTTTTTATAGTTATACCTATAATAATCGGAGGATTCGGAAACTGACTTCTTCCCTTAATGCTAAGAGCCCCAGAT
ATAGCATTCCCACGTATAAATAACATAAGTTTCTGATTACTCCCCCCTTCTCTGACCCTTCTTCTGTCAAGATCATTTAC
ATCCATAGGGGCTGGAACAGGCTGAACAGTATATCCCCCATTAGCTAGTAATATCGCCCACTCTGGACCATCAGTAGACT
TAGCAATCTTTTCACTTCATTTAGCTGGAGTATCGTCAATTCTAGGGGCCATTAACTTCATAGCAACAACTATCAATATA
AAACCTTCCTCAATAAAAACTGACAAAATCCCTTTATTTGTTTGATCTATTTTCATCACTACTATCCTCCTTCTTTTATC
TTTACCTGTTCTAGCAGGAGCTATTACCATATTACTAACAGATCGAAACTTTAACACTTCATTCTTTGACCCTGCTGGAG
GGGGAGATCCTATTCTGTACCAACATTTATTTTGATTTTTTGG
>NLARA045-12|Metellinamengei|COI-5P
TACATTATATTTTATTTTTGGGGCTTGAGCTGCTATAGTGGGTACTGCTATAAGAGTGTTAATTCGAATTGAATTAGGGC
AATCTGGAAGATTGTTAGGAGATGATCAGTTGTATAATGTTATTGTTACAGCTCATGCTTTTGTAATAATTTTTTTTATA
GTAATACCTATTTTGATTGGGGGTTTCGGAAATTGACTGGTTCCTTTAATGTTGGGGGCACCTGATATAGCTTTTCCTCG
AATAAATAATTTGAGATTTTGGTTATTACCTCCTTCATTTTTTTTATTGCTAGTTTCTTCTATGGTTGATATTGGAGTGG
GGGCAGGATGAACTGTTTATCCGCCTTTGGCGGCTTTGGATGGGCATGCTGGTAGCTCAATAGATTTTGCTATTTTTTCT
TTACATTTGGCTGGGGCTTCTTCAATTATGGGGGCTATTAATTTTATTTCTACTGTTTTGAATATACGTTCTTGGGGAAT
AAGAATAGATAGGGTTCCTTTGTTTGTGTGATCAGTATTGATTACCGCTGTTTTGTTACTTTTATCTTTACCGGTTTTAG
CTGGGGCTATTACTATGTTGTTAACTGATCGTAATTTTAATACTTCTTTTTTTGATCCTTCGGGTGGGGGTGATCCTATT
CTTTTTCAA
>SSPAB7995-13|Sarcoptiformes|COI-5P
AACTTTATATTTTATTTTTGGAGCTTGAGCTGGTTTGCTTGGTTCAGCCCTGAGAGGTTTAATTCGGCTAGAGCTAGGTC
AACCCGGATCTTTGTTAGAAAACGATCAAATTTACAACACTATTGTAACGGCTCATGCCTTTGTGATAATTTTCTTTATG
GTCATACCTATTATAATTGGTGGTTTTGGAAACTGGTTAGTCCCAATAATAATTGGAGCGCAAGATATGGCATTTCCACG
AATAAATAATATGAGATTTTGGCTTCTTCCTCCTTCTTTAGCCCTTTTATCATCTTCAGCCTTTGCTGGTATGGGGGCTG
GAACTGGTTGAACTGTTTATCCTCCTTTAGCAGGAAATCTTTTTCATTCTGGCTTTTCTGTGGATTTAGCAATTTTCAGT
CTTCATCTAGCTGGTGCTTCTTCAATCTTAGGAGCAATCAATTTTATTACAACAATTCTCAACATACGGTCTTCTTCTAT
AACTTTAGATTCAATTCCTTTATTTGTTTGATCTGTTTTAATTACAGCGGTTCTTTTACTTCTTTCTTTACCGGTTTTAG
CAGGTGCAATCACTATACTGCTGACAGATCGAAACTTTAATACTTCATTTT
>SPRMA1221-12|Araneae|COI-5P
GAGTTTGTATTTTATTTTTGGAGCTTGAGCGGCTATAGTAGGGATGGCAATAAGAGTGTTAATTCGAATTGAATTGGGAC
AAACCGGGAGATTATTAGGTGATGATCATTTGTATAATGTTATTGTAACTGCGCATGCTTTTGTAATAATTTTTTTTATA
GTAATGCCAATTTTAATTGGAGGCTTTGGTAATTGGTTAGTTCCTTTAATATTAGGAGCTCCTGATATAGCATTCCCTCG
AATGAATAATTTAAGATTTTGGTTGTTGCCTCCTTCTCTATTTTTACTTTTTATTTCTAGTATAGATGAAATAGGGGTGG
GGGCAGGATGAACTGTTTATCCCCCTCTTTCTTCTTTAGAAGGGCATGCTGGGAATTCTGTTGATTTCGCCATTTTTTCT
TTACACTTAGCTGGGGCTTCTTCAATTATGGGGGCTATTAATTTTATTTCGACTATTTTAAATATACGTAGTCATGGTAT
AACTATAGAAAAAGTGCCTCTGTTTGTTTGGTCTGTTCTTATTACAGCTGTTTTGCTTTTATTATCTTTACCTGTTTTGG
CGGGGGCTATTACTATATTATTGACTGATCGAAATTTTAATACCTCATTTTTTGACCCTTCTGGAGGGGGGGATCCTGTT
TTATTCCAACACTTATTT
>SPICA1382-10|Araneae|COI-5P|JF884954
GACTTTATATTTTATTTTTGGTGCTTGAGCTGCGATAGTTGGGACGGCAATAAGAGTTTTGATTCGAATTGAATTAGGAC
AGTCGGGGAGATTATTGGGGGATGACCAATTGTATAATGTTATTGTTACAGCGCATGCTTTTGTGATAATTTTTTTTATG
GTGATGCCTATTTTAATTGGAGGGTTTGGTAACTGGTTAGTCCCTTTAATGTTGGGGGCTCCGGATATAGCTTTTCCTCG
GATGAATAATTTGAGATTTTGATTATTACCTCCTTCATTTTTTTTACTTTTAGTTTCTTCTATAGTTGATATGGGAGTAG
GGGCGGGGTGGACTATTTATCCTCCTTTAGCCTCTTTAGATGGGCATGCTGGAAGATCTATAGATTTTGCTATTTTTTCT
TTACATTTGGCTGGGGCGTCTTCTATTATAGGGGCTATTAATTTTATTTCTACTATTTTGAATATACGATCGTGGGGTAT
GAGAATGGAAAAGGTTCCTTTATTTGTCTGATCCGTTTTAATTACGGCTGTTTTACTTTTACTTTCTTTACCGGTGTTAG
CTGGAGCTATTACTATATTGTTAACTGATCGTAATTTTAATACTTCTTTTTTTGATCCTTCTGGAGGGGGGGATCCTATT
CTTTTTCAACACTTATTT
>SGABR3514-12|Trombidiformes|COI-5P
AACTCTTTACTTTGCCTTCGGAGTATGATCTGGAATAGTAGGAGCAAGACTCAGAACACTAATCCGTCTAGAATTAGGAC
AACCAGGTAGACTTATTGGAAGAGACCAAATCTATAACACAATTGTAACAGCACACGCTTTTGTAATAATCTTCTTTATA
GTTATACCAATAATAATCGGTGGTTTCGGAAATTGATTAGTACCTTTAATAATCAGAGCTCCAGATATAGCTTTCCCACG
AATAAATAATATAAGATTTTGATTACTACCGCCAGCCTTAATTTTACTATTAACCAGATCTTTCACTTCAATAGGAGCTG
GAACAGGGTGAACAGTATACCCACCCTTATCAAGAAATTTAGCTCATGCAGGCCCATCTGTAGATTTAACTATTTTTTCT
CTTCATTTAGCAGGTATCTCATCTATCTTAGGGGCAATTAACTTTATAGCAACTATTATAAATATAAAACCATCTTCTAT
AAAAATAGAACAAATTCCTCTATTTGTTTGATCAATTTTTATCACAACTGTACTTCTTTTATTATCTTTACCAGTTTTAG
CTGGAGCTATTACTATATTATTAACAGACCGAAACTTTAATACATCATTCTTTGATCCTGCAGGGGGAGGAG
>BBUSA1091-10|Araneae|COI-5P|HQ930781
AAGATTATATTTTTTATTTGGTGTGTGGTCTGCTATAGTCGGAACGGCTATAAGAGTTTTAATTCGGATTGAGTTAGGAC
AGTCTGGGAGATTTTTAGGAGATGACCAGTTATATAATGTGATTGTAACTGCTCATGCCTTTGTTATAATTTTTTTTATA
GTTATACCTATTTTAATTGGGGGTTTTGGAAATTGATTAGTTCCATTAATATTAGGAGCACCAGATATGGCGTTTCCTCG
AATAAATAATTTAAGTTTTTGGCTTTTACCTCCTTCTCTTTTTATATTATTTATTTCGTCTATAGTAGATGTTGGTGTGG
GGGCGGGTTGAACTATTTATCCGCCTTTAGCCTCTTTAGAGGGGCATTCAGGCAGATCAGTAGATTTTGCTATTTTTTCT
TTACATTTGGCAGGGGCTTCTTCGATTATAGGAGCTATTAATTTTATTTCTACAATTATTAATATGCGCATAAGTGGAAT
TACCATAGAGAAAGTGCCACTTTTTGTGTGGTCTGTATTAATTACTGCCGTGTTATTATTATTGTCTCTCCCTGTTTTAG
CAGGGGCTATTACTATATTGTTAACTGATCGAAATTTTAATACATCGTTTTTTGACCCGTCTGGGGGAGGAGACCCTATT
TTGTTCCAACATTTATTT
>ARONT211-09|Nerienemontana|COI-5P|GU682679
TACTTTATATTTTATTTTTGGGGCTTGAGCTGCTATAGTAGGAACAGCTATAAGAGTTTTGATTCGTGTTGAATTAGGTC
AAGTTGGAAGAATATTAGGAGATGATCAATTGTATAACGTGATTGTTACAGCTCATGCTTTTGTAATAATTTTTTTTATA
GTTATACCTATTTTAATTGGTGGGTTTGGTAATTGATTAGTTCCTTTAATGTTAGGAGCTCCTGATATGGCTTTCCCTCG
AATAAACAATTTAAGATTTTGGCTTTTACCCCCTTCTTTATTTTTATTATTTATTTCTTCTATAGTAGAAATGGGAGTTG
GATCAGGTTGGACAGTATATCCCCCTCTTTCTTCATTAGAGGGACATTCTGGAAGTTCTGTAGATTTCGCAATTTTTTCT
CTTCATTTGGCTGGAGCCTCTTCTATTATAGGGGCTATTAATTTTATTTCTACTATTTTGAATATACGGGCTTATGGAAT
ATCTATAGAGAAGGTTTCTTTATTTGTTTGGTCGGTATTAATTACTGCTGTTTTATTATTATTATCTCTTCCAGTTTTAG
CGGGGGCAATTACTATATTATTAACTGATCGAAATTTTAATACTTCTTTTTTTGACCCTGCTGGGGGGGGAGATCCTATT
TTATTTCAACATTTATTT
>MYMCB615-11|Eupodidae|COI-5P|JX837108
AACTTTATATTTTATTTTTGGATTTTGAGCTGCTCTATTAGGAGCTTCTATGAGAATGTTTATTCGTATAAAATTAGGAA
GCCCAAATTTAATAGACCAAAATGACCAAATCTATAATGTTATAGTAACAGCACATGCTTTTGTAATAATTTTTTTTATA
GTTATACCAATTATAATTGGAGGTTTTGGAAATTGATTAGTGCCTATTATAATCGGAGCCCCTGATATAGCCTTTCCACG
AATAAATAATATAAGCTTTTGACTTTTACCACCTTCTTTAATACTATTAATTATATCATCTATTATTAATAGAGGAGCAG
GAACAGGATGAACTGTTTATCCTCCTTTATCTAGACAAATATTTCATAGAGGTTCTTCAGTAGATTTAACAATTTTTTCT
CTACATATAGCAGGAATTTCTTCTATTTTAGGAGCTATTAATTTCATCACAACTATTATAAATATACGATCAAAAATAAT
AAACTTTGAACGTATACCTTTATTTGTATGATCAGTAATAATTACAGCTGTTTTACTACTATTATCTTTACCTGTATTAG
CAGGAGCTATTACAATACTTTTAACAGACCGAAACTTTAATACTTCTTTCTTTGATCCAGCTGGAGGTGGAGACCCAATT
TTATATCAACATTTATTT
>MYMCA1507-11|Camisialapponica|COI-5P|JX837575
CACTCTTTACTTCATTTTTGGGACTTGAGCAGGTTTGGTTGGCTCAGCCTTAAGGGCATTAATTCGCCTTGAGTTAGGAC
AGCCTGGATCTCTTTTAGATAATGACCAAATCTATAATACTATCGTAACTGCTCATGCTTTTGTTATAATTTTTTTTATA
GTAATGCCTGTTATAATCGGAGGGTTTGGAAACTGATTGGTTCCCATGATAATTGGGGCCCAAGACATAGCCTTCCCGCG
CATAAACAATATAAGGTTCTGGCTACTCCCCCCATCTTTAACTTTACTTTCAGCTTCGGCTTTTGCAGGGATAGGGGCAG
GAACCGGATGAACAGTCTACCCACCCCTAGCGGGAAACATGTTCCATTCTGGAATTTCAGTGGATTTAGCTATTTTCAGT
TTGCATTTAGCCGGTGCTTCTTCCATTCTAGGAGCCATTAACTTTATTACTACTATTATAAACATACGATCCTCTGCCAT
AAGGATAGACGCTATCCCCCTATTCGTATGGTCTGTTCTAATCACAGCTGTTCTTCTCTTACTCTCATTACCTGTGTTGG
CAGGTGCAATTACAATGCTATTAACAGACCGTAATTTTAACACGTCGTTTTTTGACCCAACTGGTGGAGGAGATCCTATT
CTCTACCAACATTTATTC
>BBUSE1542-12|Araneae|COI-5P
GACTTTGTATTTAATTTTTGGGGCGTGAGCGGCCATAGTAGGGACTGCTATAAGAGTTTTAATTCGAGTTGAATTGGGTC
AGCCCGGGAGATTTATTGGGGATGACCAGTTGTATAATGTAATTGTAACGGCGCATGCGTTTGTGATGATTTTTTTTATA
GTAATACCTATTTTAATTGGCGGGTTTGGAAATTGGTTAGTGCCTTTAATGTTGGGGGCTCCTGATATAGCTTTTCCACG
AATGAATAATTTAAGATTTTGATTATTACCCCCGTCTTTATTTTTATTAATTGTATCTTCTATAGTAGAAATGGGTGTAG
GAGCTGGGTGAACAGTTTATCCCCCATTAGCGAGATTGGAGGGGCATGCTGGGAGATCTGTTGATTTTGCTATTTTTTCT
TTACATTTAGCTGGGGCGTCTTCTATTATGGGCGCTATTAATTTTATTTCTACCATTATTAATATGCGGTTTTATGGGAT
AACTATAGAAAAGGTGCCCCTATTTGTGTGATCCGTCTTAATTACTGCGGTTTTATTACTTCTTTCCTTACCAGTACTAG
CGGGGGCTATTACTATATTATTAACTGATCGAAATTTTAATACTTCTTTCTTTGATCCTTCTGGGGGGGGTGATCCGATT
TTATTTCAGCATTTATTT
>PSSAF126-10|Pseudoscorpiones|COI-5P|HQ970014
AACTCTCTACCTAATTTTTGGAATTCTTGCAGGTTTCGTAGGACTTTGTTTTAGTATATTAATTCGTCTCCAACTTTTCT
TCCCTAGAGGTGTAATAAATGAGCACTCTTATAATATTATTATTACTGTTCATGCTTTGGTTATAATTTTCTTTATAGTT
ATACCCATTATAATTGGAGGTTTTGGGAATTGGCTAGTTCCATTAATAATTGGAGCTCCTGATATAGCCTTCCCTCGTAT
AAATAATTTAAGATTTTGACTTTTACCCCCTTCCTTTACTCTTTTAACCCTTTCTTCATTAATTGAAATAGGATGTGGAG
CTGGGTGAACTATCTACCCCCCTCTAACTAACATCTATGCTCACCCAGGGAGATCTGTAGATTATGTTATTTTTTCTCTA
CATCTTGCAGGGATTTCCTCCATTTTAGGAGGGGTTAATTTTATTTCTACTATTATTAATATACGGGACCCATCCCTTTC
TTTTAAAATAATACCTCTCTTTGTCTGATCTGTTCTAGTTACAGTTGTTTTAATTCTCCTGGCAATACCTGTTTTAGCTG
GGGCAATTACTATACTTCTTACTGATCGAAATTTTAGTACTTCTTTTTTCGACCCAGCAGGGGGAGGAGACCCAATCTTA
TTTCAACATTTATTT
>SPIRU1290-11|Satilatlasmonticola|COI-5P|KF368760
GAGTTTATATTTTATTTTTGGGGCTTGAGCTGCTATAGTAGGAACGGCAATAAGAGTTTTGATCCGGATTGAGTTAGGGC
AAACAGGGAGATTATTAGGTGATGATCAGTTATATAATGTAATTGTAACTGCTCATGCTTTTGTGATGATTTTTTTTATA
GTTATACCTATTTTAATTGGGGGGTTTGGTAATTGATTGGTTCCTTTAATGTTGGGGGCACCTGATATGGCTTTTCCACG
AATGAATAATTTAAGTTTTTGGCTATTGCCTCCTTCTTTATTTTTGCTTTTTATCTCTAGAATAGATGAGATAGGAGTAG
GAGCGGGTTGAACAGTGTATCCTCCTCTTGCTTCTTTAGAGGGGCATTCTGGGAGTTCTGTTGATTTTGCTATCTTCTCT
CTTCATTTGGCGGGGGCATCTTCTATTATGGGTGCGATTAATTTCATCTCTACTATTCTCAACATACGAGGGTATGGAAT
AAGAATAGAGAAAGTTCCTTTATTTGTGTGATCTGTTTTAATTACAGCTGTTTTGCTCTTATTATCGCTACCTGTTTTAG
CTGGTGCTATTACTATACTTCTAACAGATCGTAATTTTAATACTTCTTTTTTTGACCCTTCTGGGGGAGGGGATCCAGTT
TTGTTTCAACATTTATTT
>SPICH735-09|Estrandiagrandaeva|COI-5P|GU684387
AACATTATATTTTATTTTTGGGGCTTGAGCTGCTATAGTGGGAACTGCTATAAGAGTTTTAATTCGAATTGAGTTAGGAC
AGACTGGAAGAATATTAGGGGATGATCAGTTATACAATGTAATTGTAACTGCACATGCTTTTGTAATAATTTTTTTTATA
GTTATACCAATTTTAATTGGAGGGTTTGGAAATTGATTAGTCCCTCTTATATTAGGGGCTCCTGATATGGCTTTCCCTCG
AATAAATAATTTAAGTTTTTGGTTACTTCCTCCTTCTTTATTATTATTATTTATCTCTTCTTTAGTTGAGATAGGTGTTG
GGACAGGATGAACTGTTTATCCCCCTTTATCGTCTTTGGAAGGTCATTCTGGAAGTTCTGTAGATTTTGCTATTTTTTCT
TTACATTTAGCCGGGGCTTCTTCAATTATAGGAGCTATTAATTTTATTTCTACTATTTTAAATATGCGATCATATGGGGT
TACAATAGAAAAAGTTTCTTTATTTGTGTGATCCGTTTTAATTACTGCTGTTCTTTTATTATTATCGTTACCTGTGTTAG
CAGGTGCTATTACTATACTTTTAACTGATCGAAATTTTAATACATCTTTTTTTGATCCTGCTGGAGGTGGGGATCCTATT
TTATTCCAACATTTATTT
>SPICA724-10|Araneae|COI-5P|JF885903
TACTTTATATTTTATTTTTGGAGCATGGTCAGCTATAGTAGGAACGGCCATAAGAGTGTTAATTCGAATTGAGTTAGGGC
AAATTAGAAGAGTGTTAGGAAATGATCAACTTTATAATGTAATTGTTACTTCTCATGCTTTTGTAATAATTTTTTTTATA
GTAATACCTATTTTAATTGGTGGGTTTGGGAATTGGTTAGTTCCTCTAATATTAGGTGCTCCTGATATGGCATTTCCTCG
AATAAATAATTTAAGTTTTTGGCTACTTCCTCCTTCATTACTATTATTATTTATTTCTTCTATGGTAGAAATAGGAGTTG
GGGCAGGTTGAACTGTTTATCCTCCTTTATCTTCATTAGAAGGACATTCTGGGGGATCCGTTGATTTTGCTATTTTTTCT
TTACATTTAGCAGGGGCTTCCTCTATTATAGGGGCTATTAATTTTATTTCCACAATTTTAAATATACGAGCATATATAAT
TAGTATAGAAAAGGTGTCTTTATTTGTTTGATCCATTTTAATTACTGCTGTTCTTTTATTATTATCTTTACCTGTTTTAG
CTGGGGCTATTACAATACTATTGACTGATCGAAATTTTAATACATCATTTTTTGATCCTGCTGGAGGAGGAGATCCTATT
TTATTTCAACATTTATTT
>CNPAK132-13|Arachnida|COI-5P
TTTAGGATTAAGAGCTTGATCTGGTATACTAGGAACTGCTCTTTTAATTCGAACTGAATTAGGTCAACCAGGATCTACTA
TTAGAGATGACCAAATTTTTAATGTTATTGTTACTGCACATGCCTTTATTATAATTTTCTTTATAGTTATACCTGCAATA
GTAGGAGGATTTGGCAATTGATTAGTACCTTTAATAATTGGAGCCCCAGATATAGCTTTTCCACGAATAAATAATATAAG
ATTTTGATTACTTCCCCCTTCTTTACTACTTTTAATCTCCTCTTCATTAGTAGAAAGAGGAGCTGGAACTGGATGAACAG
TATATCCTCCTTTAGCAGCAAATATTTCACATAGAGGGAGAAGTGTTGATTTAGCAATTTTTTCTCTTCACCTTGCAGGT
TTATCTTCAATTCTAGGTTCAATTAACTTTATTACTACTATTATAAATATACGATCTTCAAGAATAACTTTAGATCAAAT
ACCTTTATTTGTTTGATCAATTTTA
>SAMIT863-10|Trombidiformes|COI-5P|HQ973174
AACACTATACTTCGCTTTCGGTGCATGATCAGGAATAGTAGGGGCTAGACTAAGAAGTTTAATCCGCCTTGAATTAGGAC
AACCTGGAAGACTAATTTTCAATGATCAAGTGTATAATACTATCGTAACAGCTCACGCTTTTATCATAATCTTCTTTATA
GTTATACCTATAATAATCGGTGGATTCGGAAACTGGCTTGTCCCTTTAATACTATCAGCCCCTGATATAGCTTTTCCACG
AATAAACAATATAAGCTTTTGATTACTTCCACCCTCTCTAACTCTTCTTCTTTCTAGTTCTTTTACATCTATAGGAGCTG
GAACAGGCTGAACAGTATATCCACCATTGTCAAGTAATATTGCTCATTCAGGTCCTTCTGTAGACTTAACCATCTTTTCT
CTTCATTTAGCAGGAGTTTCTTCCATTCTTGGAGCTATCAATTTCATAGCTACAACTATAAACATAAAACCTTCATCGAT
AAAAATTGATAAAATACCCTTATTTGTCTTATCAATCTTTATCACCACAATCCTCCTTCTCTTATCACTACCAGTGTTAG
CAGGAGCTATTACTATACTTTTGACCGACCGAAACTTTAACACATCATTCTTTGATCCAGCTGGGGGAGGAGACCCAATT
CTTTACCAACACTTATTC
>SSPAA7773-13|Trombidiformes|COI-5P
CACTATATACTTTATTTTGGGGGCATGGTCAGGTCTAATAGGATTAAGATTAAGATCTATCATTCGACTTGAATTAGGCC
AACCAGGACAGGTTATTGGTAACGACCAATTGTACAATTCAATTGTTACAGCTCACGCATTTATCATAATCTTCTTTATA
GTCATACCAATCATAATTGGAGGCTTTGGAAACTGATTAATCCCAATTATGTTGGGGGCTCCAGATATGGCATTCCCCCG
TCTTAATAACATAAGATTTTGATTACTTCCTCTTTCTCTAACTCTTTTAATTATAGCATCTCTATCCCCTATAGGAGTAG
GAACGGGTTGAACAATATATCCCCCTTTATCAGGATACATATCACACAGAAGGATTTCTGTTGATCTATCGATTTTCTCG
CTTCACCTTGCAGGAGTAGCGTCTATTCTAGGAGCAATCAACTTTTTAACAACGTTTGTTAATATATATAACAAAAATCT
ATGATGAGATACTGTTCCCCTATTCGTATGAGCAACTATAGTTACCGCAGGATTATTACTAATCTCCCTTCCCGTACTTG
CTGGTGCTATTACCATACTACTTTTCGATCGCAATTTTAATACAACATTCTTCGATCCGAGAGGAGGGG
>SSWLC1162-13|Sarcoptiformes|COI-5P
AACTTTATATTTTATCTTTGGGGCTTGGGCTGGACTACTAGGTTCTGCATTAAGAGCACTAATCCGATTGGAGTTAGGAC
AGCCAAGTTCTCTACTTGAAAACGACCAAATTTATAACACCATTGTTACAGCTCACGCCTTTGTAATAATTTTTTTTATA
GTGATGCCGGTAATAATCGGGGGGTTTGGTAATTGACTGGTGCCAATGATAATTGGAGCTCAAGACATGGCTTTCCCTCG
AATAAACAATATAAGATTCTGACTTTTACCCCCGTCCTTAAGTTTACTGTCTTCATCAGCTTTTGCTGGAATAGGGGCAG
GGACTGGTTGAACGGTTTACCCTCCTCTGTCTAGTAATTTGTTTCACTCAGGTATCTCCGTAGACTTGGCCATTTTTAGA
CTTCACTTGGCAGGTGCCTCTTCCATTTTGGGTGCCATTAATTTCATTACCACAATTATAAACATACGATCCGCATCAAT
ATCCTTAGATTCTATTCCTCTTTTTGTCTGATCAGTTCTAATCACAGCGGTACTCTTATTGCTTTCTTTACCGGTTTTAG
CGGGAGCTATCACCATATTACTAACAGACCGAAACTTTAACACTTCTTTTTTTG
>MYMCE919-12|Tectocepheus|COI-5P|JX836604
AACACTATACTTTTTGTTGGGGGCCTGAGCAGGGGTGTTAGGTTCTGCTTTAAGAGGTTTAATTCGTCTGGAGTTGGGCC
AGCCCGGGTCATTGTTTGAGAATGACCAAATCTATAACACTGTTGTTACATCTCATGCTTTTGTAATAATCTTTTTCATG
GTTATACCTGTGATAATTGGAGGCTTTGGAAATTGGCTGGTTCCTATAATAATTGGAGCTCAAGATATGGCATTCCCTCG
AATAAACAATATGAGTTTTTGGCTCCTCCCTCCTTCTTTAATTCTTTTGTTGAGTTCTTCTTTTGGGGGAATAGGTGTTG
GAACTGGTTGAACAGTTTACCCTCCTTTAGCAGGGAATTTATTCCATTCTGGTGTTTCTGTTGATTTGGCTATTTTTAGC
TTGCATCTTGCTGGAGCATCCTCTATTCTTGGTGCTATCAATTTTATTACCACTGTTATCAACATGCGTTCTTCTTGTGT
AAGATTGGATAGAATCCCTCTTTTTGTTTGATCCGTTTTAATTACGGCTGTTCTTTTACTTTTATCCTTACCTGTTCTGG
CAGGTGCAATCACTATGTTGTTAACCGATCGTAATTTCAATACATCTTTTTTTGACCCTTCTGGGGGAGGGGATCCCATT
TTATACCAACACCTTTTT
>MYMCE696-12|Ologamasidae|COI-5P|JX837697
CACTATGTATTTAATTTTTGCTGGGTGAGCTGGAATAGCAGGTATAGCTCTAAGAATAATTATCCGAGCAGAATTAGGTC
AACCTGGACCTTTAATTGGGGATGATCAAATTTATAACACTATTGTTACAGCTCATGCTTTTGTTATAATTTTTTTTATA
GTTATACCTGCCTTAATTGGGGGTTTCGGTAACTGGTTAACCCCTATTATAATTATAGCCCCCGATATAGCTTTTCCACG
AATAAACAATATAAGATTTTGATTATTACCCCCGTCTTTAACATTACTCTTATTTTCTTCTTTAGTAGAATCTGGAGCAG
GGACAGGGTGAACAGTATACCCCCCTTTAGCTTCAAATATCTCTCATAGAGGTGGAGCTGTAGATTTAGCAATTTTCAGT
CTTCATTTGGCAGGAATTTCATCTATTTTAGGCTCTATTAATTTTATTACAACTATTATAAATATACGACCTAAAAATAT
ATCTATAGAGCAATTACCTCTATTTGTTTGATCAGTATTAATTACAACTATTCTTCTTTTATTATCTCTACCTGTTTTAG
CTGGAGCTATTACTATACTTTTAACAGATCGAAATTTTAATACCTCTTTTTTTGATCCAAGAGGAGGAGGAGATCCTATT
TTATACCAACATTTATTT
>MYMCF423-12|Ghilarovizeteslongisetosus|COI-5P|JX836486
AACTTTGTACTTCATTTTCGGTGCTTGAGCTGGGCTAATAGGATCTGCATTAAGAGGTCTAATTCGTTTAGAATTAGGTC
AGCCAGGTTCTTTAATGGGCAACGACCAGGTCTATAACACTATTGTGACAGCTCACGCCTTTGTTATAATTTTTTTTATA
GTAATACCCATTATAATTGGAGGTTTCGGTAACTGGCTAGTACCGATAATAATTGGAGCTCAAGATATAGCCTTCCCTCG
AATAAATAATATAAGATTTTGGCTTCTGCCCCCTTCTTTGACATTACTTTCTGCGTCAGCCTTTGCTGGGATAGGCGCTG
GGACAGGCTGAACTGTGTACCCCCCCCTGTCGAGAAGAATGTTCCATTCTGGATTCTCAGTGGACCTCGCTATTTTTAGA
CTTCACTTAGCAGGCGCCTCCTCTATTTTGGGGGCTATCAACTTTATCACAACAATTATAAATATACGATCTTCTTCTGT
AACCCTTGACTCAATTCCTTTATTTGTATGGTCTGTCTTAATTACTGCGGTTTTGTTACTGCTATCTCTTCCAGTACTGG
CGGGGGCCATCACAATACTTTTAACAGACCGAAATTTTAACACAACATTTTTTGACCCATCTGGTGGGGGGGACCCAATC
CTATACCAACACCTATTC
>HVDBS353-11|Araneae|COI-5P
AACATTATATTTAATTTTTGGAGCTTGAGCAGCTATAGTAGGAACAGCAATAAGAGTATTAATTCGAATTGAGTTAGGAC
AGCCAGGAAGATTTATAGGGGACGACCAATTATATAATGTAATTGTTACTGCCCATGCTTTTGTAATAATTTTTTTTATA
GTTATACCGATTTTAATTGGGGGTTTTGGAAATTGACTAGTTCCTTTAATATTAGGAGCTCCTGATATGGCTTTTCCTCG
AATAAATAATTTAAGATTTTGATTATTACCACCATCTTTATTTCTTCTAATTATTTCATCTATAGTAGAAATAGGAGTAG
GAGCCGGATGAACTGTATATCCTCCTTTAGCAAGATTAGAAGGTCATGCTGGGAGTTCAGTAGATTTTGCAATTTTTTCA
TTACATTTGGCAGGAGCTTCTTCAATTATAGGGGCTATTAATTTTATTTCTACTATTCTTAATATACGATTTTATGGAAT
AACAATAGAAAAAGTTCCTTTATTTGTTTGATCAGTGTTAATTACAGCTGTTCTTCTTTTATTATCTTTACCGGTTTTAG
CAGGAGCTATTACAATATTACTTACTGATCGAAATTTTAATACTTCTTTTTTCGATCCTTCAGGAGGGGGTGATCCTATT
TTATTTCAGCATTTGTTT
>PPELE605-11|Araneae|COI-5P|JN308752
TTCATTATATTTAATTTTTGGAGCCTGGGCCGCTATGGTAGGGACAGCAATAAGAGTTTTGATTCGAATTGAATTAGGTC
AATCTGGTAGATTTATTGGAGATGACCAATTATATAATGTAATTGTTACTGCTCATGCTTTTGTTATAATTTTTTTTATA
GTTATACCTATTTTGATTGGGGGATTTGGGAATTGATTGGTGCCTTTAATATTGGGTGCACCTGATATAGCTTTCCCTCG
AATAAATAATTTAAGATTTTGGTTATTGCCCCCTTCTTTATTTTTATTAATTGTTTCATCTATAGTCGAAATAGGAGTAG
GGGCAGGTTGGACTGTTTACCCCCCTTTAGCTGGTTTAGAAGGTCATGCTGGTAGATCAGTAGATTTTGCTATTTTTTCT
TTACATTTAGCAGGGGCTTCTTCAATTATAGGGGCTATTAATTTTATTTCTACTATTATTAATATACGGTTTTATGGAAT
AACTATAGAAAAGGTGCCTTTATTTGTTTGGTCTGTATTGATTACTGCAGTACTTTTATTATTATCTTTACCAGTGTTAG
CAGGAGCTATCACAATATTATTAACTGATCGAAATTTTAATACATCCTTTTTTGATCCTTCTGGTGGAGGGGACCCTATT
TTGTTTCAACATTTATTT
>BBUSA472-10|Araneae|COI-5P|HQ931540
AAGTTTATATTTTTTGTTTGGTGTTTGGTCAGCTATAGTGGGGACTGCTATAAGAGTTTTAATTCGGATTGAGTTAGGGC
AATCTGGAAGTTTTTTAGGAGATGATCAATTATATAATGTTATTGTTACTGCACATGCTTTTGTTATAATTTTTTTTATA
GTGATACCTATTTTAATTGGAGGTTTTGGAAATTGATTAGTTCCTTTGATATTAGGTGCACCAGATATAGCGTTTCCTCG
GATAAATAATTTAAGATTTTGACTTTTACCTCCGTCTCTTTTTATATTATTTATTTCATCAATGGTTGATGTGGGTGTTG
GGGCAGGTTGGACTATCTACCCCCCTTTAGCTTCATTAGAAGGTCATTCGGGAAGATCTGTAGATTTTGCTATTTTTTCT
TTACATTTAGCAGGGGCTTCTTCAATTATAGGGGCTATTAATTTTATTTCAACAATTATTAATATACGAATGAGAGGAAT
TTTTATAGAAAAAGTTCCACTTTTTGTGTGATCTGTATTAATTACTGCGGTGTTATTATTATTATCCTTACCTGTTTTGG
CTGGGGCTATTACCATATTATTAACAGATCGAAATTTTAATACGTCTTTTTTTGATCCTTCAGGAGGAGGGGATCCTATT
TTATTTCAACATTTATTT
>MYMCG654-12|Hypoaspis|COI-5P|JX835124
TTCTTTATATTTTTTATTTGCAATTTGGGCAGGATTTTTAGGATTATCCTTAAGGATAATTATTCGTTTAGAACTTAATC
AACCAGGCTCGTTAATCGGAGATGACCAAATCTATAATGTCCTAGTTACTTCTCATGCTTTTATTATGATTTTTTTTATA
GTCATACCTGCAATAATCGGAGGATTTGGCAATTGATTAATCCCACTTTATCTTTCTGCCCCTGATATATCCTTCCCTCG
ATTAAATAATCTAAGATTTTGACTAATTATTCCCTCTATTATCTTATTAATTTTTTCAAGCTTTATTGAAAATGGAGTAG
GAACCGGATGAACTGTCTATCCCCCTTTATCCAACAATATTAGTCACAGAGGAGCCGCGGTTGACTTAGCCATTTTTAGG
CTTCATATCGCAGGAATTTCTTCTATCTTAAGTTCAATTAATTTTATTTCTACAATTTTAAATATACGTCCAAATTCTTT
TCTACCAGAACAAAACCCTTTGTTTGTTTGAGCTATCCTAATTACAACTATTTTATTACTTCTTTCCCTACCTGTTTTAG
CGGGGGCTATTACTATATTACTAAGAGACCGGAATTTTAACACTTCTTTTTTTGACCCAAGAGGTGGGGGAGACCCAGTT
CTATACCAACATCTTTTT
>BBUSE1595-12|Araneae|COI-5P
TACTTTATATTTATTATTTGGGGCTTGATCTGCTATGGTTGGAACAGCAATAAGAGTATTAATTCGTGTGGAGTTAGGTC
AGGTTGGGAGATTTATAGGAGATGATCATCTTTATAATGTTATTGTAACTGCACATGCTTTTGTTATGATTTTTTTTATA
GTTATACCAATTATGATTGGTGGTTTTGGCAATTGATTAGTTCCTTTGATGTTAGGGGCCCCAGATATAGCTTTTCCTCG
TATAAATAATTTAAGATTTTGGTTATTACCTCCTTCATTAATAATATTGTTTGTATCTTCGATAGTAGAGATAGGAGTGG
GAGCGGGATGAACTATTTATCCTCCTTTAGCATCTAGAATTGGGCATTCCGGGAGATCAGTTGATTTTGCGATTTTTTCT
TTACATTTGGCTGGAGCTTCTTCAATTATAGGTGCTATTAATTTTATTACTACTATTATTAATATGCGTTTAGTAGGGAT
GAGAATGGAAAAAGTCCCTTTATTTGTGTGATCTGTATTTATTACTGCTATTTTATTGTTGCTTTCTTTACCGGTGTTAG
CTGGGGCTATTACTATGTTGTTGACAGATCGAAATTTTAATACTTCTTTTTTTGACCCTGCTGGTGGAGGGGATCCAATT
TTATTTCAACATTTATTT
>ETKS466-13|Araneae|COI-5P
AACGTTATATTTAATATTTGGTGTTTGAGCAGCTATGGTTGGGACTGCTATAAGAGTTTTGATTCGAATAGAGCTTGGTC
ATTCTGGAAGAATATTAGGTGATGATCATTTATATAATGTAATTGTAACAGCTCATGCTTTTGTAATAATTTTTTTTATA
GTAATACCTATTTTAATTGGAGGTTTTGGAAATTGATTGGTTCCTTTAATATTAGGGGCTCCGGATATATCATTTCCTCG
AATGAATAATTTATCATTTTGATTACTTCCTCCTTCTTTGTTTTTATTGTTTATATCTTCTATAGTTGAAACAGGAGTAG
GTGCTGGGTGGACTGTTTATCCTCCTTTAGCTTCTTCTACAGGACATATAGGGAGCTCTATGGATTTTGCTATTTTTTCT
TTACATTTAGCTGGTGCTTCCTCTATTATAGGGGCTGTAAATTTTATTTCCACTATTATTAATATACGATTGGCTAGAAT
AAGAATGGAAAAAGTTCCTTTATTTGTGTGATCTGTTTTTATTACTGCTATTTTATTATTATTATCTTTACCAGTATTAG
CTGGAGCTATTACTATATTGTTAACGGATCGAAATTTTAATACTTCGTTTTTTGATCCGGCGGGAGGAGGAGATCCTATT
TTATTTCAACATTTGTTT
>CNGBI1626-14|Arachnida|COI-5P
GTACTTTATATTTTTTATTTGCAATTTGATCTGGTATCTTGGGAAGATCAATAAGTATGTTTATTCGAATTGAACTAAGA
CAACCAGGTATTTTAATTGGTGATGATAATATTTATAATACTTTGGTTACAGCACATGCATTTGTAATAATTTTTTTTAT
AGTTATACCTGCCATAATTGGAGGTTTTGGTAATTGATTGATCCCTTTAATAATTTCTGCTCCTGATATAGCTTTTCCTC
GAATAAATAATATGAGATTTTGACTACTTCCCCCCTCGTTAACTTTTTTAATTCTATCTTCTATAATTGATAGAGGTGTG
GGAACTGGTTGAACTGTATACCCTCCTTTAGCAAATAATTTATTTCATAGAGGGATTTCAGTTGATTTAGCTATTTTTAG
GTTACATTTAGCAGGAATTAGATCTATCTTAGGTTCAATTAATTTTATTACTACAATTTTAAACATACGAAAAAATATAA
TTTTTATAGAACGTCTACCCTTATTTGTTTGATCTGTGTTTATTACAACAATTTTATTATTATTAAGACTGCCTGTTTTA
GCAGGTGCAATTACTATACTTTTAACAGATCGTA
>MYMCE343-12|Cyta|COI-5P|JX838418
AACTATGTACTTTCTGTTTGGGGCCTGAGCATCCTTACTGGGGGCATCTATAAGAGTTCTAATTCGATTAGAACTATCTC
AACCAGGAGCAATAATGGGAAATGATCAAATCTACAACACAATTGTAACAGCTCACGCTTTTGTAATAATCTTCTTCATA
GTTATACCAATTATAATTGGAGGATTCGGAAATTGATTAATTCCCCTAATAATTGGGTCGCCTGATATAGCATTTCCTCG
AATAAATAACATAAGATTTTGACTTCTTCCTCCTTCCTTATCCCTTCTTCTAATATCCTCTATGTCTAACAGAGGAACTG
GAACAGGATGAACAGTTTATCCCCCTCTATCAACCGGACTTTCCCATTCAGGAGCATCTGTTGATTTAACTATTTTTTCT
CTTCACTTAGCAGGAATTTCCTCTATTCTAGGAGCTATTAACTTCATATCAACTATCATCAATATACGAAACCCCAATAT
ATCCTTCGAACGGATTCCTCTGTTTGTATGATCTGTATTCATCACGGTACTCCTCCTCCTATTGTCTCTTCCTGTTCTTG
CAGGAGCAATTACTATACTTTTAACAGATCGAAACTTCAATACTTCCTTTTTTGACCCAATAGGAGGAGGAGACCCTATT
TTATATCAACATTTATTT
>CNPPH1078-12|Scheloribatidae|COI-5P|KJ444290
AACACTATATTTTATCTTTGGAGCCTGGGCCGGGATCATGGGATCAGCCCTCAGGGGGTTGATTCGATTGGAACTTGCTC
AGCCTGGCTCCCTTTTGGAAAATGACCAAATCTACAACACAATTGTGACTGCCCACGCCTTCGTGATAATCTTTTTTATA
GTAATGCCTGTCATAATTGGAGGATTTGGGAACTGACTAATTCCCATAATGGTAGGAACCCAAGATATGGCGTTCCCACG
AATAAACAATATAAGATTCTGGCTTTTACCCCCATCCCTGGCGTTACTCTCAGTTTCAGCTTTTGCAGGCACCGGAGCCG
GTACCGGTTGAACTGTTTATCCCCCCTTGGCCAACAATTTATTTCATTCGGGAATTTCAGTAGACTTAGCCATCTTTAGC
CTTCATTTGGCGGGGATTTCATCAATCTTAGGGGCTATCAATTTCATTTCAACCATCATCAACATACGACCACCTTTTAT
GAATTTAGACATAGTGCCCCTATTTGCTTGATCTGTCTTAATTACGGCCGTTCTTCTTCTTCTTTCTCTCCCGGTTCTTG
CTGGCGGGATCACGATGCTTCTGACAGACCGAAATTTCAACACATCCTTCTTTGAACCCTCAGGGGGTGGTGACCCTATC
CTATACCAACATTTATTT
>GMGSU001-13|Opiliones|COI-5P
GACTATATATATAATCTTAGGGGTTTGAGCAGCCATAGTAGGATCTGCACTAAGAATTCTTATCCGAACAGAATTAGGAC
AACCTGGGTCCTTAATAAATGATGACCAAATTTACAACGTTGTTGTAACTTCTCATGCCTTTGTAATAATTTTTTTTATA
GTTATGCCCATCATAATAGGAAGCTTTGGGAACTGGCTAGTGCCCCTAATACTAGGGGCACCTGATATAGCTTTTCCCCG
ATTAAACAACATAAGATTCTGGCTATTACCCCCCTCATTTGTACTTTTAATTAGTTCTACAATAGTAGAAAGAGGGGCAG
GGACAGGCTGGACCGTATACCCTCCTCTTTCAAGAAATACAGCACACAGAGGGCCCTCTGTAGATCTAACCATCTTTTCT
TTACATTTAGCAGGTATCTCCTCAATTTTAGGGGCTATTAACTTCATTACTACAGTAATAAATATACGAACAAAGGGCAT
AGTTTATGAACGTCTGCCTCTCTTTGTATGGTCAATTATTATTACGGCTGTGCTACTATTACTATCCCTGCCCGTTTTAG
CAGGGGCTATTACTATGCTTCTTACAGATCGTAACTTTAATACATCTTTCTTTGATCCAGCAGGAGGGGGGGATCC
>SPICH418-09|Hybauchenidiumgibbosum|COI-5P|GU684198
AAGTTTATATTTTATTTTTGGGGCTTGGGCTGCTATAGTAGGGACAGCAATAAGAGTATTAATTCGAATTGAGTTAGGTC
AAACTGGGAGATTATTGGGAGATGATCAATTGTATAATGTTATTGTTACTGCGCATGCTTTTGTTATAATTTTTTTTATA
GTTATACCTATTTTAATTGGTGGGTTTGGAAATTGGTTAGTGCCTTTAATGTTAGGGGCGCCTGATATAGCTTTTCCTCG
TATAAATAATTTAAGATTTTGGTTATTACCTCCTTCTTTATTATTGTTATTTATTTCTAGTATAGATGAAATAGGTGTAG
GAGCGGGGTGGACTATGTATCCTCCTCTTGCTTCTTTAGAGGGGCATTCTGGTAGATCAGTGGATTTTGCTATTTTTTCT
TTACATTTAGCTGGAGCTTCATCTATTATAGGTGCTATTAATTTTATTTCTACCATTTTAAATATGCGGGGTAGTGGAAT
GACTATAGAGAGGGTTCCTTTATTTGTTTGATCTGTTTTAATTACAGCTGTTTTGTTATTATTATCTTTACCTGTGTTAG
CAGGTGCTATTACGATACTTTTAACGGACCGAAATTTTAATACGTCATTTTTTGATCCTTCTGGGGGAGGAGATCCAGTT
TTGTTTCAGCATTTATTT
>SAMIT396-10|Trombidiformes|COI-5P|HQ972786
AACCCTTTACTTCGGATTTGGATCCTGAGCGGGGATACTAGGTGCAAGTATAAGAACTATTATCCGACTTGAATTAGGGC
AACCAGGCTCACTCTTAGGAAATGATCAAATCTATAACACAATTGTAACTGCCCATGCTTTTGTCATAATCTTTTTTATA
GTAATACCAATAATAATCGGAGGATTCGGGAATTGACTAGTTCCTCTTATATTAAGAGCTCCAGATATAGCTTTCCCACG
AATAAATAATATAAGCTTTTGACTACTTCCCCCCTCAATTATTCTTTTAACTACAAGCTCCTTAACTGCTATAGGGGCAG
GAACAGGATGAACAGTTTATCCTCCTTTATCAGGAAATTTAGCCCATAGAGGCCCATCAGTTGATTTAACTATCTTTTCC
CTCCATTTGGCTGGTGTGTCTTCTATTTTAGGAGCTATCAACTTCATAGCCACAATTTTAAATATAAAACCGAAGCATAT
AAAATTAGAACAAATACCCTTATTTGTTTGATCAATTTTTATTACTACTATTCTTCTATTACTTTCCCTCCCTGTTTTAG
CCGGGGCAATCACAATACTTTTAACAGACCGAAACTTTAATACCTCATTCTTTGACCCTGCTGGAGGAGGAGACCCTATC
CTCTATCAACACTTATTC
>FBARB102-11|Araneae|COI-5P
AACGTTATATTTAATTTTTGGTGCATGGTCTGCTATAGTTGGGATAGCTATAAGAGTTTTAATTCGGGTAGAATTAGGAC
AAACAGGAAGATTATTAGGAGATGATCATTTGTATAATGTGATTGTTACAGCTCATGCTTTTGTTATGATTTTTTTTATG
GTTATACCTATTATGATTGGGGGATTTGGAAATTGAATGGTTCCATTAATATTAGGAGCTCCGGATATAGCTTTTCCTCG
AATAAATAATTTAAGTTTTTGATTATTACCTCCTTCTTTATTTTTATTATTTATTTCTTCTATAGTAGAAATAGGAGTTG
GAGCAGGATGAACAATTTATCCTCCTTTAGTTTCTTTAATTGGACATTCAGGAAGATCTGTAGATTTTGCTATTTTTTCT
TTGCATTTAGCTGGAGCTTCTTCAATTATGGGAGCTGTTAATTTTATTTCAACTATTATTAATATACGGTTAATTGGAAT
GAGAATAGAAAAGATTCCTTTATTTGTTTGATCAATTTTTATTACTGTAATTTTATTATTATTATCATTACCTGTTTTAG
CGGGTGCTATTACTATATTATTGATGGATCGAAATTTTAATACTTCTTTTTTTGATCCTGCTGGGGGTGGGGATCCTATT
TTATTTCAACATTTATTT
>BBUSE491-11|Araneae|COI-5P
TACTTTATATTTAATTTTTGGAGCTTGAGCAGCTATAGTAGGAACAGCAATAAGTGTATTAATTCGAATTGAATTAGGTC
AACCTGGTAGATTTATAGGGGATGATCAACTTTATAATGTAATTGTGACTGCACATGCATTTGTAATAATTTTTTTTATA
GTGATGCCAATTTTAATTGGCGGTTTTGGAAATTGATTAGTTCCTTTGATATTAGGTGCACCTGATATAGCATTTCCTCG
AATAAATAATTTAAGATTTTGATTACTTCCCCCTTCTTTATTTCTTTTGATTGTTTCTTCTATAGTTGAAATGGGTGTAG
GTGCTGGTTGGACTGTATATCCTCCTTTAGCTGGTCTAGAAGGGCATGCTGGGAGGTCTGTAGATTTTGCAATTTTTTCT
TTACATTTAGCTGGGGCTTCATCTATCATGGGTGCAATTAATTTTATTTCTACAATTATTAATATGCGATTTTATGGTAT
AACAATAGAAAAGGTTCCTTTATTTGTATGATCAGTATTGATTACAGCTGTTTTATTATTACTTTCTTTACCTGTATTAG
CAGGGGCAATTACTATATTATTAACTGATCGTAATTTTAATACATCTTTTTTTGATCCTTCCGGAGGGGGAGATCCAATT
TTATTTCAACATTTGTTT
>CHACB151-10|Scheloribates|COI-5P|HQ558434
AACTCTTTATTTTATGTTTGGTGCCTGATCAGGATTAATAGGATCAGCTTTAAGAGGTCTAATTCGACTCGAACTGGGCC
AACCGGGATCACTACTAGAAAACGATCAAATTTACAATACAATTGTCACGGCTCATGCCTTTGTTATGATTTTCTTTATG
GTAATGCCAATTATGATCGGCGGCTACGGTAATTGGTTAGTGCCCATTATAGTTGGAGCTCAAGATATAGCCTTTCCACG
AATAAACAACATAAGGTTCTGACTTTTACCGCCTTCTCTATCTCTTCTATCTCTATCTGCATTCGCATCCTCTGGTGTTG
GAACCGGATGAACGGTTTATCCGCCGTTAGCAAGCAATCTTTTTCACTCAGGAATCAGAGTTGATTTAGCAATCTTCAGC
TTACATCTAGCAGGGATCTCCTCTATTTTAGGAGCTATTAACTTTATCACAACTATTCTAAACATGCGATCTTCTTCTAT
AACACTAGATAGGATACCGCTGTTTGCATGGTCTGTGTTGATTACTGCAGTTCTTCTACTTTTATCCTTACCAGTATTGG
CAGGAGCTATCACCATACTGTTAACAGACCGAAATTTTAACACCTCATTCTTTGACCCGTCCGGCGGAGGAGATCCAATT
TTATACCAACACCTATTC
>CHACC254-10|Ameronothrusmaculatus|COI-5P|HQ941558
AACCTTGTATTTTATCTTCGGAGCTTGAGCTGGAATGATAGGATCTGCACTAAGAGGCCTAATTCGACTTGAATTAGGAC
AACCAGGATCCTTGTTAGAAAATGACCAAATTTATAATACTATTGTAACAGCACATGCCTTCGTTATAATTTTCTTTATA
GTAATACCCATTATAATTGGAGGTTTCGGAAATTGATTAGTGCCTGTGATGATCGGAGCACAAGATATAGCTTTCCCTCG
AATAAATAATATAAGATTTTGACTTCTTCCTCCTTCTCTGCTGTTACTTTCAACATCTGCTTTTGCCGGAGTGGGAGCCG
GTACAGGCTGAACAGTTTACCCTCCACTATCAGGCTCGATATTTCATTCTGGATTTTCTGTTGATTTAGCCATTTTTAGT
CTACACTTAGCTGGGGCTTCTTCTATTCTGGGGGCTATCAATTTTATTACAACTATTATAAACATACGCTCTGCTACAAT
ATCTTTAGATTCTATTCCGCTTTTTGTTTGATCTGTTTTGATCACAGCTGTTCTACTACTTCTTTCTCTTCCTGTGTTAG
CAGGAGCAATCACTATACTCCTTACAGACCGTAATTTTAACACCTCATTCTTTGATCCTTCAGGAGGAGGAGACCCTATT
TTATATCAACATTTATTT
>BBUSE1963-12|Araneae|COI-5P
AACTTTATATCTAATTTTTGGAGCTTGAGCAGCTATAGTTGGGACGGCAATAAGAGTATTGATTCGAATAGAGTTAGGTC
AAACGGGAAGTTTTTTAGGTAATGAACATTTATATAATGTAATCGTTACTGCTCATGCTTTTGTCATAATTTTTTTTATA
GTAATACCTATTTTGATTGGGGGATTTGGAAATTGATTAGTTCCTTTAATATTAGGGGCTCCTGATATAGCTTTTCCTCG
TATAAATAATTTAAGTTTTTGATTATTACCCCCTTCTTTAATATTATTATTTATTTCTTCTATAGCTGAAATAGGAGTGG
GTGCAGGCTGAACTGTTTATCCTCCTTTAGCATCAATTGTAGGTCATAATGGAAGATCTGTTGATTTTGCTATTTTTTCT
TTGCATTTAGCTGGTGCTTCGTCAATTATAGGTGCTATTAATTTTATTTCTACAGTAATTAATATACGATCAGTAGGGAT
ATCTATAGATAAGATTCCGTTATTTGTATGATCAGTGGTTATTACTGCTGTTTTATTATTATTATCTTTACCTGTTTTAG
CAGGTGCTATTACTATGTTATTGACTGATCGAAATTTTAATACCTCTTTTTTTGATCCTGCGGGTGGTGGGGATCCTATT
TTATTTCAACATTTATTT
>SSEIB4230-13|Sarcoptiformes|COI-5P
AACTCTATATTTTGTTTTTGGGGCTTGAGCCGGAATTTTGGGATCTGCCCTAAGAGGATTAATCCGTTTAGAACTTGGTC
AACCGGGCTCATTATTAGAAAATGACCAAATTTACAACACTATTGTTACTGCGCACGCTTTCGTTATAATTTTTTTTATA
GTTATGCCTGCGATAATTGGCGGATTTGGAAACTGATTGGTACCCATAATAATTGGAGCTCAGGATATGGCGTTTCCACG
AATAAACAATATGAGATTCTGACTCCTACCACCTTCTTTAACATTACTTTCTGCTTCTGCTTTTGCCGGGGTTGGGGCTG
GTACGGGGTGAACCGTGTATCCCCCCCTTTCTGGAAATTTATTCCATTCGGGAATTTCAGTGGACTTAGCTATTTTTAGA
CTGCATCTTGCAGGGGCTTCCTCTATTCTGGGAGCGATCAATTTTATTACAACAATTCTAAATATACGATCTTCATCATT
ATCTCTAGATTCCATCCCACTCTTCGTATGATCCGTATTAATCACCGCCGTGTTACTGCTTTTATCTTTACCAGTACTGG
CAGGAGCTATCACAATACTTTTAACAGATCGAAACTTCAATACCTCATTCTTTGATCCTTCGGGGGGCGGAGATCCAA
>ARONT132-09|Lepthyphantesleprosus|COI-5P|GU682632
AACCCTGTATTTTATTTTTGGGGCTTGGTCTGCTATAGTAGGGACTGCTATAAGAGTATTAATTCGAATTGAGTTAGGAC
AAACAGGAAGAATGCTAGGTGATGATCAGGTGTATAATGTAATTGTAACAGCTCATGCATTTGTAATAATTTTTTTTATA
GTTATACCAATTTTAATTGGTGGATTTGGAAATTGGTTAGTTCCTTTAATGCTTGGGGCGCCAGATATAGCTTTTCCACG
TATAAATAATTTAAGATTTTGACTTCTTCCCCCTTCTCTTTTGTTGTTATTTATTTCAAGAATAGTTGAAATAGGGGTAG
GGGCAGGATGAACAGTTTATCCTCCTCTTGCTTCTTTAGAAGGGCATGCTGGGAGATCTGTGGATTTTGCTATTTTTTCT
CTTCACTTAGCTGGAGCTTCTTCTATTATGGGGGCGATTAATTTTATTTCTACAATTATTAACATGCGGGGGTATGGAAT
ATCTTTAGAAAAAATTCCTTTATTTGTGTGATCAGTTTTGATTACAGCTGTTTTATTATTATTATCTTTGCCTGTTTTAG
CAGGGGCGATTACAATGTTGTTAACTGATCGTAACTTTAATACTTCTTTTTTCGACCCAGCTGGGGGTGGGGATCCTGTT
CTATTTCAACATTTATTT
>BBUSE152-11|Araneae|COI-5P
TAGATTATATTTTGTTTTTGGAGTTTGATCTGCTATAGTAGGAACTGCTATAAGAGTATTAATTCGAATTGAATTAGGAC
AATCAGGAAGATTTTTAGGAAATGATCAATTATATAATGTAATTGTCACTGCTCATGCTTTTGTTATGATTTTTTTCATG
GTTATACCTATTTTAATCGGGGGGTTTGGAAATTGGTTAGTCCCTCTTATATTAGGGGCTCCAGATATAGCTTTCCCCCG
TATGAATAATTTAAGTTTTTGACTTTTACCTCCTTCTCTTTTTATATTATTTATTTCTTCTATGGTGGATATAGGGGTAG
GAGCTGGTTGAACTGTTTATCCACCTCTTGCTTCTTTAGAAGGACATCCTGGAAGATCTGTGGATTTTGCTATTTTTTCT
TTACATTTAGCTGGGGCTTCATCTATTATGGGGGCTATCAATTTTATTTCAACTATTATTAATATGCGAATAAGAGGAGT
TTCAATAGAGAAGGTCCCTCTTTTTGTCTGGTCTGTTTTGATTACTGCTGTGTTATTATTGCTATCTTTACCAGTTTTAG
CTGGAGCTATTACTATGCTATTAACAGATCGAAATTTTAATACTTCTTTTTTTGACCCTTCTGGGGGAGGGGATCCCGTT
TTGTTCCAGCATCTGTTT
>MASPD1079-12|Araneae|COI-5P
GACTTTGTATTTAATTTTTGGTGTTTGGGCAGCGATAGTTGGAACTGCTATAAGTGTATTGATTCGTGCTGAATTAGGGC
AATGTGGGAGATTATTAGGGGATGATCAGTTGTATAATGTAATTGTTACGGCTCATGCTTTTGTTATGATTTTTTTTATA
GTTATACCTATTTTGATTGGAGGGTTTGGGAATTGGTTGGTGCCATTAATATTAGGGGCTCCTGATATGGCTTTTCCTCG
AATGAATAATTTGAGTTTTTGACTTCTTCCTCCTTCTTTAATAATGTTGTTTGTTTCTTCAATAGTGGAAATAGGGGTAG
GAGCAGGTTGGACTGTTTATCCTCCTTTGGCTTCTGTTATAGGGCATGCTGGTAGATCTGTAGATTTTGCTATTTTTTCT
TTACATTTGGCTGGGGCATCATCTATTATAGGAGCTATTAATTTTATTTCTACTATTATTAATATACGTTCTCCCGGAAT
AAGAATGGAAAAAGTTCCTTTATTTGTTTGGTCTGTATTAATTACTGCTATTTTATTATTATTGTCTTTACCTGTTTTAG
CGGGTGCTATTACTATACTTTTGACTGATCGGAATTTTAATACTTCGTTTTTTGATCCTGCTGGTGGGGGGGATCCTGTT
TTATTTCAACATTTATTT
>HSYE073-11|Ixodida|COI-5P
AACAATATATTTAATTTTTGGTGCTTGATCAGGAATATTAGGGCTAAGTATAAGAATATTAATTCGACTTGAATTAGGAC
AACCCGGAAGACTAATTGGTAATGATCAAATTTACAATGTTATTGTAACAGCGCATGCATTTATTATAATTTTTTTCATA
GTAATACCGATTATAATTGGAGGATTTGGAAACTGGCTTGTGCCTATTATGTTAGGCGCACCCGATATGGCCTTTCCTCG
AATAAATAACATAAGATTCTGACTTCTACCCCCTTCATTATTTTTATTAATTAACTCCTCTTTAGTAGAATCAGGTGCTG
GTACCGGGTGAACAGTATACCCTCCTTTATCATCAAACTTATCTCACTATGGCCCTTCCGTAGATTTAGCTATTTTCTCC
TTACATCTTGCTGGTGCATCATCAATTTTAGGCGCAATTAATTTTATTACAACTATTTTAAACATGCGATCAATTGGAAT
AACAATAGAACGAATACCTTTATTTGTATGATCTGTATTAATTACTGCCATTCTTTTACTTTTATCCTTACCTGTTTTAG
CAGGTGCTATTACAATATTATTAACAGATCGAAATTTTAACACTTCATTCTTCGACCCTTCAGGGGGAGGGGACCCAATT
TTATATCAACATTTATTT
>CHACB1120-10|Eupodidae|COI-5P|HM907213
TACTTTATATTTTATTTTTGGCTTTTGATCAGGCCTTCTAGGAGCTTCTATAAGAATTATTATTCGAATAAAGCTTGCTA
ATCCTGGTTTTATAGGTCAAAATGATCAGATTTATAATGTTACTGTTACAGCCCATGCTTTTGTTATGATTTTTTTTATA
GTTATACCAATTATAATTGGAGGTTTTGGTAATTGATTAGTTCCTGTTATAATTGGGGCTCCTGATATAGCTTTCCCACG
TATAAATAATATAAGATTTTGATTATTACCTCCTTCTATTATAATATTATTACTTTCATCTTTTGCTGAAAGAGGAGCTG
GAACAGGATGAACTGTTTATCCACCTTTGTCGAACTATTTATTCCACGGGGGAATTTCAGTTGATTTAACAATTTTTTCT
TTACATATGGCTGGTATTTCTTCTATTTTAGGTGCTATTAATTTTATTACAACTATCATGAATATGCGGATAAGTATAAT
AACTTTTGAGCGTCTCCCTTTATTCGTTTGATCTGTTTTAATTACTGCTATTTTATTATTATTATCATTACCAGTATTAG
CAGGAGCTATCACTATACTATTAACAGATCGAAATTATAATACATCTTTTTTTGATCCTGCTGGTGGTGGAGATCCTATT
TTATATCAACATTTATTT
>PPELE005-11|Araneae|COI-5P|JN308316
TACGTTATATTTAATTTTTGGAGTTTGATCTGCTATAATTGGTACAGCTATGAGTGTTTTAATTCGAATAGAATTAGGAC
ATCCAGGAAGTTTATTAGGAGATGATCATTTATATAATGTTATGGTTACTGCTCATGCTTTTGTTATAATTTTTTTTATA
GTAATACCTATTTTAATTGGTGGTTTTGGAAATTGATTAGTTCCTTTAATATTAGGAGCTCCTGATATATCATTTCCTCG
AATAAATAATTTGTCTTTTTGATTATTACCACCTTCTTTATTTTTATTATTAATATCTTCAATAGTTGAAATAGGAGTTG
GAGCAGGATGAACAGTTTATCCTCCTTTAGCATCTAGAATTGGGCATATAGGAAGTTCAATAGATTTTGCTATTTTTTCT
TTACATTTAGCAGGTGCTTCTTCTATTATAGGGGCAGTAAATTTTATTTCTACTATTATAAATATACGTTTAATAGGGAT
AAATATAGAAAAAATTCCATTATTTGTATGATCTGTGCTTATTACTGCTGTTTTATTATTATTATCATTACCAGTATTAG
CTGGAGCTATTACTATATTACTTACTGATCGAAATTTTAATACATCATTTTTTGATCCTGCTGGAGGAGGAGATCCTATT
TTATTTCAACATTTGTTT
>ETKS106-12|Araneae|COI-5P
TACTTTATATTTAGTATTTGGAGCATGGGCTGCAATAATAGGAACAGCTATAAGAGTTTTGATTCGAATTGAATTAGGTC
AACCAGGAAGATTTATTGGTGATGATCAATTGTATAATGTAATTGTTACTGCACATGCTTTTGTAATAATTTTTTTTATA
GTAATACCTATTTTAATTGGAGGTTTTGGAAATTGATTGGTTCCTTTAATATTAGGAGCACCTGATATAGCATTTCCACG
AATAAATAATTTAAGATTTTGATTATTACCCCCTTCATTATTTTTATTAGTAATTTCATCATTAGTAGAAATAGGGGTTG
GGGCAGGATGAACGGTATACCCTCCGTTGGCTGGATTAGAAGGTCATGCTGGAAGATCTGTAGATTTTGCTATTTTTTCT
TTACATTTAGCGGGAGCTTCATCAATTATAGGGGCTATTAATTTTATTTCAACTATTATTAATATACGATTTTATGGGAT
AACTATAGAAAAGGTTCCTTTGTTTGTTTGATCAGTATTAATTACAGCTGTATTATTATTACTATCATTACCTGTTTTAG
CGGGGGCTATTACTATATTACTAACTGATCGAAATTTTAATACATCTTTTTTTGATCCTTCTGGAGGAGGAGATCCTATT
TTGTTTCAACATTTGTTT
>OPILI321-11|Opiliones|COI-5P
AACTATATATATAATCTTTGGTATGTGAGCTGCTATAATTGGGTCAGCTTTAAGAATCTTAATTCGAACCGAATTAGGAC
AACCAGGGTCACTAATAAATGATGATCAAATCTATAATGTAGTAGTTACCGCTCATGCTTTTGTAATAATTTTTTTTATA
GTAATACCTATTATAATTGGAGGTTTTGGAAACTGACTTGTCCCTTTAATATTAGGAGCACCCGATATAGCTTTTCCTCG
CTTAAATAATATAAGCTTTTGGCTCCTACCTCCTTCATTTCTCCTCCTACTATCCTCAACTATAGTGGAAAATGGAGCAG
GAACAGGATGGACTGTCTACCCCCCTCTATCTAGAAATATTGCACATACGGGGGCTTCTGTGGACCTAACAATTTTTTCC
TTACACTTAGCAGGAATTTCATCAATTTTAGGAGCTATTAATTTTATCACCACTATTATTAATATACGCACACAAGGAAT
AATTATAGAACGAATACCTCTCTTTGTTTGATCTGTAAAAATTACAGCAATCCTACTACTATTATCATTACCAGTTTTAG
CTGGTGCAATTACGATACTTCTAACAGATCGAAATTTTAATACCTCCTTCTTTGACCCCTCTGGAGGAGGAGACCCTATC
TTATACCAACATTTATTT
>SPICH1133-09|Zygiellanearctica|COI-5P|GU684586
GACTTTATACTTGGTTTTTGGTGCTTGAGCGGCTATGGTTGGGACTGCAATAAGTGTTTTAATTCGAATTGAGTTGGGGC
AATCTGGTAGATTTATGGGAGATGATCAGTTGTATAATGTTATTGTAACTGCTCATGCTTTTGTTATAATTTTTTTTATG
GTTATGCCTATTTTGATTGGGGGTTTTGGTAATTGACTGGTTCCTTTGATGTTGGGGGCTCCTGATATGGCTTTTCCTCG
CATGAATAATTTAAGGTTTTGATTATTGCCTCCTTCTTTATTTTTATTATTTATTTCTTCTATGGTGGAAATAGGGGTTG
GGGCTGGTTGAACGATCTACCCTCCTTTAGCGTCTCTAGAGGGACATTCAGGAAGTTCGGTTGATTTTGCCATTTTTTCT
TTGCATTTGGCTGGGGCCTCTTCTATTATAGGGGCTATTAATTTTATTTCTACAATTTTGAATATACGGTCTTATGGGAT
GTCTATGGAAAAAGTTCCTTTGTTTGTTTGGTCGGTTTTAATTACTGCTGTTTTGCTCCTATTATCACTTCCGGTTTTAG
CTGGGGCTATCACTATGTTATTAACTGATCGAAATTTTAATACATCGTTTTTTGATCCTTCGGGGGGAGGGGATCCTATT
TTATTTCAGCATTTATTT
>SMTPB10811-13|Arctoseius|COI-5P
ACTCTATATTTTTTATTTGCTAGTTGAGCTGGGATAGTGGGCTCCTCTATAAGCCTATTTATCCGAATCGAACTCTCCCA
GCCAGGATCTTTCATCGGAGATGACTCTATTTACAATGTTATTGTCACAGCCCATGCTTTTGTTATAATTTTTTTTATAG
TAATGCCCGCCATAATTGGGGGGTTCGGAAATTGATTAGTCCCTTTAATAATTTCAGCCCCAGATATGGCTTTCCCCCGA
ATAAATAATATAAGATTTTGGCTCCTCCCCCCCTCCTTGCTGCTTCTTTTATGCTCCAGCTTCGTAGACAGAGGAGCGGG
CACTGGATGGACTGTCTACCCCCCTCTAGCAGGGAACATGGGACACAGAGGAGTTTCTGTGGACCTAGCCATTTTTAGCC
TTCATCTAGCTGGGGCTTCTTCGATTCTTGGGGCTATTAATTTTATTTCAACAATTTTAAATATACGAAGAAAGAGTATA
AACCTAGAACGGATACCTTTATTTGTTTGGTCTGTTTTTATCACCGCTATTTTACTCTTATTAAGTCTGCCTGTTTTAGC
TGGAGCTATCACCATACTTTTGACAGATCGTAATTTTAACACCACA
>ABPVM017-10|Ixodida|COI-5P|HM919037
AACAATATATTTAATTTTTGGAGCTTGAGCAGGAATATTAGGATTAAGAATAAGAATTTTAATTCGAATAGAACTTGGCC
AACCAGGAACTTTAATTGGAAACGATCAAATTTATAATGTAATCGTAACTGCACACGCTTTTATTATAATTTTCTTTATA
GTAATACCTATTATAATTGGTGGTTTTGGGAATTGACTAGTTCCTCTAATACTAGGGGCTCCTGATATAGCATTTCCTCG
AATAAATAACATAAGATTTTGATTATTGCCTCCGTCATTATTTTTACTAATCAATTCATCCTTAGTCGAAAGAGGAGCCG
GAACAGGATGAACTGTATACCCTCCACTATCATCAAATTTATCACATTATGGCCCTTCAGTAGATATAGCAATCTTTTCC
CTTCATTTAGCGGGAGCTTCTTCAATTTTAGGTGCAATTAATTTCATTACTACTATTATTAATATACGATCTCTAGGAAT
AACTTTAGAGCGTATACCTTTATTTGTATGGTCTGTTTTAATTACAGCCATTTTACTATTATTATCCTTACCTGTTTTAG
CAGGTGCTATTACCATATTATTAACTGATCGAAATTTTAATACTTCATTCTTCGATCCATCCGGAGGTGGAGATCCAATT
TTATATCAACACTTATTT
>CHACA1090-10|Penthaleidae|COI-5P|HM907130
AACTTTATACTTCGGATTTGGAATATGAGCAGCAATACTAGGATCTTCTATAAGAATTTTAATTCGAATAAAACTAGGAA
ATCCATCTTTAATAGAACAAAATGATCAAATCTATAATGTAATTGTAACTGCTCACGCTTTTGTAATAATTTTCTTTATA
GTAATACCAATTATAATTGGAGGATTTGGAAATTGACTTGTTCCTATAATAATTAGAGCTCCTGATATAGCTTTCCCACG
AATAAATAATATAAGATTTTGATTACTTCCTCCATCTTTAATATTATTAATTTTATCTACTTTTACTGACTATGGAAGAG
GAACAGGGTGAACAATTTATCCACCCCTATCAAGACAAATATTTCATAATGGAACATCAGTAGACTTAACTATTTTTTCA
CTTCACATAGCAGGAGTCTCATCAATTTTAGGAGCTATTAACTTTATCACAACAATTTTAAATATACGAAATAAAATAAT
AAATTTCGAACGAATACCATTATTTGTATGATCTGTAATAATTACAGCTATTTTACTACTTTTAGCATTACCAGTACTAG
CAGGAGCAATTACTATACTATTAACTGATCGAAATTTTAATACATCATTTTTTGACCCTGCAGGAGGTGGAGACCCAATT
TTATATCAACATCTATTT
>BBUSE354-11|Araneae|COI-5P
AACTTTGTATTTAATTTTTGGTGTATGGTCAGCTATAGTAGGTACAGCTATAAGTGTATTAATTCGAATGGAATTAGGGC
AAACTGGTAGATTTTTAGGTAATGATCATATGTATAATGTGATTGTTACTGCTCATGCATTCGTTATAATTTTTTTTATA
GTTATACCAATTATAATTGGTGGTTTTGGAAATTGATTGGTTCCTTTAATATTAGGAGCTCCTGATATAGCTTTTCCTCG
TATGAATAATTTAAGATTTTGATTATTACCTCCTTCTTTAATATTATTATTTATTTCGTCTATAGCTGAAATAGGAGTGG
GAGCTGGATGAACGGTATATCCTCCTTTAGCTTCTATTGTTGGACATAATGGAAGATCTGTAGACTTTGCTATTTTTTCG
TTGCATTTAGCTGGAGCTTCATCAATTATAGGAGCTATTAATTTTATTTCTACAGTTGTTAATATACGTTCTGTAGGAAT
AAGATTAGATAAAATTCCTTTATTTGTTTGATCTGTGGTGATTACAGCTGTTTTGTTATTATTATCATTACCTGTATTGG
CAGGTGCTATTACTATGTTGTTAACTGATCGAAATTTTAATACTTCGTTTTTTGATCCTGCTGGAGGAGGGGATCCTGTT
TTATTTCAGCATTTATTT
>MYMCC214-11|Heminothruslongisetosus|COI-5P|JX838776
GACTCTATACTTCATTTTTGGTACATGAGCTGGTCTCATAGGATCTTCCTTAAGAGCACTCATTCGATTAGAGTTAGGCC
AGCCAGGATCTTTAATAGATAACGACCAAATTTACAACACAATCGTCACCGCTCATGCCTTCGTCATAATCTTCTTCATA
GTCATACCAGTTATAATTGGAGGATTCGGAAATTGATTAGTCCCTCTTATAATCGGGGCACAAGATATAGCTTTCCCACG
AATAAACAACATAAGGTTTTGGCTTCTACCACCATCCCTTTGTCTTCTATCAGCATCCGCCTTCGCGGGAATAGGGGCAG
GAACAGGATGAACCGTGTATCCACCCCTAGCAGGCAATCTCTTTCACTCAGGTTTCTCAGTGGACTTAGCCATTTTTAGA
CTCCATTTAGCCGGTGCGTCCTCCATTCTGGGGGCCATCAATTTCATCACCACCATCCTAAATATACGATCTTCCACCAT
GAGACTAGACTCAATTCCCCTATTCGTGTGGTCGGTTCTCATCACTGCCGTTCTTCTCCTATTAGCCCTTCCAGTGCTAG
CTGGGGCCATCACTATGTTATTAACGGACCGAAACTTTAATACTACGTTTTTCGATCCTGCGGGAGGGGGGGATCCAATC
CTATACCAACATCTATTT
>GMGSI427-13|Opiliones|COI-5P
AACTATATACATAATCCTAGGGGTTTGAGCAGCCATAGTAGGGTCAGCTCTAAGAATTCTTATTCGAACAGAGTTAGGCC
AACCAGGGTCACTGATAAATGACGACCAAATCTACAACGTAGTTGTTACTTCCCATGCTTTTGTAATAATTTTCTTCATA
GTTATGCCCATTATGATAGGAAGTTTTGGAAACTGGCTAGTCCCTTTAATACTAGGGGCCCCAGATATAGCCTTCCCCCG
ATTAAACAATATAAGATTTTGGCTCCTACCTCCTTCATTCATTCTTCTAATCAGCTCTACAATAGTAGAAAGAGGGGCAG
GAACAGGATGAACTGTCTATCCCCCCCTTTCAAGAAATACCGCTCATAGAGGGCCCTCAGTAGACCTAACTATTTTCTCT
CTGCATTTAGCAGGAATCTCCTCAATTTTAGGGGCTATCAATTTTATTACTACTGTAATGAACATACGAACAAAGGGAAT
AGTATATGAACGTCTACCCCTCTTTGTATGATCTATCATTATTACTGCTGTTCTTCTATTGCTGTCACTTCCAGTCTTAG
CAGGGGCTATTACTATACTCCTCACAGATCGAAATTTCAACACATCCTTCTTCGACCCGGCAGGAGGAGGGGACCC
>RBINA5188-13|Phrurotimpusborealis|COI-5P
ACTTTATATTTATTGTTTGGTTCGTGATCAGCGATAGTTGGTACTGCTATAAGTGTAATTATTCGAATGGAATTAGGACA
GGTAGGTAGATTATTAGGAGATGATCATTTATATAATGTGATTGTAACAGCACATGCTTTTATTATAATTTTTTTTATAG
TTATACCTATTTTAATTGGGGGTTTTGGAAATTGATTAATTCCTTTAATATTAGGAGCACCTGATATAGCTTTTCCTCGA
ATGAATAATTTAAGATTTTGATTATTACCCCCATCATTAATTTTGTTATTTATTTCTTCTATAGCTGAGATAGGAGTTGG
AGCAGGGTGAACCGTTTATCCACCATTAGCTTCTAGAGTTGGACATTCTGGGAGTGCTATGGATTTTGCTATTTTTTCTT
TACATTTAGCTGGTGCTTCATCGATTATAGGTTCTATCAATTTTATTTCTACTATTATTAATATGCGTTCTTATGGGATG
AGAATAGAAAAGGTATCTTTATTTGTATGATCAGTTTTTATTACTACTATTTTATTATTATTATCTTTGCCTGTTTTAGC
AGGTGCTATTACTATGTTATTAACTGATCGAAATTTTAAT
>SPIEU933-10|Araneae|COI-5P|HQ975483
GACTTTGTATTTAATATTTGGAGTATGATCAGCTATAGCTGGAACTGCTATAAGAGTATTGATTCGGATGGAATTAGGAA
ATTCTGGTAGTTTATTAGGAGATGATCATTTATATAATGTTATTGTAACTGCTCATGCTTTTGTTATAATTTTTTTTATA
GTTATGCCAATTTTAATTGGAGGGTTTGGAAATTGGTTAGTTCCTTTAATACTAGGAGCTCCTGATATATCATTTCCTCG
AATAAATAATCTTTCTTTTTGATTATTACCTCCTTCTTTATTTTTGTTATTTATATCTTCTATAGTGGAAATAGGAGTTG
GAGCTGGATGAACAGTTTATCCTCCTTTAGCTTCTAGAGTAGGGCATATAGGAAGTTCTATAGATTTTGCTATTTTTTCT
CTTCATTTAGCTGGGGCTTCTTCTATTATAGGAGCGGTAAATTTTATTTCTACTATTATTAATATACGTTTAGTTGGAAT
AACAATAGAAAAAGTGCCTTTATTTGTATGATCTGTATTAATTACTGCTATTTTATTACTATTATCTCTTCCTGTTTTAG
CAGGAGCTATTACTATATTATTAACTGATCGTAATTTTAATACTTCTTTTTTTGATCCTGCTGGGGGAGGGGATCCAATT
TTATTTCAACATTTATTT
>SPICH824-09|Sitticusfloricolapalustris|COI-5P|GU684425
GACTTTATATTTAATTTTTGGTGCTTGATCTGCTATAGTAGGTACGGCAATAAGAGTTTTAATTCGAATAGAGTTAGGTC
AAACTGGTCATTTTTTAGGGAATGATCATTTGTATAATGTAATTGTTACTGCTCATGCTTTTGTAATAATTTTTTTTATA
GTTATACCAATTTTAATTGGTGGTTTTGGAAATTGATTAGTTCCTTTAATATTAGGAGCTCCTGATATAGCTTTTCCCCG
AATAAATAATTTAAGATTTTGATTATTACCCCCTTCATTATTTTTATTATTTATTTCATCTATAGCTGAAATAGGAGTAG
GGGCAGGTTGAACTGTTTATCCTCCTTTGGCTTCTATTGTAGGTCATAATGGTAGTTCTGTGGATTTTGCTATTTTCTCT
TTACATTTAGCTGGAGCTTCTTCTATTATAGGTGCTATTAATTTTATTTCAACTGTGATTAATATACGATCAGTGGGGAT
GTCTATAGATAAAATTTCCTTATTCGTATGATCTGTTATTATTACTGCTGTATTATTATTATTGTCTTTACCTGTTTTAG
CAGGAGCTATTACTATATTATTAACTGATCGTAATTTTAATACTTCTTTTTTTGATCCTGCTGGAGGAGGTGATCCTATT
TTGTTTCAACATTTATTT
>SPICA675-10|Araneae|COI-5P|JF885856
GACTTTATATTTAATTTTTGGGTCTTGATCAGCTATAGTTGGGACTGCAATAAGAGTATTAATTCGAGTTGAGTTAGGTC
AATCTGGAAGATTTTTAGGGGATGATCATTTATACAATGTAATTGTAACAGCTCATGCTTTTGTTATGATTTTTTTTATA
GTTATACCTATTTTGATTGGGGGATTTGGGAATTGATTATTACCTTTAATACTAGGGGCGCCAGATATAGCTTTTCCTCG
GATAAATAATTTTAGATTTTGATTATTACCTCCTTCTTTATTATTTTTATTTATTTCATCTATGGTTGAAATAGGGGTGG
GTGCTGGATGAACTATTTATCCCCCTTTAGCTTCTATTGTAGGACATTCTGGAAATTCTATAGATTTTGCTATTTTTTCT
TTACATTTAGCTGGGGCTTCGTCAATTATAGGAGCTGTAAATTTTATTTCTACAATTATTAATATACGTTCTTTTGGGAT
AAGAATGGAAAAAATTCCATTGTTTGTCTGATCAGTTTTAATTACAGCTGTTTTATTATTATTATCTTTACCTGTTTTAG
CAGGAGCTATTACTATATTATTAACTGACCGAAATTTTAATACTTCATTTTTTGATCCAGCAGGGGGAGGTGATCCTATT
TTATTTCAACATTTATTT
>CHACB093-10|Alycidae|COI-5P|HQ558392
TACTATATATTTTATTTTAGGTTTATGAGCAGGAATTTTAGGTTCATTTTTAAGAGGTTTGATTCGTTTAGAACTTGGTC
AGCCTGGAGTTCTTTTAGGAAGAGATCAAATTTATAATGTTATTGTTACTTCTCATGCTTTTATTATAATTTTTTTTATA
GTTATGCCTATTATAATTGGGGGTTTTGGAAATTGATTAGTTCCTTTGATAATTGGTGCTCCTGATATAGCTTTTCCTCG
AATAAATAATATGAGATTTTGGTTACTACCTCCTTCAATAATTTTATTGTTAGGTTCTTCTTTTGTTAGTTTAGGAGTTG
GTACAGGTTGAACTGTTTATCCTCCTTTATCATCAAATTTATCTCATTTAGGTTCTTCAGTAGATTGAGCTATTTTTTCT
TTACATTTAGCTGGAGTTTCTTCTATCTTAGGTTCAATTAATTTTATTTCTACTATTATAAATATACGTTTAATTGGAAT
GAGATTAGAATTAGTTCCTTTATTTGTTTGATCAGTATTATTTACTACTATTTTATTGTTGTTATCTTTACCTGTTTTAG
CAGGAGCTATTACTATACTATTAAGAGATCGAAATTTTAATACTTCTTTTTTTGATCCTGTTGGGGGAGGAGATCCTATT
TTGTATCAACATTTATTT
>CNPAK655-13|Arachnida|COI-5P
AACACTTTACTTTATTTTTGCAGCCTGAGCTGCTATAATTGGAACCTCTTTAAGTATAATCATTCGAATTGAACTAGGAC
AACCAGGTTCTTTAATTGGAGATGATACAATTTACAATGTAGTAGTTACCGCCCATGCTTTCATTATAATTTTCTTTTTA
GTTATACCCGCTATAATTGGGGGGTTTGGAAATTGACTAGTGCCTATAATAGTTTCTTCCCCAGATATGGCTTTCCCACG
AATAAACAATATAAGATTTTGATTGCTACCCCCTTCATTCTCCTTACTACTAATATCATCTATAGTTAATAACGGAGTTG
GAACAGGATGAACTCTTTATCCCCCCTTAGCAGGGAACATATCCCACAGAGGAATAGCTGTAGATCTAGCTATTTTTAGA
CTACACCTAGCAGGAGTAAGCTCTATTTTAGGGTCTATTAATTTCATCTCTACAATCATAAATATACGAGCAAAATTTAT
AACTTTAGACCGAATGCCTTTATTTGTATGATCTGTATTTATCACTACAATCCTTTTACTTTTAAGCCTCCCTGTTTTAG
CAGGAGCAATTACAATACTTCTCACGGACCGAAACTTTAATACTAGATTTTTTGACCCAAGAGGGGGA
>MYMCC711-11|Nanorchestes|COI-5P|JX837503
TACTTTATATTTGATTTTTGGTGTCTGGGCTGCTTTTTTTGGGTCTTCTTTAAGTTATATTATTCGTTTAGAATTGAGTC
AACCTGGGGGCTTTATTTCTTCAGATCATTTTTATAATGTTGTTGTTACTTCTCATGCTTTTGTAATAATTTTTTTTGCA
GTTATGCCTGTTATAATTGGAGGGTTTGGGAACTGGCTAGTTCCTTTAATAATTGGAGCACCTGATATAGCTTTTCCTCG
TATAAATAATATAAGTTTTTGGTTGCTTCCTCCCTCTTTATTTATATTGGTATTTTCTTCGATAGGAGCGGGGGCGGGAA
CAGGTTGAACGGTATATCCTCCTTTGTCTTCTTTTTTAGGGCACAATAATTCTTCTGTAGACTTTACTATCTTTTCTTTA
CATTTAGCAGGTATTTCTTCTATTTTAGGTGCTGTTAATTTTATTTGTACTATTTTTAACATACGTGTTTTAGGTTCTGG
ATTTGAGAAAATTACTTTGTTCGTTTGGTCTGTTCTTGTAACTGCTGTTTTATTACTTTTATCACTACCTGTCTTAGCAG
GCGCTATTACCATACTTTTAACTGACCGTAATTTTAATACCTGTTTTTTTGACCCATCAGGTGGGGGGGACCCTATTTTG
TATCAACATTTATTT
>MYMCC937-11|Brachychthoniidae|COI-5P|JX836865
AACTCTCTATTTTATTTTCGGTATCTGGGCTGGGTTACTAGGTTCCAGCTTAAGGATACTTATTCGAGTTGAGCTGGGCC
AACCTGGATCTTTGTTGGAAAACGATCATATTTATAACGTTATTGTTACTGCTCATGCTTTTGTTATGATTTTTTTTATA
GTTATGCCAATTATAATTGGAGGTTTTGGCAATTGGCTTGTTCCTTTGATAATTGGAGCTCCTGACATAGCATTTCCTCG
GATAAATAACATAAGGTTTTGGTTGCTTCCTCCCTCTTTATCTTTATTAGCTATTTCTTCCTACTCTGGAACCGGAGCCG
GCACAGGATGAACTGTTTATCCTCCTCTTTCTGACTATGTCTATCATATGAATAATAGAGTTGACTTAGCTATCTTTAGC
CTGCATCTTGCAGGGGCCTCTTCAATTTTAGGAGCTATCAATTTTATCACTACTATCATTAACATACGAGGTTTGAGCAC
TAACTTAGATAACGTACCTCTTTTTGTTTGGTCCGTTTTTATTACTGCTATTTTACTACTTCTTTCTCTTCCTGTGTTAG
CGGGTGCTATTACTATATTATTAACTGATCGTAATTTTAATACTACGTTTTTTGATCCTTCTGGAGGAGGTGACCCTATT
CTTTACCAACATTTGTTT
>ARSO315-08|Araneae|COI-5P
AACTTTATATTTAATTTTTGGTGCGTGGGCAGCTATAGTTGGAACTGCAATAAGTGTATTAATTCGTATGGAGTTAGGTC
AAGTTGGTAAATTTTTAGGCGATGATCATTTATATAATGTAATTGTTACTGCTCATGCATTTGTTATGATTTTTTTTATA
GTTATGCCTGTTTTGATTGGAGGATTTGGTAATTGATTAGTTCCTTTAATGTTAGGGGCTCCTGATATGGCTTTTCCTCG
TATAAATAATTTAAGTTTTTGATTACTTCCACCTTCATTATTATTATTATTTATTTCATCAATAGTAGAAATAGGAGTTG
GAGCAGGATGAACTGTTTATCCTCCATTAGCATCATTAATAGGACATGCTGGTAGAGCTGTAGATTTTGCAATTTTTTCA
TTACATTTAGCTGGTGCTTCATCTATTATAGGGGCTATTAATTTTATTTCAACAGTTGTTAATATACGCTCATTAGGTAT
AAGAATGGAAAAGGTTCCATTGTTTGTATGATCTGTGGTAATTACGGCTGTGTTATTATTGTTATCTCTTCCAGTTTTAG
CTGGAGCTATTACAATATTATTAACTGATCGTAATTTTAATACTTCTTTTTTTGATCCAGCTGGAGGAGGTGATCCTATT
TTATTTCAACATTTATTT
>CNEIF2378-12|Trombidiformes|COI-5P
TACTTTATATTTTATTCTAGGGGCCTGATCAGGAATAATAGGCCTCAGCCTAAGCGCTATCATTCGTATAGAGTTAGGGC
AACCAGGTCAAATAATTTCCAACGATCAAATGTACAATAGAATTGTTACAGCCCACGCCTTCATTATAATTTTCTTTATA
GTTATACCTATTATAATCGGTGGTTTCGGAAACTGGTTAGTTCCAATCATAATTGGAGCTCCAGATATAGCTTTCCCCCG
TATAAACAATATAAGCTTCTGACTTCTTCCTCCCTCTTTAATATTATTAGTTTTAGCATCATTTGTTAATATAGGAGTTG
GAACAGGGTGAACACTATATCCCCCTCTATCAAGATTTTTAGCCCACAGATACGCCTCTATTGAATTATCTATTTTTTCT
TTACATCTAGCAGGAGCTGCTTCAATTTTGGGAGCAATCAATTTTCTCACTACATTTAAAAATATAAGTAACAAAAACCT
CTGATGAGATATAATCCCTTTATTTGTATGAGCTATTATAATCACAGTTATCCTTTTATTGTTGTCGCTTCCAGTATTAG
CTGGTGCAATTACTATACTTCTCATAGACCGTAATTTTAATACTACTTTCTTCGACCCTTCAGGAGGGGGGGA
>SPIAI650-10|Araneae|COI-5P|HM384574
AAGTTTATATTTTGTTTTTGGAGCTTGAGCTGCTATAGTAGGTACGGCAATGAGAGTTTTAATTCGTATTGAGTTAGGGC
AAACTGGGAGTTTGTTGGGGGATGATCAGTTGTATAATGTTATTGTTACGGCTCATGCTTTTGTTATAATTTTTTTTATA
GTTATACCTATTTTAATTGGTGGGTTTGGCAATTGGTTGGTGCCTTTAATATTGGGGGCTCCTGATATAGCTTTTCCTCG
CATAAACAACTTGAGCTTTTGGTTATTACCCCCCTCGTTGTTGTTGTTGTTTATTTCTAGTATAGATGAGATAGGTGTAG
GTGCCGGATGAACTGTGTACCCCCCTCTTTCTTCATTGGAGGGGCATTCGGGAAGTTCAGTAGATTTTGCTATTTTCTCT
TTACATTTAGCTGGTGCGTCGTCTATTATAGGAGCTATTAATTTTATTTCTACAATTTTAAATATACGAGGATATGGTAT
GACTATAGAAAGGGTACCTTTATTTGTTTGGTCAGTTTTGATTACAGCAATTTTGTTACTATTATCGTTACCTGTATTGG
CAGGTGCTATTACTATGCTTTTAACTGATCGTAATTTTAATACATCTTTTTTTGACCCTTCAGGAGGGGGGGATCCGGTT
TTATTTCAGCATTTATTT
>TURAR1062-10|Araneae|COI-5P|HQ982574
GAGTTTATATTTAGTATTTGGGGCTTGAGCTGCTATAGTAGGGACAGCAATAAGAGTATTAATTCGAATTGAATTAGGCC
AACCTGGAAGATTTTTAGGGGATGATCAGTTGTATAATGTAATTGTGACTGCACATGCTTTTGTAATAATTTTTTTTATG
GTAATACCTATTTTGATTGGAGGATTTGGGAATTGATTAGTTCCTTTAATGTTAGGTGCTCCTGATATAGCATTTCCTCG
AATAAATAATTTAAGATTTTGATTGCTTCCTCCTTCATTAATTTTATTATTTATTTCTTCTATAGTTGAGATAGGAGTAG
GTGCGGGTTGAACTGTTTATCCACCATTATCATCATTAGATGGACATGGTGGAAGTTCAGTAGATTTTGCTATTTTTTCT
CTTCACTTAGCGGGAGCTTCATCAATTATGGGAGCGGTAAATTTTATTTCGACTATTTTAAATATACGTTCTTATGGAAT
AAGTATAGAAAAAGTTTCTTTATTTGTTTGGTCAGTATTGATTACTGCTGTTTTATTATTATTATCTTTACCGGTATTAG
CTGGTGCAATTACTATATTATTAACTGATCGAAATTTTAATACATCATTTTTTGATCCTGCTGGGGGAGGAGATCCTATT
TTGTTTCAACATTTATTT
>BBUSE2823-12|Araneae|COI-5P
AACTTTATACTTGATTTTTGGTGCTTGGGCTGCTATAGTAGGAACAGCTATAAGAGTATTAATTCGAATTGAACTGGGAC
AACCAGGAAGATTTATAGGGGATGATCAATTGTATAATGTGATTGTGACTGCGCATGCATTTGTAATAATTTTTTTTATA
GTAATGCCAATTTTAATTGGTGGCTTCGGAAATTGATTAGTACCATTGATATTGGGGGCTCCAGATATGGCTTTTCCTCG
AATAAATAATTTGAGGTTCTGATTACTTCCCCCTTCTTTGTTTCTTTTAATTGTCTCATCAATAGTAGAGATAGGTGTAG
GGGCTGGATGAACAGTTTATCCACCCTTAGCGAGGTTAGAGGGTCATGCTGGAAGTTCAGTTGATTTTGCCATTTTTTCT
TTACATTTAGCAGGGGCATCTTCAATTATAGGTGCTATTAATTTTATTTCTACAATTATTAATATGCGTTTTTATGGGAT
AACTATGGAAAAGGTTCCTTTGTTTGTTTGGTCTGTTTTAATTACGGCTGTTTTATTATTATTGTCCTTACCTGTTTTAG
CGGGGGCTATTACTATATTATTAACAGATCGAAATTTTAATACTTCTTTTTTTGATCCTTCAGGGGGTGGAGATCCTATT
TTGTTTCAACATTTGTTT
>MYMCA1336-11|Diapterobatesnotatus|COI-5P|JX836437
TACTTTATATTTTATTTTTGGAGCTTGAGCTGGCTTGCTAGGGTCGGCTCTTAGGGGTTTAATTCGGTTAGAACTAGGCC
AACCCGGGTCTCTTTTAGAGAATGATCAAATCTATAACACTATCGTGACAGCTCACGCATTTGTAATAATTTTTTTTATA
GTTATACCTGTAATAATTGGAGGGTTTGGAAACTGACTAGTTCCGATAATGATTGGCGCTCAAGACATAGCGTTTCCTCG
AATGAACAACATAAGTTTTTGGCTTTTGCCACCCTCATTAGCATTACTATCTTCTTCAGCATTTGCTGGGATAGGGGCCG
GTACTGGTTGGACCGTGTACCCCCCCTTAGCAGGAAACCTGTTTCACTCTGGTTTTGCTGTAGACTTAGCTATTTTTAGT
TTACATCTAGCAGGGGCATCCTCAATTCTGGGAGCTATCAATTTCATTACAACAATTCTAAACATGCGATCCTCTTCTAT
AACACTGGATTCTATTCCGTTGTTTGTTTGGTCGGTTTTAATCACAGCAGTTCTTTTACTCTTGTCACTCCCAGTTTTAG
CAGGGGCTATCACTATACTGTTAACAGATCGAAATTTCAACACCTCTTTTTTTGATCCTTCAGGAGGGGGAGATCCCATC
TTATACCAACATCTTTTC
>SSBAD6326-13|Sarcoptiformes|COI-5P
AACTTTGTACTTTGTTTTTGGGGCATGGGCCGGCCTCATGGGGTCTGCTTTAAGAGGGCTCATTCGACTGGAATTAGGAC
AACCCGGTTCTTTGTTAGAAAATGATCAAATTTATAACACTATCGTTACAGCTCACGCTTTTGTAATAATTTTTTTTATA
GTCATGCCTTCCATGATTGGGGGTTTTGGGAACTGGCTAGTACCTATTATAATTGGTGCTCAAGACATGGCTTTCCCTCG
AATAAACAACATAAGATTTTGATTGCTACCTCCCTCTTTAACTCTCCTTTCTCTTTCTGCTTTTGCTTCTGCTGGGGTTG
GAACCGGATGAACTGTTTACCCTCCTCTGGCAGGAAACTTGTTTCATTCTGGAATTTCTGTTGATTTAGCGATTTTTAGA
CTGCATTTAGCAGGAGCTTCTTCCATTTTAGGAGCTATTAATTTTATTACCACAATTTTAAATATACGAACTTCTTCAAT
AACTCTAGATACCATGCCCCTGTTTGCCTGATCTGTCTTAATCACAGCAGTTTTACTTCTTCTTTCCTTACCTGTACTGG
CTGGTGCTATTACAATACTATTAACAGATCGAAATTTTAACACATCTTTTTTTGATCCATCT
>GBCH5830-13|Nephilainaurata|COI-5P|JF835984
AACATTATATTTAATTTTTGGAGCTTGAGCAGCAATATTAGGAACTGCAATAAGAGTGTTAATTCGAATTGAGCTTGGAC
AACCAGGAAGGTTTGTAGGTGATGATCAATTATATAATGTAATTGTTACGGCTCATGCTTTTGTAATAATTTTTTTTATA
GTAATACCAATTTTAATTGGAGGATTTGGAAATTGGTTAGTTCCTTTAATATTAGGGGCTCCAGATATAGCATTTCCTCG
AATGAATAATTTAAGGTTTTGATTATTACCTCCTTCATTATTTTTATTATTAATTTCTTCAATAGTAGAAATAGGTGTAG
GTGCTGGATGAACTGTTTATCCGCCTTTAGCATCTTTAGATGGACATGCTGGAAGATCTGTAGATTTTGCTATTTTTTCT
TTACATTTAGCAGGTGCATCTTCAATTATAGGAGCTATTAATTTTATTTCTACTATTATGAATATACGATCGTATGGAAT
ATCTATAGAAAAAGTTCCTTTATTTGTCTGATCGGTATTGATTACCGCTGTTTTATTATTATTATCTTTACCTGTATTAG
CAGGTGCAATTACTATATTATTAACTGATCGTAATTTTAATACTTCGTTTTTTGATCCTTCAGGTGGAGGTGATCCAATT
TTATTTCAACAT
>CNGMF1441-14|Arachnida|COI-5P
AACTTTGTACTTTATTTTCGGTGCTTGAGCTGGTCTTTTAGGTTCTGCTCTCAGAGGCTTAATTCGGTTAGAATTAGGCC
AACCAGGCTCCCTTATAGAAAACGATCAAATTTATAACACTATTGTTACCGCTCATGCTTTTGTTATAATTTTCTTTATA
GTTATGCCGGTAATAATTGGAGGATTCGGAAACTGATTAGTCCCTATAATGATTGGAGCACAAGACATAGCGTTCCCACG
AATAAATAATATAAGATTTTGGCTACTCCCCCCTTCTTTGGCACTCTTATCTTCTTCAGCATTTGCTGGAATAGGAGCTG
GTACAGGATGGACAGTCTACCCTCCTTTAGCAGGAAACCTTTTCCATTCTGGATTTTCTGTAGACTTAGCAATTTTTAGT
CTTCATCTGGCTGGCGCTTCTTCTATTTTAGGAGCAATCAATTTTATCACAACAATTCTTAATATGCGATCCTCCTCTGT
AACCTTGGATTCGATTCCTTTGTTCGTCTGATCCGTTTTAATCACAGCTGTGCTGTTACTTTTATCTTTACCTGTCCTTG
CTGGAGCAATTACTATACTTTTAACAGACCGAAACTTTAACACTTCATTTTTTGATCCATCCGGAGGAGGG
>MYMCC842-11|Eueremaeusmarshalli|COI-5P|JX836082
AACTTTATATTTCATTTTCGGTGCTTGAGCCGGTCTTTTAGGATCAGCTTTGAGGGCGTTAATCCGGTTAGAGTTAGGGC
AACCTGGTTCTTTGATAGAAAATGATCAAATTTATAATACTATTGTTACAGCCCATGCCTTTGTAATAATTTTCTTTATG
GTTATACCAGTAATAATTGGAGGATTCGGTAACTGACTTGTACCAATAATAATTGGAGCTCAAGATATAGCTTTTCCTCG
TATAAATAACATAAGATTCTGGTTACTACCACCTTCTTTATCCTTGCTATCTGCTTCAGCTTTTGCTGGGATAGGAGCCG
GGACTGGATGAACTGTTTACCCTCCCTTAGCTGGAAACTTATTCCATTCAGGATTCTCAGTTGACCTAGCCATTTTTAGT
CTTCATCTAGCTGGTGCCTCTTCTATTTTAGGAGCAATTAACTTTATCACTACCATTATAAATATACGTTCTTCCTCTAT
AACGTTAGACTCGATTCCTTTATTTGTTTGATCTGTGTTAATTACGGCTGTTCTTCTTTTGTTATCTTTACCCGTCTTAG
CTGGAGCTATCACTATACTACTAACAGACCGAAATTTTAATACTTCATTCTTTGACCCCGCAGGAGGAGGGGACCCAATT
TTGTATCAACATTTATTT
>ARONW038-11|Araneae|COI-5P
AACTTTATATTTAATTTTTGGTGCTTGATCTGCTATGGTAGGAACGGCTATAAGAGTAATAATTCGTATGGAGCTTGGAC
AATCTGGTAGACTTTTAGGAGATGATCATCTTTATAATGTAATTGTTACTGCTCATGCATTTGTAATAATTTTTTTTATA
GTTATACCTATTATAATTGGTGGATTTGGAAATTGATTAATTCCTTTAATATTAGGAGCACCTGATATGGCTTTTCCTCG
AATAAATAATCTTAGTTTTTGATTATTACCTCCATCTTTATTATTATTATTTATTTCTTCTATATCTGAAATAGGAGTAG
GTGCTGGATGAACTGTATATCCTCCTTTGGCATCTAGTATTGGTCATGCAGGTAGAGCTGTGGATTTTGCTATTTTTTCT
TTACATTTAGCTGGTGCATCATCTATTATAGGAGCTGTAAATTTTATTTCTACTATTATTAATATACGTTCTTATGGGAT
AAGTATGGAAAAGGTTCCTTTATTTGTTTGATCTGTTTTAATTACTGCTATTTTATTATTATTATCTTTGCCTGTTTTAG
CTGGTGCTATTACTATATTATTGACAGATCGAAATTTTAATACTTCGTTTTTTGATCCTGCTGGAGGAGGAGATCCTATT
TTATTTCAACATTTATTT
>GBCH6908-13|Achipteriacoleoptrata|COI-5P|JF263600
CCTGGATCTCTTATAGAAAATGATCAAATTTATAATACTATTGTTACAGCGCATGCCTTCGTAATAATTTTTTTTATAGT
CATGCCTGTAATAATTGGTGGGTTTGGAAATTGATTAGTTCCAATAATAATTGGAGCTCAAGATATGGCATTTCCACGTA
TAAATAATATAAGATTTTGATTGCTACCCCCTTCATTAACATTACTTTCTTCTTCAGCTTTTGCTGGGATAGGAGCTGGA
ACAGGGTGAACAGTGTATCCTCCTTTAGCTAGAAATTTATTCCATTCAGGATTTTCAGTAGATTTGGCAATTTTTAGATT
ACATTTAGCTGGAGCTTCTTCCATCCTAGGGGCTATTAATTTTATTACGACTATTATAAATATGCGTTCTTCTTCTATGT
CTTTAGATTCTATCCCATTATTTGTTTGATCAGTTCTAATTACAGCAGTTCTTTTACTACTATCTCTTCCAGTGCTTGCC
GGAGCAATTACTATATTATTAACAGATCGTAA
>MYMCE583-12|Rhagidiidae|COI-5P|JX836190
AACACTTTATTTTGCATTTGGATTATGATCAGCTTTATTAGGAGCATCAATAAGAATTATAATTCGAATAGAACTAGGAC
AACCAGGATCAATAATACAAAACGATCAAATTTATAACACCATTGTAACAGCCCATGCTTTCGTAATAATTTTTTTCATA
GTTATACCAATCATAATTGGTGGATTCGGAAATTGACTAGTCCCAATAATGATTGGAGCCCCTGACATAGCATTCCCTCG
AATAAACAACATAAGATTTTGATTACTACCTCCATCTTTATCTTTATTACTAATATCCGCATTTACCAGAGCTGGTGTGG
GAACAGGATGAACTGTTTACCCACCTTTATCCAGAAACATCGCCCACCCAGGAGGAGCAGTAGACTTAGGAATCTTTTCC
CTTCATCTAGCAGGGGTATCATCAATTTTAGGAGCAATCAATTTCATAACTACAATTATTAATATACGATCTCCAGCCAT
AACATTTGAACGAATTCCCTTATTTGTCTGATCAGTTTTCATTACGGCACTATTACTACTCTTGTCCCTACCAGTCCTAG
CAGGAGCCATTACAATACTATTAACGGACCGAAATTTTAACACTTCTTTCTTTGACCCTGCAGGAGGGGGAGACCCAATT
TTATACCAACACTTATTC
>SSEIB4586-13|Sarcoptiformes|COI-5P
CACTTTATATTTTATTTTTGGAACTTGGGCTGGTCTGATAGGCTCCTCCCTTAGAGCTCTGATTCGACTGGAACTGGGAC
AACCCGGGTCTTTACTAGAAAACGATCAAATTTACAATACCATTGTGACAGCCCATGCTTTCGTTATGATTTTTTTCATG
GTAATACCGGTAATAATTGGAGGGTTCGGAAATTGGCTGGTCCCAATGATGATTGGTGCTCAAGATATGGCCTTCCCTCG
AATGAATAACATAAGATTCTGGCTTCTTCCTCCTTCCTTAATACTGTTATCTGCTTCCGCTTTTGCAGGAATGGGTGTAG
GAACGGGGTGAACCGTGTATCCCCCTCTAGCAGGAAATTTATTTCATTCTGGAATTTCGGTGGACTTAGCTATTTTTAGA
CTACATTTGGCAGGTGCTTCTTCTATCCTAGGAGCTATCAATTTTATTACTACGATTATGAACATACGTTCTTCTTCCCT
AAGACTGGACTCAATCCCTTTATTCGTGTGATCTGTCTTAATTACTGCCGTTCTTCTCTTGTTAGCTCTCCCAGTACTAG
CTGGAGCTATCACTATATTACTAACTGACCGAAATTTTAACACATCGTTTTTTGACCCAACAGGAGGAGGAG
>CHACB1024-10|Lugoribatesgracilis|COI-5P|HM907157
AACTTTGTATTTCATTTTCGGAGCCTGAGCCGGTCTGCTAGGATCGGCTCTCAGAGGACTAATCCGGTTGGAACTAGGAC
AACCAGGCTCACTATTGGAAAATGATCAAATCTATAATTCTATTGTCACGGCTCACGCCTTTGTGATAATTTTTTTTATA
GTGATACCCGTGATGATTGGAGGGTTCGGAAACTGACTAGTCCCCATAATAATTGGGGCCCAAGACATGGCTTTTCCGCG
GATAAACAACATAAGCTTCTGATTGCTTCCACCGTCTTTGATATTGCTTTCCTCTTCAGCTTTTGCTGGGATAGGGGCTG
GAACTGGATGAACTGTCTACCCTCCCCTGTCTGGGAGTATCTTTCACTCCGGTTTTTCCGTAGATTTGGCCATTTTTAGA
CTTCATCTAGCCGGAGCTTCTTCTATCTTAGGGGCTATTAATTTTATCACAACAATTCTAAACATACGATCTTCTTCAAT
AACGTTAGACTCCATCCCCCTTTTTGTATGATCAGTGCTAATCACAGCTGTGCTACTTCTTCTTTCTCTTCCAGTACTAG
CAGGAGCCATCACCATGCTTCTGACAGACCGAAACTTTAATACTTCATTTTTTGATCCCTCTGGAGGGGGAGACCCCATC
CTTTATCAACATCTTTTT
>SSWLC3122-13|Sarcoptiformes|COI-5P
AACTCTCTATTTTATTTTTGGAGCTTGAGCAGGCCTTTTGGGATCTGCTTTAAGAGGTTTAATTCGATTAGAGCTAGGAC
AGCCAGGCTCTCTTCTAGAAAATGATCAAATTTATAATACAATTGTGACGGCACATGCTTTTGTAATGATTTTTTTTATA
GTTATGCCTATTATAATTGGAGGGTTTGGTAATTGATTGGTTCCTATAATAATTGGAGCACAAGACATGGCATTTCCACG
GATAAACAATATAAGATTTTGGCTTCTTCCTCCTTCTTTAGCTTTATTATCTTCATCTGCATTTGCTGGAATAGGAGCTG
GAACAGGATGAACCGTTTATCCCCCTTTAGCTGGAAACTTATTTCATTCAGGATTTTCTGTAGATTTAGCGATTTTTAGT
CTTCATTTAGCAGGGGCTTCTTCAATTTTAGGAGCTATCAATTTTATTACAACAATTTTAAATATGCGCTCTTCTTCAAT
GACTTTGGATTCCATCCCTTTATTTGTTTGATCAGTATTGATTACAGCAGTTTTACTTTTACTATCTTTACCAGTGTTAG
CAGGAGCTATCACAATACTTCTTACAGACCGTAATTTTAATACTTCTTTTTTTG
>ARONT363-09|Wadotescalcaratus|COI-5P|GU682892
TACTTTGTACTTAGTTTTTGGGGCTTGATCTGCTATAGTTGGTACTGCTATAAGAGTTTTGATTCGAATTGAATTAGGTC
AGTCAGGTAGATTTTTAGGGGATGATCATCTATTTAATGTAATTGTTACTGCACATGCTTTTGTAATAATTTTTTTTATA
GTGATACCAATTTTAATTGGTGGATTTGGTAATTGATTAATTCCTTTAATGTTAGGAGCTCCAGATATAGCTTTTCCTCG
TATAAATAATTTAAGTTTTTGATTGCTTCCTCCTTCATTATTTTTATTAGTAATTTCTTCTATAGTGGAAATAGGAGTGG
GAGCTGGTTGAACTGTATATCCTCCTTTGGCTTCTAGTTTAGGACATACTGGAAGCTCAGTGGATTTTGCTATTTTCTCT
TTACATTTAGCTGGAGCTTCTTCTATTTTAGGTGCTATTAATTTTATTTCTACTATTATTAATATACGTTCTTATGGAAT
GACTTTTGAGAAGGTTCCTTTATTTGTTTGATCTGTATTAATTACTGTTATTTTATTATTATTATCTCTTCCTGTTTTAG
CAGGAGCTATTACAATATTATTAACTGATCGGAATTTTAATACTTCATTTTTTGATCCAGCTGGGGGAGGAGATCCTATT
TTATTTCAACATTTATTT
>CHACB349-10|Neonothrushumicola|COI-5P|HQ558530
AACTCTCTACTTCATTTTTGGCACTTGGGCGGGGCTGATAGGGTCTTCTCTAAGAGCACTAATTCGTTTGGAACTCGGGC
AGCCAGGATCCTTATTAGACAATGATCAAATTTACAATACAATCGTTACAGCACATGCTTTCGTTATAATCTTTTTTATA
GTCATACCGGTTATAATTGGGGGATTTGGTAATTGGCTGGTTCCATTGATAATTGGTGCACAAGATATAGCTTTCCCTCG
TATAAACAACATAAGATTTTGGTTACTTCCCCCATCTTTATGTTTACTTTCTGCTTCAGCGTTCGCGGGTCTGGGAGTGG
GAACGGGTTGAACCGTGTACCCCCCATTAGCGGGAAACCTTTTTCACTCTGGATTTTCCGTTGACCTTGCAATTTTCAGT
TTACATTTGGCAGGAGCTTCTTCAATCTTAGGTGCCATCAATTTCATTACTACAATTTTAAACATACGGTCTTCTACCAT
AAGTCTCGATTCTATCCCATTATTCGTTTGGTCGGTTTTAATCACTGCTGTGCTTTTACTACTAGCCCTTCCCGTATTGG
CAGGCGCCATCACTATACTTCTCACAGATCGTAACTTCAATACTACGTTCTTTGACCCTGCGGGTGGGGGAGATCCTATC
CTTTACCAACATTTATTC
>HSYE167-11|Mesostigmata|COI-5P
AACTATTTATTTAATTTTTAGAATATGATCTGCGGCAGTAGGTACTGCTTTAAGATCAATTATTCGAGTAGAATTAGGTC
AACCTGGATCTTTTATTAATGATGATCAAATTTATAATACAATTGTAACTTCTCATGCATTTATTATAATTTTTTTTATA
GTTATACCTGCTATAATTGGAGGATTTGGTAATTGATTAGTTCCTTTAATAATTTCTGCTCCTGATATAGCTTTTCCTCG
TTTAAATAATATAAGATTTTGATTATTAGTTCCTTCAATATTTTTATTATTAATTTCATCTTTTGTAGAAAGAGGAGCAG
GAACAGGTTGAACTGTTTATCCTCCTTTAGCTAGATTATTATCTCATAGTGGAGCATCTGTAGATTTAGCTATTTTTAGT
CTTCATTTAGCTGGAATTTCTTCAATTTTAAGATCAATAAATTTTATTTCAACAATTTTAAATATACGTCCTTTATCTAT
AAAAATAGAAGTTGTTCCATTATTTGTTTGGTCTGTTTTTATTACTACAATTCTTTTATTATTATCTTTACCAGTTTTGG
CTGGAGCAATTACTATACTTTTAACTGATCGAAATTTTAATACTTCTTTTTTTGATCCTAGAGGGGGAGGTGATCCTATT
CTTTATCAACATTTATTT
>SPICH212-09|Gnaphosamicrops|COI-5P|GU683956
AACTTTATATTTATTATTTGGATCTTGAGCTGCTATAGTAGGAACTGCTATAAGAGTATTAATTCGTATGGAATTAGGAC
AAACAGGGAGTTTATTAGGAGATGATCATCTTTATAATGTAATTGTAACAGCTCATGCATTTGTAATAATTTTTTTTATA
GTAATACCAATTTTGATTGGAGGATTTGGAAATTGATTGGTTCCTTTAATATTAGGAGCTCCTGATATAGCTTTTCCTCG
AATGAATAATTTAAGATTTTGATTATTGCCCCCTTCTTTAATTTTATTATTTATTTCATCTATAGTTGAAATAGGGGTAG
GAGCGGGGTGAACTGTTTATCCTCCTTTAGCTTCAGGTTTAGGACATCCTGGAAGAGCAATAGATTTTGCTATTTTTTCT
TTACATTTAGCGGGTGCTTCTTCTATTATAGGAGCTGTAAATTTTATTTCTACTATTATTAATATACGTTCATTTGGAAT
AAGAATAGAAAAGGTTTCTTTATTTGTATGATCAGTATTAATTACTGCTGTTTTATTATTATTGTCTTTACCTGTTTTAG
CGGGTGCTATTACTATATTATTGACTGATCGAAATTTTAATACTTCTTTTTTTGACCCAGCTGGAGGAGGGGATCCAATT
TTGTTTCAACATTTATTT
>ETKII1463-13|Ixodida|COI-5P
AACTATATATTTAATTTTTGGAAGATGATCTACAATAGTGGGTATATCAATAAGAATTTTAATTCGATCTGAACTAGGCC
AACCAGGATCTTTAATTGGAAATGACCAAATTTATAATGTTCTAGTAACAGCTCATGCTTTTATTATAATTTTCTTTATA
GTTATACCAGTAATAATTGGTGGATTTGGAAATTGATTAGTACCTCTTATATTAGGTGCTCCAGATATAGCATTTCCCCG
AATAAATAATTTGAGGTTTTGACTTCTACCCCCTTCTCTTTTTCTTTTACTAAATTCCTCTTTAGTTGAAAGAGGAGTTG
GAACAGGTTGAACCGTATACCCCCCTTTATCAAGTAATATTTCACATTCAGGGGCTTCTGTAGATATAGCAATTTTTTCT
CTTCATTTAGCTGGTATTTCTTCTATTTTGGGTGCAATTAATTTCATTACTACTATTATTAATATACGTTCACCTAGTAT
AACGCTAGAACGAATACCTCTTTTTGTTTGATCTGTATTAATTACAGCTATTTTACTTCTTTTATCTTTACCAGTACTAG
CGGGGGCTATTACAATATTATTAACAGACCGAAATTTCAATACTTCTTTTTTTGACCCAGCAGGGGGTGGTGATCCTGTT
TTATATCAACATTTATTT
>SPIRU1923-12|Araneae|COI-5P
GAGTTTATATTTTATTTTCGGGGCTTGAGCTGCAATAGTCGGGACAGCAATAAGAGTATTGATTCGAATTGAGTTAGGAC
AAACTGGTAGTTTATTAGGAGATGATCAGCTTTATAATGTTATTGTTACTGCTCATGCTTTTGTTATAATTTTTTTTATA
GTAATACCTATTTTAATTGGGGGGTTTGGAAATTGATTGGTTCCGTTGATATTAGGTGCACCTGATATAGCATTCCCTCG
TATAAATAATTTAAGTTTTTGATTGTTACCTCCTTCTCTGCTATTATTATTTGTTTCAAGTATAGACGAAATGGGGGTTG
GGGCAGGATGAACTGTGTATCCTCCTCTCGCTTCTTTGGAGGGGCATTCTGGTAGTTCAGTAGATTTTGCTATTTTTTCT
TTACACTTAGCTGGTGCGTCATCTATTATGGGTGCTATTAATTTTATTTCTACTATCTTAAATATACGAGGATATGGTAT
AAGTATAGAAAAGGTTCCTTTGTTTGTTTGGTCTGTTTTAATTACAGCTGTTTTGTTATTATTATCTTTACCTGTTTTAG
CAGGGGCTATTACTATGCTTTTAACGGATCGAAACTTTAATACATCATTTTTTGATCCATCTGGTGGAGGGGACCCGGTT
TTATTTCAACATTTGTTT
>CNPAC362-13|Mesostigmata|COI-5P
AATTATTTATTTAATTTTCTCAATATGATCTGCAATGTTAGGTTCTTCAATAAGTTTAATTATTCGAATTGAATTAAGAC
AACCTGGAACTTCTTTTTTAATACATGATCAACTTTTTAATACAATTGTTACTGCTCATGCTTTTATTATAATTTTTTTT
ATAGTTATACCTGCAATAATTGGAGGTTTTGGTAACTGATTAACTCCTCTTTTACTTAATTGTCCTGATATAATTTTTCC
TCGAATAAATAATATAAGATTTTGATTATTACCTCCTAGATTAATTTTATTAATTTTAAGATCAATAATAGATATTGGAG
TCGGAACAGGTTGAACAGTTTATCCTCCTTTATCTAGAAATATTAATCATAGAAGTTCAGCAGTAGATTTAGCTATTTTT
AGCTTGCATATTGCAGGTATTTCTAGAATTTTAGGTTCTATTAATTTTATTACTACTATTTTAAATATACGAAGAAAAAA
TATAACATATGAACGTATTCCATTATTTATTTGATCTGTTTTTATTACCACTATTCTTCTTTTATTAAGATTACCAGTTT
TAGCTGGTGCGATTACAATACTTTTATTTGATCGAAATTTTAATACTTCTTTTTTTGATCCTAGTGGAGGAGGAG
>MYMCE402-12|Eupelops|COI-5P|JX838022
AACTTTGTACTTTATTTTTGGAGCTTGAGCTGGCCTTCTTGGCTCTGCTTTAAGAGGGCTAATTCGATTAGAACTAGGAC
AACCTGGTTCTCTAATAGAAAATGACCAAATTTATAACACCATCGTGACAGCGCATGCTTTTGTCATGATTTTTTTCATA
GTCATGCCAGTGATAATTGGAGGTTTTGGAAACTGACTTGTTCCTATAATAATTGGAGCTCAAGATATAGCCTTCCCACG
AATAAATAACATGAGGTTTTGACTTTTGCCTCCTTCTCTAGCCCTTCTCTCTTCTTCTGCCTTTGCTGGCATGGGAGCTG
GTACCGGTTGAACGGTCTATCCTCCCTTATCAGGAAACTTGTTTCATTCGGGTTTCTCAGTAGATTTAGCTATTTTTAGA
CTACATTTAGCGGGGGCTTCTTCTATTTTAGGAGCCATCAACTTTATCACAACCATTTTAAACATACGATCTTCTTCTAT
AACATTAGATTCAATCCCACTGTTTGTATGATCAGTCTTAATTACAGCAGTCCTATTATTACTTTCCTTACCAGTACTTG
CTGGGGCAATTACTATACTTCTTACAGATCGTAATTTCAATACATCTTTTTTCGACCCATCCGGAGGGGGGGACCCTATT
TTATATCAACATCTATTC
>TDWGB950-10|Hentziamitrata|COI-5P|HQ979370
AACATTATATCTAATTTTTGGAGCTTGATCTGCTATAGTAGGTACAGCAATAAGAGTATTAATTCGAATGGAATTAGGTC
AGACTGGGTCATTTTTAGGTAATGACCACATATATAATGTTATTGTTACAGCTCATGCTTTTGTCATAATTTTTTTTATA
GTAATGCCTATTTTAATTGGAGGTTTTGGAAATTGGTTGGTTCCTTTAATATTAGGGGCTCCCGATATAGCTTTTCCTCG
GATAAATAATTTAAGTTTTTGATTATTACCTCCTTCATTATTATTATTATTTATTTCTTCATTAGCAGAAATAGGAGTTG
GGGCTGGATGAACTGTTTATCCTCCTTTAGCTTCTATTGTTGGTCATAATGGAAGATCTGTGGATTTTGCTATTTTTTCT
TTACATTTAGCAGGTGCTTCTTCAATTATGGGGGCTATTAATTTTATTTCAACTATTATTAATATACGTTCTATTGGAAT
GTCTTTAGATAAGATTCCTCTTTTTGTTTGATCAGTTATAATTACGGCTGTATTATTACTTTTATCGTTACCAGTATTAG
CTGGAGCTATTACTATATTATTAACTGATCGAAATTTTAATACTTCTTTTTTTGACCCAGCAGGAGGAGGGGATCCTATT
TTATTTCAACATTTATTT
>SPRMA1225-12|Araneae|COI-5P
GAGTCTATATTTTATTTTTGGGGCTTGAGCAGCCATAGTAGGAACGGCAATAAGAGTATTAATTCGAATTGAGTTAGGTC
AAACTGGGAGATTATTAGGGGATGATCAATTATATAATGTTATTGTAACGGCTCATGCTTTTGTAATAATTTTTTTTATA
GTGATGCCTATTTTAATTGGAGGGTTTGGTAATTGATTGGTTCCTTTAATGTTAGGGGCGCCTGATATAGCATTTCCTCG
AATAAATAATTTAAGATTTTGATTATTACCTCCGTCTTTATTTTTATTATTTATTTCTAGAATGGATGAAATAGGAGTAG
GAGCAGGATGAACTGTGTATCCACCTCTTGCTTCTTTGGAAGGGCATGCTGGAAGTTCTGTAGATTTTGCTATTTTTTCC
TTACATTTAGCTGGGGCTTCTTCAATTATGGGGGCTATTAATTTTATTTCTACAATTTTAAATATGCGGGGGTATGGAAT
AACTATAGAGAAGGTTCCCTTATTTGTATGGTCTGTCTTGATTACGGCTGTTTTATTATTATTGTCTTTACCTGTTTTGG
CGGGGGCTATTACTATATTATTAACTGATCGAAATTTTAATACATCATTTTTTGATCCTTCTGGGGGAGGGGACCCTGTG
TTATTTCAACATTTATTT
>GBCH6519-13|Platynothruspeltifer|COI-5P|JF263989
CCGGTTCACTTCTAGATAACGACCAAATCTACAACACTATTGTCACAGCTCACGCCTTCGTAATGATTTTTTTCATAGTA
ATACCAGTAATAATTGGGGGGTTTGGAAACTGGCTAGTACCGCTGATAATTGGGGCACAAGATATGGCCTTCCCCCGCAT
AAATAATATAAGATTCTGACTCCTTCCTCCTTCTCTATGTCTTCTTTCCGCATCTGCTTTCGCCGGATTAGGTGTAGGGA
CCGGGTGAACCGTGTACCCCCCACTAGCTGGAAATCTTTTCCACTCAGGATTTTCAGTAGACCTTGCAATTTTCAGGCTC
CATCTTGCAGGAGCTTCTTCTATCTTGGGGGCCATTAATTTCATCACTACAATTCTAAACATACGATCTTCCACAATAAG
CCTAGACTCCATCCCATTATTCGTATGATCCGTTTTAATCACTGCCGTCTTATTACTACTGGCGCTACCCGTGTTAGCAG
GAGCTATTACCATACTTTTGACAGACCGTAATTTCAACACAACGTTTTTTGATCCGGCGGGAGGAGGAGACCCAATCT
>SPIRU334-11|Araneae|COI-5P|JF886601
AACGTTATATTTAATTTTTGGTGTATGGTCAGCTATAGTTGGTACAGCGATGAGTGTCCTAATTCGGGTAGAATTAGGAC
AATCTGGAAGATTGTTTGGAGATGACCAGTTATACAATGTTATTGTAACTGCTCATGCTTTTGTTATAATCTTTTTCATA
GTAATACCTATTATAATTGGAGGTTTTGGAAATTGGTTAGTGCCTTTAATATTAGGGGCTCCTGATATAGCTTTTCCTCG
TATGAACAATCTTAGATTTTGATTATTACCTCCTTCCTTATTTTTATTGTTTATTTCTTCTATAGTAGAAATAGGGGTTG
GAGCTGGATGAACAATTTATCCACCTTTATCTTCTTTGGAAGGTCATTCTGGAAGATCGGTTGATTTTGCTATTTTTTCT
TTACATCTTGCAGGTGCTTCTTCTATTATAGGAGCTGTAAATTTTATTTCTACTATTTTAAATATACGCGTATATGGAAT
ATCTATAGATAAGGTTACTTTATTTGTGTGATCAGTTTTAATTACTGCAATTTTATTATTGTTATCACTTCCTGTTTTAG
CTGGAGCTATTACTATATTATTAACTGATCGAAATTTTAATACTTCTTTTTTTGATCCTGCTGGAGGGGGTGATCCTATT
TTATTTCAACATTTATTT
>ETKS820-13|Araneae|COI-5P
AACTTTATATTTGATTTTTGGAGCTTGAGCTGCTATAGTAGGAACAGCTATGAGAGTTTTAATTCGAATGGAATTAGGAC
AAACTGGAAGATTTTTGGGTAATGAACATTTATATAATGTAATTGTTACAGCGCATGCATTTGTTATAATTTTCTTTATA
GTTATACCAATTTTAATTGGTGGATTTGGTAATTGATTAGTTCCTTTGATATTAGGAGCTCCAGATATAGCTTTTCCTCG
TATAAATAATTTGAGATTTTGATTATTACCCCCTTCATTAATATTATTATTTATTTCTTCTATAGCTGAAATAGGAGTAG
GAGCGGGTTGAACTGTTTATCCTCCTTTAGCTTCTATTGTAGGACATAATGGAAGATCAGTGGATTTTGCTATTTTTTCT
TTACATTTGGCTGGGGCATCATCTATTATAGGAGCTATTAATTTTATTTCAACAGTAGTCAATATACGTTCGGTTGGTAT
ATCTATAGATAAGATTCCTTTATTTGTGTGATCAGTAGTAATTACTGCTGTTTTATTATTATTATCTTTACCTGTGTTAG
CAGGTGCTATTACTATATTGTTGACTGATCGTAATTTTAATACTTCATTTTTTGATCCGGCTGGAGGAGGGGATCCAATT
TTATTTCAACATTTATTT
>MYMCE147-12|Erythraeidae|COI-5P|JX835627
ATCATTATATTTTATACTAGGAACCTGATCAGGAGTAATAGGATTAAGAATAAGAATAATTATTCGATTAGAGCTAGGGC
AACCAGGGCAAACAATTGGAAACGAGCAACTATACAATTCTATAATTACATCTCATGCATTTATCATAATTTTCTTTATA
GTCATACCCATTATAATTGGAGGATTTGGAAACTGATTAGTGCCCCTAATGTTAGGTGCTCCCGACATGGCTTTTCCACG
TATAAATAATATAAGATTCTGACTTCTTCCCCCCTCTCTTATACTTCTTATAACAGCTTCATTCGCCTCCATAGGAGTGG
GGACTGGATGAACAGTATACCCTCCCCTTTCAGACTTATGAGGTCATAACTCTTACTCAATTGAAATAACAATTTTCTCA
CTTCATCTAGCAGGAGTTTCGTCTATTTTAGGAGCCATTAATTTCTTAGCGACAATTAAAAATATAAAAAATAAATTTCT
ATCAATAGAAAAAATCCCTTTATTTGTTTGATCTGTAATAGCTACGGCCATCTTACTATTACTATCATTACCAGTACTAG
CAGGTGCTATTACAATACTACTCTCAGATCGAAATTTCAACACATCATTTTTTGACCCCTCTGGAGGAGGAGACCCAATC
CTTTACCAACACTTGTTC
>SPIEU865-10|Araneae|COI-5P|HQ975415
TACTTTATATTTGATTTTTGGAGCTTGAGCTGCTATAGTTGGAACAGCTATAAGAGTATTAATTCGAATTGAATTAGGTC
AACCTGGAAGATTTATGGGTGATGATCAACTTTATAATGTAATTGTAACTGCACATGCGTTTGTTATAATTTTTTTTATG
GTAATGCCTATTTTAATTGGAGGTTTTGGGAATTGATTGGTTCCTTTAATATTAGGAGCTCCCGATATAGCATTTCCACG
AATGAATAATTTAAGATTTTGATTACTTCCTCCTTCTTTGTTTCTCCTTATCGTATCTTCTATAGTTGAAATGGGTGTAG
GGGCAGGTTGAACTGTGTATCCTCCTTTAGCTGGTCTTGAAGGACATTCTGGAAGGTCTGTAGATTTTGCAATTTTTTCT
TTACATTTAGCTGGGGCATCATCTATTATAGGTGCTATTAATTTTATTTCAACAATTATTAATATACGATTTTATGGTAT
AACTATAGAAAAAGTTCCATTATTTGTTTGATCTGTACTAATTACTGCTGTATTATTATTGCTTTCTCTACCTGTATTAG
CTGGTGCTATTACTATATTATTAACTGATCGAAATTTTAATACTTCATTTTTTGACCCTTCTGGAGGTGGGGATCCTATT
TTATTTCAACATTTATTT
>SPIEU741-10|Araneae|COI-5P|HQ975322
GACTTTGTATTTAATATTTGGTATTTGATCGGCTATGGTAGGTACGGCTATAAGAGTATTGATTCGAATGGAGTTAGGTC
ATTCTGGAAGTTTATTGGGAGATGATCATTTGTATAATGTTGTAGTTACTGCTCATGCATTTGTTATGATTTTTTTTATA
GTTATACCTATTTTGATTGGAGGTTTTGGAAATTGGTTGGTTCCTTTAATATTAGGGGCTCCTGATATATCATTTCCTCG
TATAAATAATCTTTCTTTTTGATTATTACCTCCTTCTTTGTTTTTATTATTAATGTCTTCTTTGGTTGAGATAGGGGTTG
GGGCAGGTTGAACTGTTTATCCTCCTTTGGCTTCTAGAGTTGGGCATATAGGAAGATCTATGGATTTTGCTATTTTTTCT
CTTCATTTGGCTGGTGCTTCTTCTATTATGGGAGCTGTAAATTTTATTTCTACAATTATTAATATACGGGTAGTTGGAAT
ATCTATAGATAAGGTTCCTTTGTTTGTTTGATCTGTTTTTGTTACTGCTGTTTTATTGCTTTTGTCTCTACCTGTTTTAG
CGGGTGCTATTACTATGTTATTGACTGATCGAAATTTTAATACTTCTTTTTTTGATCCTGCTGGGGGAGGGGATCCTATT
TTATTTCAACATTTATTT
>BBUSU200-11|Araneae|COI-5P|JN294795
GACTTTATATTTTATTTTTGGTGCTTGAGCTTCAATAGTAGGGACAGCTATAAGTGTGCTAATTCGGATTGAGTTAGGTC
AATCGGGAAGATTTTTAGGCGATGATCAATTGTATAATGTGATTGTAACAGCTCATGCTTTTATTATAATTTTTTTTATA
GTTATACCTATTTTAATTGGGGGATTTGGAAATTGATTGGTTCCTTTAATATTAGGGGCTCCTGATATGGCTTTTCCTCG
GATAAATAATTTAAGTTTCTGACTATTACCTCCTTCACTCTTTTTATTATTTATTTCTTCAATGGTAGATATAGGAGTGG
GGGCTGGGTGAACTGTATATCCTCCTTTAGCTTCTTTAGAAGGGCATTCTGGTAGTTCTATGGATTTTGCTATTTTTTCT
CTTCATTTAGCTGGGGCTTCTTCTATTATAGGGGCTATTAATTTTATTTCTACTATTTTTAATATACGGGTAAATGGAAT
AAGAATAGAAAAAGTTCCTTTATTTGTTTGATCTGTGTTAATTACAGCTGTTTTATTATTATTATCGCTCCCGGTTTTGG
CAGGGGCGATTACTATATTGTTAACAGATCGTAATTTTAATACTTCTTTTTTTGACCCTTCTGGAGGAGGGGATCCAGTT
CTTTTTCAACATTTATTT
>SPICA669-10|Araneae|COI-5P|JF885850
TTCTTTATATTTTATTTTTGGAGCTTGAGCTGCTATAGTAGGGACTGCTATAAGAGTATTGATTCGAATTGAGTTAGGTC
AAACAGGGAGAATATTGGGCGATGACCAGTTATATAATGTTATTGTTACAGCTCATGCTTTTGTTATAATTTTTTTTATA
GTTATACCAATTTTAATTGGTGGGTTTGGAAATTGGTTAGTACCTTTGATGTTAGGAGCCCCTGATATAGCTTTTCCACG
AATAAATAACTTGAGATTTTGGTTATTACCCCCTTCTTTATTATTATTGTTTATTTCGAGTATAGTTGAGATAGGAGTTG
GGGCTGGGTGAACTGTGTATCCCCCTCTTGCTTCTCTAGAGGGGCATGCTGGTAGTTCTGTTGATTTTGCTATTTTTTCT
CTTCATTTAGCTGGGGCTTCTTCTATTATGGGGGCTATTAATTTTATTTCTACTATTATTAATATACGAGGGTATGGAGT
TTCTATAGAAAAAGTTCCACTTTTTGTGTGATCTGTATTAATTACAGCTGTTTTGTTACTTTTATCTCTTCCTGTTTTAG
CAGGGGCAATTACAATATTATTAACAGATCGTAATTTTAATACCTCTTTTTTTGATCCGGCAGGGGGAGGGGACCCAGTT
TTATTTCAACATTTATTT
>ETKS383-13|Araneae|COI-5P
TACTTTATATTTAATTTTTGGGGCTTGATCTGCTATAGTAGGTACGGCTATAAGTGTTCTTATTCGAATTGAATTAGGGC
AATCAGGAAGATTTTTTGGAGATGATCATTTGTATAATGTTATTGTAACAGCTCATGCTTTAGTTATAATTTTTTTTATA
GTAATACCTATTTTAATTGGAGGTTTTGGAAATTGACTAGTTCCTCTAATATTAGGTGCTCCTGATATAGCTTTTCCTCG
AATAAATAATTTGAGTTTTTGACTTTTACCTCCTTCTCTTGTGTTATTGTTTATTTCTTCTATAGTGGAGATAGGAGTAG
GGGCTGGGTGAACTATTTATCCTCCTTTGTCTTCATTAATAGGACATTCTGGGAGATCAATAGATTTTGCTATTTTTTCT
TTACATTTAGCTGGTGCTTCTTCAATTATAGGGGCTATTAATTTTATTACTACTATTGTGAATATACGTTCTTCAGGAAT
AAGAATGGAAAAGGTTCCGTTATTTGTGTGGTCTGTTTTGGTTACGGCAGTATTATTATTATTATCTTTACCTGTTTTAG
CGGGAGCTATTACTATATTGTTAGTGGATCGAAATTTTAATACTTCTTTTTTTGATCCTGCTGGGGGTGGTGATCCAATT
TTATTTCAACATTTATTT
>RBINA4903-13|Misumessusoblongus|COI-5P
ACTTTATATCTATTATTTGGAGCATGATCTGCCATAGTTGGTACTGCAATAAGTGTATTAATTCGTATAGAGCTGGGGAA
TTCAGGAAGATTATTAGGAAATGATCATTTATATAATGTAATTGTAACTGCTCATGCTTTTGTTATAATTTTTTTTATAG
TAATACCAATTTTAATTGGTGGTTTTGGAAATTGATTGGTTCCTTTAATGTTAGGTGCTCCTGATATATCTTTTCCGCGA
ATAAATAATTTATCTTTTTGATTACTACCTCCTTCTTTATTTTTATTATTTATATCTTCTATAGTTGAAATAGGAGTAGG
AGCTGGGTGAACTGTTTATCCTCCTTTAGCATCAAGTGTAGGTCATATAGGGAGATCTATAGATTTTGCTATTTTCTCTC
TTCATTTAGCTGGTGCATCTTCTATTATAGGAGCTGTAAATTTTATTTCTACTATTATTAATATACGAAGTAATGGAATA
AGAATGGAAAAAGTTCCTTTATTTGTATGATCTGTTTTAATTACTGCTATTTTATTGCTTTTATCTTTACCGGTACTAGC
AGGAGCTATTACTATATTATTAACTGAT
>CNPPA4082-12|Laelapidae|COI-5P|KJ092971
TACTTTATATTTTATTTTTGCTTTTTGGTCAGGGATAGTAGGGACTTCCTTGAGTATATTAATTCGGATGGAATTAGCTC
AACCTGGGGTCTTAATTGGGGATGACCAAATTTATAATGTAGTTGTTACTGCTCATGCTTTTGTCATAATTTTTTTTATA
GTTATACCTTCTTTAATTGGAGGATTTGGGAATTGATTAGTTCCAATAATATTATCAGCTCCTGATATGGCTTTTCCTCG
GATAAATAATATGAGATTTTGATTATTACCCCCTTCTTTAATGTTTTTATTATTTTCTTCAATAGTGGAGTCTGGGGTAG
GAACAGGGTGAACTGTGTATCCCCCCTTATCTAGAGTTATATTTCATAGAGGGGCTTCTGTTGATTTGTCAATTTTTTCC
TTACATTTAGCAGGGGTCTCTTCAATTTTAGGTTCTATTAATTTTATTTGTACTATTTTAAATATGCGTCCAAATGGTTT
ATCTTTGGAACAAATACCTTTATTTGTGTGGTCAGTTTTTATCACCACTATTTTGTTATTATTAAGCCTTCCTGTTTTAG
CAGGAGCTATCACTATGTTATTGACGGATCGAAATTTTAATACTAGATTTTTTGACCCTAGAGGAGGAGGGGATCCTG
>BBUSE2460-12|Araneae|COI-5P
TACATTATACTTAATTTTTGGTGCATGGGCTGCTATAATAGGAACAGCTATGAGAGTATTAATTCGAATTGAGTTAGGTC
AACCTGGAAGATTTATGGGTGATGATCAATTATATAATGTAATTGTAACTGCTCATGCTTTTGTTATGATTTTTTTTATA
GTTATGCCTATTTTAATTGGGGGTTTCGGTAATTGATTGGTTCCATTAATATTAGGGGCTCCTGATATAGCTTTTCCTCG
AATAAATAATCTTAGATTTTGATTATTACCCCCTTCATTATTTTTATTAGTAATTTCATCAATGGTAGAAATAGGAGTTG
GGGCAGGATGAACAGTATACCCCCCGTTGGCGGGTTTGGAGGGTCATGCTGGTAGATCTGTTGATTTTGCTATTTTTTCT
TTGCATTTGGCTGGGGCTTCTTCAATTATGGGAGCTATTAATTTTATTTCTACTATTATTAATATACGATTTTATGGAAT
AACCATAGAAAAGGTTCCTCTATTTGTATGATCTGTATTAATTACAGCAGTATTATTATTATTGTCATTGCCAGTCTTAG
CTGGGGCTATTACTATATTGTTAACTGATCGAAATTTTAATACTTCTTTTTTTGATCCATCAGGGGGTGGGGATCCAATT
TTATTTCAACATTTATTC
>SPICA448-10|Araneae|COI-5P|JF885638
GACATTATATTTAGTTTTTGGGGCTTGAGCTGCAATAGTTGGGACGGCTATAAGAGTATTAATTCGAGTTGAGTTAGGAC
AGACAGGGAGAATATTAGGAGATGATCATTTATATAATGTTATTGTAACGGCTCATGCATTTGTTATAATTTTTTTTATG
GTTATACCTATTTTAATTGGGGGATTTGGAAATTGGTTAGTGCCTTTAATGTTAGGGGCTCCTGATATAGCATTTCCACG
TATAAATAATTTAAGTTTTTGACTTTTACCTCCTTCTTTATGTATATTATTTATATCTTCTATAGTAGAAATAGGTGTTG
GAGCAGGATGAACTATTTATCCTCCTTTGGCTTCTTTAGAAGGGCATGGGGGAAGTTCTGTAGATTTTGCTATTTTTTCT
TTACATTTAGCAGGAGCTTCTTCTATTATAGGGGCAATTAATTTTATTTCTACAATTTTAAATATACGAGTTAATGATAT
TAGTATAGAAAGGGTTTCTTTGTTTGTGTGATCTGTTTTAATTACTGCAGTATTATTGCTTTTGTCTTTACCTGTTTTAG
CAGGGGCTATTACTATATTATTAACTGATCGAAATTTTAATACTTCTTTTTTTGATCCAGCAGGAGGAGGAGATCCTGTT
TTATTTCAACATTTATTT
>SPITO033-10|Araneae|COI-5P|HQ977062
TACTTTATATTTAGTATTTGGAGCTTGGGCAGCAATGGTTGGGACAGCAATAAGAGTTTTAATTCGAACTGAGTTAGGTC
AGCCTGGAAGATTTATAGGAGATGATCAATTATATAATGTTATTGTAACTGCGCATGCTTTTGTAATGATTTTTTTTATA
GTTATACCTATTTTGATTGGTGGGTTTGGAAATTGGTTGGTTCCTTTAATGTTAGGAGCTCCTGATATAGCATTCCCTCG
TATAAATAATTTAAGATTTTGATTGTTACCTCCTTCTTTATTTTTATTGTTTATTTCTTCTATAGTTGAGATAGGAGTAG
GAGCGGGTTGAACAGTTTATCCTCCTTTGGCTTCTCTGGAAGGACATTCAGGTAGATCAGTTGATTTTGCTATTTTTTCT
TTGCATTTAGCAGGTGCTTCTTCTATTATAGGAGCTATTAATTTTATTTCTACTATTTTAAATATACGTTCTTATGGAAT
AACTATGGAAAAAGTTCCTTTATTTGTCTGATCAGTATTAATTACTGCAGTTTTATTATTATTATCTTTACCAGTTTTAG
CAGGGGCTATTACTATATTACTCACAGATCGTAATTTTAATACATCTTTTTTTGACCCTTCTGGGGGGGGAGATCCTATT
TTATTTCAACATTTATTT
>CNFDC396-14|Arachnida|COI-5P
GAACTCTTTATTTTATTTTCGGAGCCTGAGCTGGCTTAATGGGGTCCGCGCTAAGAGGTTTAATTCGATTAGAACTAGGA
CAGCCCGGGTCTTTAATAGAAAATGATCAAATTTACAATACCGTTGTAACCGCCCATGCTTTTGTGATAATTTTTTTTAT
AGTAATACCGACTATAATCGGAGGTTTCGGTAATTGACTAATCCCAATCATAATTGGAGCTCAAGACATAGCGTTTCCTC
GCATAAATAACATAAGATTTTGGTTACTCCCCCCTTCTCTAACCCTTCTATCTTTATCTGCATTTGCTTCTGCAGGAGTG
GGGACTGGTTGAACTGTCTACCCTCCTCTTGCTGGTAACCTTTTTCATTCAGGAATTTCGGTCGATCTCGCTATTTTTAG
TCTTCATCTAGCCGGGGCTTCTTCTATTCTGGGGGCAATTAATTTTATTACGACCATTCTAAACATACGGTCTTCTTCTA
TAACTTTGGATACGGTCCCGTTATTCGCGTGATCAGTTTTGATTACTGCAGTATTACTTCTCCTTTCTTTACCTGTTCTA
GCAGGAGCCATTACAATGTTATTAACAGATC
>MASPD896-12|Araneae|COI-5P
AAGTTTATATTTTTTATTTGGTGTATGATCAGCTATAGTGGGAACTGCAATAAGAGTTTTAATCCGAATTGAATTAGGAC
AGTCTGGTAGATTTCTTGGGGATGACCAGCTTTATAATGTTATTGTAACTGCTCATGCTTTTGTAATAATTTTTTTTATA
GTGATACCAATTTTGATTGGGGGATTTGGAAATTGATTAGTTCCTTTAATATTAGGGGCCCCAGATATAGCTTTTCCTCG
TATAAATAATTTAAGTTTTTGGCTTTTACCCCCTTCTCTTTTTATATTATTTGTATCTTCTATGGTGGATATTGGAGTAG
GGGCTGGATGAACGGTGTACCCCCCTCTAGCTTCTTTGGAGGGTCATTCGGGAAGATCTGTGGATTTTGCTATTTTTTCG
CTTCATTTAGCGGGAGCCTCGTCTATTATAGGAGCAATTAATTTTATTTCTACAATTATTAATATGCGAATGAGAGGAGT
CTCGATAGAAAAGGTCCCTCTTTTCGTTTGATCTGTTTTGATTACAGCGGTTTTATTGCTTTTATCCCTTCCCGTTCTAG
CTGGGGCTATTACTATATTATTAACAGATCGAAATTTTAATACTTCATTTTTTGATCCTTCAGGAGGAGGGGATCCAGTA
TTGTTCCAACATTTGTTT
>KKCHE1065-09|Thanatusrubicellus|COI-5P|GU683743
AACTTTATATTTAATTTTTGGTGCGTGGGCTGCTATGGTGGGTACTGCAATAAGAGTATTGATTCGAATGGAACTTGGGC
AAGTTGGAAAGTTTTTAGGTAATGATCAACTTTATAATGTAATCGTTACTGCTCATGCATTTGTTATAATTTTTTTTATA
GTTATACCAGTTTTGATTGGGGGGTTTGGAAATTGGTTGGTTCCTCTTATGCTAGGGGCACCAGATATGGCTTTTCCTCG
TATAAATAATTTAAGATTTTGATTATTACCACCTTCATTAATATTATTATTTATTTCATCAATGGTTGAGATAGGAGTAG
GGGCAGGTTGGACTGTTTATCCTCCGTTAGCATCTTTAATAGGGCATGCTGGGAGTGCTGTTGATTTTGCTATTTTTTCT
TTACATTTAGCTGGTGCGTCTTCAATTATAGGAGCCATTAATTTTATTTCTACTGTTATTAATATACGATCGTTAGGAAT
AACAATAGAAAAAGTTCCTTTATTTGTGTGATCTGTTGTTATTACTGCTGTCTTATTATTATTATCTCTTCCGGTATTGG
CTGGGGCAATTACTATATTGCTGACTGATCGAAACTTTAATACTTCATTCTTTGATCCGGCAGGAGGGGGAGATCCTATT
TTATTTCAACATTTATTT
>SSEIB4226-13|Mesostigmata|COI-5P
TACTATATACTTAATTTTTAGAGCTTGATCTGGTATAGTAGGTACATCTATAAGAATAATTATCCGAACTGAACTAGGAC
AACCAGGATCAATAATTAGAGATGATCAAATTTATAATGTAACAGTCACTGCACATGCTTTCATTATAATTTTTTTCATA
GTCATACCAGCTATAATTGGAGGATTTGGAAACTGATTAGTTCCTATTATAATTTCTGCTCCTGACATAGCTTTCCCTCG
TATAAATAATATAAGATTTTGACTCTTACCTCCCTCTTTATTATTATTACTTAGATCCTCTATAGTAGAAAGTGGAGCTG
GGACAGGATGAACAGTTTATCCTCCTCTAGCATCAAACATTTCTCATATAGGAGGTTCCGTAGATTTAGCCATTTTTTCA
TTACATTTAGCAGGAGTTTCTTCTATTCTTGGTTCTATTAATTTTATTTCCACTATCATAAATATACGACCTAAAAATAT
AACTTTAGAACGAGTACCTTTATTTGTTTGATCTGTTTTTATTACTACTATTTTATTACTTTTATCTTTACCTGTTTTAG
CAGGAGCAATTACAATATTATTAACAGATCGTAATTTTAATACTTCTTTTTTTG
>WMGSI539-10|Trombidiformes|COI-5P|HQ584631
AACCTTATATTTCGGCTTTGGTAGATGAGCTGGTATGCTGGGGGCCAGCCTAAGCTCTATTATCCGCCTAGAGCTGGGAC
AACCCGGCTCTCTCATTGGCAATGACCAAATTTACAACACCATTGTAACTGCACACGCCTTTATTATAATCTTTTTTATA
GTTATGCCAATAATAATTGGAGGATTTGGCAATTGATTAGTCCCATTAATATTATCCGCTCCAGATATAGCTTTCCCTCG
AATAAACAACATAAGCTTTTGGCTTCTCCCCCCCTCATTACTTCTTCTAGTCTCAAGATCTGTAGTATCAATAGGGGCGG
GGACTGGTTGAACAGTCTACCCCCCCCTATCAAGAAACTTAGCTCATAGTGGATCCTCAGTAGACTTAACTATCTTTTCG
CTTCATTTGGCTGGAATCTCTTCTATTTTAGGGGCTATCAATTTTATAGCTACCACACTAAATATAAAACCTAAAAGAAT
AAAGCTTGAGCAAATACCCCTCTTTGTTTGGTCAATTTTCATCACAACAATTCTCCTCCTTCTCTCACTCCCCGTTTTAG
CAGGAGCAATTACTATATTATTAACAGACCGGAACTTTAATACCTCATTTTTCGATCCTGCTGGAGGAGGAGATCCTATT
TTATATCAACACTTATTT
>SPICA1214-10|Araneae|COI-5P|JF884777
GAGTTTATATTTTGTTTTTGGGGCTTGGGCTGCTATAGTAGGAACGGCAATGAGAGTGTTAATTCGAATTGAGTTGGGGC
AAACAGGTAGATTATTTGGGGATGACCAGTTGTATAATGTTATTGTCACAGCACATGCTTTTGTTATAATTTTTTTTATA
GTAATGCCTATTTTGATTGGGGGGTTTGGAAATTGATTAGTGCCTATGATATTAGGGGCACCGGATATAGCTTTCCCTCG
TATAAATAATTTAAGATTTTGATTATTACCCCCATCCTTGTTTTTGTTATTTATTTCTAGAATAGATGAAATAGGCGTAG
GGGCTGGGTGAACAGTTTATCCCCCCTTGGCCTCTTTAGAAGGGCACTCAGGCAGTTCTGTTGATTTTGCGATTTTTTCT
TTGCATTTAGCTGGGGCATCTTCTATTATAGGGGCTATTAATTTTATTTCGACTATTATAAATATACGAGGTTATGGAAT
ATCTATAGAAAAGGTGCCTTTATTTGTGTGATCTGTGCTGATTACAGCTGTTTTATTGCTCCTATCTTTACCTGTGTTGG
CAGGGGCGATTACGATGTTGCTTACCGATCGTAATTTTAATACTTCTTTTTTTGATCCTTCTGGAGGAGGGGATCCAGTT
TTATTCCAGCATTTATTT
>TURAR209-10|Araneae|COI-5P|HM385819
GACTTTGTATTTAGTTTTTGGGGCTTGATCTGCTATAGTTGGTACAGCTATAAGAGTATTGATTCGAATTGAATTAGGGC
AACCTGGAAGATATTTGGGAGATGATCATTTATATAATGTAATTGTAACTGCTCATGCTTTTATTATGATTTTTTTTATA
GTAATACCGATTATAATTGGCGGGTTTGGAAATTGATTGGTCCCTTTAATATTGGGTGCTCCTGATATAGCTTTTCCTCG
TATAAATAATTTAAGTTTTTGATTATTACCTCCCTCTTTGTTATTATTATTTATTTCTTCAATGGCAGAAATAGGGGTTG
GGGCAGGGTGAACTGTTTATCCCCCTTTAGCTTCTACTATTGGTCATGCTGGTAGATCAGTAGATTTTGCTATTTTTTCT
TTACATTTAGCTGGGGCTTCTTCTATTATAGGAGCTATTAATTTTATTTCTACTATTTTTAATATGCGCTCATATGGAAT
AAGAATGGAAAAAGTACCTTTGTTTGTGTGATCTGTTTTAATTACTGCTGTTTTACTTTTATTGTCTTTACCCGTATTAG
CTGGTGCTATTACAATGTTATTAACAGATCGAAATTTTAATACGTCTTTTTTTGATCCTGCTGGGGGTGGGGATCCTATT
TTGTTTCAACATTTATTT
>PMWMC128-07|Trombidiformes|COI-5P
AACTCTTTACTTTGGCTTTGGAAGCTGGTCCGGAATACTTGGTGCAAGTATAAGAACAATTATCCGACTAGAATTAGGCC
AACCTGGCTCTCTTTTAGGAAATGATCAAATTTATAATACCATTGTAACAGCTCATGCTTTCGTTATAATCTTTTTTATA
GTTATACCTATAATAATTGGAGGATTTGGAAATTGACTTGTACCTCTAATACTAAGAGCTCCAGATATAGCTTTTCCTCG
AATAAACAACATAAGCTTTTGACTTCTTCCTCCCTCATTAATTTTATTAATCACAAGATCTTTAACCGCTATAGGAGCAG
GAACAGGATGAACTGTTTATCCCCCTCTTTCTGGTAATTTAGCTCATAGAGGCCCTTCAGTTGACTTAACAATCTTCTCT
CTTCATTTAGCAGGAGTCTCCTCTATTTTAGGAGCAATTAACTTTATAGCTACTATTTTAAATATAAAACCAAAGCATAT
AAAACTAGAACAAATACCTTTATTTGTATGATCAATTTTCATTACAGTTATTCTGTTACTCTTATCCTTACCTGTTTTAG
CAGGAGCTATTACTATACTTTTAACTGACCGAAACTTTAACACTTCATTCTTCGACCCAGCAGGAGGGGGAGATCCTATT
CTTTACCAACATCTCTTC
>TURAR1957-11|Araneae|COI-5P
TACTTTATATTTATTATTTGGAGCTTGGTCTGCTATAGTTGGTACTGCAATAAGAGTGTTGATTCGAATTGAGTTAGGAC
AACCTGGTAGATTTTTAGGAGATGATCATTTGTATAATGTTATTGTAACTGCTCATGCTTTTGTTATAATTTTTTTTATA
GTTATACCAATTTTAATTGGTGGGTTTGGAAATTGATTAGTTCCTTTAATGTTAGGGGCTCCTGATATAGCTTTTCCTCG
AATAAATAATTTAAGTTTTTGATTATTACCTCCTTCTTTATTTTTATTATTTATTTCTTCAATAGTGGAAATAGGAGTAG
GAGCAGGTTGAACAGTGTATCCTCCATTGGCTTCTATTATAGGGCATGCTGGAAGATCTGTTGATTTTGCTATTTTTTCT
TTACATTTAGCTGGAGCTTCTTCTATTATAGGAGCTATTAATTTTATTTCTACTATTTTAAATATACGTGGGTATAGAAT
AAGAATGGATAAGGTTCCTTTATTTGTTTGATCTGTTTTGATTACTGCAGTACTTTTATTATTGTCTTTACCTGTTTTAG
CTGGAGCTATTACAATATTATTGACTGATCGAAATTTTAATACTTCTTTTTTTGATCCCGCAGGAGGTGGTGATCCTATT
TTATTTCAACATTTATTT
>CNGIE403-12|Trombidiformes|COI-5P
AACATTATATTTTATTTTTGGGTTTTGATCTGGCTTATTAGGAGCGTCTATAAGAATTATTATTCGTATAAAATTAGCTA
ATCCTGGGTTTATAGGCCAAAATGATCAGATTTATAATGTTACTGTTACAGCCCACGCATTTGTTATAATTTTTTTTATA
GTAATACCAATTATAATTGGAGGATTTGGTAATTGATTAGTTCCCATTATAATTGGTGCTCCAGATATGGCTTTTCCTCG
TATAAATAATATAAGATTTTGACTTCTACCTCCTTCCATTTGTATATTATTACTGTCATCATTTGCTGAAAGAGGAGCAG
GAACAGGGTGAACTGTTTATCCTCCATTATCAAATTATTTATTCCATGGGGGTATCTCAGTTGATTTAACTATTTTTTCT
TTACATATAGCAGGAATTTCATCTATTTTGGGAGCTATTAATTTTATTACAACTATTTTAAATATACGTATAAGAATAAT
AACTTTTGAACGTCTTCCTTTATTTGTTTGATCTGTTTTAATTACCGCTATTTTACTTTTGCTGTCTTTACCAGTTTTAG
CAGGAGCTATTACTATGCTTTTAACTGATCGAAATTATAATACTTCTTTTTTTGATCCTGCAGGAGGAGGAG
>SIOCA017-10|Trombidiformes|COI-5P|JN309443
AACTCTATACTTTGCTTTTGGGGCATGATCAGGAATAGTGGGAGCCAGACTTAGAAGCCTTATTCGCCTTGAATTAGGAC
AACCAGGAAGACTTATATTCAATGACCAAGTTTACAACACCATTGTAACAGCTCACGCATTTATCATAATCTTTTTTATA
GTAATACCTATAATAATCGGGGGTTTCGGAAATTGGTTAGTCCCTCTAATATTATCAGCCCCAGATATAGCATTCCCACG
AATAAACAACATAAGCTTTTGATTACTTCCCCCTTCTCTGACACTTTTACTCTCAAGATCATTTACCTCTATAGGAGCAG
GGACAGGCTGAACCGTATACCCACCTCTAGCAAGAAATATTGCACACTCGGGTCCTTCGGTAGACCTTGCAATTTTTTCT
CTTCATTTAGCAGGGGTGTCTTCAATCCTAGGGGCCATTAATTTCATAGCTACAACCATAAACATAAAGCCTCTTTCAAT
AAAAATCGATAAAATACCCCTCTTCGTTCTATCAATTTTTATCACTACCATTCTCCTTCTTCTCTCATTACCAGTATTGG
CAGGGGCTATTACTATACTATTAACAGATCGAAACTTTAACACATCATTTTTTGACCCAGCTGGAGGTGGGGACCCTATT
CTATACCAACACTTATTC
>CNPCE154-13|Sarcoptiformes|COI-5P
AACTTTATATTTTATTTTCGGTGCTTGAGCGGGACTTCTTGGATCAGCCCTAAGAGGTTTAATTCGACTAGAATTAGGAC
AACCAGGATCTTTAATAGAAAATGATCAAATTTATAACACAATCGTGACAGCCCATGCCTTTGTTATAATTTTTTTTATA
GTTATGCCAGCTATAATTGGAGGATTCGGAAATTGGCTAGTTCCGATAATAATTGGGGCACAAGACATGGCTTTCCCCCG
TATGAATAACATAAGATTTTGGTTGTTACCCCCTTCATTGACTTTACTTTCGGCTTCTGCGTTTGCGGGAGTGGGAGCGG
GAACAGGATGGACTGTGTATCCTCCTCTTTCTGGTAACTTATTCCATTCGGGGATCTCAGTCGATCTTGCTATTTTTAGG
CTTCATTTAGCAGGAGCTTCTTCTATTTTAGGGGCAATTAATTTCATCACAACAATCATAAATATACGAAGCTCTTCCTT
ATCGTTGGACTCAATCCCACTATTTGTCTGATCCGTGCTAATCACAGCTGTCTTACTTCTATTATCTTTACCTGTATTGG
CCGGGGCAATTACGATATTATTAACAGACCGAAATTTTAACACCTCGTTTTTTGATCCGTCAGGGGGAGGGG
>SPIRU774-11|Araneae|COI-5P|JN310247
TACTTTATATTTTATTTTTGGGGCTTGAGCTGCAATAGTGGGAACTGCTATAAGAGTGTTAATTCGGATTGAGTTAGGGC
AAACTGGGAGATTACTAGGGGATGACCAGTTATATAATGTAATTGTTACAGCACATGCTTTTGTTATAATTTTTTTTATA
GTGATACCTATTTTAATTGGGGGGTTTGGGAATTGGTTAGTCCCTTTAATATTAGGGGCTCCTGATATAGCCTTTCCTCG
TATAAATAATCTTAGATTTTGGCTTTTACCTCCCTCTCTATTTTTACTATTTATTTCTAGAATAGATGAGATAGGTGTAG
GGGCAGGATGAACAGTTTATCCTCCTCTTGCTTCTTTAGAAGGGCATTCGGGTAGATCAATAGATTTTGCTATTTTTTCT
TTACATTTGGCAGGGGCATCTTCTATTATAGGGGCTATCAATTTTATTTCAACTATTATAAATATACGAGGGTATGGGGT
AACTATAGAAAAAGTTCCTTTATTTGTATGGTCTGTATTGATTACTGCCGTATTGTTACTTTTGTCTCTTCCAGTTTTAG
CAGGGGCTATTACTATATTATTAACAGATCGTAATTTTAATACGTCTTTTTTTGATCCGTCTGGTGGAGGGGATCCTGTT
TTATTTCAACATCTATTT
>MBIOC038-13|Arachnida|COI-5P
TACTATATATTTTATATTTAGTTTGTTTGCTGGACTAATTGGTACTACTATAAGAATTATTATTCGAATAGAATTAATAC
AACCAGGTTCTTTAATTCAAAACGATTTTTTTTATAATTCATTAGTTACTAGTCATGCTATAATTATAATTTTTTTTATA
GTTATACCGGCTATAATTGGAGGATTTGGTAATTGATTAATTCCTATAATAATAAATAGAGTTGATATGTGCTTTCCACG
TTTAAATAATATAAGTTTTTGAATATTAATTCCTTCTATCATTCTTATATTAAATTCTTCTATAAACAAAATTCTTAATG
GAGTAGGTTGAACTATATATCCTCCTTTAACTAGTTTCATATTTAATTCTAGAGCTTCTATTGAGATAATAATTTTTTCA
TTACATATTGCTGGAATTTCATCCATTATAAGTTCTATTAATTTTATCACTACTATTTTAAATTTAAAAAATGTTAATTT
AAACAATAATAGAGTATCTTTATTTTCTATTTCAATTTTAATTACTACATCTTTATTAATTTTAGCTTTACCTGTTTTAG
CTGGAGCAATTACTATAGTACTTACAGATCGAAATTTTAAT
>CNSLI045-12|Trombidiformes|COI-5P
AACTATATATTTTTATTTTGGAATATGATCAGGAATATTAGGTGCTGCGATAAGTCTTTTAATTCGTTTGGAATTAACTC
AACCAGGTTCTCTTTTAGAAAATGATCAAATTTATAATACAATTGTAACTGCTCATGCCTTTGTTATGATTTTTTTTATA
GTTATACCAATTATAATTGGTGGATTTGGTAATTGATTAGTTCCTATTATAATTGGAGCTCCAGATATAGCTTTCCCTCG
AATAAATAATATAAGATTTTGATTATTACCTCCTTCTTTATCTCTTTTAATATTATCAGCTTTTACCTCAAAAGGAAGAG
GGACTGGATGAACTGTATATCCACCTTTATCCAATAATATATCACATTCTGGTGCATCTGTAGATTTAACTATTTTTTCA
TTACATTTAGCTGGAATCAGATCTATTTTAGGGGCTATTAACTTTATAACCACTATTATTAATATAAAAACTTCTTACTT
AAGATTTGAACAAATTCCTTTATTTGTGTGATCAGTTTTTATTACCACCATTTTATTATTATTATCATTACCTGTTTTAG
CAGGGGCTATTACTATACTTTTAACAGATCGTAATTTTAACACTTCTTTTTTTGATCCCATTGGGGGAGG
>TURAR385-10|Araneae|COI-5P|HQ982745
AACTTTATATTTAATTTTTGGAGCTTGAGCTTCTATAGTTGGGACTGGAATGAGAGTTTTGATTCGAATAGAATTAGGAC
AATCTGGTGGATTGCTAGGAGATGATCATCTTTATAATGTTATTGTGACTGGTCATGCTTTTATTATAATTTTTTTTATA
GTGATGCCTATTTTAATTGGGGGTTTTGGTAATTGGTTAGTTCCTTTAATATTAGGAGCTCCAGATATAGCTTTTCCTCG
TATAAATAATTTATCTTTTTGATTATTACCTCCTTCTTTGTTATTATTGTTTATTTCTTCTATAGTTGAGATAGGTGTGG
GAACTGGATGAACTGTATACCCTCCTTTGGCTTCTATTATTGGTCATGAAGGAAGAGCTATAGATTTTGCTATTTTTTCT
CTTCATTTGGCTGGTGCTTCTTCTATTATAGGAGCTATTAATTTTATTTCTACTATTATAAATATACGTTCTTTAGGGAT
AAGTATAGAAAAAGTGCCTTTGTTTGTTTGGTCAGTTTTGATTACTGCTATTTTATTATTATTATCTTTACCTGTATTAG
CAGGTGCTATTACTATGCTTTTAACTGATCGAAATTTTAATACTTCTTTTTTTGACCCTGCAGGGGGAGGAGATCCCGTT
TTATTTCAACATTTATTT
>SSBAD4036-12|Trombidiformes|COI-5P
TACTTTATATTTTATTTTTGGGTTTTGATCTGGTTTATTAGGGGCTTCTATAAGAATTATTATTCGTTTAAAATTAAGTA
ATTCTGAATTTTTAGGACATAATGACCAAATTTATAATGTGATAGTAACTTCTCATGCTTTTGTAATAATTTTTTTTATG
GTAATACCAATTATAATTGGAGGTTTTGGAAATTGATTAGTGCCAATAATAATTGGGGCACCTGATATAGCTTTTCCACG
AATAAATAATATAAGATTCTGATTATTACCTCCTTCTATAATAATGCTATTATTATCTTCATTTGCAGAAAGTGGAGCTG
GAACTGGTTGAACAGTTTACCCTCCTTTATCTAATTATTTATTTCATGGCGGAATATCTGTTGATTTAACAATTTTTTCT
TTACACATAGCTGGAATATCATCAATTTTAGGTGCAATTAACTTTATTACAACTATTGTGAATATACGTTCCAGCTATAT
AATTTTTGAACGCTTACCTTTATTTGTTTGATCTGTTTTAATTACTGCTGTTTTACTTTTACTATCATTACCTGTTTTAG
CTGGTGCTATTACTATACTATTAACAGATCGAAATTTTAATACTTCATTTTTTGACCCTGCAGGTGGTGGAGA
>MBIOF1623-13|Arachnida|COI-5P
TACTATATATTTAATTTTTGCGGCCTGAGCCGGTATACTAGGGACAGCGTTAAGTATAATTATTCGAGCTGAACTTGGAC
AACCAGGATCTTTAATTGGGGACGACCAAATTTATAATGTTGTCGTTACTGCCCATGCCTTTATTATAATTTTCTTTATA
GTTATACCCGCCCTAATTGGAGGGTTCGGGAACTGGCTGGTACCATTAATAGTATCAGCTCCAGATATGGCTTTCCCACG
AATAAATAACATAAGTTTCTGACTTTTACCGCCTTCCCTATTACTGTTACTTAGTTCATCAATAGTAGAATCAGGTGCAG
GAACAGGTTGAACGGTTTATCCGCCTCTAGCTGGAAATTTATCTCACAGAGGGGGTGCTGTGGACCTTGCCATTTTCTCT
TTACATTTAGCTGGTATTTCATCTATTTTAGGCTCTATTAATTTTATTACGACTATTATAAACATACGACCAAAGGAAAT
AACTATAGAACGAATACCTTTATTTGTTTGATCTGTTTTTATTACTACAATCTTACTACTTCTTTCATTACCTGTTTTAG
CTGGAGCAATTACTATACTTTTAACAGACCGAAATTTTAATACTTCTTTCTTTGACCCTAGTGGTGGTGG
>TURAR922-10|Araneae|COI-5P|HQ983061
TACATTATATTTGGTTTTTGGGGCTTGAGCTGCAATGGTTGGAACTGCTATAAGAGTTTTAATTCGGGTTGAATTAGGTC
AACCTGGAAGATTTTTAGGTGATGATCAATTATATAATGTGATTGTAACGGCTCATGCTTTTGTAATAATTTTTTTTATA
GTTATACCTATTTTAATTGGAGGATTTGGTAATTGATTAGTGCCTTTAATGTTAGGTGCTCCTGATATAGCTTTTCCTCG
AATAAATAATTTGAGATTTTGATTATTACCACCTTCATTAATTTTATTATTTATTTCTAGAATGGTGGAAATAGGAGTAG
GTGCTGGTTGAACAGTATACCCTCCATTATCATCTTTAGATGGTCATGGTGGGAGTTCTGTAGATTTTGCCATTTTTTCT
CTTCATTTAGCTGGAGCTTCTTCAATTATAGGTGCTGTAAATTTTATTACTACTGTAATAAATATACGATCTTATGGGAT
GACAATAGAAAAAGTACCTTTATTTGTATGATCTGTATTAATTACTGCTGTATTATTGTTATTGTCATTGCCTGTTTTAG
CTGGAGCTATTACTATATTATTAACTGATCGAAATTTTAATACATCATTTTTTGACCCAGCGGGTGGGGGAGATCCTATT
TTATTTCAACATTTATTT
>MIONB497-11|Trombidiformes|COI-5P
TACAATATACTTTGCATTAGGGATATGATCAGGTATAATAGGTACCAGACTTAGAATAATTATTCGAACCGAATTAGCTC
AACCATCAACCATTTTAGGAAACGATCAAATCTACAACGCTACAGTAACTGCACATGCATTTATCATAATCTTCTTTATA
GTTATACCCACTATAGTAGGTGGATTCGGTAACTGATTAGTTCCAATATTTATTAGAGCACCAGATATAGCATTTCCTCG
ATTAAACAATATAAGTTTCTGACTTTTAATTCCTTCACTATCCCTATTAAGTTTATCATTATTTTCATCATCAGGAGCAG
GGACTGGTTGAACAGTCTACCCACCGCTCTCAGGAAATATATCTCATTCAGGAAGAGCTGTAGATTTAACCATCTTCTCG
CTTCACCTGGCAGGAATTTCCTCAATTCTAGGAGCAATTAACTTTATAGCAACAGTTATAAACATAACACCAAACTCTAT
AACATGAGAAAGAATTCCCTTATTTGTATGATCAATTTTTATTACAGCAATCCTCCTCCTCCTTTCTTTACCAGTACTAG
CAGGAGCCATTACAATATTACTAACAGACCGAAATCTTAATACATCATTTTTCGACCCATCAGGAGGTGGGGACCCAATC
TTATACCAACATCTATTC
>TGBT008-10|Ixodida|COI-5P
AACAATATACTTGATTTTTGGAAGGTGAGCCGGAATAGCGGGATTATCTATAAGAATTTTAATTCGAATAGAACTAGGCC
AACCCGGTACATTAATTGGAAATGATCAAATTTATAATGTTATTGTAACAGCCCATGCATTTATTATAATTTTTTTTATA
GTTATACCAATTATAATCGGAGGATTCGGAAACTGGCTTGTACCCATTATGCTTGGAGCTCCAGATATAGCTTTTCCTCG
GATAAATAATATAAGTTTTTGACTTCTTCCCCCATCTCTTTGTCTTTTAATCAACTCTTCTCTTGTGGAATCCGGAGCCG
GAACCGGCTGAACAGTTTACCCCCCATTGTCATCAAACATTTCTCATTATGGTCCTTCAGTGGATTTAGCTATTTTTTCA
CTTCATTTAGCTGGGGCTTCATCTATTTTAGGTTCAATTAATTTTATTACTACAATTATTAATATACGCTCCATTGGAAT
GACAATAGAGCGAATCCCTTTATTTGTATGATCAGTGTTTATTACTACCATTCTCCTCCTCCTGTCTCTCCCAGTTTTAG
CTGGAGCAATTACCATATTACTTACAGATCGGAATTTTAATACCTCATTTTTTGATCCTTCAGGGGGAGGAGATCCAATT
TTATATCAACATCTATTT
>SPIEU1306-11|Araneae|COI-5P
AACTTTATATTTAATCTTTGGTGCATGAGCTGCTATAGTAGGAACTGCAATAAGAGTATTGATTCGGATAGAGTTAGGTC
AGGTTGGAAAGTTTTTAGGTGATGATCAATTATATAATGTGATTGTTACGGCACATGCATTTGTCATGATTTTTTTTATA
GTAATACCAATTTTAATTGGTGGATTTGGTAATTGATTAGTTCCATTAATGTTAGGGGCTCCTGATATAGCTTTTCCTCG
AATAAATAATTTAAGTTTTTGATTATTGCCTCCTTCATTAATGTTATTATTTATTTCTTCTATAGTTGAAATAGGTGTGG
GTGCAGGATGGACTATTTATCCTCCATTAGCATCACTAATAGGGCATGCTGGAAGTGCTGTTGATTTTGCAATTTTTTCT
CTTCATTTAGCAGGTGCTTCCTCTATTATAGGGGCTATTAATTTTATTTCTACTATTATTAATATACGATCATTAGGGAT
AACAATGGAAAAAGTACCATTATTTGTATGATCAGTTGTTATTACTGCTGTATTATTACTATTATCTCTACCAGTTTTGG
CTGGTGCGATTACCATATTGTTAACTGATCGAAATTTTAATACCTCGTTTTTTGATCCGGCTGGGGGAGGGGATCCTATT
TTATTTCAACATTTATTT
>MYMCC675-11|Rhysotritiaardua|COI-5P|JX835349
AACACTCTACTTTATATTCGGGGTGTGGGCAGGATCCATAGGATCCTCGTTGAGAGCAATTATTCGGTTAGAATTAAGTA
AGCCGGGGTCTTTTTTAGAAAACGATCAAATTTACAACACAATTGTCACTTCTCACGCCTTCGTGATAATTTTCTTTACT
GTTATACCTATTATAATCGGTGGTTTTGGGAATTGACTGGTTCCTCTAATGATTGGCGCTCAAGATATAGCCTTTCCTCG
TATAAACAACATAAGATTCTGGCTCTTGCCCCCCTCTATTTTCCTCTTAATGACTTCTTCTTTATCAGGGGTTGGTGCTG
GAACAGGATGGACCGTGTACCCACCTTTATCTTCCGTTAGTTTTCATTCACACAGAGCAGTAGACATAACTATCTTCAGT
CTACACTTAGCTGGTGTTTCGTCCATTCTGGGGGCCATTAATTTTATTAGTACAATCGCTAACATGCGAACTCCTCGCAT
GTCTTTAGACAGGACACCACTGTTTGTTTGATCAGTGTTGATCACAGCAATTTTGTTACTATTGTCTCTCCCGGTTTTGG
CAGGTGCAATTACTATGCTCCTAACAGATCGAAATTTCAATACGTCTTTTTTTGATCCAACGGGTGGAGGGGACCCCATT
CTTTACCAGCACCTATTT
>BBUSA144-10|Araneae|COI-5P|HQ931135
AACTTTATATTTAATATTTGGTGTTTGATCAGCAATAACGGGTACTGCAATAAGAGTGTTGATTCGAATGGAGTTAGGTA
ATTCTGGTAGTTTATTGGGTGATGATCATTTGTATAATGTGATTGTTACTGCTCATGCCTTTGTGATAATTTTTTTTATA
GTAATACCAATTCTTATTGGGGGATTTGGAAATTGATTAGTTCCTTTAATATTAGGGGCCCCTGATATATCATTTCCTCG
GATAAATAATCTTTCTTTTTGGTTGTTACCTCCTTCTTTATTTTTATTGTCTATATCGTCTATAGTGGAGATAGGTGTAG
GAGCTGGTTGAACTGTTTATCCACCTTTGGCTTCTAGAATAGGTCATATAGGGAGTTCTATAGATTTTGCTATTTTTTCG
CTTCATTTAGCGGGTGCTTCTTCTATTATAGGAGCAGTAAATTTTATTTCTACTATTATTAATATGCGAATATTAGGAAT
ATCAATGGAGAGGGTGCCTTTGTTTGTGTGATCTGTGTTAATTACTGCTATTTTATTATTACTTTCTTTACCTGTTTTAG
CGGGTGCTATTACCATATTATTAACGGATCGTAATTTTAATACTTCTTTTTTTGACCCGGCAGGTGGAGGGGATCCAATT
TTGTTTCAACATTTATTT
>GMCRG007-13|Araneae|COI-5P
ACTTTATATTTAATGTTTGGTGTTTGATCTGCTATAATAGGAACTGCTATAAGAGTATTGATTCGTATAGAGTTAGGGAA
TCCTGGAAGTTTATTAGGAGATGATCATTTATATAATGTAATAGTTACCGCTCATGCTTTTGTAATAATTTTTTTTATAG
TTATGCCAATTCTTATTGGTGGTTTTGGAAATTGATTAATTCCTTTAATGTTGGGGGCTCCTGATATGTCATTTCCTCGA
ATAAATAATCTTTCTTTTTGGTTATTACCTCCTTCTTTATTTTTGTTATCTATGTCTTCTATAGTAGAAATAGGTGTTGG
AGCTGGTTGAACTGTATACCCTCCTTTAGCTTCAAGAGTGGGACATATGGGAAGTTCTATAGATTTTGCTATTTTTTCTC
TTCATTTGGCCGGGGCTTCTTCTATTATAGGTGCTGTTAATTTTATTTCTACTATTATTAACATACGAATATTAGGAATA
TCTATAGAAAAGGTTCCATTATTTGTATGATCAGTATTAATTACTGCTATTTTATTATTACTTTCTTTGCCTGTTTTAGC
AGGTGCTATTACTATGTTGTTGACGGATCGGAATTTTAATACTTCTTTTTTT
>SPICH1107-09|Dismodicusdecemoculatus|COI-5P|GU684625
AAGTTTATATTTTGTTTTTGGTGCTTGGGCTGCTATAGTAGGAACAGCAATAAGTGTTTTAATTCGAGTTGAGTTGGGTC
AAGTAGGTAGATTATTAGGGGATGATCAATTATATAATGTAATTGTTACAGCGCATGCTTTTGTTATAATTTTTTTTATG
GTTATGCCTATTTTAATTGGGGGGTTTGGCAATTGGCTTGTTCCTTTGATGTTAGGGGCTCCAGATATAGCTTTTCCTCG
AATAAATAATTTGAGATTTTGATTATTGCCCCCATCTTTATTATTATTATTTATTTCTAGAATGGATGAGATGGGAGTAG
GGGCAGGATGAACGGTGTATCCGCCTCTTGCTTCTTTGGAGGGCCATCCTGGCAGATCAGTAGATTTTGCTATTTTTTCC
TTACATCTAGCAGGGGCTTCGTCTATTATGGGGGCTATTAATTTTATTTCTACTATTTTTAACATGCGCGGGTATGGGAT
GACATTGGAAAAGGTTCCCTTATTTGTTTGATCCGTGCTAATCACAGCTGTATTATTATTGCTATCGTTACCTGTTTTAG
CGGGGGCTATTACTATACTTTTAACAGATCGTAATTTTAATACATCTTTTTTTGATCCGTCTGGGGGAGGAGACCCTGTT
TTATTTCAGCATTTGTTT
>GBADC047-10|Aculepeiracarbonarioides|COI-5P|HQ956708
TACTTTATATTTAATTTTTGGTGCTTGGGCTGCTATAGTAGGTACGGCTATAAGAGTATTAATTCGAGTTGAATTAGGTC
AACCAGGAAGGTTTTTAGGAGATGATCAATTATATAATGTAATTGTAACAGCACATGCTTTTGTAATAATTTTTTTTATA
GTAATACCTATTTTAATTGGGGGCTTTGGAAATTGATTAGTTCCTTTAATATTAGGAGCTCCTGATATAGCATTTCCTCG
AATAAATAATTTAAGATTTTGATTATTACCACCCTCATTGTTTTTATTAATTGTGTCTTCAATAGTAGAAATGGGAGTAG
GGGCCGGGTGAACTGTTTATCCTCCATTAGCTGGGTTAGAAGGACATGCTGGTAGATCAGTGGATTTTGCAATTTTTTCT
TTACATTTGGCTGGGGCTTCTTCAATTATAGGTGCCATTAATTTTATTTCAACAATTATTAATATACGATCTTATGGAAT
AACTATGGAAAAGGTTCCTTTATTTGTGTGGTCTGTTTTAATTACGGCTGTTTTATTGCTTCTTTCTTTACCCGTTTTGG
CTGGGGCTATTACAATATTATTAACGGATCGAAATTTTAATACATCTTTTTTTGATCCTTCAGGTGGTGGAGACCCAATT
TTATTTCAACATTTATTT
>CENAM182-12|Araneae|COI-5P
AACATTATATTTAATATTTGGTGCTTGGGCTGCTATAGTTGGAACAGCAATAAGAGTATTAATTCGAATTGAGTTAGGTC
AAACGGGAAGATTTATAGGGGATGATCAATTATATAATGTAATTGTAACTGCTCATGCTTTTGTAATAATTTTTTTTATA
GTTATACCAATTTTGATTGGAGGGTTTGGTAATTGATTGGTACCTTTAATATTAGGTGCTCCTGATATAGCTTTTCCTCG
AATAAATAATTTAAGATTTTGATTATTACCTCCTTCTTTATTTTTATTGTTTATTTCTTCTATAGTGGAAATAGGAGTTG
GTGCTGGATGAACAGTATATCCTCCATTATCTTCATTGGATGGACATGGAGGGAGATCAGTGGATTTTGCAATTTTTTCT
TTACATTTGGCTGGGGCTTCTTCTATTATGGGTGCTATTAATTTTATTTCTACTATTTTAAATATACGTTCTTATGGGAT
AAGAATAGAAAAAGTGCCATTATTTGTTTGATCTGTATTAATTACTGCTGTTTTATTATTATTATCTTTACCTGTTCTAG
CAGGGGCTATTACTATATTATTAACTGATCGAAATTTTAATACTTCTTTTTTTGATCCTGCAGGAGGAGGGGATCCTATT
TTGTTTCAACATCTATTT
>SSPAA8005-13|Sarcoptiformes|COI-5P
AACTTTATATTTCATTTTTGGGGCTTGGGCGGGACTTTTGGGGTCGGCTCTCAGAGCTTTAATTCGATTAGAATTAGGAC
AACCCGGATCTCTTATAGAAAACGACCAAATTTATAACACAATTGTTACAGCACATGCTTTTGTAATAATTTTCTTTATA
GTAATACCAGTAATAATTGGAGGATTTGGTAACTGACTTGTTCCTATAATAATCGGAGCTCAAGACATAGCCTTCCCTCG
GATAAACAACATAAGTTTCTGATTATTACCTCCTTCTTTAACATTACTTTCAGCCTCTGCTTTTGCGGGAATAGGAGCTG
GTACTGGATGAACCGTGTACCCCCCTTTAGCAGGCAATCTATTTCATTCAGGATTTTCGGTTGATCTAGCAATTTTTAGA
CTCCATTTAGCAGGTGCTTCATCTATTTTAGGAGCCATTAATTTTATTACAACTATTATAAACATACGTTCCTCTTCAAT
GACCTTAGATTCAATTCCATTGTTTGTATGATCAGTGTTAATTACTGCTGTTTTATTATTATTATCATTACCAGTTCTGG
CTGGAGCAATTACTATATTATTGACAGACCGAAATTTCAATACCTCTTTTTTTGACCCAGCAGGAGGAGGGG
>SSJAC1515-13|Trombidiformes|COI-5P
AACTTTATATTTTATTTTTGGTTTTTGATCTGGTATTTTAGGAGCTTCAATAAGTATTATTATTCGTATAAAGTTGGCTA
ACCCAGGATTTATAGGCCAAAATGATCAAATTTATAATGTTATAGTTACTGCTCATGCTTTTGTAATAATTTTTTTTATG
GTAATACCTATTATAATTGGAGGTTTTGGAAATTGATTAGTTCCTTTAATAATTGGTGCTCCTGATATAGCTTTCCCTCG
TATAAATAATATAAGTTTTTGATTATTACCCCCCTCTTTATTAATATTGTTATTGTCTTCATTTGCTGAGAGAGGAGCAG
GAACTGGATGGACTGTTTATCCTCCTTTATCAAATTATTTATTTCATGGGGGAATTTCTGTAGATTTAACTATTTTTTCT
TTGCATATAGCAGGAATTTCATCTATTTTAGGTGCTATTAATTTTATCACAACAATTTTAAATATGCGAATAAGAATAAT
AAACTTTGAACGTTTGCCTTTATTTGTTTGATCAGTATTAATTACTGCAATTTTATTATTATTATCTCTTCCTGTGTTAG
CAGGAGCTATTACAATATTGTTGACTGACCGAAATTATAATACTTCATTTTTTGATCCTGCTGGTGG
>SPRMA058-10|Araneae|COI-5P|HQ977147
CACATTATATTTAGTTTTTGGGGTTTGGTCCGCTATAGTAGGGACAGCAATAAGAGTCCTAATTCGAGTGGAATTAGGTC
AGCCGGGTAGATTACTAGGAGATGATCAATTATATAATGTTATTGTAACAGGGCATGCTTTTATCATAATTTTTTTTATA
GTAATACCAATTTTGATTGGGGGGTTTGGGAACTGGTTAGTCCCTTTAATACTGGGGGCTCCAGATATAGCTTTCCCGCG
AATAAATAATTTGAGATTCTGATTGTTACCACCTTCCCTACTCCTGTTATTTATCTCTTCTATGGAGGAAATAGGAGTAG
GGGCTGGTTGAACTATTTACCCCCCTTTGTCCTCGTTAGAAGGACACAGAGGAAGATCTGTAGATTTTGCAATTTTTTCG
TTACATTTGGCCGGGGCTTCTTCTATTATAGGAGCTATCAATTTTATTTCAACTATTTTAAATATACGAATAGTTGGGAT
AAAAATGGAAAAATTAAGATTGTTTGTGTGATCAGTTTTGATTACAGCTGTGCTCTTATTACTTTCGTTACCTGTTTTAG
CAGGGGCTATTACAATACTATTAACCGATCGGAATTTTAATACTACTTTTTTCGACCCTGCTGGGGGGGGAGATCCTATC
TTATTTCAGCATTTATTC
>AEDNA306-12|Mecynarguspaetulus|COI-5P|KC502591
AAGTTTGTATTTTATTTTTGGGGCTTGAGCTGCTATAGTAGGAACAGCAATAAGAGTTTTAATTCGAATTGAGTTGGGGC
AAATTGGTAGATTATTGGGTGATGATCAGTTATATAATGTTATTGTAACGGCTCATGCTTTTGTTATAATTTTTTTTATA
GTTATACCTATTTTAATTGGAGGTTTTGGTAATTGGTTGGTGCCCCTAATATTAGGGGCACCTGATATAGCATTTCCTCG
AATAAATAATTTAAGATTTTGATTATTACCTCCTTCGTTATTTCTTTTGTTTATCTCTAGAATAGATGAGATAGGGGTTG
GAGCAGGATGAACCGTTTATCCCCCTCTTGCTTCTTTAGAGGGTCATTCTGGTAGTTCTGTCGATTTTGCTATTTTTTCT
TTACATTTGGCTGGGGCATCCTCAATTATAGGGGCTATTAATTTTATTTCTACTATTTTGAATATGCGTGGGTATGGTAT
AACTATAGAAAAAGTCCCTTTGTTTGTATGATCTGTTTTAATTACAGCTGTATTGTTGTTATTATCTTTACCTGTATTGG
CAGGAGCTATTACTATACTTTTAACTGATCGAAATTTTAATACTTCATTTTTTGATCCTGCTGGGGGAGGGGATCCAGTT
TTATTCCAACATCTATTT
>PMWMC142-07|Trombidiformes|COI-5P
AACCTTATATTTTGGATTCGGTAGATGAGCTGGCATGCTCGGAGCAAGTATAAGAACTATTATCCGTCTAGAATTAGGGC
AACCAGGTTCTCTAATCGGAAATGACCAAATCTATAACACTATTGTAACCGCCCACGCTTTTGTAATAATTTTCTTTATA
GTAATACCCATAATAATTGGAGGATTTGGAAATTGATTAGTACCTTTAATATTAAGAGCCCCAGACATAGCATTTCCCCG
AATAAATAATATAAGATTTTGATTACTACCCCCTGCTATTATTCTACTAACTACTAGCTCTTTAACAGCTATAGGGGCAG
GAACTGGATGAACCGTTTATCCCCCCTTGTCAGGTAACTTAGCTCACAGAGGACCATCAGTAGATTTAACAATTTTTTCA
CTTCATCTGGCTGGTGTTTCTTCGATTTTAGGAGCTATTAATTTTATAGCAACAATTTTAAATATAAAGCCAAAACATAT
AAAACTAGAACAAATACCTTTATTCGTTTGATCAATTTTTATTACAACCATCTTACTTCTCCTATCCCTCCCTGTTTTAG
CAGGTGCTATCACAATATTACTAACTGACCGAAATTTTAATACTTCTTTTTTTGATCCAGCAGGTGGGGGAGATCCTATC
CTATATCAACATCTTTTT
>CHEFI770-12|Araneae|COI-5P
AACTTTATATTTTATTTTTGGGGCTTGAGCTGCTATAGTGGGCACTGCGATAAGAGTATTAATTCGAATTGAGTTAGGGC
AAACTGGAAGAATATTGGGGGATGACCAATTATATAATGTGATTGTGACTGCTCATGCTTTTGTTATAATTTTTTTTATG
GTTATACCTATTTTAATTGGGGGGTTTGGAAATTGGTTAGTACCATTAATATTGGGGGCTCCTGACATGGCTTTTCCACG
GATAAATAATTTAAGATTTTGGTTGCTACCCCCTTCTTTATTATTATTATTTATTTCAAGAATAGTAGAAATAGGAGTTG
GAGCAGGTTGGACAGTGTATCCGCCTCTTGCTTCTTTAGAAGGTCATGCCGGGAGTTCTGTGGATTTTGCTATTTTTTCC
CTTCATTTAGCTGGGGCATCTTCAATTATAGGGGCTATTAATTTTATTTCGACTATTGTGAATATACGTGGATATGGGGT
TTCTATGGAAAAAGTTCCTTTATTTGTGTGATCTGTTTTAATCACTGCTGTTTTGTTGTTATTATCTCTACCTGTGTTAG
CAGGTGCTATTACGATATTGTTGACTGATCGAAATTTTAACACTTCTTTTTTTGATCCTGCTGGGGGAGGAGATCCTGTG
TTATTTCAACATTTATTT
>TWSC066-07|Arctosainsignita|COI-5P|KF367858
ACTTTATATTTGATATTTGGATTGTGATCTGCTATAGCAGGTACTGCTATAAGAGTGTTGATTCGTTTAGAATTAGGACA
TTCTGGAAGTCTTTTAGGGGATGATCATTTGTATAATGTTGTAGTTACTGCTCATGCTTTTGTTATAATTTTTTTTATAG
TAATACCTATTTTGATTGGTGGATTTGGAAATTGATTAATTCCTTTAATATTAGGAGCTCCTGATATATCTTTTCCACGA
ATAAATAATCTTTCTTTTTGATTGTTACCTCCTTCTTTGTTTTTATTGTTTATATCATCTATAGTAGAGATAGGAGTGGG
AGCAGGGTGAACTGTTTATCCTCCTTTAGCTTCTAGAGTAGGACATATAGGAAGTTCTATAGATTTTGCTATTTTTTCTC
TTCATTTGGCAGGTGCTTCTTCTATTATAGGGGCGGTGAATTTTATTTCTACTATTATTAATATGCGTTTAGTAGGAATA
AGAATGGAAAAGGTTCCATTATTTGTTTGATCGGTGTTGATTACAGCTGTTTTATTACTACTTTCTTTACCTGTTTTAGC
AGGGGCTATTACTATATTGTTAACGGATCGTAATTTTAATACTTCTTTTTTTGATCCAGCGGGAGGAGGGGATCCTATTT
TGTTTCAACACTTATTT
>TURAR1054-10|Araneae|COI-5P|HQ982567
AAGTTTATATTTTATTTTTGGGGCTTGGGCTGCTATAGTTGGAACAGCGATAAGAGTTTTAATTCGGATTGAGTTAGGTC
AAACTGGAAGATTATTGGGGGATGATCAATTATATAATGTTATTGTTACAGCTCATGCATTTGTTATAATTTTTTTTATA
GTAATACCTATTTTGATTGGGGGGTTTGGGAATTGGTTAGTTCCTCTTATGTTAGGGGCACCGGATATAGCTTTTCCTCG
TATAAACAATTTAAGTTTTTGATTATTACCTCCTTCCTTATTTTTGTTATTTATTTCTAGAATAGATGAGATAGGAGTTG
GGGCAGGATGGACTGTGTATCCGCCGTTAGCATCTTTAGATGGGCATCCGGGTAGATCAGTTGATTTTGCAATTTTTTCT
TTACATCTAGCTGGAGCATCTTCAATTATAGGGGCTATTAATTTTATTTCTACTATTTTAAACATACGGGGGTATGGGAT
ATCTATAGATAGGGTTCCTTTATTTGTTTGGTCTGTCTTAATTACTGCTATTTTATTACTTTTGTCTTTACCAGTATTAG
CGGGGGCGATTACGATACTTTTAACAGATCGTAATTTTAATACTTCATTTTTTGACCCTTCTGGAGGAGGGGATCCTGTT
CTATTTCAACACTTATTT
>SPIRU2365-12|Araneae|COI-5P
AAGTTTATATTTTATTTTTGGAGCTTGAGCTGCGATAGTGGGAACAGCAATAAGAGTATTAATTCGAATTGAATTAGGAC
AAATTGGAAGATTATTAGGGGATGATCAGTTATATAACGTTATTGTAACGGCCCATGCTTTTGTTATAATTTTCTTTATA
GTTATACCTATTTTAATTGGAGGATTTGGCAATTGATTAATCCCTTTAATATTAGGGGCTCCTGATATAGCTTTTCCTCG
GATAAATAATTTGAGATTTTGATTACTACCCCCTTCTTTATTACTTTTATTTATTTCTAGTATGGATGAAATGGGGGTTG
GAGCAGGATGAACTATTTATCCTCCCCTTGCTTCTTTGGAGGGTCATTCTGGTAGTTCTGTTGATTTTGCTATTTTTTCT
TTGCATTTGGCTGGGGCATCTTCAATTATAGGGGCTATTAATTTTATTTCCACTATTTTAAATATACGAGGGTATGGCAT
GACTATAGAGAAAGTTCCTTTATTTGTTTGATCTGTTTTAATTACAGCTGTGTTATTATTGTTATCTTTACCTGTTTTGG
CCGGAGCTATTACTATGCTTTTAACTGATCGAAATTTTAATACATCATTTTTTGATCCTTCTGGGGGAGGAGATCCGGTT
TTGTTCCAACATTTATTT
>MYMCA268-11|Mycobatesperates|COI-5P|JX834169
AACTCTATATTTCATTTTCGGAGCTTGGGCAGGAATCTTAGGATCCGCGCTAAGAGGGTTAATTCGGCTGGAATTAGGAC
AACCTGGATCCTTATTAGAAAATGACCAAATTTATAACACTATTGTAACAGCTCACGCTTTTGTCATAATTTTCTTTATG
GTGATACCTGTTATAATTGGGGGTTTTGGCAATTGGTTAGTCCCTCTTATGATCGGGGCCCAGGACATAGCCTTTCCTCG
CATAAACAACATAAGATTTTGGCTCCTGCCTCCTTCTTTAGCGTTGCTTGCTTCGTCTTCTTTTGCAGGGATGGGAGCTG
GGACAGGGTGGACGGTTTACCCCCCCTTAGCAAGAAACATTTTTCATTCAGGGTTTTCAGTGGACCTAGCCATTTTCAGT
CTTCACTTGGCTGGGGCCTCTTCAATTCTTGGGGCTATTAACTTTATTACAACAATTTTGAACATGCGTTCTTCCTCTGT
GTCCTTAGATAGAATTCCTCTATTTGTGTGGTCCGTATTGATCACTGCGGTTCTGTTATTGTTATCCTTACCTGTCCTAG
CGGGAGCTATCACCATACTGCTAACAGACCGTAACTTCAACACTTCCTTTTTTGACCCGTCAGGAGGAGGGGACCCAATT
CTTTACCAACATTTATTT
>AMSCO177-12|Scorpiones|COI-5P
AACTATATATTTGATTTTAGGTGGTTGAGCTTCAATGGTTGGTACTGCGTTAAGACTAATGATCCGGGCTGAAATTGGAA
GCCCAGGATCATTTATTGGGGATGATCAGATTTATAATGTTGTAGTTACTGCTCATGCATTTGTCATGATTTTTTTTATG
GTTATGCCTATTATAATTGGAGGTTTTGGAAATTGATTGGTTCCCTTGATGTTGGGAGCTCCTGATATGGCTTTTCCTCG
TTTAAATAATATAAGATTTTGATTATTACCACCTGCTTTTTTTCTTTTATTAGGATCAGCTTCATTGGAAAGAGGGGCAG
GTACTGGGTGGACAGTGTACCCTCCTCTTTCCTCATATATGTTTCATTCTGGGGGTTCTGTAGATATAACTATTTTTTCT
TTACATTTGGCTGGTATTTCTTCAATTTTAGGAGCTATTAATTTTATTACTACTATCTTAAATATACGAATGAGTGGAAT
GTTATTAGAGCGTATTCCTTTATTTGTATGGTCTGTAAAAATTACTGCTGTTTTATTACTTCTTTCTCTTCCTGTTCTTG
CTGGGGCTATTACTATATTATTGACTGATCGAAATTTTAACACTTCTTTTTTTGATCCTGCTGGTGGAGGGGATCCAATT
TTGTACCAA
>PSEUA089-10|Pseudoscorpiones|COI-5P
AACTATATATTTAATTTTGGGGGTGTGATCTGGATGTTTAGGTTTAAGATTAAGAATAATTATTCGAAGAGAATTATCTC
AAGCTGGAGGAATTATTGGAAGAGATCAAATTTTTAATGTTATAGTAACAGCTCATGCTTTTATTATAATTTTTTTTATA
GTTATACCTATAATAATTGGAGGTTTTGGTAATTGATTAGTACCTATAATAATTGGAGCTCCAGATATAGCATTTCCACG
AATAAATAATATAAGTTTTTGATTACTTCCTCCTTCTCTATTATTATTAATATTATCTTCATTAATTGAAATAGGATGTG
GTACAGGATGAACTATATATCCACCATTAGCTAATAATTTTTCTCATAATGGAAGAGCAGTGGATTTAGCTATTTTTTCC
TTACATTTAGCAGGTGCATCTTCAATTTTAGGAGCAGTAAATTTTATTAGTACTATTTTAAACATACGTTCAAACAATTT
TTCTTTGAGAAAAACTCCTTTATTTGTTTGATCAATTTTAATTACAACTGTTTTATTATTATTAGCTTTACCAGTTTTAG
CTGGTGCTATTACTATACTTTTAACAGATCGAAATTTTAATACATCTTTTTTTGATCCTGTAGGAGGAGGAGATCCTATT
TTATTTCAACATTTATTT
>HVDBS365-11|Araneae|COI-5P
GACATTATATTTAGTTTTTGGGGCTTGAGCTGCTATAGTGGGAACAGCAATAAGAGTGTTAATTCGAATTGAATTGGGAC
AGCCAGGAAGGTTTATAGGAGATGATCAGTTGTATAATGTAATTGTAACTGCTCATGCTTTTGTAATAATTTTTTTTATG
GTAATGCCAATTTTAATTGGGGGGTTCGGAAATTGATTAGTCCCCTTGATATTAGGCGCCCCTGATATAGCTTTTCCTCG
GATAAATAATTTAAGATTTTGATTATTACCACCGTCTTTATTTCTTTTAATTATTTCGTCAATAGTAGAAATAGGGGTAG
GAGCTGGATGAACGGTGTACCCTCCTCTAGCTAGACTAGAAGGACATGCTGGAAGATCAGTAGATTTTGCAATCTTTTCA
TTACATTTAGCAGGGGCTTCCTCAATCATAGGAGCTATTAATTTTATTTCTACCATTCTTAACATACGATTTTACGGAAT
AACGATAGAAAAAGTTCCTTTATTTGTTTGGTCTGTGCTTATTACAGCTGTTCTTCTTTTACTATCATTGCCAGTTTTAG
CAGGGGCTATCACAATATTATTAACTGATCGAAATTTTAACACTTCTTTTTTTGATCCTTCTGGGGGGGGTGATCCAATT
TTATTTCAACATTTATTT
>SPIRU997-11|Kaestneriapullata|COI-5P|KF368179
GACTTTATATTTAATTTTTGGAGCTTGATCAGCTATGGTTGGAACTGCAATAAGAGTTTTAATTCGAATTGAGTTAGGGC
AAACAGGAAGTATATTAGGGGATGATCAACTTTATAATGTGATTGTAACTGCTCATGCTTTTGTTATAATTTTTTTTATG
GTAATACCTATTTTAATTGGGGGGTTTGGAAATTGATTAGTTCCTTTAATATTAGGGGCCCCTGATATAGCTTTTCCTCG
TATAAATAATTTGAGATTTTGATTACTTCCCCCTTCCTTATTAATATTATTTATTTCTTCTATAGTAGAAATAGGTGTTG
GTGCAGGATGAACTATTTATCCTCCTTTAGCTTCTTTAGAAGGACATTCCGGAACTTCTGTAGATTTTGCTATCTTTTCT
TTACATTTAGCTGGGGCTTCTTCTATTATAGGGGCTATTAATTTTATTTCTACTATTATTAATATACGTTCTTATGATAT
AAGAATAGAAAAAATTTCTTTATTTGTTTGGTCTGTATTAATTACAGCTGTATTATTACTTTTATCTTTACCAGTTTTAG
CGGGGGCTATTACAATATTATTAACTGATCGTAATTTTAATACTTCTTTTTTTGACCCTGCAGGAGGGGGGGATCCTATT
TTGTTTCAACATTTATTT
>GACAC150-12|Dermanyssusapodis|COI-5P|FN432397
TTCTTATTTCACAGAAGAATAAGAGTTGATTTAATTATTTTTAGGCTACATTTAGCAGGAATTTCTTCTATTTTAGGAGC
AATCAATTTTATTACTACAATTATTAATATACGACCTAAATTTATATCTTTAGAAATAATAACATTATTTATATGATCTA
TTCTTATTACTGCTATTTTATTACTTTTATCTTTACCTGTTCTTGCAGGTGCAATTACAATATTATTATTTGATCGGAAT
TTTAATACAACATTTTTTGATCCATCTGGAGGAGGAGATCCTATTCTGTACCAACATCTATTTTGATTCTTTGGACACCC
AGAAGTATATATTTTAATTATTCCAGGATTTGGAATAATTTCTCACATCGTTTGTTACCAAACGGGAAAAAAAAAACCAT
TTGGAAATATTAGAATAATCTATGCTATAATAACAATCGGAATTTTAGGATTTATTGTTTGAGCACATCACATATTTACA
GTAGGACTAGATATTGATACTCGAGCCTATTTCACTTCTGCTACCATAATTATTGCAATTCCA
>MIONT358-09|Sarcoptiformes|COI-5P|GU657367
AACTTTATACTTTATTTTTGGTGCCTGAGCAGGGATACTAGGATCTTCCCTAAGGGCTATTATTCGATTAGAGTTAGGAC
AACCAGGATCCTTATTAGAAAATGATCAAATTTATAATACCATCGTTACTGCCCACGCATTTGTTATGATTTTCTTCATG
GTAATACCTGTAATAATTGGAGGGTTTGGTAATTGGCTCGTACCATTAATAATCGGAGCCCAAGACATGGCTTTTCCACG
AATGAATAATATGAGATTCTGACTCCTACCACCTTCTCTAACCTTTCTAACCGCATCAGGATTTGCCGGTATGGGAGCAG
GAACAGGCTGGACCGTTTACCCTCCTCTAGCAGGAAACTTATTTCACTCTGGAATTTCTGTAGATTTAGCAATCTTTAGA
TTACACTTAGCAGGTGCGTCTTCTATTCTAGGAGCAATTAATTTTATCACTACCATCATAAATATACGATCTTCGACAAG
AAGCTTGGACTCTATTCCTTTATTTGTATGATCAGTCTTAATCACTGCAGTACTACTCCTCCTTTCACTACCCGTCCTAG
CTGGAGCTATCACCATGTTACTAACCGATCGTAATTTTAACACTTCATTCTTCGACCCGACGGGAGGTGGAGACCCAATT
TTATATCAACATCTATTT
>ARONT133-09|Steatodatriangulosa|COI-5P|GU682609
TTCTTTATATTTAATTTTTGGAGCTTGATCAGCTATAATTGGAACAGGTATGAGTGTCTTAATTCGGGTAGAATTAGGAC
AATCTGGAAGATTGTTAGGTGATGATCAATTATATAATGTAATTGTTACTGGACACGCTTTTGTAATAATTTTTTTTATA
GTAATACCAGTATTAATTGGTGGATTTGGAAATTGGTTGGTTCCATTAATATTAGGGGCTCCTGATATAGCTTTTCCTCG
AATAAATAATTTAAGATTTTGATTATTACCTCCTTCTTTATTATTATTATTAATTTCTTCTATAGAAGAAATAGGTGTTG
GAGCTGGATGAACTATTTACCCCCCTTTATCTTCTCTGGAAGGTCATAGAGGAAGATCTGTAGATTTTGCTATTTTTTCT
TTACATTTGGCTGGTGCTTCTTCCATTATAGGTGCTATTAATTTTATTTCTACTATTTTAAATATACGTTTATTTGGGAT
GAGAATAGAAAAAGTTAGACTTTTTGTTTGGTCAGTATTAATCACTGCAGTATTATTATTATTATCTTTACCTGTATTGG
CAGGTGCTATTACTATATTATTAACAGATCGAAATTTTAATACTTCTTTTTTTGACCCGGCTGGGGGAGGTGATCCAATT
TTATTTCAACATTTGTTT
>CHACB1001-10|Penthaleidae|COI-5P|HM907139
AACTTTATATTTTATATTTGGATTATGAGCAGCACTCCTAGGATCTTCAATAAGAATCCTAATTCGAATAAAATTAGGAA
TACCATCTTCAATAGAAATAAATGATCAAACATATAATGTAATAGTTACTTCTCATGCATTTGTAATAATTTTTTTTATA
GTTATACCAGTAATAATTGGAGGTTTTGGAAATTGACTAGTTCCAATAATAATTAGAGCTCCAGATATAGCATTTCCACG
AATAAATAATATAAGATTTTGACTTCTACCCCCTTCACTTCTATTTTTATTAATATCTGCTATTACAGAATACGGAAGAG
GAACAGGATGAACAGTATACCCCCCACTATCAAATCAACTATTCCATAGAGGAACCTCAGTAGATTTAACTATTTTTTCA
CTTCACATAGCTGGAATCTCTTCAATTTTAGGGGCTATTAATTTTATTACAACAATCTTAAATATACGACCATATATAAT
ATCATTTGAACGAATCCCCTTATTTGTATGATCAGTGATAATCACAGCAATTCTTCTTCTTCTTTCATTACCAGTATTAG
CAGGAGCAATTACAATACTACTAACAGATCGAAATTTTAATACTTCCTTTTTTGATCCAGCTGGAGGAGGAGATCCTATT
CTATATCAACATCTTTTT
>BBUSE2254-12|Araneae|COI-5P
AACATTATATTTAATTTTTGGAGCATGAGCTGCTATAGTAGGAACAGCGATAAGAGTATTAATTCGAATAGAATTAGGAC
AGTTAGGAAGATTTTTAGGAAATGATCATATATATAATGTTATTGTTACTGCTCATGCATTTGTTATAATTTTTTTTATA
GTTATACCTATTTTAATTGGGGGATTTGGGAATTGACTGGTACCATTAATATTAGGAGCTCCTGATATAGCATTTCCTCG
AATAAATAATTTGAGATTTTGATTATTACCACCTTCTTTATTATTATTATTTATTTCTTCGTTATCTGAAATAGGAGTTG
GGGCAGGGTGGACTGTTTATCCTCCATTAGCTTCTGTAGTGGGTCATAATGGAAGTTCTGTTGATTTTGCTATTTTTTCT
TTACATTTAGCTGGTGCTTCTTCTATTATAGGAGCTATTAATTTTATTTCTACTGTAATTAACATGCGTTCTGTAGGAAT
AAGAATAGAAAAGGTTCCTTTATTTGTCTGATCTGTAGTAATTACTGCTGTTTTATTATTATTATCTCTTCCTGTTTTAG
CGGGAGCTATTACTATGTTGTTAACTGATCGAAATTTTAATACTTCGTTTTTTGATCCTGCTGGTGGAGGGGATCCTATT
TTATTTCAACATTTGTTT
>CHEFI1100-12|Araneae|COI-5P
TTCTTTATATTTTATTTTTGGGGCATGAGCTGCTATGGTGGGTACTGCTATAAGAGTGTTGATTCGAATTGAGTTAGGTC
AGACTGGAAGAATATTAGGGGATGATCAGCTTTATAATGTTATTGTTACGGCCCATGCTTTTGTAATAATTTTTTTTATA
GTTATACCAATTTTAATTGGGGGATTTGGTAATTGGTTGGTACCGCTTATGTTAGGTGCTCCTGATATAGCTTTTCCTCG
AATAAACAACTTGAGATTTTGATTACTTCCTCCTTCTTTATTACTTCTTTTCATTTCAAGTATAGTTGAAATAGGGGTTG
GGTCTGGATGGACTGTTTATCCCCCCCTTGCTTCTTTAGAAGGACATGCTGGAAGTTCTGTGGATTTTGCTATTTTTTCT
CTTCATTTAGCAGGAGCTTCTTCTATTATAGGGGCTATTAATTTTATTTCTACTATTATTAATATACGGGGGTATGGTGT
ATCTATAGAAAAAGTTCCACTTTTTGTTTGATCTGTATTAATTACTGCCGTTTTATTACTTTTGTCACTCCCTGTTTTAG
CAGGAGCGATTACAATACTGTTAACAGATCGAAATTTTAATACTTCTTTTTTTGATCCTGCTGGTGGAGGAGATCCCGTT
TTATTTCAACATTTATTT
>SPIAI751-10|Araneae|COI-5P|HM384654
GAGTTTATATTTTGTTTTTGGGGCTTGAGCTGCTATAGTAGGTACTGCTATAAGAGTATTAATTCGAATTGAATTAGGAC
AAGTAGGAAGTTTGTTAGGGGATGATCAGTTGTATAATGTGATTGTTACTGCGCATGCTTTTGTTATAATTTTTTTTATG
GTTATGCCTATTTTAATTGGAGGGTTTGGAAATTGGTTAGTTCCATTAATATTAGGTGCTCCTGATATAGCATTTCCTCG
TATAAATAATTTAAGTTTTTGATTATTACCACCATCATTATTATTATTATTTATTTCTAGAATGGATGAGATAGGAGTGG
GCGCAGGTTGAACTATTTATCCTCCTCTAGCTTCTTTGGAGGGGCATTCTGGTAGATCTGTAGATTTTGCTATTTTTTCT
TTACATTTAGCAGGGGCATCTTCTATTATGGGGGCTATTAATTTTATTTCTACTATTTTTAATATGCGAGGTTATGGTAT
ATCTATAGAAAAGGTTCCATTATTTGTTTGGTCTGTTTTAATTACGGCTATTTTATTACTTTTATCTTTACCAGTTCTAG
CGGGGGCTATTACAATACTTTTAACAGATCGAAATTTTAATACGTCTTTTTTCGATCCTTCAGGGGGAGGGGATCCTATT
TTATTTCAACATTTATTT
>SPRMA096-10|Araneae|COI-5P|HQ580737
GACTCTTTATTTTATATTTGGTGCTTGGGCCGCTATGGTTGGAACGTCTATAAGTGTTTTAATTCGAATTGAGTTAGGGC
AATCAGGAAGATTTTTGGGTGATGATCATTTATATAATGTTATTGTAACTGCTCATGCTTTTGTTATAATTTTTTTTATA
GTTATACCTGTTCTAATTGGTGGATTTGGAAATTGGTTAGTTCCTTTAATATTAGGGGCTCCTGATATAGCTTTCCCTCG
AATAAATAATTTGAGATTTTGGTTGTTGCCTCCTTCGTTATTTTTATTATTTATTTCTTCTATAGTTGAAATAGGGGTGG
GAGCTGGATGAACAATTTATCCTCCTTTAGCGTCAAGAATAGGGCATGCAGGGAGATCTGTTGATTTTGCTATTTTTTCT
TTGCATTTAGCTGGGGCTTCTTCAATTATAGGGGCTATTAATTTTATTTCTACTATTTTTAACATGCGAGCTATAGGAAT
AAGAATGGAAAAGGTTCCTTTATTTGTATGATCTATTCTTATCACTGTGATTTTATTATTGTTATCTTTGCCTGTTTTAG
CTGGGGCTATTACTATATTGTTAACTGATCGAAACTTTAATACTTCTTTTTTTGATCCTGCTGGGGGAGGGGATCCTATT
TTATTTCAACATTTATTT
>SSWLF3056-13|Eremaeidae|COI-5P
AACTTTATATTTTATCTTTGGCGCTTGAGCTGGCTTATTGGGTTCTGCTTTAAGAGCTTTAATTCGTTTAGAATTAGGTC
AACCAGGATCTTTAATAGAAAACGATCAAATTTATAATACTATTGTTACTGCTCACGCTTTTGTCATAATTTTTTTCATG
GTAATACCTGTAATAATTGGAGGATTTGGAAATTGACTAGTTCCTATAATAATCGGAGCACAAGATATAGCTTTTCCTCG
AATAAATAATATAAGATTTTGATTACTTCCACCATCCTTATCCTTACTATCCGCATCTGCCTTTGCTGGAATAGGAGCAG
GAACTGGATGAACAGTTTACCCTCCTTTAGCTGGTAATTTATTTCATTCTGGTTTTTCAGTTGACCTAGCAATTTTTAGT
CTTCATTTAGCCGGGGCCTCTTCCATTTTAGGTGCTATTAATTTTATCACTACTATTATAAACATACGTTCTTCTTCTAT
AACACTAGACTCAATTCCATTATTTGTTTGATCTGTTTTAATTACGGCAATTTTATTACTTTTGTCTTTACCAGTGTTAG
CAGGTGCAATTACTATATTATTAACAGACCGT
>SPICR589-11|Araneae|COI-5P
AACTTTATATTTAGTGTTTGGAGCTTGAGCTGCTATGGTAGGGACTGCTATGAGAGTATTAATTCGTGTAGAACTAGGAC
AGCCTGGAAGATTGTTAGGTGATGATCAATTGTATAACGTGATTGTAACTGGGCATGCATTTGTTATAATTTTTTTTATG
GTTATACCTATTTTGATTGGTGGGTTTGGGAATTGATTAGTTCCTTTAATATTAGGAGCTCCTGATATAGCTTTTCCTCG
AATGAATAATTTGAGATTTTGATTACTTCCTCCTTCTTTGATATTATTATTCATTTCTTCAATAGAAGAAATGGGGGTGG
GTGCTGGATGAACTATTTATCCTCCTTTATCTTCTCTTGAAGGTCATGGGGGTAGATCAGTAGATTTTGCAATTTTTTCT
TTGCATTTAGCTGGGGCTTCTTCAATTATAGGGGCTATTAATTTTATTTCTACAATTCTTAATATGCGGTTATACGGAAT
AACTATAGAAAAGGTAAGATTGTTTGTATGATCTGTATTAATTACTGCTGTATTATTATTATTGTCTCTTCCTGTTTTAG
CAGGAGCTATCACTATATTGTTAACTGATCGAAATTTTAATACTTCTTTTTTCGACCCTGCTGGAGGTGGAGATCCTATT
TTATTTCAACACTTGTTT
>SPICR691-11|Araneae|COI-5P
TACTTTATATTTGGTTTTTGGTGCTTGGGCTGCTATAGTAGGAACAGCTATGAGAGTATTGATTCGAATTGAGTTGGGGC
AGCCGGGGAGGTTTATTGGGGATGACCAGTTGTATAATGTAATTGTTACAGCTCATGCTTTTGTAATAATTTTTTTTATG
GTGATGCCAATTTTAATTGGGGGGTTTGGGAATTGGTTAGTTCCCTTGATGTTAGGAGCTCCAGATATGGCATTTCCCCG
AATAAATAATTTGAGTTTTTGATTGCTTCCCCCTTCTTTGTTTTTGTTGATCATTTCATCTATAGTCGAAATAGGGGTTG
GGGCAGGATGAACTGTTTATCCTCCTCTTGCAAGATTAGAAGGGCATGCCGGGAGTTCTGTTGATTTTGCAATTTTTTCT
CTGCATTTGGCAGGGGCTTCTTCTATTATAGGGGCTATTAACTTTATTAGAACAATCATTAATATGCGATTTTATGGGAT
AACTATGGAGAAAGTGCCATTGTTTGTTTGGTCTGTTTTAATTACAGCGGTTTTATTGTTGTTGTCTTTGCCAGTTTTAG
CGGGGGCTATTACGATGCTTTTAACAGATCGAAATTTTAATACTTCTTTCTTTGACCCTTCAGGAGGGGGGGATCCTATT
TTGTTCCAACATTTGTTC
>BBUSE1980-12|Araneae|COI-5P
AAGTTTATATTTTTTGTTTGGAGTATGATCAGCTATAGTAGGAACAGCAATAAGAGTTTTAATCCGAATTGAGTTAGGGC
AATCTGGGTCATTTTTAGGAGATGATCAATTGTATAATGTTATTGTGACTGCTCATGCTTTTGTAATAATTTTTTTTATA
GTTATACCTATTTTAATTGGGGGATTTGGTAATTGGTTAGTACCTTTAATATTAGGGGCTCCTGATATAGCTTTTCCACG
AATAAATAATTTAAGATTTTGATTATTACCACCTTCTCTTTTTATATTGTTTATTTCTTCAATAGTTGATGTAGGGGTAG
GAGCTGGGTGGACTGTGTACCCCCCTCTCGCATCCTTAGATGGTCATCCTGGAAGATCAGTGGATTTTGCAATTTTTTCT
CTTCATTTAGCAGGTGCTTCTTCTATTATAGGGGCTATTAATTTTATTTCCACAATTATTAATATACGAATAAGAGGGGT
TTCTATAGAGAAAGTTCCTCTTTTTGTTTGGTCGGTGTTAATTACTGCTGTATTATTGCTTTTGTCTTTACCTGTTTTAG
CAGGAGCTATCACTATATTACTTACAGATCGAAATTTTAATACATCTTTTTTTGACCCCTCTGGAGGAGGTGACCCTGTA
TTATTTCAACATTTGTTT
>AAPY090-10|Araneae|COI-5P
AACATTATATTTAGTATTTGGGGCCTGATCAGCAATGGTTGGGACTGCTATAAGAGTTTTAATTCGAATTGAATTAGGTC
AACCTGGTAGATTTATTGGGGATGATCAATTATATAATGTAATTGTAACTGCCCATGCTTTTGTAATAATTTTTTTTATA
GTTATGCCTATTTTAATTGGAGGTTTTGGAAATTGATTAGTTCCTTTAATGTTAGGAGCTCCAGATATGGCTTTTCCACG
TATAAATAATTTGAGATTTTGACTATTACCTCCTTCATTATTTTTATTAATTATTTCTTCTATAGTTGAAATAGGAGTAG
GTGCTGGATGAACTGTTTATCCTCCTTTAGCTGGGTTAGAAGGACATGCAGGAAGGTCAGTAGATTTTGCTATTTTTTCA
TTGCATTTAGCTGGTGCTTCTTCTATTATAGGAGCAATTAATTTTATTTCAACAATTATTAATATACGATTTTATGGAAT
AACTATAGAAAAGGTCCCATTATTTGTTTGATCCGTTTTGATTACTGCTGTATTATTATTATTATCTCTTCCTGTATTAG
CAGGAGCAATTACAATATTATTAACTGATCGAAATTTTAATACATCTTTTTTTGATCCTTCAGGAGGAGGAGATCCTATT
TTATTTCAACATTTATTT
>SPIEU448-10|Araneae|COI-5P|HQ975171
GACTTTGTATTTGTTGTTTGGAGCTTGAGCTGCTATAGTGGGAACGGCTATAAGAGTACTGATTCGAATTGAATTAGGGC
AACCTGGAAGATTTTTAGGGGATGATCATTTATATAACGTTATAGTAACTGCTCATGCTTTTGTGATGATTTTTTTTATG
GTTATACCGATTTTAATTGGAGGGTTTGGAAATTGGTTAGTGCCTTTGATATTAGGGGCTCCTGATATGGCTTTTCCTCG
AATAAATAATTTAAGATTTTGATTGTTACCTCCTTCTTTATTGTTGTTGTTTATTTCTTCTATGGTGGAAGTTGGAGTGG
GGGCTGGATGAACGGTTTATCCTCCTTTAGCTTCTACAGTGGGACATGCTGGAAGTTCTGTGGATTTTGCGATTTTTTCT
TTACATTTAGCAGGGGCTTCTTCTATTATAGGGGCTATTAATTTTATTTCAACTATTATTAATATGCGAGCGGAAGGAAT
GAGAATGGAAAAAGTCCCTTTGTTTGTGTGGTCTGTTTTAATTACGGCTGTCTTGTTGTTATTATCTCTTCCTGTATTGG
CGGGGGCTATTACTATATTGTTGACTGATCGAAATTTTAATACGTCCTTTTTTGACCCGGCGGGTGGAGGTGATCCTATT
TTATTTCAACATTTGTTT
>SPIRU1047-11|Baryphymatrifrons|COI-5P|KF367913
TAGTTTATATTTTATTTTTGGGGCTTGGGCTGCTATAGTAGGTACAGCAATAAGAGTGTTAATTCGAATTGAGTTAGGAC
AGACTGGTAGTTTATTAGGGGATGATCAGTTGTATAATGTTATCGTTACTGCTCATGCTTTTGTTATAATTTTTTTTATA
GTTATACCTATTTTAATTGGGGGGTTTGGTAACTGGTTAGTTCCTCTGATGTTAGGAGCACCTGACATAGCTTTCCCTCG
CATGAATAATTTAAGTTTTTGGTTGTTGCCTCCTTCTTTGTTATTATTATTTATTTCTAGAATGGATGAGATAGGTGTGG
GAGCGGGATGGACTGTGTATCCGCCTCTTGCTTCTTTAGAAGGGCATTCTGGGAGATCAGTGGATTTTGCTATTTTTTCT
TTACACCTAGCTGGGGCTTCTTCGATTATGGGGGCTATCAATTTTATTTCGACCATTTTAAATATGCGCGGGTATGGAAT
AACCATGGATAGGGTTCCTCTTTTTGTTTGGTCAGTTTTAATTACAGCTGTATTGTTACTTTTATCTTTACCTGTGTTAG
CAGGGGCCATTACAATACTTTTAACGGATCGTAATTTTAATACGTCATTTTTTGACCCTGCGGGGGGGGGAGATCCTATT
TTATTTCAACATTTATTT
>SPICA263-10|Araneae|COI-5P|JF885468
ATCCTTATATTTTATTTTTGGGGCTTGAGCTGCTATAGTTGGTACTGCTATAAGAGTTTTGATTCGAATTGAGTTGGGGC
AGGTAGGAAGAATATTGGGGGATGATCAATTATATAATGTGATTGTAACAGCACATGCTTTTGTAATAATTTTTTTTATG
GTTATACCTATTTTAATTGGAGGATTTGGAAATTGGTTAGTTCCTTTAATGTTAGGGGCTCCTGATATGGCTTTCCCTCG
AATAAATAATTTGAGATTTTGATTATTACCTCCTTCATTATTTTTGTTATTTATTTCTTCTATAGTAGAGATAGGGGTAG
GGGCAGGGTGAACAGTTTATCCCCCTCTTTCTTCTTTAGATGGGCATCCTGGAAGTTCTGTAGATTTTGCTATTTTTTCT
CTTCACTTAGCTGGGGCTTCTTCTATTATGGGGGCAATTAATTTTATTTCGACCATTTTAAATATACGAGCTTATGGGAT
ATCTATAGAAAAGGTATCTTTGTTTGTCTGGTCTGTTCTAATTACTGCTGTCCTTTTATTATTATCTTTACCTGTGTTGG
CGGGGGCTATTACTATATTGTTAACTGATCGCAATTTTAATACTTCTTTTTTCGACCCTGCAGGGGGAGGAGACCCTATT
TTATTTCAACATTTATTT
>MYMCE256-12|Cyta|COI-5P|JX835182
AACAATATATTTCTTATTTGGAGCTTGAGCCTCTTTATTAGGTGCTTCAATAAGAATTCTAATTCGATTAGAACTTTCTC
AACCAGGTTCTATAATAGGAAATGATCAAATCTACAATACAATTGTAACAGCCCATGCCTTTGTAATAATTTTTTTTATA
GTTATGCCAATCATAATCGGTGGATTTGGAAACTGATTAATCCCCCTGATAATTGGATCCCCTGATATAGCATTTCCACG
AATAAATAATATAAGATTTTGACTTCTTCCTCCCTCTCTATCCCTACTTCTAATATCCTCAATATCCAATAGAGGTGCTG
GGACAGGATGAACGGTTTATCCTCCACTATCTAGAGGCCTTTCTCACCCAGGAGCATCTGTCGATTTAACCATTTTCTCA
CTTCATTTAGCAGGAGCTTCTTCCATCCTAGGAGCCATCAACTTTATATCAACAATTATTAATATACGAAACCCTAACAT
ATCCTTCGAACGAATTCCGCTATTTGTATGATCTGTATTTATTACCGTTCTATTACTTCTACTATCTCTTCCTGTACTAG
CAGGAGCCATTACAATACTCTTAACAGATCGAAACTTCAACACCTCTTTTTTTGACCCAATAGGAGGAGGAGACCCAATT
TTATATCAACACCTATTT
>ARBCM463-13|Araneae|COI-5P
TTCTTTGTATTTTATTTTTGGGGCATGAGCTGCTATAGTGGGTACTGCTATAAGAGTATTAATTCGAATTGAGTTAGGTC
AAATTGGGAGAATGTTAGGGGATGATCAATTGTATAATGTAATTGTTACTGCGCATGCTTTTGTTATAATTTTTTTTATG
GTTATACCTATTTTAATTGGGGGATTTGGAAATTGGTTGGTACCTTTAATATTAGGAGCTCCAGACATAGCTTTTCCTCG
TATGAATAATCTTAGATTTTGATTGTTACCTCCTTCTTTATTGCTTTTGTTTGTTTCAAGAATAATTGAGATAGGAGTAG
GGGCAGGGTGAACTGTTTATCCTCCTCTTTCTTCTTTGGAGGGGCATTCGGGTAATGCTGTTGATTTTGCTATTTTTTCA
CTTCATTTAGCTGGAGCCTCTTCTATTATAGGGGCTATTAATTTTATTTCCACAATTATTAACATACGTGGGTATGGTGT
TTCTATGGAGAAAGTACCACTTTTTGTGTGGTCTGTGTTAATTACAGCTATTTTATTGTTGTTATCTCTTCCGGTTTTGG
CAGGGGCAATTACAATATTATTAACAGATCGTAATTTTAATACGTCTTTTTTCGATCCTGCTGGAGGAGGGGATCCGGTG
TTGTTTCAACACTTGTTT
>BBUSE1929-12|Araneae|COI-5P
GACATTATATTTGATTTTTGGAGCTTGGGCTGCTATAGTTGGGACTGCTATAAGAGTTTTGATTCGGGTCGAGCTTGGGC
AACCTGGAAGGTTTATTGGGGATGATCAATTATATAATGTTATTGTTACTGCACATGCTTTTGTAATAATTTTCTTTATA
GTAATACCTATTCTTATTGGTGGTTTTGGGAATTGGTTAGTACCTTTAATATTAGGGGCCCCTGATATAGCGTTTCCTCG
AATAAATAATTTAAGATTTTGGTTACTCCCCCCTTCTTTATTTTTATTAATCATTTCTTCTATAGTGGAAATAGGTGTAG
GTGCGGGATGAACAGTGTATCCTCCTTTATCAAGACTTGATGGACATGCCGGGAGATCTATAGATTTTGCTATTTTTTCT
CTTCATTTAGCTGGGGCCTCTTCTATTATAGGGGCAATTAATTTTATTTCTACTATTATTAATATACGATTTTATGGAAT
AACTATGGAGAAAGTTCCTCTTTTTGTGTGGTCTGTTTTAATTACAGCAGTTTTATTATTATTATCTTTACCTGTTCTTG
CAGGGGCTATTACTATATTATTAACTGATCGAAATTTTAATACTTCTTTTTTCGACCCTTCAGGAGGAGGTGATCCTATT
CTTTTTCAGCATTTGTTT
>CNROB862-13|Arachnida|COI-5P
AACTTTATATTTAATTTTTTCTTTTTGATCTGCTTTAATTGGATCAGCTATAAGAATAATTATTCGTATTGAGTTAAGGC
AACCAGGAGCATTTTTAAAAAATGATCAAATTTATAATACAATTGTCACAGCTCATGCTTTTGTTATAATTTTTTTTATA
GTTATACCTGCAATAATTGGTGGTTTTGGTAATTGATTAACTCCATTATTAATTAATAGACCTGATATAGTTTTTCCTCG
TATAAATAATATAAGATTTTGATTATTACCTCCTAGACTAATTATATTAATTACCAGTTCAATAATAGAAATAGGAGTCG
GAACTGGATGAACAGTTTATCCTCCTTTATCAAATAATTTAAATCATAGTAGAGCAGCTGTTGATATCGCTATTTTTAGT
CTTCATATCGCAGGTATCTCTAGAATTTTAGGATCTATTAATTTTATTACTACAATTATAAATATACGTCCAAAAAGTAT
AACATATGAACGAATTCCTTTATTTGTTTGATCTGTTTTTATTACAACTATTCTTCTTCTTTTAAGATTACCTGTTTTAG
CAGGAGCTATCACAATACTTTTATTTGATCGAAATTTTAATACTTCTTTTTTTGATCCAAGAGGAGGAGGAGATCC
>MYMCF312-12|Tydeidae|COI-5P|JX837897
AACAATATATTTTGCTTTTGGGTTGTGAGCAGGATTATTAGGAGCATCTATAAGAATTATTATCCGATTAAAACTTTCTC
ACCCAAACATAATAGGACAAAATGATCAAATATTTAATGTGCTAGTAACAGCCCACGCTTTTGTTATAATTTTTTTTATA
GTAATACCCATTATAATTGGGGGATTCGGGAACTGATTAGTTCCAATAATAATAGGAGCCCCAGATATAGCTTTCCCTCG
TATAAATAACATAAGATTTTGATTACTACCCCCATCTCTTTCATTATTATTAATATCATCATTTACAGATATAGGAGCTG
GAACTGGTTGAACAGTCTACCCACCCCTATCAAGACAAATATTTCATAGAGGGGTATCTATTGATTTAACTATTTTTTCT
CTACATTTAGCAGGTGTATCTTCAATTTTAGGGGCCATCAATTTTATCACAACTATTTTAAATATACGATCAACTACCCT
TTCCTTTGAGCGAATTCCATTATTTATTTGATCTGTTTTCATCACAGCTATTTTACTGTTATTATCATTACCTGTATTAG
CCGGAGCCATTACAATACTATTAACCGATCGAAACTTTAATACATCTTTCTTTGACCCAGCCGGAGGTGGGGATCCCATT
CTCTATCAACATTTATTT
>RBINA2798-13|Mangoraplacida|COI-5P
ACTTTATACTTGATTTTTGGTGCTTGGGCGGCTATAGTGGGGACAGCTATAAGAGTATTGATTCGAATTGAGTTAGGACA
GCCTGGGAGCTTTATTGGAGATGATCAGTTATATAATGTAATTGTTACAGCTCATGCATTTGTAATGATTTTTTTTATAG
TGATACCGATTTTAATTGGGGGGTTTGGGAATTGATTAGTGCCTTTAATATTGGGGGCACCTGATATAGCGTTTCCTCGG
ATGAATAATTTGAGGTTTTGACTACTTCCCCCTTCTTTGTTTTTATTAGTTATTTCATCTATGGTGGAGATGGGGGTAGG
AACTGGTTGGACAGTTTACCCCCCTTTAGCAGGTTTAGAGGGTCATGCTGGGAGATCAGTGGATTTTGCAATTTTTTCTC
TTCATTTAGCAGGGGCGTCTTCAATTATAGGGGCTATTAATTTTATTAGAACAATTATTAACATGCGGTTTTATGGGATG
ACTATGGAGAAGGTTCCTCTGTTTGTGTGGTCTGTTTTGATTACGGCAGTTTTATTACTTTTGTCTTTACCTGTTTTAGC
GGGGGCTATTACTATATTACTTACTGAT
>SPIEU974-10|Araneae|COI-5P|HQ975524
AACGTTATATTTAGTTTTTGGAGCTTGGTCTGCTATAGCAGGGACTGCTATAAGTGTTTTAATTCGAGTAGAGTTGGGTC
TACCTGGTAGATTATTAGGAGATGACCAATTATATAATGTAATTGTTACAGGTCATGCTTTTGTTATAATTTTTTTTATA
GTTATACCAATTTTAATTGGAGGATTTGGTAATTGGTTGGTCCCTTTAATGTTAGGTGCTCCTGATATAGCTTTTCCTCG
TATAAATAATTTAAGTTTTTGGTTGTTGCCTCCTTCTTTAATATTACTATTCATTTCTTCTATAGAAGAAATGGGAGTTG
GGGCTGGGTGAACTATTTATCCTCCTTTATCTTCGTTGGAAGGTCATAGAAGTATATCTGTAGATTTTGCTATTTTTTCT
TTACATTTGGCAGGAGCATCTTCTATTATAGGTGCTATTAATTTTATTTCTACTATTTTTAATATACGATTAAATGGAAT
AACTATGGAAAAGGTAAGATTATTTGTATGATCAGTTTTAATTACTGCTGTATTGTTGTTATTATCATTACCTGTGTTAG
CTGGGGCTATTACTATGTTGTTGACGGATCGTAATTTTAATACTTCTTTTTTTGATCCTGCTGGAGGGGGAGATCCTATT
TTATTTCAACATTTATTT
>ASAAR164-12|Araneae|COI-5P
AACTTTATACTTATTATTTGGTTCATGATCAGCAATAGTTGGAACTGCTATAAGAGTAATTATTCGAATAGAATTGGGTC
AAGTTGGAAGATTATTAGGTGATGATCATTTATATAATGTGATTGTAACAGCACATGCATTTATTATAATTTTTTTTATA
GTTATACCTATTTTAATTGGTGGATTTGGTAATTGGTTGATTCCTTTAATATTAGGAGCTCCGGATATAGCATTTCCTCG
AATAAATAATTTAAGATTTTGATTATTACCTCCTTCATTAATTTTATTATTTGTTTCTTCTATAGCTGAAATAGGAGTTG
GAGCTGGGTGAACTGTATATCCTCCTTTAGCTTCTAGAATTGGACATTCTGGTAGTGCTATAGATTTTGCTATTTTTTCG
TTACATTTAGCTGGTGCTTCTTCAATTATAGGTTCTATTAATTTTATTTCTACGGTTATTAATATACGTTCTTATGGAAT
AAGAATAGAGAAAGTACCTTTATTTGTATGATCAGTTTTTATTACAACTATTTTATTATTATTATCTTTACCAGTTTTAG
CAGGAGCTATTACTATATTATTAACTGATCGTAATTTTAATACTTCTTTTTTTGATCCAGCTGGGGGAGGGGATCCAATT
TTGTTTCAACATTTATTT
>BBUSA1237-10|Araneae|COI-5P|HQ930924
TAGTTTATATTTTATTTTTGGTGCATGATCTGCTATAGTAGGGACAGCGATAAGAGTTTTAATTCGAATTGAATTAGGTC
AAACTGGTAGTTTATTAGGTGATGACCAATTATATAATGTTATTGTTACTGCTCATGCTTTTATTATAATTTTTTTTATA
GTAATACCTATTTTAATTGGAGGGTTTGGAAATTGGTTAGTACCATTAATGTTGGGTGCTCCTGATATAGCTTTTCCTCG
AATAAATAATTTAAGTTTTTGGTTATTACCCCCTTCTTTATTATTATTATTTATTTCTAGAATGGACGAAATAGGAGTAG
GAGCAGGTTGAACTATTTACCCTCCGTTGGCTTCATTAGAAGGGCATTCTGGTAGATCTGTTGATTTTGCTATTTTTTCT
CTTCATTTAGCTGGAGCTTCTTCTATTATAGGGGCTATTAATTTTATTTCTACAATTTTTAATATACGAGGATATGGTAT
AACTATAGAGAAGATTCCTTTATTTGTTTGGTCTGTATTAATCACAGCTGTTTTATTATTATTATCTCTTCCCGTTTTAG
CAGGAGCTATTACTATGTTGTTAACAGATCGTAATTTTAATACCTCTTTTTTTGATCCTGCGGGAGGGGGTGATCCAGTT
TTATTTCAACATTTATTC
>BBUSE029-11|Araneae|COI-5P
GACTTTATATTTAATTTTTGGAATTTGATCTGCTTTAGTAGGAACGGCTATAAGAGTTTTAATTCGTATTGAATTAGGAC
AGTTGGGTAGATTTTTTGGAGATGATCATTTATATAATGTAATTGTAACGGCTCATGCTTTTGTTATAATTTTTTTTATA
GTTATACCTATTATAATTGGAGGATTTGGTAATTGGTTAATTCCTTTAATATTAGGTGCCCCTGATATAGCTTTTCCTCG
TATAAATAATTTAAGATTTTGGTTACTTCCTCCTTCGTTAATATTATTATTTATTTCTTCTATAGTAGAAGTAGGAGTGG
GGGCAGGATGAACTATTTATCCTCCTTTAGCTGCTAGAATTGGACATTTTGGTAGATCTGTAGATTTTGCTATTTTTTCT
TTACATTTAGCTGGAGTTTCATCTATTATAGGGGCTATTAATTTTATTTCTACTATTATTAATATACGTTCTGAAGGAAT
AAGTATAGAAAAAATTTCTTTATTTGTTTGATCTATTTTTATTACTGTAATTTTGTTACTTTTATCTTTACCTGTATTAG
CTGGTGCTATTACTATATTATTAATAGATCGAAATTTTAATACTTCTTTTTTTGACCCTGCTGGGGGTGGAGATCCAATT
TTATTTCAACATTTATTT
>OWM019-13|Trombidiformes|COI-5P
CATAAAGATATTGGAACTTTATATTTTGCTTTTGGAGCATGATCAGGAATAATTGGAGCAAGCCTAAGAAGCTTAATCCG
CTTGGAATTAGGACAACCGGGAAGTTTAATATTCAACGACCAAATCTATAACACAATTGTAACAGCCCATGCCTTTATTA
TAATTTTCTTTATAGTAATACCAATAATAATTGGAGGATTCGGAAATTGATTACTACCTTTAATACTTAGAGCCCCCGAT
ATAGCATTTCCACGAATAAATAATATAAGATTCTGACTATTACCACCATCAATCACACTTCTTCTTTCTAGATCATTCAC
ATCAATAGGAGCTGGAACTGGATGAACAGTTTACCCACCATTAGCAAGAAATATCGCTCACTCTGGCCCTTCCGTAGATT
TAGCAATTTTTTCCCTTCACCTTGCTGGAGTCTCTTCGATTCTAGGGGCTATCAATTTTATAGCCACAACTATTAATATA
AAACCTTCATCAATAAAAACAGACAAAATCCCCTTATTCGTTTGATCAATTTTCATTACAACTATCTTACTACTTTTATC
ATTACCAGTTCTAGCAGGAGCTATCACAATATTACTTACAGACCGAAATTTTAATACATCATTTTTTGATCCTGCAGGAG
GAGGAGATCCGATTTTATATCAACACCTTTTCTGATTTTTTGG
>PPELE046-11|Araneae|COI-5P|JN308352
TACTTTATATTTATTGTTTGGGGCTTGATCTGCTATAGTAGGGACAGCTATAAGAGTGATAATTCGGATTGAGTTAGGAC
AGCCTGGAAGTTTTTTTGGGGACGATCAATTATATAATGTTATTGTTACTGCTCATGCCTTTGTGATAATTTTTTTTATA
GTAATGCCTATTTTAATTGGAGGATTTGGAAATTGGTTGGTTCCGATAATATTGGGGGCTCCAGATATGGCTTTTCCTCG
AATAAATAATTTAAGTTTTTGACTTTTACCTCCTTCTTTAATGTTATTATTTATCTCTTCAATAGTAGAGATAGGTGTGG
GGGCAGGGTGGACTGTGTACCCCCCTTTGTCTTCTTTAGAAGGGCATGCAGGGAGATCTGTTGATTTTGCGATTTTTTCT
TTACATTTAGCAGGAGCTTCTTCAATTATAGGGGCTATCAATTTTATTTCAACAATTTTAAATATACGGTCTTATGGGAT
AAGATTAGAGAAGGTTTCTTTATTTGTGTGGTCAGTTTTAATTACGGCTGTTTTGTTACTTTTATCTCTTCCGGTTTTAG
CGGGGGCTATTACTATGTTATTAACTGATCGAAATTTTAACACCTCTTTTTTTGACCCAGCTGGGGGAGGGGATCCTATT
TTGTTTCAACATTTATTT
>PMWMC020-07|Trombidiformes|COI-5P
TACTCTATATTTTGCTTTTGGAGCATGGGCTGGCATAGTTGGGGCGTCAATAAGTATACTGATTCGATTCGAGCTTGGCC
AACCTGGTGCTTTTATCGGGAATGATCAAATTTATAATGTATTAGTGACGGCTCATGCTTTTGTTATGATTTTTTTTATA
GTGATGCCAATAATAATTGGTGGCTTCGGTAACTGGTTGGTGCCCTTAATAATTGGGTCCCCTGATATAGCTTTCCCCCG
TATAAATAATATAAGTTTTTGGTTATTGCCTCCCTCTCTTACTTTGTTGCTATTATCTTCATTAGTTGGCATAGGAGTGG
GGACAGGGTGAACTGTTTACCCCCCTCTTTCTATAAATATTGCTCATGGCGGTATTTCAGTAGATCTTTCTATTTTTTCC
CTGCATTTAGCGGGAGTTTCGTCAATTTTAGGCGCAGTTAATTTTATAGCTACTATTCTTAATATAAAAAGAGTATATAT
AAAATTTGAGCAGATTCCTTTATTTGTTTGATCTGTTTTTATCACTGCAATTTTGTTATTATTATCTTTACCCGTACTAG
CAGGGGCTATTACTATGTTGTTGACTGATCGGAATTTTAATACTTCTTTTTTTGACCCAGCAGGGGGAGGGGACCCTATT
TTATTCCAACATTTATTT
>OWM025-13|Trombidiformes|COI-5P
CATAAAGATATTGGAACTCTATATTTTGCTTTTGGTGCATGATCAGGAATAGTTGGAGCAAGCTTAAGAAGCTTAATTCG
TTTAGAACTAGGACAACCAGGAAGTCTTTTATTCAACGATCAAACCTATAATACAATTGTAACAGCTCATGCTTTTATTA
TAATTTTCTTTATAGTAATACCAATGATAATTGGGGGGTTTGGAAACTGACTACTACCTTTAATATTGAGAGCCCCTGAT
ATAGCATTTCCACGAATAAATAACATAAGATTCTGACTACTACCACCATCACTCACCCTCCTTCTTTCTAGAACCTTTAC
TTCAATAGGAGCTGGAACTGGATGAACAGTCTACCCTCCCCTAGCAAGAAACATTGCCCATTCAGGACCATCCGTAGATT
TAGCAATTTTTTCTCTTCACCTCGCAGGAGTATCTTCAATTCTTGGGGCTATTAATTTTATGGCCACAACTATAAATATA
AAACCTTCATCAATAAAAACAGATAAAATCCCTCTATTTGTTTGATCAATTTTCATCACAACTATTTTACTTCTTTTATC
TTTACCAGTTTTAGCAGGAGCTATTACAATATTATTAACAGATCGAAATTTCAATACATCATTTTTCGACCCTGCAGGAG
GAGGAGACCCAATTTTATATCAACATCTATTCTGATTTTTTGG
>WMGSI237-10|Trombidiformes|COI-5P|HQ584442
AACATTATACTTTGCTTTTGGAGCATGGTCAGGAATAGTAGGAGCAAGACTAAGAACATTAATCCGTCTAGAGCTAGGTC
AACCTGGAACATTAATTGGAAGAGATCAAATTTATAATACCATTGTAACAGCTCACGCATTTGTAATAATCTTTTTTATA
GTAATACCAATAATAATTGGAGGATTTGGAAATTGATTAGTCCCTCTTATAATCAGAGCACCAGATATGGCTTTCCCACG
AATAAATAATATAAGCTTTTGACTTCTTCCCCCTTCTATTATTCTCCTATTAACAAGTTCATTTACATCAATAGGTGCAG
GAACAGGATGAACAGTCTACCCACCTCTATCTAGAAACTTAGCACATGCTGGTCCATCAGTTGATTTAACTATTTTTTCA
CTTCATTTAGCAGGAGTATCTTCAATCTTAGGCGCAATCAATTTCATAGCCACAATTATTAATATGAAACCAAGTAAAAT
AAAAATAGAGCAAATTCCTTTATTTGTATGATCTATTTTTATTACAACCATTTTACTGCTTCTTTCTCTTCCTGTATTAG
CCGGAGCAATTACAATATTATTAACAGATCGAAACTTTAACACTTCATTCTTTGATCCAGCCGGAGGAGGAGACCCAATT
TTATATCAACACTTATTC
>SPICA1661-10|Araneae|COI-5P|JF885241
AACTTTATATTTTATTTTTGGTGCTTGAGCTGCCATGGTGGGTACTGCTATAAGAGTTTTAATTCGAATTGAGCTTGGTC
AGACAGGGAGAATGTTAGGAGATGACCATTTATATAATGTTATTGTCACTGCTCATGCCTTTGTAATAATTTTTTTTATA
GTAATACCTATTTTGATTGGTGGGTTTGGTAATTGATTAGTTCCTTTAATGTTAGGGGCTCCAGATATAGCATTTCCTCG
AATAAATAATTTAAGTTTTTGGTTATTACCTCCTTCTTTGTTACTATTATTTATTTCTTCAATAGTTGAAATGGGTGTTG
GTGCTGGATGAACTGTTTATCCTCCTTTATCTTCTTTGGAAGGACATTCAGGTAGTTCTGTTGATTTTGCAATTTTCTCT
TTACATTTAGCTGGGGCTTCTTCAATTATGGGAGCTATTAATTTTATTTCTACTATTATAAATATACGAGTGTATAGAAT
TAGAATAGAGAAGGTTTCTTTATTTGTGTGATCAGTTTTAATTACAGCTGTTCTTTTATTATTGTCTCTTCCTGTGTTAG
CTGGGGCTATTACTATGTTATTAACTGATCGAAATTTTAATACATCTTTTTTTGACCCTGCGGGGGGTGGGGATCCTATT
TTATTCCAACATTTATTT
>SSPAA6656-13|Sarcoptiformes|COI-5P
AACTCTATATTTTGTGTTTGGGGCTTGAGCAGGTCTGTTGGGCTCAGCCTTAAGGGGCCTAATTCGTTTAGAGTTAGGGC
AACCGGGTTCTCTTATAGAGAATGACCAAATTTACAATACAATCGTAACTGCCCACGCTTTTGTCATAATTTTTTTTATA
GTGATGCCAATTATGATCGGGGGCTTCGGGAATTGGCTAGTTCCTATGATGATTGGAGCACAAGATATGGCCTTTCCACG
AATAAATAATATAAGATTTTGACTTCTCCCCCCTTCTTTAACTTTGTTGTCTGCTTCTGCTTTCGCTGGGGCAGGGGTCG
GAACTGGATGGACCGTCTATCCCCCTCTTGCAGGGAATCTCTTCCACTCAGGAATTTCGGTGGATCTTGCAATTTTCAGG
CTACATCTTGCAGGGGCCTCTTCCATCCTAGGGGCCATTAATTTTATCACTACTATTTTAAATATGCGTTCTTCTTCATT
GACCTTAGATTCTATCCCCTTATTCGTTTGATCCGTTTTAATTACTGCAGTACTTCTTCTACTTTCTTTACCAGTTTTGG
CAGGAGCAATCACCATACTTTTAACAGACCGAAACTTCAACACTTCGTTCTTTGACCCTCCGGGGGTGGA
>MYMCE153-12|Propelopscanadensis|COI-5P|JX835423
AACTCTATACTTCATTTTTGGAGCCTGAGCCGGGCTACTTGGTTCAGCTTTAAGGGGGCTTATTCGTTTAGAGCTGGGTC
AGCCTGGTTCTCTGTTAGAAAACGATCAAATTTATAACACAATTGTTACAGCTCATGCTTTTGTTATAATTTTTTTTATA
GTAATACCAATTATAATTGGAGGATTTGGAAATTGATTGGTACCTATGATAATTGGTGCGCAGGACATAGCTTTTCCACG
AATAAATAACATAAGATTTTGACTCCTTCCCCCGTCTCTAGCACTTTTATCTTCTTCAGCGTTTGCTGGGATGGGAGCCG
GAACTGGGTGAACGGTGTACCCTCCGTTAGCAGGAAATCTGTTCCATTCGGGGTTTTCAGTAGATCTGGCGATCTTTAGC
CTGCATTTAGCAGGAGCTTCGTCAATTTTAGGAGCGATCAACTTCATTACAACTATTTTAAATATACGTTCATCTTCTAT
AACATTAGACTCGATTCCTTTGTTCGTTTGGTCAGTACTGATTACCGCAGTTCTTTTGTTGCTTTCTCTACCAGTTTTAG
CCGGAGCCATTACTATGCTACTCACAGACCGAAATTTTAATACAACTTTTTTTGACCCTTCTGGTGGCGGGGATCCTATT
CTCTATCAACATTTGTTT
>MYMCG036-12|Tectocepheus|COI-5P|JX835255
AACTTTATATTTTATTTTAGGAGCTTGAGCGGGGTTGATAGGATCTTCTCTGAGAGGTTTAATTCGTTTAGAACTAGGAC
AGCCTGGCTCGTTACTTGGAAATGATCAAATTTATAACACTATTGTGACAGCTCACGCTTTTGTAATGATTTTCTTTATA
GTAATACCTATTATAATTGGGGGCTTTGGTAATTGATTAGTTCCTATAATAATCGGGGCTCAAGATATAGCATTTCCTCG
AATGAATAACATAAGATTCTGGCTTCTACCACCCTCTTTAATATTTTTGTCTGTATCTTCTTTTGCCGGGGTAGGTGTAG
GTACTGGTTGAACAGTTTATCCCCCTCTCTCTAGGGGAATATTTCACGCTGGTTTTTCAGTGGATCTAGCTATTTTTAGG
TTACACTTGGCTGGTGCTTCTTCTATCTTAGGAGCCATTAATTTTATTACGACTATTTTGAATATACGATCTCTTTTTAT
TAGGTTAGACAGAATTCCTTTATTTGTATGATCGGTACTAATTACTGCTATTTTGTTATTATTATCTTTACCAGTATTAG
CCGGAGCTATTACCATATTATTAACAGATCGAAACTTCAATACCTCCTTTTTCGATCCCTCAGGAGGAGGGGATCCTATT
CTATACCAACATTTATTT
>BCMS022-12|Amblypygi|COI-5P
TACACTATACCTCCTTCTAGGCATCTGAGCCGCCATAGTAGGGACTTCTCTAAGAGTCTTAATTCGTTCAGAGCTAGCTC
AACCAGGGTCCCTAATTGGGGATGATCAAATTTATAATGTTATTGTGACAGCTCACGCCTTTGTAATAATCTTCTTTATA
GTAATACCAATTATAATTGGAGGATTCGGAAATTGGCTCATTCCTTTAATATTAGGAGCCCCTGATATAGCTTTCCCCCG
CCTTAATAACCTAAGCTTTTGATTACTTCCGCCTTCTTTCATCCTCCTCCTAAGCTCTGCTCTTACAGAAAGAGGGGCTG
GAACAGGATGAACAGTCTACCCTCCTCTCTCGAGAGGAGAAGCCCATATAGGCTCATCAGTTGATTTAACAATTTTTTCC
CTTCACCTAGCAGGTATCTCATCAATTTTAGGGGCTATTAACTTCATCACTACAATCCTCAATATACGAAGAAGAGGTAT
ACTTCTTGAGCGCATCCCCCTCTTTATCTGATCAGTAAAAATTACAGCCATTCTCCTTCTCCTGTCCCTCCCAGTACTTG
CCGGGGCCATCACCATACTTCTCACAGACCGCAACTTTAATACCAGATTCTTTGACCCTTCCGGAGGAGGGGACCCTATT
TTGTACCAACATTTATTT
>MYMCA600-11|Zygoribatula|COI-5P|JX836829
GACTTTATACTTTGTTTTTGGGGCTTGGGCAGGATTATTAGGATCTGCCTTAAGGGGCCTAATTCGTCTAGAATTGGGGC
AGCCAGGTTCTTTGATAGAAAACGATCAAATTTATAACACTATCGTAACAGCTCACGCTTTTGTGATAATTTTTTTCATG
GTGATGCCAGTTATAATTGGGGGATTCGGTAATTGACTAGTTCCCATAATAATTGGAGCTCAGGATATGGCGTTTCCTCG
AATAAATAATATAAGATTTTGACTTTTACCACCTTCCCTAACTCTTTTGTCTGCATCTGCTTTCGCTGGTGTGGGAGTAG
GAACTGGTTGAACGGTGTATCCTCCCTTAGCAGGAAATCTGTTTCATTCAGGAATCTCTGTAGATCTAGCTATCTTTAGA
TTACACTTAGCCGGGGCTTCTTCTATTCTAGGGGCTATTAATTTTATTACTACGATTTTAAATATACGGTCTTCATCTTT
AACATTAGATTCAATTCCCCTTTTTGTATGATCTGTTCTAATTACAGCAGTGTTATTGCTGCTATCCCTGCCTGTATTAG
CCGGAGCAATCACTATGCTATTAACAGACCGAAATTTTAATACTTCATTTTTTGACCCGTCCGGAGGAGGGGACCCAATT
TTATACCAACACTTATTT
>SSBAD3129-12|Mesostigmata|COI-5P
AACTCTTTATTTAATTTTTGCGCTTTGAGCAGGAATAATTGGCACTTCCCTTAGTATAATTATTCGAGCAGAGCTAGGAC
AACCCGGGTCCCTAATTGGGGATGATCAAATTTATAACACAATTGTCACTGCTCATGCTTTTATTATAATTTTTTTTATA
GTAATGCCAGCAATAATTGGGGGATTTGGAAATTGATTAACCCCTATTATAATTGGGGCTCCGGATATGGCATTCCCCCG
ACTAAATAACATAAGATTTTGACTTTTACCCCCAAGAATTATTCTTCTTTTAAGAAGAAGAATAGTAGAGATAGGAACAG
GAACAGGATGAACTGTATACCCTCCTTTAGCTAGAAATATCAGACACAGAGGCAGAGCAGTGGATCTATCAATCTTTAGA
TTACATTTAGCAGGGGTTTCAAGAATTTTAGGGTCCATTAACTTTATCTCTACTATCCTAAACATACGTCCTTTCTCATT
GAAGTTAGAACAATTACCTCTTTTTGTATGATCTGTTTTTATTACTACTATTCTTCTCTTATTAAGATTGCCAGTCTTAG
CAGGAGCCATTACTATACTTCTCCTAGACCGAAATTTTAATACGTCATTTTTTGACCCTAGAGGGGGGGGAGAC
>BBUSA1338-10|Araneae|COI-5P|HQ931026
AACTTTATATTTTATTTTTGGTGCTTGAGCTTCTATAGTGGGGACAGCTATAAGAGTATTAATTCGGATTGAATTGGGTC
AATCCGGAAGATTTTTAGGAGATGATCAACTTTATAATGTTATTGTTACAGCTCATGCTTTTATTATAATTTTTTTTATA
GTAATACCTATTTTAATTGGTGGATTTGGAAATTGATTGGTGCCCCTAATATTAGGGGCACCAGATATAGCTTTCCCTCG
TATGAATAATTTAAGATTTTGACTTCTTCCCCCATCTCTTTTTTTACTATTTATTTCTTCAATAGTAGATATAGGGGTAG
GGGCTGGATGAACTGTTTATCCTCCTTTAGCTTCCTTAGAAGGACATTCTGGAAGTTCTATAGATTTTGCTATTTTTTCT
CTTCATTTAGCTGGGGCTTCTTCTATTATAGGAGCTATTAATTTTATTTCTACTATCTTTAATATACGAGTTAATGGAAT
GAGAATGGAAAAAGTTCCTTTATTTGTTTGATCTGTGCTGATTACTGCTGTGTTGTTATTGTTATCGCTTCCTGTTTTAG
CTGGGGCTATTACTATATTATTAACGGATCGAAATTTTAATACCTCTTTTTTTGACCCTTCTGGGGGAGGGGATCCTGTT
CTTTTTCAACATTTATTT
>AUSPI016-11|Araneae|COI-5P
TACTTTATATTTAATTTTTGGTGCTTGATCTGCTATAGTAGGTACTGCAATAAGAGTATTAATTCGTATAGAATTAGGAC
AGTCTGGTGCTTTTTTAGGAGATGATCATTTATATAATGTGGTAGTTACAGCTCATGCTTTTGTGATGATTTTTTTCATA
GTAATACCAATTTTAATTGGTGGTTTTGGTAATTGAATAGTTCCTATAATATTAGGGGCTGCTGATATAGCTTTTCCTCG
CATAAATAATTTGAGTTTTTGATTATTACCTCCTTCTTTATTATTGTTATTTATTTCTTCTATAGCTGAAATAGGAGTTG
GTGCAGGGTGAACTGTTTATCCTCCTCTTGCTTCTACTGTAGGGCATATAGGGAGAGCTATAGATTTTGCTATTTTTTCA
TTACATTTAGCAGGTGCTTCTTCTATTATAGGAGCAGTTAATTTTATTACTACTATTATTAATATACGATCTGTAGGGAT
AAGTATGGAAAAAATTTCTTTATTTGTATGATCAGTACTAATTACTGCAGTTTTATTATTATTATCTTTACCCGTGTTAG
CAGGTGCAATTACTATATTATTAACAGATCGTAATTTTAATACTTCTTTTTTTGATCCGGCAGGAGGAGGTGATCCTATT
TTATTTCAACATTTGTTT
>ERSCH101-07|Pityohyphanteslimitaneus|COI-5P|KF368710
ACTTTATATTTTATTTTTGGTGCTTGATCAGCTATAGTAGGGACAGCTATAAGAGTTTTAATTCGTATTGAGTTAGGACA
AATTAGAAGAGTTTTAGGTAATGATCAGCTTTATAATGTAATTGTTACTTCTCATGCTTTTGTAATAATCTTTTTTATGG
TTATACCTATTTTAATTGGAGGGTTTGGAAATTGGTTAGTACCCTTAATATTAGGGGCTCCTGATATAGCTTTCCCACGC
ATAAATAATTTAAGATTTTGATTACTCCCCCCTTCTTTATTATTATTATTCATTTCCTCTATAGTAGAAATAGGGGTGGG
GGCGGGTTGAACTGTTTATCCCCCTTTATCTTCTTTAGAAGGGCATTCTGGAGGTTCTGTCGATTTTGCTATTTTTTCTT
TACATTTAGCAGGGGCATCTTCAATTATAGGGGCTATCAATTTTATTTCTACTATTTTAAATATGCGGGCTTATATAATT
AGAATGGAAAAGGTTTCTTTATTTGTTTGGTCTATCTTAATTACTGCTGTTCTTTTATTATTATCTTTACCTGTATTAGC
TGGAGCTATTACTATATTGTTAACTGATCGAAATTTTAATACTTCATTTTTTGACCCCGCGGGGGGAGGGGATCCCATTT
TATTTCAGCATTTATTT
>SAMIT517-10|Trombidiformes|COI-5P|HQ972888
AACTCTATATTTTGCCTTTGGAGCATGGTCTGGGATAGTAGGGGCCAGCCTTAGAACTTTAATCCGATTAGAATTAGGCC
AACCAGGAAGACTAATATTCAACGATCAAGTATATAACACTATTGTGACTGCCCATGCTTTCATCATAATCTTCTTCATA
GTAATACCAATAATAATTGGAGGATTTGGAAATTGACTCGTTCCTCTAATACTAAGAGCACCAGATATGGCATTCCCCCG
AATAAATAACATAAGCTTCTGACTTCTACCTCCATCTCTATCTCTTTTACTATCTAGATCTTTTACATCTATAGGAGCAG
GTACCGGATGAACTGTTTATCCTCCTCTATCTAGAAATATTGCTCATTCTGGTCCATCTGTGGATTTAGCTATTTTTTCT
CTTCATTTAGCAGGAGTGTCTTCAATCTTAGGTGCTATTAATTTTATGGCAACAACCATAAATATAAAGCCAACTTCAAT
AAAAATTGACAAAATACCACTTTTCGTTTTATCAATTTTTATTACCACTATTCTATTGCTTCTCTCTCTTCCAGTACTGG
CAGGAGCCATCACAATACTATTAACAGATCGAAACTTCAACACATCATTCTTTGATCCTGCTGGAGGGGGAGACCCTATT
CTTTATCAACACTTATTT
>SPIEU778-10|Araneae|COI-5P|JF886300
AACGTTATATTTTTTATTTGGATTATGAGCTTCAATGGTAGGTACAGCTATAAGAGTAGTAATTCGTATGGAATTAGGTC
AGTCTGGTAGATTATTAGGGGATGATCATTTATATAATGTAATTGTTACGGCTCATGCTTTTGTTATAATTTTTTTTATA
GTAATGCCTATTTTGATTGGAGGTTTTGGAAATTGATTAGTTCCTTTAATATTAGGTGCTCCTGATATAGCTTTTCCACG
TATAAATAATTTAAGATTTTGATTATTACCTCCTTCATTAGTTTTATTATTTATTTCTTCTATAGCTGAAATAGGAGTGG
GAGCTGGTTGAACAGTTTATCCACCATTAGCTTCTAATATTGGACATGCTGGAAGTGCTATGGATTTTGCTATTTTTTCA
TTACACTTAGCTGGGGCTTCTTCTATTATGGGAGCTGTTAATTTTATTTCTACTATTGTAAATATACGGATATTAGGAAT
AAGAATGGAAAAGGTCTCGTTATTTGTATGATCTGTATTAATTACTGCTGTTTTATTATTATTATCTTTACCGGTTTTGG
CTGGTGCAATTACAATATTGTTAACTGATCGTAATTTTAATACTTCGTTTTTTGACCCAGCAGGAGGAGGTGATCCTATT
TTGTTTCAACATTTATTT
>CNPPH1188-12|Trachelastranquillus|COI-5P|KJ444378
GACTTTGTATTTGTTGTTTGGATCTTGATCTGCTATACTAGGTACTGCTATAAGTGTTTTAATTCGAATGGAATTAGGTC
AAGTAGGTAGATTGTTAGGAGATGATCATTTATATAATGTAATTGTTACTGCCCATGCTTTTGTTATGATTTTTTTTATA
GTAATACCTATTATAATTGGGGGATTTGGTAACTGATTAGTTCCTTTAATGTTAGGAGCTCCGGATATAGCTTTTCCTCG
AATAAACAATTTAAGCTTTTGATTATTACCACCGTCATTAATTTTACTGTTGATTTCATCAATAGTCGAAATAGGAGTAG
GGGCTGGTTGAACTGTGTATCCCCCTTTAGCTTCTTTGGAAGGTCATGCAGGATCGGCAATGGATTTTGCTATTTTTTCT
TTACATTTAGCCGGGGCTTCTTCTATTATAGGGGCGATTAATTTTATTTCTACTATTATTAATATACGTTCTATTGGAAT
AAGAATGGAAAAGGTTTCTTTATTTGTGTGGTCTGTATTGATTACTGCTATTTTGTTATTATTATCTTTACCGGTATTAG
CTGGTGCTATTACTATATTATTGACTGATCGTAATTTTAATACATCTTTTTTTG
>SPICH004-09|Agynetaallosubtilis|COI-5P|GU683853
GAGTTTATATTTTATTTTTGGAGCTTGGGCAGCTATAGTAGGTACGGCAATAAGAGTGTTAATTCGAATTGAATTAGGTC
AAACTGGGAGATTATTAGGTGATGATCAACTGTATAATGTTATTGTAACTGCTCATGCTTTTGTAATAATTTTTTTTATA
GTGATACCAATTTTAATTGGGGGATTTGGAAATTGACTAGTCCCTTTAATGTTAGGAGCTCCTGATATAGCATTCCCTCG
AATAAACAATCTTAGATTTTGATTATTACCTCCTTCTTTGTTTTTGCTTTTTATTTCTAGTATAGATGAAATAGGGGTAG
GAGCGGGATGAACTGTGTATCCCCCGCTTGCTTCTTTAGAAGGGCATGCTGGAAGTTCTGTTGATTTTGCTATTTTTTCT
TTACATTTAGCTGGGGCTTCTTCAATTATGGGGGCTATTAATTTTATTTCTACTATTTTAAATATACGAGGTTATGGGAT
AACTATAGAAAAAGTACCTTTATTTGTGTGATCAGTTCTTATTACAGCTGTTTTGCTTTTATTATCTTTACCTGTTTTAG
CAGGAGCTATTACTATATTATTAACTGACCGCAATTTTAATACGTCATTTTTTGACCCTTCGGGTGGAGGGGATCCTGTT
CTTTTTCAACATTTGTTT
>SSBAE4273-13|Sarcoptiformes|COI-5P
AACTCTGTATTTCATTTTTGGAGCCTGGGCCGGCCTTTTGGGGTCTGCTTTAAGGGCTCTGATTCGATTAGAACTAGGGC
AACCCGGATCTCTAATAGAAAACGACCAGATTTACAACACTGTCGTCACTGCCCACGCCTTCGTAATAATCTTTTTTATA
GTAATGCCTGTGATAATTGGGGGATTCGGAAACTGACTAGTGCCTATAATAATCGGAGCACAAGACATGGCTTTCCCCCG
AATAAATAACATAAGATTTTGGTTACTTCCCCCTTCTCTGGCCCTTCTGTCAGCCTCCGCATTCGCAGGAATGGGCGCCG
GTACCGGGTGAACGGTCTATCCTCCGCTAGCTGGTAACTTATTCCATTCTGGATTTTCAGTAGACTTAGCAATTTTCAGG
CTTCACCTAGCCGGCGCTTCTTCAATTTTAGGGGCCATCAATTTTATCACTACTATTATGAACATACGATCAGCCTCTAT
GAGCCTAGACTCCATCCCGTTATTTGTATGATCAGTGTTAATTACAGCGGTTCTCTTGTTACTTTCTTTACCGGTGCTAG
CCGGAGCTATCACGATACTTTTAACAGACCGAAATTTTAACACCTCCTTCTTTG
>SPISH017-09|Hahniacinerea|COI-5P|GU683967
CACATTATATTTAGTTTTTGGGGCATGGTCTGCTATAGTAGGAACAGCTATAAGAGTTCTTATTCGAATTGAATTAGGGC
AACCAGGTAGATTTATAGGAGATGATCATTTATATAATGTTATTGTTACAGCTCATGCATTTGTTATAATTTTTTTTATA
GTTATACCAATTATAATTGGTGGGTTTGGTAATTGATTAGTACCTTTAATATTAGGGGCTCCAGATATGGCTTTTCCTCG
AATAAATAATTTAAGATTTTGATTGTTGCCGCCATCTTTAATATTGTTGTTTGTTTCTTCTATAGTAGAGATGGGAGTGG
GGGCAGGATGAACTGTGTATCCCCCTTTAGCTTCAACAATGGGGCATGCTGGCAGATCTGTAGATTTTGCTATTTTTTCG
TTACATTTAGCAGGGGCTTCTTCTATTATGGGGGCTATTAATTTTATTACTACTATTATTAATATACGGTCTTGTGGGAT
GTCTATGGAGAAAATCCCACTGTTTGTATGGTCAGTATTTATTACTGCAATTTTATTGTTGCTTTCTCTTCCGGTTCTTG
CTGGTGCGATTACAATACTTTTGACTGATCGGAATTTTAATACTTCATTTTTTGATCCTGCCGGAGGTGGGGATCCTATT
TTATTTCAACATTTGTTT
>CHEFI595-12|Araneae|COI-5P
TACGTTATATTTATTATTTGGGGCTTGGGCAGCTATAGTAGGAACAGCAATAAGAATTTTAATTCGAATAGAATTAGGAC
AGCCTGGAAGATTTTTAGGGGATGATCAGTTGTATAATGTAGTGGTTACTGCTCATGCATTTGTAATAATTTTTTTTATA
GTGATACCAATTTTAATTGGGGGATTTGGGAATTGATTAGTTCCTTTAATATTAGGAGCTCCTGATATAGCTTTTCCTCG
AATAAATAATTTAAGATTTTGGTTATTACCTCCTTCATTAATATTATTATTTATTTCTTCAATAGTGGAAATAGGAGTAG
GGGCTGGATGGACAGTTTATCCTCCTTTATCTTCTTTAGAAGGTCATTTTGGTAGAAGAGTGGATTTTGCTATTTTTTCT
TTACATTTAGCGGGAGCGTCATCAATTATAGGAGCTATTAATTTCATTTCAACAATTTTAAATATACGAATATATGGAAT
ATCTATAGAAAAGGTTTCATTATTTGTTTGATCTGTATTAATTACAGCGGTATTATTATTATTATCTTTACCAGTTTTAG
CTGGAGCTATTACTATATTATTAACTGATCGAAATTTTAATACTTCGTTTTTTGATCCGGCTGGTGGAGGAGATCCTATT
TTATTTCAACATTTGTTT
>CNJAD2343-12|Sarcoptiformes|COI-5P
AACTTTATACTTCGTTTTCGGAGCCTGAGCAGGCCTTCTCGGATCTGCTTTAAGAGGGCTGATCCGATTAGAGTTAGGAC
AACCAGGCTCCTTAATAGAAAACGATCAAATTTATAACACAATCGTTACTGCCCATGCTTTTGTAATAATCTTTTTCATG
GTCATGCCTGTAATAATTGGAGGCTTCGGAAATTGGCTTGTACCTATGATAATCGGAGCACAAGATATGGCTTTCCCCCG
TATAAATAACATGAGTTTTTGACTTCTTCCCCCTTCATTAACATTATTATCAGCTTCAGCTTTTGCGGGGGTTGGGGCTG
GTACAGGATGAACGGTATACCCCCCATTGGCTAGAAACTTATTTCACTCTGGTATTTCGGTAGACTTAGCTATTTTCAGT
TTGCATCTCGCTGGGGCTTCTTCTATTCTGGGAGCCATTAATTTTATTACAACTATTTTAAACATGCGTTCTTCCTCTCT
TACTTTGGATTCAATTCCACTTTTTGTGTGATCAGTGTTGATTACAGCAGTATTATTATTACTATCCTTACCAGTACTTG
CAGGCGCTATTACGATACTGCTCACTGACCGGAATTTTAATACTTCTTTTTTT
>AEDNA009-12|Theridionpictum|COI-5P|KC502845
AACTTTATATTTAGTATTTGGTGCTTGAGCGGCAATAGTTGGAACTGCTATAAGAGTATTAATTCGTGTTGAATTAGGAC
AGCCTGGAAGATTTATAGGGGATGATCAATTATATAATGTTATTGTAACATCCCATGCTTTTGTAATAATTTTTTTTATA
GTAATACCAATTTTAATTGGTGGTTTTGGAAATTGGTTAGTTCCTTTAATATTAGGAGCTCCTGATATGGCATTTCCTCG
TATAAATAATTTAAGTTTTTGATTATTACCTCCTTCTTTGTTTTTATTATTTATTTCTTCTATAGTTGAAATAGGTGTAG
GATCAGGTTGAACTGTATATCCACCTTTATCATCTTTAGATGGTCATGGGGGTAGTTCAGTAGATTTTGCAATTTTTTCT
TTACATTTAGCTGGGGCTTCTTCTATTATAGGAGCTGTTAATTTTATTTCTACTATTTTGAATATACGATCGTATGGTAT
AACAATAGAAAAAGTTCCTTTATTTGTTTGATCAGTTCTAATTACTGCTGTATTATTACTTTTATCTTTACCTGTTTTGG
CAGGTGCTATTACTATATTATTAACTGATCGAAATTTTAATACATCGTTTTTTGATCCTGCTGGAGGTGGTGATCCAATT
TTATTTCAACATTTATTT
>CHACB1091-10|Ceratozetesthienemanni|COI-5P|HM907197
AACTCTATATTTCATCTTCGGAGCTTGAGCAGGTTTGTTAGGATCCGCCCTAAGAGGTCTCATTCGCTTAGAACTAGGAC
AGCCTGGTTCTTTTATAGAAAATGACCAAATTTATAACACAATTGTTACAGCTCATGCCTTTGTGATAATTTTTTTCATA
GTTATGCCTGTGATAATTGGAGGATTCGGAAATTGGTTGGTTCCAATAATAATTGGCGCTCAAGATATAGCTTTCCCTCG
CATAAATAATATAAGATTTTGGCTACTGCCTCCCTCCTTAGCACTTCTTTCTAGCTCTTCTTTTGCTGGAATGGGAGTAG
GTACGGGCTGAACAGTTTATCCCCCCCTAGCCGGAAATCTTTTTCACTCAGGGTTTTCTGTAGATTTAGCTATTTTTAGA
TTACACTTAGCCGGAGCTTCTTCAATTTTAGGTGCAATTAACTTTATCACTACAATTATGAATATACGAACTTCTTCTAT
AACCTTGGACTCTATCCCACTATTTGTTTGATCTGTATTAATTACAGCAGTTTTACTTCTTTTATCTCTACCGGTTCTAG
CTGGAGCCATTACCATACTTCTCACAGATCGAAATTTTAACACTTCTTTTTTCGATCCTTCCGGAGGTGGGGATCCAATT
TTATATCAACACCTGTTT
>SPRMA1215-12|Araneae|COI-5P
AAGATTATATTTTATTTTTGGTGCTTGGGCTGCGATAGTGGGGACAGCAATAAGAGTGTTAATTCGAATTGAATTAGGTC
AAATAGGAAGATTATTAGGAGATGATCAATTATATAATGTTATTGTTACTGCTCATGCTTTTGTTATAATTTTTTTTATG
GTTATGCCTATTTTAATTGGTGGTTTTGGAAATTGGTTGGTTCCTTTAATGCTTGGGGCTCCTGATATAGCTTTTCCTCG
TATAAACAATTTAAGATTTTGGCTATTACCCCCTTCTTTATTTTTGTTATTTATTTCTAGTATGGATGAAATAGGGGTAG
GAACTGGGTGAACAGTTTATCCACCTATTGCTTCTCTAGAGGGGCATGCTGGTACTTCAGTGGATTTTGCTATTTTTTCA
TTACATTTGGCTGGGGCTTCTTCAATTATGGGGGCTATTAATTTTATTTCTACTATTTTAAATATACGGGGTTATGGTAT
AACTATAGAGAAAGTTCCTTTATTTGTTTGATCTGTGTTAATTACAGCGGTTCTTCTTCTTTTATCTTTACCTGTGTTAG
CAGGGGCTATTACTATATTGCTGACCGATCGAAATTTTAATACTTCGTTTTTTGACCCATCGGGAGGAGGAGATCCTATT
TTGTTTCAACATTTATTT
>SPIRU1124-11|Sitticusranieri|COI-5P|KF368802
TACGTTATATTTAGTTTTTGGAGCTTGGTCTGCTATAGTTGGTACGGCTATAAGAGTTTTAATTCGTATAGAATTAGGTC
AAACTGGTCATTTTTTAGGAAATGATCATTTGTATAATGTAATTGTTACTGCACATGCATTTGTTATAATTTTTTTTATA
GTAATACCTATTTTGATTGGAGGTTTTGGTAATTGATTAGTCCCTCTAATGTTAGGAGCTCCGGATATAGCTTTTCCTCG
TATAAATAATTTAAGTTTTTGATTATTACCTCCTTCATTATTTTTATTATTTATTTCATCTATAGCTGAGATAGGAGTAG
GGGCAGGGTGAACTGTTTATCCTCCATTAGCTTCTATTGTAGGTCATAATGGAAGTTCGGTAGATTTTGCTATTTTTTCT
CTTCATTTGGCTGGGGCTTCATCAATTATAGGTGCTATTAATTTTATTTCAACTGTTATTAATATACGATCGGTGGGTAT
ATCAATAGATAAGATTCCATTGTTTGTTTGGTCTGTTGTAATTACTGCTGTATTATTGTTATTGTCTTTACCTGTTTTAG
CGGGTGCAATTACTATGCTATTGACTGATCGAAATTTTAATACGTCTTTTTTTGATCCTGCTGGAGGAGGGGATCCAATT
TTATTTCAACATTTATTT
>GACAC914-12|Atraxsutherlandi|COI-5P|JN130228
GCAATAAGAGTAATTATTCGTACTGAATTGAGACAGGTGGGAAGTTTATTAGGCGACGATCACTTGTATAATGTTATTGT
AACTGCGCATGCATTGGTTATAATTTTTTTTATGGTTATGCCGATTATAATTGGTGGGTTTGGAAATTGATTAATTCCTC
TTATATTAGGAGCACCAGATATGGCTTTTCCTCGAATGAATAATTTGAGTTTTTGATTACTTCCTCCATCATTGTTTATA
TTATTATTATCATCATTAACAGATAGAGGTGTAGGGGCTGGATGGACAATTTACCCTCCTTTATCTTCAGGGGTGGGTCA
TAGTGGCGGGAGAATGGATTTTGCTATTTTTTCTTTACATTTAGCTGGGGCGTCTTCAATTATAGGTGCTATTAATTTTA
TTTCTACTATTATTAATATACGAATGATGGGGATAACTATAGAACGTGTCCCTTTATTTGTGTGGTCAGTATTAATTACT
GTTATTCTTCTTTTATTATCTTTACCTGTTCTTGCTGGGGCTATTACTATATTATTAACTGATCGAAATTTTAACACTTC
TTTTTT
>SPICA1276-10|Araneae|COI-5P|JF884839
AACTTTATATTTAGTATTTGGAGCTTGAGCTGCAATAGTAGGAACAGCAATAAGTGTTTTAATTCGAATTGAATTAGGAC
AGCCTGGAAGATTTTTAGGAGATGATCAATTATATAATGTTATTGTAACAGCGCATGCTTTTGTAATAATTTTTTTTATA
GTAATACCAATTATAATTGGTGGATTTGGTAATTGATTAGTACCATTAATATTAGGTGCTCCTGATATAGCTTTTCCTCG
TATAAATAATTTAAGATTTTGATTATTACCTCCTTCATTATTTTTATTATTTATTTCTTCTATAGTTGAAATAGGAGTGG
GATCTGGATGAACTGTTTATCCACCCTTATCTTCTTTAGAAGGACATGGTGGAAGATCCGTAGATTTTGCAATTTTTTCT
CTTCATTTAGCTGGGGCTTCTTCTATTATGGGAGCAGTAAATTTTATTTCTACTATTTTAAATATACGATTATATGGAAT
AACTATAGAAAAAGTTTCTTTATTTGTGTGATCTGTATTGATTACTGCTATTCTATTATTATTATCATTACCTGTGTTAG
CAGGTGCTATTACTATATTATTAACTGATCGTAATTTTAATACTTCATTTTTTGATCCAGCTGGAGGAGGAGATCCAATT
TTATTTCAGCATTTATTT
>CHACB111-10|Bdellidae|COI-5P|HQ558404
AACTATATATTTTATTTTTGGAGCTTGATCTTCTTTACTTGGTACCGCTATAAGTATTTTAATTCGGTTAGAACTATCTC
AACCTGGCTCAATAATAGAAAATGATCAAATTTATAACACAATCGTTACAGCCCATGCTTTTATTATAATTTTTTTTATA
GTTATACCCATTATAATTGGGGGATTTGGGAATTGATTAATTCCTTTGATAATTGGATCTCCTGATATGGCTTTCCCTCG
AATAAATAACATGAGATTTTGACTTTTACCTCCTTCATTGGCTCTGTTATTACTTTCATCGTTTTCCAATAATGGAGCGG
GTACGGGGTGAACAGTTTACCCCCCCTTGTCCTCTACATTATCCCATCCTGGTATGTCTGTAGATTTAACAATTTTTTCT
TTACATCTAGCAGGAGTATCTTCTATTTTAGGGGCTATTAATTTTATGTCAACTATTATTAATATACGTAGCCCCTACAT
GATTTTTGAACGAATCCCCCTATTCGTTTGGTCTGTTTTTATCACTGTTTTATTATTGTTATTATCCTTACCCGTTCTTG
CTGGAGCTATCACAATACTCTTGACAGATCGAAATTTTAATACTTCCTTTTTTGACCCTATAGGAGGAGGAGACCCGATT
CTATATCAACATTTATTC
>CNEIF2398-12|Trombidiformes|COI-5P
AACTTTATATTTTATGTTTGGACTATGATCGGCCTTTTTAGGAGCTTCAATAAGAATTTTTATTCGAATAAAATTAGGAA
ATCCAAGTCTTATGACACAAAACGACCAAATTTATAATGTTATAGTCACAGCCCACGCTTTTGTAATAATTTTCTTTATG
GTAATACCAATTATAATTGGTGGATTTGGAAATTGACTAGTACCAATCATAATCGGAGCCCCTGATATAGCTTTTCCACG
AATAAATAATATAAGTTTTTGATTATTACCCCCATCAATCTCTCTTTTAATTATATCATCAATTACAGATAGTGGAGCAG
GAACAGGATGAACTGTTTACCCACCTCTATCAAATCAACTTTTTCATGGAGGGTCTTCAGTAGACTTAACTATTTTTTCT
TTACATATAGCAGGAATTTCTTCTATTTTAGGAGCAGTTAATTTTATTACTACAATTTTAAATATACGATCTAGCTTAAT
AAACTATGAACGAATCCCCCTATTTGTTTGATCTGTTATAATTACAGCAATTCTATTACTTTTATCATTACCTGTATTAG
CGGGGGCTATTACTATATTATTAACAGATCGAAATTTTAATACTTCTTTTTTTGACCCAGCAGGAGGAGGAGACCCAATC
>ERSPI374-09|Theridionmurarium|COI-5P|GU682477
AACTTTGTATTTAGTATTTGGAGCTTGAGCTGCTATAGTAGGTACTGCAATAAGAGTATTAATTCGAGTTGAATTAGGTC
AGCCTGGGAGATTTATGGGAGATGATCAATTATATAATGTAATTGTTACGGCACATGCATTTGTAATAATTTTTTTTATA
GTTATACCTATTTTAATTGGAGGTTTTGGAAATTGATTAGTTCCTTTAATATTAGGTGCACCTGATATGGCTTTTCCTCG
AATAAATAATTTGAGTTTTTGATTATTACCTCCTTCTTTATTTTTATTATTTATTTCTTCTATGGTAGAAATAGGAGTAG
GTGCTGGATGAACTGTTTATCCACCATTATCATCTTTGGATGGTCATGGAGGTAGATCTGTGGATTTTGCTATTTTTTCA
TTACATTTGGCTGGAGCTTCGTCTATTATAGGGGCTGTAAATTTTATTTCTACTATTTTAAATATACGATCATATGGAAT
GAGAATAGAAAAAGTGCCTTTATTTGTATGGTCAGTATTAATTACTGCTGTATTATTACTTTTATCATTACCTGTATTAG
CTGGTGCTATTACAATGTTATTAACAGATCGTAATTTTAATACTTCTTTTTTTGATCCAGCAGGAGGTGGAGATCCTATT
TTATTTCAACATTTGTTT
>AMSCO125-10|Scorpiones|COI-5P
AACTATGTATTTAATTTTGGGAGGTTGAGCTTCTATAGTTGGAACTGCGTTAAGATTAATAATTCGTGCTGAAATTGGGA
GTCCTGGGTCTTTTATTGGAGATGATCAAATTTATAATGTTGTTGTTACTGCTCATGCATTTGTTATAATTTTTTTTATA
GTTATGCCTGTGATAATTGGGGGATTTGGAAATTGACTTGTTCCTTTAATATTGGGTGCTCCTGATATAGCTTTTCCGCG
TTTGAATAATATAAGTTTTTGGTTATTACCGCCTGCATTTTTTATGCTTTTAGGTTCTGCTGCTTTAGAAAGAGGGGCGG
GTACAGGGTGGACTGTTTATCCACCCCTTTCCTCTTATATGTTTCATTCGGGTGGATCTGTTGATATAACTATTTTTTCT
CTTCATTTAGCAGGTGTATCTTCAATTTTAGGGGCTATTAATTTCATTACTACTATTTTAAATATGCGTAGATATGGAAT
ATTGTTGGAGCGTGTTCCTCTTTTTGTATGGTCTGTTAAAATTACTGCTATTCTTTTGTTATTATCATTACCCGTTTTGG
CTGGGGCTATTACGATGCTTCTTACTGATCGAAACTTTAATACTTCTTTTTTTGATCCTGCTGGTGGTGGGGATCCTATT
TTATATCAA
>MYMCG514-12|Oppiidae|COI-5P|JX835295
AACTTTGTATTTTATTTTTGGGGCTTGAGCAGGACTTTTAGGATCCGCTTTAAGAGCTTTAATTCGTTTAGAATTAGGGC
AACCCGGTTCTTTAATAGATAACGATCAAATTTATAACACCATTGTTACTGCACATGCTTTTGTTATAATTTTTTTTATA
GTGATACCAATTTTAATTGGAGGATTTGGAAATTGATTAGTTCCAATAATAATTGGGGCTCAGGATATGGCTTTTCCTCG
AATAAATAACATGAGATTTTGGCTTTTACCCCCTTCTTTAGCTCTTCTTTCAATTTCTGCTTTTGCAGGAGCAGGAGCCG
GAACTGGATGAACAGTTTATCCTCCTTTAGCTGGTAGCTTATTTCATTCTGGTATTTCAGTAGATTTGGCAATTTTTAGG
TTACACTTAGCAGGAGCTTCCTCTATTTTAGGTGCTATTAATTTCATTACTACCATTATAAATATGCGTTCATCATCTAT
GACTCTTGATTCTATCCCGTTATTTGTATGGTCTGTTTTAATTACAGCTGTATTATTATTATTATCTTTACCAGTTTTAG
CTGGAGCTATTACGATGTTATTAACAGACCGTAATTTTAATACTACATTTTTTGATCCTTCCGGAGGAGGAGATCCAATT
TTATATCAACATTTATTT
>MYMCG297-12|Anystidae|COI-5P|JX835320
TACTATATATTTTTTCTTTGGTATATGGGCAGGACTTTTAGGAGCTGCTATAAGAGGTCTTATTCGATTAGAGTTAACTC
AACCCGGCTCTTTATTAGAAAATGATCAAATTTATAATACTATTGTTACAGCTCATGCTTTTGTAATAATTTTTTTTATA
GTAATACCCATTATAATTGGAGGATTTGGTAACTGATTAGTCCCAATTATAATTGGAGCTCCAGATATAGCTTTCCCTCG
AATAAATAATATAAGATTTTGACTTCTTCCTCCTTCACTATCTCTTCTAACTCTTTCTTCTTTTACTTCAAAAGGTAGAG
GAACTGGTTGAACAGTTTATCCTCCTTTATCAAATAATATCTCTCATGCTGGAGCTTCAGTTGATTTAACTATCTTTTCT
CTTCACCTAGCAGGTATTTCTTCTATTTTAGGGGCTATTAATTTTATAACAACTATTATTAATATACGTACATCTAAAAT
TAGATTTGAACAAATTCCTTTATTTGTTTGATCAGTTTTTATCACTACAATTTTACTTTTACTTTCTCTTCCAGTTTTAG
CTGGTGCTATTACTATACTTCTTACAGATCGAAATTTTAATACTACATTCTTTGACCCAGCAGGGGGAGGAGATCCAATT
CTTTATCAACATCTATTT
>HFARA126-10|Araneae|COI-5P|HQ958487
TATTTTGTATTTAATTTTTGGATCATGATCTGCTATAGCAGGAACAGCTATAAGAGTATTAATTCGGGTAGAATTAGGTC
AACCTGGTAGATTATTAGGGGATGATCATTTATATAATGTGGTTGTTACTGCTCATGCTTTTGTTATAATTTTTTTTATA
GTAATACCAATTTTAATTGGTGGGTTTGGAAATTGACTAGTTCCTTTAATATTAGGGGCTCCTGATATAGCTTTTCCTCG
CATAAATAATCTAAGATTTTGGCTTTTACCGCCTTCTTTATATTTATTATTTATTTCTTCTATAGCTGAAATGGGTGTAG
GGGCTGGTTGGACTATTTATCCCCCTTTAGCTTCTGGAGTTGGTCATTCTGGGAGATCAGTAGATTTTGCTATTTTTTCT
TTACATTTAGCTGGTGCTTCTTCGATTATAGGAGCTATTAATTTTATTTCTACTATTATTAATATACGTTCGTACGGAAT
GGAAATAGAAAAAGTTCCATTGTTCGTTTGATCTGTTTTAATTACAGCTGTATTATTATTATTGTCTTTACCTGTTTTAG
CGGGTGCTATTACTATGTTATTAACTGATCGAAATTTTAATACTTCTTTTTTTGATCCTGCAGGAGGAGGAGATCCTATT
TTATTTCAACATTTATTT
>MYMCE436-12|Rhagidiidae|COI-5P|JX838708
AACAATATATTTTGCATTTGGCTTATGATCTGCCTTACTTGGAGCTTCAATAAGAATCCTAATTCGAATAGAACTAGGAC
AACCTGGATCTATAATACAAAACGATCAAATTTATAACACAATTGTTACCGCCCATGCTTTTGTAATAATTTTCTTCATA
GTAATACCAATTATAATTGGAGGTTTTGGAAATTGATTAGTGCCAATAATAATTGGAGCACCAGATATAGCATTCCCACG
AATAAATAACATAAGATTCTGATTATTACCTCCCTCTTTAACCTTACTATTAATATCCTCTTTTACAAGAGCAGGAGTTG
GGACTGGATGAACAGTCTACCCTCCTCTCTCAAGAAATATTGCCCATCCTGGAGGAGCAGTAGATTTAGGAATTTTCTCC
TTACACCTAGCAGGAATTTCTTCAATTCTAGGAGCAATTAACTTTATAACAACAATTATTAATATACGAAACCCATCAAT
AACTTTTGAACGTATTCCACTATTTGTTTGATCCGTATTTATTACAGCATTACTTTTACTACTTTCTTTACCTGTACTAG
CAGGAGCAATTACAATATTACTAACAGATCGAAATTTTAATACTTCTTTCTTCGATCCAGCTGGAGGAGGAGATCCAATT
TTATATCAACATTTATTT
>GMGSP480-13|Trombidiformes|COI-5P
ATCTTTATACTTCATTTTTGGTTTTTGGTCTGGGTTACTGGGTGCTTCTATAAGAATTATTATTCGTGTTAAGTTATCAA
ACCCAGGATTTATAGGGCAGAGTGACCAAATTTATAATGTAATAGTAACTGCTCATGCTTTTATTATAATTTTTTTTATA
GTTATGCCTATTATGATTGGAGGATTTGGAAATTGATTAGTTCCCGTGATAATTGGGGCTCCTGATATAGCCTTTCCTCG
AATAAATAACATAAGTTTTTGGCTTCTTCCTCCTGCGTTAATAATATTGTTATTATCTTCCTTAGCTGAAAGAGGAGCAG
GAACTGGATGAACAGTTTATCCCCCTTTATCTAATTATTTATTTCACGGAGGAATATCAGTAGATTTAACTATTTTTTCT
CTTCACATAGCTGGAATCTCTTCTATTTTAGGTGCAATTAATTTTATCACAACTATTTTAAATATGCGAATAAATTTAGT
ATCATTTGAACGTTTACCATTATTTGTTTGATCTGTACTTATTACAGCAGTTTTATTACTTCTTTCATTACCTGTATTAG
CTGGTGCTATTACAATATTACTTACTGATCGAAATTACAATACATCTTTTTTTGATCCTGCAGGAGGAGGTGA
>OPILI151-10|Opiliones|COI-5P|HQ968008
GACTATATATATAATTCTAGGAGTTTGAGCAGCAATAGTAGGCTCGGCTCTAAGTATTCTTATCCGAACAGAATTAGGAC
AACCTGGTTCATTGATGAATGATGACCAAATCTACAATGTAGTAGTTACTTCCCATGCTTTTGTAATAATTTTTTTTATA
GTTATACCAATCATAATAGGAAGTTTTGGTAACTGGTTAGTACCTCTAATATTAGGGGCCCCAGATATAGCTTTCCCACG
ACTAAATAATATGAGATTTTGATTACTTCCACCTTCATTCGTTCTTCTAATTAGATCCACAATAGTAGAAAGAGGAGCTG
GCACAGGATGAACTGTATACCCCCCTCTTTCAAGTAATACAGCCCACAGAGGGCCCTCAGTTGATCTAACCATCTTCTCA
TTACACCTAGCAGGAATCTCATCAATTTTAGGGGCTATCAATTTCATTACTACGGTAATAAATATACGAACAAAGGGGAT
AGTCTATGAACGTCTTCCATTATTTGTTTGATCAATTATTATCACTGCTGTACTACTGCTATTATCCCTCCCAGTTCTAG
CAGGTGCTATTACTATACTACTAACAGATCGTAATTTCAATACCTCCTTTTTTGACCCGGCTGGGGGAGGAGATCCTATT
CTATACCAACACCTATTT
>SPICR936-11|Araneae|COI-5P
AACTTTATATTTATTATTAGGTGTTTGGTCGGCAATAATAGGAACTGCTATATCAGTGTTAATTCGAATAGAATTAGGTA
ATCCTGGGAGTTTATTAGGTGATGATCATTTATATAATGTTATAGTTACTGCTCATGCTTTTGTGATGATTTTTTTTATG
GTAATACCAATTCTTATTGGTGGATTTGGAAATTGGTTGGTTCCTTTAATATTAGGGGCTCCTGATATATCTTTTCCTCG
TATAAATAATCTTTCTTTTTGATTATTACCTCCTTCTTTATTTTTGTTGTGTATATCTTCTATAGTGGAGATAGGGGTAG
GGGCTGGTTGAACTGTTTATCCTCCTTTAGCGTCGAGAATAGGTCATACTGGTAGTTCTATAGATTTTGCTATTTTTTCT
CTTCATTTAGCTGGGGCTTCTTCTATTATAGGGGCTGTGAATTTTATTTCTACTATTATTAATATACGAATATTGGGAAT
ATCAATAGAAAAGGTTCCTTTATTTGTTTGATCAGTTTTAATTACAGCTGTTTTATTATTGCTTTCTTTACCTGTTTTAG
CAGGTGCTATTACTATATTATTAACTGATCGAAATTTTAATACTTCTTTTTTTGATCCAGCAGGTGGAGGGGATCCTATT
CTGTTTCAACATTTATTT
>MYMCC177-11|Tydeidae|COI-5P|JX838331
AACAATATACTTTATTTTTGGAATATGATCTGGAATCATAGGAGCTTCTATAAGAGTAATAATCCGAATAAAATTATCTC
ATATAACTTTATTTTCTCAAAATGATCAGATATATAATGTATTAGTTACCTCACATGCCTTTGTAATAATTTTTTTTATG
GTTATACCTATTATGATCGGAGGGTTCGGTAATTGGTTAGTTCCAATTTTCTTAGGAACACCTGATATAGCTTTTCCCCG
AATAAATAATATAAGTTTTTGACTTCTTCCACCATCCCTATCAATATTAATATTTTCATCCTTAGTAGATACTGGGGCAG
GAACAGGATGAACAGTTTACCCTCCTTTGTCATCTCAATCATTTCATATAAATGGTTCAGTAGACCTAACTATTTTTTCT
CTTCATTTAGCGGGAGTATCATCTATTTTAGGAGCAGTAAATTTTATTACAACTATTTTAAATATGCGTTCAAAATTAAT
AAAATTCGAACGAATTCCTCTTTTCATTTGATCAATTTTTATTACTACAATTTTACTACTTATTTCATTACCAGTACTAG
CAGGAGCTATTACAATACTATTGACCGATCGAAACTTTAATACAACCTTTTTCGATCCAGCAGGGGGAGGAGACCCAATT
TTATACCAACATTTATTT
>TURAR1680-11|Araneae|COI-5P
GACTTTATATTTAATTTTTGGAGCTTGGGCTGCTATGGTTGGAACTGCAATAAGAGTTTTAATTCGAGGAGAGTTAGGTC
AACCTGGTAGTTTAATTGGAGATGATCAATTATATAATGTTGTTGTTACTGCTCATGCTTTTATTATAATTTTTTTTATG
GTAATACCTATTTTGATTGGGGGGTTTGGGAATTGATTAGTTCCTTTAATATTAGGGGCGCCAGATATGGCTTTTCCTCG
TATAAATAATTTAAGATTTTGACTTTTACCACCATCATTAATATTATTATTTATTTCTTCTATGGTAGAAATAGGTGTAG
GAGCTGGTTGAACTATTTATCCTCCTTTAGCTTCATTAATAGGACATATGGGTAGATCGGTTGATTTTGCTATTTTTTCT
TTACATTTAGCTGGAGCTTCTTCTATTATAGGTGCTGTTAATTTTATTTCTACTATTGTTAATATACGGTCTCCTGGAAT
AACTATAGAGAAAGTTCCTTTGTTTGTATGATCTGTATTAATTACGGCTATTTTATTATTATTATCTTTGCCGGTCTTAG
CTGGAGCTATTACAATATTATTAACTGACCGAAATTTTAATACTTCTTTTTTTGATCCTGCTGGAGGAGGAGATCCAATT
TTATTTCAACATTTGTTT
>CHACB1185-10|Camisiahorrida|COI-5P|HM907260
CACTCTTTACTTTATTTTTGGGACTTGAGCTGGTCTGGTTGGGTCGGCTTTGAGAGCTTTAATTCGCCTTGAGTTAGGAC
AACCTGGTTCCCTCTTAGATAATGATCAAATTTACAACACTATCGTAACAGCTCACGCTTTTGTAATAATTTTTTTTATA
GTAATGCCTGTCATAATTGGAGGTTTCGGGAATTGGCTTGTCCCCATAATAATCGGAGCTCAAGACATGGCCTTTCCACG
TATAAATAACATAAGATTCTGGTTACTTCCCCCGTCTCTAACCCTTCTTTCAGCTTCAGCTTTTGCAGGAATAGGAGCAG
GGACCGGATGAACCGTTTATCCACCGTTAGCGGGTACTATGTTTCACTCAGGAATCTCGGTAGATCTCGCAATTTTTAGT
TTGCACTTGGCTGGTGCCTCTTCTATTTTAGGAGCTATCAATTTCATTACTACTATCATAAACATACGATCCTCTGCCAT
AAGAATGGACGCTATTCCATTATTCGTGTGATCTGTCTTAATCACGGCAGTTCTTCTATTACTTTCATTGCCGGTATTAG
CAGGCGCAATTACAATATTATTAACGGACCGAAATTTTAACACTTCATTTTTTGACCCTACTGGTGGAGGGGATCCTATT
CTCTATCAACATTTATTT
>ARONT239-09|Megalepthyphantesnebulosus|COI-5P|GU682719
AACTTTATATTTTATTTTTGGTGCATGAGCTGCTATGGTAGGAACTGCTATAAGAGTATTGATTCGAATTGAATTAGGAC
AAACTGGAAGTATATTAGGGGATGATCAGTTATATAATGTTATTGTTACTGCCCATGCTTTTGTTATAATTTTTTTTATG
GTTATGCCAATTTTAATTGGGGGTTTTGGTAATTGGCTAGTTCCGTTAATACTTGGGGCTCCAGATATAGCGTTCCCTCG
GATAAATAATTTAAGTTTTTGGCTGTTGCCTCCTTCGTTAATATTATTATTTATCTCAAGAATAGTGGAGATAGGAGTGG
GATCTGGATGAACTGTTTATCCTCCTTTGGCTTCTTTAGAAGGGCATGCGGGAAGATCTGTAGATTTTGCTATTTTCTCT
CTTCATTTAGCTGGGGCTTCTTCTATTATAGGGGCAATTAATTTTATTTCAACAATTCTTAATATGCGAGGATGTGGTAT
TTCTATAGAAAAGGTGCCTTTGTTTGTATGATCCGTTTTAATTACAGCTGTTCTTTTACTTTTATCTTTACCTGTGTTGG
CTGGGGCAATTACTATACTATTGACTGATCGAAATTTTAATACATCTTTTTTTGACCCAGCTGGAGGTGGGGATCCTGTG
TTATTTCAACATTTATTT
>BBUSA1295-10|Araneae|COI-5P|HQ930983
GAGTTTATATTTAGTATTTGGAGCTTGATCTGCTATAGTTGGAACAGCTATAAGAGTATTAATTCGGATAGAATTAGGTC
AAGTTGGTAGATTTTTAGGTGATGATCAAATTTATAATGTTATTGTAACTGCACATGCATTTGTTATGATTTTTTTTATA
GTAATACCTATATTAATTGGAGGATTTGGTAATTGATTAGTTCCTTTAATATTAGGAGCACCAGATATGGCATTTCCTCG
AATAAATAATTTAAGTTTTTGATTATTACCTCCTTCATTAATATTATTATTTATTTCTTCTATAGTTGAAATAGGAGTAG
GTACTGGATGAACTGTTTATCCTCCTTTATCTTCTATTTCTGGTCATGGGGGTAGTGCTGTGGATTTTGCTATTTTTTCT
TTACATTTAGCTGGAGCTTCTTCTATTATAGGAGCAATTAATTTTATTTGTACTGTTATTAATATACGTTCAATTAGAAT
ATCTTTAGATAAAATTCCTTTATTTGTATGATCGGTTGTAATTACTGCTGTATTGTTATTGTTATCTTTACCGGTTTTGG
CAGGTGCTATTACAATATTATTAACTGATCGTAATTTTAATACTTCTTTTTTTGACCCGGCTGGAGGGGGAGATCCTATT
TTATTTCAACATTTATTT
>MAPTH160-13|Ixodida|COI-5P
GACAATATACTTAATTTTTGGAGCATGATCCGGAATACTAGGATTAAGAATAAGAATATTAATCCGCATAGAATTAGGTC
AACCAGGAACTTTAATTGGAAACGATCAAATTTATAATGTAATTGTAACAGCACATGCATTTATTATAATTTTTTTTATA
GTTATACCAATTATAATCGGAGGATTTGGAAATTGATTAGTTCCTATTATACTAGGAGCTCCAGATATAGCATTTCCACG
AATAAATAATATAAGATTTTGGTTACTTCCTCCTTCTCTATTTCTACTAATTAATTCTTCATTAATCGAATCAGGAGCAG
GTACAGGGTGAACAGTTTACCCCCCCTTATCATCAAATTTATCACACTACGGACCATCAGTAGATTTAGCTATTTTTTCT
CTGCATCTTGCAGGTGCTTCTTCAATTTTAGGTGCAATCAATTTCATTACAACTATTGTAAATATACGATCCATTGGAAT
AACAATAGAACGAATACCATTATTTGTATGATCTGTTTTAATTACTGCAATTTTATTATTATTATCTTTACCAGTCTTAG
CTGGCGCAATTACAATATTATTAACTGATCGAAACTTTAATACATCATTCTTTGACCCTTCAGGAGGAGGTGACCCAATT
CTATATCAACATTTATTT
>CNPAI065-13|Trombidiformes|COI-5P
AACTATATATTTTGGTTTGGGGATTTGATCAGCTATACTAGGAACATCATTAAGAAATATTATTCGTTTAGAGCTAAACC
AACCCGGATCAATATTAGAAAACGACCAAATTTATAATTCAATTGTTACAGCTCACGCTTTTATTATAATTTTCTTTATA
GTTATACCAACTATAATCGGTGGTTTTGGAAACTGACTAATTCCTTTAATAATAATAACACCAGATATAGCTTTTCCCCG
TATAAATAATATAAGATTCTGATTACTTTTATCATCATTAATATTATTAATTTCATCTATACTATCTTCTCAAGGAAGAG
GAACAGGATGAACATTATACCCCCCTTTATCAAACCAAATTTCTCATTCAGGCTCCTCAGTTGATCTGACCATTATATCA
CTACATTTAGCAGGTATTTCTTCAATCATAAGATCTTTAAACTTCATTGTTACTATTTTAAACATAAAACCTAATACAAT
GATATTAGAACATGTACCATTATTCGCTTGAAGTGTTCTTATTACTACAATCCTATTATTAATAGCTTTACCAGTTTTAG
CAGGAGCCATCACAATACTTTTAACAGACCGAAATTTCAACACATCATTCTTTGATCCTAGAGGAGGGG
>SPIEU621-10|Araneae|COI-5P|HQ975242
AAGTTTATATTTTGTATTTGGGGCTTGGTCTGCGATAGTTGGAACGGCAATAAGAGTATTAATTCGAGTTGAGTTAGGTC
AAGTTGGTAGTTTGTTAGGAGATGACCAATTATATAATGTAATTGTTACGGCTCACGCTTTTGTTATAATTTTTTTTATA
GTGATACCAATTTTAATTGGGGGATTTGGTAATTGGTTAGTTCCTTTAATATTAGGGGCTCCAGATATAGCTTTCCCTCG
GATAAATAATTTGAGATTTTGACTTTTACCCCCCTCTTTATTTTTATTGTTTATTTCAAGTATAGATGAGATAGGGGTAG
GGGCAGGTTGGACAGTTTATCCTCCTCTTTCTTCATTAGATGGGCATTCGGGGAGTTCAGTGGATTTTGCTATTTTTTCT
TTACATTTAGCTGGGGCATCTTCTATTATGGGGGCTATTAATTTTATTTCTACTATTTTAAATATACGAGGGTATGGGAT
AAGCATAGATAGGGTTCCTTTATTTGTTTGGTCTGTATTAATTACGGCTGTTCTTTTATTGTTATCTTTGCCAGTGTTAG
CAGGGGCGATTACGATGTTGTTAACAGATCGAAATTTCAATACATCATTTTTTGATCCTGCTGGAGGGGGGGATCCTGTT
TTGTTTCAACACTTATTT
>GBCH7730-13|Parasitidae|COI-5P|FJ577981
TAATTTTTGCAGCTTGAGCTGGTATACTAGGAACAGCTTTAAGAATAATTATTCGAACTGAACTAGGCCAACCAGGCTCT
TTAATTAGAGACGACCAAATCTATAATACTGTTGTCACAGCCCATGCTTTTATCATAATTTTTTTTATAGTAATACCAGC
CTTAATTGGAGGCTTCGGCAACTGACTAACTCCTCTTATAATTTCTGCTCCAGACATGGCATTCCCCCGAATAAATAATA
TAAGATTTTGGCTTTTACCTCCCTCCTTAATTCTCCTATTAAGATCTTCTATGGTAGAATCAGGAGCCGGAACAGGTTGA
ACCGTATACCCTCCTTTAGCTAGCAATATCTCTCACAGGGGGAGGTCTGTAGATCTGGCAATTTTTTCTTTACACCTAGC
AGGTGTTTCTTCCATTTTAGGGTCCATTAATTTTATTACAACCATCATAAACATACGACCTAAAAGAATACATATAGAGC
AAGTTCCTCTATTTGTTTGATCCGTTTTAATTACTACTATTCTATTATTACTTTCTCTACCTGTATTAGCAGGGGCTATC
ACAATACTTCTTACTGATCGTAATTTTAATACCTCTTTTTTTGACCCTAGAGGAGGCGGAGACCCTATTTTATACCAACA
TTTA
>CNGIB576-12|Trombidiformes|COI-5P
AACTATATATTTTATATTCAGTCTATTTTCAGGTTTAATTGGAGCTTCTATAAGTATTATTATTCGTATAGAATTAATAC
AGCCTGGTTCATTAATTCAAAATGATTTTTTATACAATTCTTTAGTAACAAGACATGCTATAATTATAATTTTTTTTATA
GTTATACCAGCTATAATTGGAGGATTTGGAAATTGATTAATTCCAATTATAATAAATAAATTAGACATATGTTATCCTCG
ATTAAATAATATAAGATTTTGATTATTAATCCCTTCTATTTTTCTTATATTAGCTTCTTCTACAAACAATATTTTAAATG
GAGTAGGTTGAACAATATACCCTCCTTTAACAAGTTTCATATTTAACACTAGTTCCTCTATTGAGATAATAATTTTTTCA
TTACATATTGCAGGAGTTTCTTCTATTATAAGAGCTATTAATTTTATTACAACTATTTTAAATTTAAAAAATATTAACTT
AAGAATTAATACTCTTCCTTTATTTTCAATTTCAATTTTAATTACAACTTTTTTATTATTATTAGCTTTACCAGTATTAG
CTGGAGCTATCACTATAATTATCACAGATCGTAATTTTAATACTTCTTTTTTTGACCCTTCTGGAGG
>CNPPF583-12|Phytoseiidae|COI-5P|KJ163438
CACCCTTTATTTTATTTTTGCTATCTGAGCCGGGGTTCTAGGCACCTCCCTCAGAAACTTAATCCGCACAGAACTCTCTC
AACCCGGATCTATTTTATTAGATGACCAATTGTATAACGTTCTAGTAACCTCTCATGCGTTTATCATAATCTTTTTTATA
GTTATACCTGTAATAATTGGAGGCTTTGGAAATTGACTCATCCCAATTATAATTAATGCCCCTGATATAGCCTTCCCCCG
TATAAACAATATAAGATTTTGACTTCTTCCCCCTTCTTTATTTTTTTTAACAATATCCTCTCTAATTGACACCGGAGCAG
GCACAGGTTGAACAGTATACCCTCCTCTATCTTCTTCTCTTTACCATAGAGGCTCTTCAGTTGATTTCGCAATCTTTAGA
CTTCACATAGCTGGAATCTCCTCAATTATAGGAGCTATTAACTTTATTTCAACTATTTCTAATATACGCCCAAAAAAAAT
AAATTTTGAACAAATCCCATTATTTGCCTGATCAATCCTAATTACAGCCACTCTTCTTCTTTTATCACTACCAGTCCTCG
CAGGAGCTATCACAATACTATTAACTGACCGAAACTTTAACACATCATTTTTTGACCCAAGAGGAGGGGGAGACCCAATC
CTTTATCAACACTTATTC
>OWM046-13|Trombidiformes|COI-5P
CATAAAGATATTGGAACTTTATACTTTGCTTTTGGTGCATGATCAGGAATAATCGGAGCAAGACTAAGAAGTCTTATTCG
ACTAGAATTAGGACAACCAGGAAGATTAATATTTAACGACCAAATCTATAATACTATTGTGACAGCCCATGCTTTTATTA
TAATTTTTTTTATAGTAATACCTATAATAATCGGAGGTTTCGGAAATTGACTTCTTCCTCTAATACTTAGTGCCCCTGAT
ATAGCATTTCCACGAATAAATAATATAAGATTTTGACTTTTACCCCCTTCCATTTCCCTCTTATTGTCTAGATCATTCGC
ATCCATAGGAGCAGGAACAGGATGAACAGTTTACCCACCACTAGCAAGAAATATTGCTCATTCAGGACCTTCAGTAGACT
TAGCTATTTTTTCACTTCACCTAGCAGGAGTCTCCTCTATTTTAGGAGCCATTAATTTTATAGCAACAACCATTAATATA
AAACCTTCATCTATAAAAACTGATAAAATCCCATTATTTGTTTGATCAATTTTTATTACAACCATTCTCCTCCTTCTTTC
ATTACCAGTTTTAGCTGGAGCTATTACTATATTACTAACAGACCGAAACTTTAACACATCATTTTTTGACCCAGCAGGGG
GAGGAGATCCTATTTTATATCAACATTTATTTTGATTTTTTGG
>MASPD880-12|Araneae|COI-5P
GACATTATATTTAATTTTTGGTGCTTGAGCTGCTATAGTGGGAACAGCTATAAGAGTATTGATTCGAATTGAACTAGGAC
AGCCAGGGAGGTTTATAGGTGATGATCAATTGTATAATGTGATTGTTACTGCTCATGCTTTTGTGATAATTTTTTTTATA
GTAATACCAATTTTAATCGGAGGATTTGGAAATTGATTAGTTCCTCTAATATTAGGGGCCCCTGATATAGCTTTTCCTCG
AATAAATAATTTAAGATTCTGATTATTACCCCCATCCTTATTTCTTTTAATTATTTCATCTATAGTAGAGATAGGAGTAG
GGGCTGGGTGAACTGTATACCCCCCTTTAGCTAGACTAGAAGGGCATGCTGGGAGATCAGTTGATTTTGCAATCTTTTCA
TTACACTTAGCTGGAGCTTCTTCAATTATAGGAGCTATTAATTTTATTTCAACTATTTTAAATATACGATTTTATGGAAT
AACAATGGAAAAAGTTCCTTTATTTGTTTGGTCTGTTCTAATTACAGCTGTTCTTCTATTATTATCTTTACCCGTTTTAG
CTGGAGCTATTACGATGTTATTAACAGATCGAAATTTTAATACTTCTTTTTTTGATCCTTCTGGAGGAGGTGACCCAATT
CTATTTCAACACTTGTTT
>ETKS533-13|Araneae|COI-5P
AACTTTATATTTAGTATTTGGAGCTTGATCAGCTATAGTGGGTATAGGGATAAGAGTATTAATTCGAATGGAATTAGGTC
AATGTGGAAGATTAATTGGAGATGATCATATATATAATGTGATTGTAACAGGACATGCTTTTGTAATAATTTTTTTTATA
GTAATACCTGTTATAATTGGAGGATTTGGAAATTGATTAGTACCTTTAATATTAGGTGCTCCAGATATAGCTTTTCCTCG
TATAAATAATTTAAGTTTTTGATTATTACCACCTTCGTTATTTATATTATTTATATCTTCTATAATTGAGATAGGAGTAG
GTAGAGGTTGAACTATTTATCCTCCTTTGACTTCTATTGTAGGATCTTATGGAAGATCTGTAGATTTTGCAATTTTTTCT
CTACATTTAGCAGGTGCTTCATCTATCATAGGAGCTATTAACTTTATTACTACAATCATTAATATGCGTTCTTCTTGAAT
GAGAATAGAAAAAGTTACATTATTTGTTTGGTCCGTTTTTATTACAGCTATTTTATTATTATTATCTTTACCAGTATTAG
CTGGTGCAATTACAATACTTTTAACTGATCGAAATTTTAATACTTCTTTTTTTGATCCTGCAGGAGGGGGTGACCCTGTA
TTATTTCAACATTTATTT
>SSPAA8338-13|Sarcoptiformes|COI-5P
AACTTTATATTTCATTTTTGGGGCTTGAGCAGGCTTACTGGGCTCAGCTTTAAGTGCCTTAATCCGGTTAGAGTTAGGAC
AACCAGGCTCTATGATGGAAAATGATCAAATTTACAACACTATTGTAACGGCACACGCCTTTATTATAATTTTCTTTATA
GTGATACCCGTAATAATTGGAGGCTTCGGGAACTGACTAATTCCTGTAATGATTGGCGCGCAAGACATGGCCTTTCCTCG
TATAAATAATATAAGATTTTGGTTATTACCTCCTTCTCTCACGCTACTTTCAGCCTCCGCTTTCGCTGGGGCTGGGGCTG
GAACAGGCTGAACGGTGTACCCTCCTTTAGCAGATAATATTTTTCATTCCAGAATCTCTGTGGATCTAGCAATTTTTAGT
CTTCACCTAGCAGGTGTGTCATCCATCTTAGGAGCTATTAATTTTATTACTACTATTTTCAACATACGCTCTTCTTCCTT
ATCACTAGATTCTATCCCATTATTTGTATGATCGGTTCTAATTACTGCTGTTCTTCTTCTATTATCTTTGCCCGTTTTAG
CAGGAGCTATCACTATACTCCTAACAGATCGAAATTTTAATACATCATTTT
>LFWM054-10|Pionalongipalpis|COI-5P|JN034757
TACCCTTTACTTTGGGTTTGGAAGATGATCCGGTATATTGGGGGCTAGCATAAGCACTATCATCCGATTAGAATTAGGTC
AACCAGGATCCCTATTAGGAAACGATCAATTTTATAACTGCATTGTGACAGCACACGCCTTTGTAATAATCTTCTTTATG
GTTATACCAATAATAATTGGAGGATTCGGAAATTGACTTGTTCCCCTAATATTAAGAGCACCAGATATAGCCTTTCCCCG
AATAAATAATATAAGCTTCTGACTCCTCCCCCCTTCTATTATTCTTTTAATTACAGGTTCCTTAACCTCAATAGGAGCAG
GGACTGGATGAACTGTTTACCCCCCTTTATCAGGGAATTTAGCACACAGCGGCCCCTCTGTAGACTTAACAATTTTCTCT
CTACACCTAGCAGGAGTATCCTCCATCCTAGGGGCTATCAACTTCATAGCAACAATTTTAAATATAAAACCTAAACATAT
AAAACTTGAACAAATACCCCTATTTGTCTGATCTATTTTCATCACAACAATTCTTCTCCTCTTATCTTTACCAGTCTTAG
CCGGAGCCATTACTATACTCCTTACAGATCGAAATTTTAATACCTCATTCTTTGACCCCGCAGGGGGAGGAGATCCTATT
CTATACCAACACCTATTT
>SPIIZ116-11|Araneae|COI-5P
AACTTTGTATTTAATTTTTGGGGCTTGATCTGCTATAGTAGGTACGGCTATGAGAGTAATAATTCGTGGAGAGTTAGGTC
AACCAGGTAGTTTAATTGGTGATGATCAATTATATAATGTTGTTGTTACGGCTCATGCTTTTGTAATAATTTTTTTTATA
GTAATACCTATTTTAATTGGAGGATTTGGGAATTGATTAGTACCTTTAATATTAGGTGCTCCAGATATAGCTTTTCCTCG
AATGAATAATTTAAGATTTTGATTATTACCACCTTCTTTAATGTTGTTGTTTATTTCTTCTATAGTTGAAATAGGGGTGG
GAGCTGGTTGAACTATTTATCCACCTTTAGCATCTTTGATAGGTCATATAGGAAGTTCTGTGGATTTTGCCATTTTTTCT
TTACATTTAGCTGGGGCTTCTTCTATTATGGGAGCTGTTAATTTTATTACTACAATTATTAATATACGTTCTCCAGGAAT
AACTTTCGAAAAAGTTCCTTTATTTGTTTGGTCGGTTTTGGTAACAGCTGTTTTATTACTTTTATCTTTACCTGTTTTAG
CAGGTGCTATTACAATATTATTAACAGATCGAAATTTTAATACTTCATTTTTTGATCCTGCTGGAGGTGGGGATCCTATT
TTATTTCAACATTTATTT
>SAMIT622-10|Trombidiformes|COI-5P|HQ972964
AACTTTATACTTTGGCTTCGGTAGATGAGCTGGAATACTAGGTGCAAGAATAAGTACCATTATTCGTCTTGAACTAGGTC
AACCAGGCTCACTTTTAGGTAATGATCAAATCTACAACACAATCGTAACTGCTCATGCTTTTGTCATAATCTTTTTCATA
GTTATACCTATAATAATCGGTGGATTCGGAAACTGATTAGTACCTCTAATATTAAGCGCTCCCGACATAGCTTTTCCACG
AATAAATAATATAAGATTCTGACTGTTACCTCCTTCAATTATTCTTTTAATTACAAGCTCTCTAACCGCAATAGGAGCAG
GAACAGGATGAACAGTATATCCTCCCCTCTCAGGGAACTTAGCTCACAGAGGTCCATCCGTGGACTTAACTATTTTTTCT
CTTCACTTAGCTGGTGTATCTTCAATCTTAGGAGCTATTAACTTTATAGCCACAATTTTAAATATAAAACCAAAGCATAT
AAAGCTAGAGCAGATACCTCTCTTTGTTTGATCTATTTTTATCACCACTATTTTATTACTTCTATCACTTCCAGTTCTAG
CTGGAGCTATCACTATACTCTTAACCGATCGAAATTTTAACACCTCATTCTTTGATCCTGCAGGAGGAGGGGACCCGATT
CTTTATCAACACTTATTT
>AAI152-13|Araneae|COI-5P
AACTTTATATTTATTATTTGGTGCGTGGTCAGCTATGGTTGGAACAGCTATAAGAGTGTTAATTCGAATGGAGTTAGGTA
ATTCTGGAAGATTGTTAGGTAATGATCATTTATATAATGTAATTGTTACTGCTCATGCATTTGTTATAATTTTTTTTATA
GTAATACCTATTTTAATTGGTGGATTTGGAAATTGATTGGTTCCTTTAATGTTAGGAGCTCCTGATATATCGTTTCCTCG
AATGAATAATTTATCTTTTTGACTTCTTCCTCCTTCTTTATTTTTGTTGTTTATATCTTCTATGGTTGAAATAGGTGTGG
GTGCTGGTTGAACTGTTTATCCACCTTTAGCTTCTAGAGTGGGTCATATAGGAAGATCTATGGATTTTGCTATTTTTTCT
CTTCATTTAGCAGGTGCTTCTTCTATTATAGGGGCTGTTAATTTTATTTCTACTATTATTAATATACGGACTGTAGGGAT
AACTATGGAAAAGGTACCTTTATTTGTTTGGTCCGTTTTGATTACTGCAATTTTGCTTCTTTTATCTTTACCTGTTTTAG
CGGGGGCTATTACTATATTATTAACTGATCGAAATTTTAATACTTCTTTCTTCGATCCAGCTGGAGGGGGGGATCCAATT
TTATTTCAACATTTATTT
>MYMCB425-11|Cyta|COI-5P|JX836427
AACTTTATATTTTTTATTTGGAATTTGAGCAGCTTTAATAGGAGCCGCTATAAGACTGTTAATTCGATTCGAACTCTCAC
AACCAGGAGGAATAATAGAAAATGATCAAATTTATAATACTATTGTAACTGCCCATGCATTTGTAATAATTTTTTTTATA
GTTATACCAATTATAATTGGAGGATTTGGAAATTGATTAATTCCTCTAATAATTGGAGCTCCTGATATGGCTTTTCCTCG
AATAAACAATATAAGATTTTGACTACTTCCCCCCTCTCTATCCCTTCTTACCCTATCTTCTTTCTCTAACTCAGGAGCCG
GAACTGGTTGAACAGTATACCCTCCTTTATCTTCTGGAACTGGACACATAGGGGCTTCTGTTGACTTAACTATTTTTTCT
CTTCATTTAGCCGGAATTTCTTCAATTTTAGGCGCTATTAATTTTATAACAACTATTTTAAATATGCGAACTGACAAATT
AAAATTTGAGCAAATTCCCTTATTTGTATGATCAATTTTTATTACAGTTCTCCTTCTTCTCTTATCTCTTCCAGTATTAG
CAGGAGCTATTACTATACTATTAACTGATCGAAACTTTAATACTTCCTTCTTTGATCCAATAGGAGGAGGAGACCCAATC
TTATACCAACATTTATTT
>ARONW143-11|Araneae|COI-5P
AACTTTGTATTTAATTTTTGGAGCTTGATCTGCTATAGTTGGTACTGCTATAAGTGTTTTGATTCGAATTGAATTAGGTC
AGCCTGGAAGTTTTTTAGGTGATGATCATTTATATAATGTTATAGTTACAGCGCATGCTTTTATTATAATTTTTTTCATA
GTAATACCTATTTTAATTGGTGGGTTTGGGAATTGATTAATTCCTTTAATATTAGGTGCGCCAGATATAGCTTTTCCTCG
AATAAATAATTTGAGTTTTTGATTATTACCGCCTTCTTTATTTTTGTTGTTTATTTCTTCTATAATTGAAATAGGAGTTG
GGGCGGGATGAACTATTTATCCTCCTTTAGCTTCTAGAATTGGACATTTTGGTAGATCTGTGGATTTTGTAATTTTTTCT
TTACATTTAGCTGGAGCTTCTTCTATTTTGGGGGCGATTAATTTTATTTCTACTATTTTTAATATACGTTTATGGGGAAT
TACTTTTGAGAGGGTTCCTTTATTTGTTTGATCAGTTTTAATTACGGTTGTTTTGTTATTATTATCTCTTCCTGTATTAG
CTGGAGCTATTACAATATTGTTAACTGATCGAAATTTTAATACTTCATTTTTTGATCCAGCTGGAGGTGGGGATCCTATT
TTATTTCAACATTTATTT
>PPELE689-11|Araneae|COI-5P|JN308808
AACTTTATATTTATTATTTGGATGTTGATCTGCTATGGTTGGAACAGCTATGAGTGTATTAATTCGTATAGAATTAGGTC
AAGTAGGTAGATTATTAGGTGATGATCATTTATATAATGTTATTGTTACTGCTCATGCTTTTATTATAATTTTTTTTATA
GTGATGCCTATTTTGATTGGAGGTTTTGGGAATTGGTTAGTGCCTTTAATGTTGGGAGCCCCTGATATGGCATTTCCTCG
AATGAATAACTTAAGTTTTTGGTTATTGCCTCCATCATTAATTATATTATTTGTTTCGTCTATAGTAGAGATAGGGGTAG
GGGCGGGATGGACTGTATATCCCCCATTAGCTTCAGTTGTTGGGCACCCTGGAGGTGCTATAGATTTTGCTATTTTTTCT
TTGCATTTAGCTGGAGCTTCATCTATTATAGGTGCTATTAATTTTATTTCAACTGTAATTAATATGCGAACTTTTTCTAT
GACTATGGAAAAGGTTCCTTTATTTGTTTGATCTGTATTAATTACAGCTGTGTTATTATTATTGTCTTTACCAGTTTTAG
CTGGTGCTATTACTATGTTGTTGACGGATCGAAATTTTAATACTTCATTTTTTGACCCTGCAGGAGGGGGTGATCCTATT
TTATTTCAACATTTATTT
>SAMIT428-10|Trombidiformes|COI-5P|HQ972813
AACTTTATATTTTGGCTTTGGAAGCTGAGCAGGTATGCTGGGAGCAAGAATAAGAACCATTATTCGCCTCGAACTGGGAC
AACCTGGTTCACTTTTAGGAAATGATCAAATCTATAATACAATTGTAACGGCACATGCTTTCGTTATAATCTTTTTTATA
GTAATACCTATAATAATTGGGGGCTTTGGTAACTGATTAGTACCCTTGATATTAAGTGCACCAGATATAGCTTTTCCACG
AATAAATAATATAAGCTTTTGACTTTTACCCCCTTCGATTGTTCTTTTAACAACAAGATCTTTAACCGCAATAGGAGCAG
GAACAGGATGAACAGTTTATCCTCCTTTATCCGGGAACCTGGCTCACAGAGGCCCTTCTGTAGATTTAACTATTTTTTCT
CTTCACTTAGCAGGAGTATCCTCAATTCTAGGAGCAATTAACTTCATAGCTACAATTTTAAATATAAAGCCAAAACATAT
GAAACTAGAACAAATACCTTTATTTGTTTGATCAATTTTTATTACCACTATTCTTTTACTACTTTCCCTTCCTGTTTTAG
CAGGAGCAATCACTATACTTTTAACAGACCGAAATTTTAATACTTCATTTTTTGATCCTGCTGGAGGAGGAGATCCTATT
CTTTACCAACATTTATTT
>SPICA086-10|Araneae|COI-5P|JF884534
GTCGTTGTATTTTATTTTTGGTGCTTGATCAGCTATAGTAGGAACGGCTATAAGAGTTTTAATTCGAATTGAATTAGGTC
AAACAGGAAGAATGTTGGGAGATGACCAGTTGTATAATGTTATTGTTACAGCGCATGCTTTTGTTATAATTTTTTTTATA
GTAATACCTATTTTAATTGGGGGTTTTGGGAACTGATTAGTTCCTTTAATGTTAGGGGCTCCAGATATAGCTTTTCCTCG
TATAAATAATTTAAGATTTTGATTATTACCTCCCTCTTTATTATTATTATTTATTTCGAGAATAGTAGAAATAGGGGTGG
GGGCGGGATGAACCGTGTACCCTCCTCTTGCTTCTTTGGAGGGGCATGCTGGTAATTCTGTTGATTTTGCTATTTTTTCT
TTACATTTAGCTGGGGCTTCTTCTATTATAGGGGCTATTAATTTTATTTCTACTATTATAAATATACGAGGATACGGGAT
GTCTATAGAGAAGGTTCCTCTTTTTGTGTGATCTGTTTTAATTACGGCTGTTTTATTACTTTTATCTCTTCCAGTTTTGG
CAGGTGCAATTACGATATTATTAACAGATCGAAATTTTAATACTTCTTTTTTTGACCCCGCGGGGGGAGGAGATCCTGTT
TTATTTCAACATCTATTT
>CHACB982-10|Dorycranosusacutidens|COI-5P|JX837873
AACCCTTTATTTCATTTTTGGTGCTTGGGCTGGATTTCTAGGATCTGCTTTAAGAGTGTTAATTCGATTGGAGTTAGGAC
AACCTGGCTCTCTTATAGAAAACGATCAAATTTACAATACCATCGTAACAGCCCATGCCTTTGTCATAATCTTTTTTATA
GTCATGCCAGTAATAATTGGAGGGTTCGGGAATTGGCTTGTTCCTTTAATAATCGGAGCTCAGGACATGGCCTTCCCCCG
AATAAATAATATAAGATTTTGGCTACTGCCACCTTCTCTCACATTGCTCTCTCTTTCCGCCTTTGCTGGTGCTGGGGCTG
GGACGGGTTGGACGGTATACCCCCCTCTAGCAGGAAATCTATTTCATTCTGGAATTTCTGTGGACTTAGCTATTTTTAGA
TTACATTTAGCAGGTGCATCCTCAATCTTGGGAGCAATTAATTTCATTACCACAATTTTAAATATACGACTTTCTTTCAT
AACTTTAGAAACACTTCCTCTATTTGTTTGGTCTGTAATAATTACAGCAATCCTTCTATTATTATCTTTACCAGTCCTAG
CTGGTGCAATTACCATGCTATTAACAGATCGAAACTTCAACACTTCTTTTTTTGACCCTGTGGGGGGGGGAGACCCTATT
CTGTATCAACATTTGTTT
>SPICR951-11|Araneae|COI-5P
TACTTTGTATTTGATTTTTGGAGCATGAGCTGCTATGGTTGGAACTGCTATGAGTGTATTGATTCGTATAGAATTAGGAC
AAACAGGAAGATTTTTGGGAAATGATCATATGTATAATGTGATTGTTACAGCACATGCATTTGTTATGATTTTTTTTATA
GTGATGCCTATTATGATTGGTGGTTTTGGAAATTGGTTGGTGCCTTTGATATTGGGGGCTCCAGATATAGCATTTCCTCG
AATGAATAATTTAAGATTTTGATTATTACCTCCTTCTTTATTTTTATTATTTATATCTTCAATAGTTGAGATAGGGGTTG
GAGCTGGTTGGACTGTATATCCTCCTTTAGCGTCTGTTGTAGGTCATAGTGGTAGATCTGTGGATTTTGCTATTTTTTCA
TTACATTTAGCTGGGGCTTCGTCTATTATAGGTGCGATTAATTTTATTTCTACAGTTATTAATATACGGTCAGTAGGAAT
GTCTTTGGATAAAATTCCTTTGTTTGTTTGATCTGTAGTTATTACAGCTGTTTTATTATTATTATCTTTACCTGTTTTAG
CGGGAGCTATTACTATATTATTGACTGATCGAAATTTTAATACATCTTTTTTTGACCCAGCTGGAGGTGGGGATCCTATT
TTATTTCAACATTTATTT
>GENHP836-11|Araneae|COI-5P
AACTTTATATTTTATTTTTGGAGCATGAGCTGCTATAGTAGGAACTGCTATAAGAGTGTTAATTCGAATTGAGTTGGGAC
AAACTGGAAGAATGTTAGGTGATGACCAGTTATATAATGTTATTGTTACTGCACATGCTTTTGTTATAATTTTTTTTATA
GTTATGCCTATTTTAATTGGGGGATTCGGAAATTGGTTAGTGCCTTTAATACTTGGTGCTCCTGATATAGCTTTTCCTCG
AATAAATAATTTAAGATTTTGGCTTTTGCCTCCTTCTTTATTATTATTATTTATTTCAAGTATAGTTGAAATAGGAGTTG
GAGCAGGATGAACAGTGTATCCTCCTCTTGCTTCTTTAGAGGGGCATGCAGGAAGTTCTGTTGATTTTGCTATTTTTTCT
CTTCATTTAGCTGGAGCTTCTTCGATTATAGGAGCAATTAATTTTATCTCCACTATTGTTAATATACGTGGATACGGTGT
CACAATAGAAAAGGTTCCATTGTTTGTATGATCTGTTTTGATTACTGCTGTTCTTTTATTGTTGTCGTTACCTGTTTTAG
CAGGTGCTATTACTATACTTTTAACTGACCGCAATTTTAATACTTCGTTTTTTGATCCTGCGGGTGGAGGGGATCCTGTA
TTATTTCAACATTTATTT
>BBCAN993-10|Araneae|COI-5P|HQ928204
GACTTTGTATTTATTGTTTGGAGCTTGATCTGCTATAGTGGGAACAGCTATAAGAGTAATAATTCGAATTGAATTAGGAC
AACCTGGTAGATTTTTTGGTGATGATCAGTTATATAATGTAGTAGTGACTGCTCACGCTTTTGTAATAATTTTTTTTATA
GTTATACCTATTTTAATTGGTGGTTTTGGAAATTGATTGGTTCCAATAATATTAGGGGCTCCCGATATAGCTTTTCCTCG
AATAAATAATTTAAGTTTTTGGTTGTTACCTCCTTCTTTATTATTGTTATTTATTTCTTCTATAGTAGAAATAGGTGTTG
GAGCGGGATGAACTGTTTACCCTCCTTTATCTTCTTTAGAAGGTCATGCTGGTAGATCGGTTGATTTTGCCATTTTTTCT
TTGCATTTAGCTGGTGCTTCATCAATTATAGGAGCTATTAATTTTATTTCTACTATTTTAAATATACGTTCTTTAGGAAT
AAGATTAGAAAAAATTTCTTTATTTGTTTGATCTGTATTAATTACGGCTGTTTTATTATTATTATCTCTTCCTGTTTTAG
CAGGTGCTATTACTATATTATTAACTGATCGTAATTTTAATACTTCTTTTTTTGACCCTGCAGGAGGAGGAGATCCTATT
TTATTTCAACATTTATTT
>HGM111-11|Sarcoptiformes|COI-5P
AACTATATACTTCATATTTGGGGCTTGGGCTGGTTTCATGGGGTCCGCTCTAAGAATCCTGATTCGAACCGAGTTAGGGC
AACCAGGATCTCTATTAGAAAATGATCAAATCTACAACACTATTGTAACAGCCCACGCCTTTGTAATAATCTTTTTTATA
GTGATACCAGTAATAATTGGTGGATTCGGAAATTGGCTGGTACCCTTAATAATCGGAGCCCCCGACATAGCATTTCCACG
GATAAACAACATAAGGTTCTGATTACTTCCGCCATCCTTATCTTTATTAACCCTTTCATCTTTCACAGGCTATGGAGTTG
GAACAGGTTGGACAGTATACCCCCCCCTGTCAGATAATATTTATCACGCCTCACCTAGAGTTGACCTGGGTATCTTCAGA
CTACATCTAGCAGGAGCTTCTTCCATTCTTGGGGCAATCAATTTCATCACAACTATCATTAATATACGATCTTCAAGCAC
AACAATAGATAACATACCATTATTCGTCTGATCCGTGCTGGTCACGGCAATCCTATTGCTACTATCCCTACCTGTGCTGG
CAGGTGCCATTACAATGCTGCTTACCGATCGAAACTTCAATACCTCATTTTTTGATCCATCTGGGGGAGGGGACCCCATC
CTATACCAACATTTATTT
>UAMIC1394-13|Araneae|COI-5P
AACTTTATATTTTATTTTTGGAGCTTGAGCTGCTATAGTAGGAACTGCTATAAGAGTATTAATTCGAATTGAATTGGGGC
AAACTGGAAGAATATTAGGGGATGACCAATTATATAATGTTATTGTCACTGCTCATGCATTTGTAATAATTTTTTTTATA
GTAATGCCAATTTTAATTGGGGGTTTTGGAAATTGACTAGTCCCTTTAATGTTAGGGGCTCCTGATATGGCATTTCCTCG
AATAAATAATTTGAGATTTTGATTGTTGCCTCCTTCCTTATTTTTATTATTTATTTCTTCAATAGTAGAAATGGGAGTAG
GGGCAGGGTGAACTGTTTATCCCCCTTTATCTTCTTTAGAGGGACATTCAGGTAGTTCTGTAGATTTTGCTATTTTTTCC
CTCCATTTGGCAGGAGCTTCTTCAATTATAGGTGCAATTAATTTTATTTCCACTATTTTAAATATACGTGCTTATGGAAT
TACTATAGAGAAGGTTTCTTTGTTTGTGTGATCTGTTCTTATTACTGCAGTCCTTTTATTATTGTCTTTACCTGTTTTAG
CAGGAGCTATCACCATGTTATTAACTGATCGAAATTTTAATACTTCCTTTTTCGACCCTGCGGGAGGGGGAGACCCTATT
TTATTTCAACATTTATTT
>OWM286-13|Trombidiformes|COI-5P
CATAAAGATATTGGAACACTTTATTTTGCCTTTGGAGCATGATCTGGAATAGTAGGAGCAAGCTTAAGAAGCTTAATCCG
ACTAGAATTAGGACAACCTGGAAGATTATTATTTAATGACCAAGTTTACAACACTATTGTTACAGCCCATGCTTTTATTA
TAATTTTCTTTATAGTCATACCAATGATAATCGGAGGATTTGGAAACTGACTTCTCCCTCTTATATTAAGAGCTCCTGAT
ATAGCTTTTCCACGAATAAACAATATAAGATTCTGACTTTTACCACCTTCTATCAGCCTCCTGTTATCAAGATCATTTAC
TTCTATAGGGGCAGGAACTGGATGAACAGTTTATCCACCATTAGCAAGAAATATTGCTCACTCAGGTCCATCAGTAGACC
TAGCAATTTTTTCTCTTCACTTAGCAGGAGTATCCTCTATTTTAGGGGCTATTAATTTCATAGCAACAACTATTAATATA
AAACCATCCTCAATAAAAACAGATAAAATCCCTCTATTTGTTTGGTCAATCTTTATTACTACTATTCTTCTTCTTCTATC
TCTACCAGTTTTAGCCGGAGCTATCACTATGCTACTAACAGATCGAAACTTTAACACATCATTCTTTGATCCAGCAGGAG
GAGGAGACCCAATTCTATATCAACATTTATTTTGATTTTTTGG
>PSSAF237-10|Pseudoscorpiones|COI-5P|HQ970082
AACTCTTTATTTAATTTTCGGAGTTATTGCTGGTTTTATTGGTCTTTGTTTTAGAATATTAATTCGTCTTCAACTTTTCT
TTCCCGGAGGAGTAATAAATGAACATTCTTATAATATTATCATTACTGCCCATGCTTTAGTAATAATTTTTTTTATAGTA
ATACCAATTATAATTGGAGGTTTTGGAAATTGACTTGTTCCATTAATAATTGGTGCCCCTGATATAGCTTTCCCCCGAAT
AAATAATTTAAGATTTTGACTTCTTCCTCCATCATTTATACTTTTAACTTTTTCTTCTATAATTGAAATAGGATGTGGAG
CAGGGTGAACAATTTATCCACCTCTTACAAATATTTATGCTCATCCAGGAAGATCAGTAGATTATGTAATTTTTTCACTT
CATCTAGCTGGAATTTCTTCAATTTTAGGAGGAGTAAATTTTATTTCTACAATTATTAATATACGAGATCCTTCTCTTTC
ATTTAAAATAATCCCTCTCTTTGTATGATCTGTTTTAGTCACTGTAATTTTAATTTTATTAGCTATGCCTGTTCTTGCAG
GAGCAATTACAATACTTCTTACAGATCGTAATTTTAGAACTTCTTTTTTTGACCCTGCAGGAGGAGGTGATCCTATTTTA
TTTCAACATTTATTT
>SAMIT225-10|Trombidiformes|COI-5P|HM382855
AACTTTATACTTTGCTTTTGGTGCCTGATCAGGTATAGTAGGAGCCAGCTTAAGAAGTCTAATCCGATTAGAACTAGGAC
AACCTGGGAGACTAATATTCAACGATCAAGTATATAATACTATTGTTACAGCACACGCCTTTATCATAATTTTTTTTATA
GTAATACCAATAATAATTGGAGGATTCGGAAACTGATTAGTTCCTCTAATACTTTCAGCCCCAGATATAGCATTCCCTCG
AATGAACAACATAAGATTCTGATTATTACCCCCTTCATTAACACTATTACTATCAAGATCTTTCACTTCAATAGGAGCAG
GAACTGGATGAACAGTTTACCCCCCATTAGCAAGTAACATCGCCCACTCAGGACCCTCAGTAGACTTAGCAATCTTTTCT
CTTCATTTAGCAGGAGTATCTTCAATTCTTGGCGCTATTAACTTCATGGCCACAACCATGAACATAAAGCCTCTTTCTAT
AAAAATCGACAAAATACCTTTATTTGTTTTATCTATTTTCATTACCACAATCCTTCTTCTCCTTTCATTACCAGTATTAG
CAGGAGCCATCACTATATTACTAACAGACCGAAACTTTAACACATCATTTTTCGATCCAGCAGGAGGAGGAGATCCAATC
CTTTATCAACATTTATTC
>CHACA1005-10|Nothrus|COI-5P|HM907070
AACTTTATATTTCATTTTTGGAGCTTGAGCCGGAATACTAGGATCATCACTAAGTGCCATCATCCGGTTAGAATTAGGAC
AACCAGGATCACTACTAGAAAATGATCAGATCTACAATACGATTGTTACTGCTCATGCCTTTGTAATGATTTTCTTCATG
GTTATACCCGTCATAATTGGAGGATTTGGAAATTGACTGGTTCCATTAATAATTGGAGCCCAAGATATAGCTTTTCCACG
TATAAATAATATAAGATTCTGGCTCTTACCACCATCTTTAACCTTTCTAACCGCCTCAGGATTCGCTGGGATAGGAGCTG
GAACAGGATGAACCGTGTATCCACCTCTAGCTGGAAACTTATTTCACTCCGGAATCTCCGTAGATTTAGCAATTTTTAGT
CTTCATTTAGCAGGTGCCTCATCCATTTTAGGAGCAATCAACTTTATTACCACAATCATGAACATACGATCCTCAACAAG
AAGACTGGATTCAATCCCTCTATTTGTATGGTCAGTACTAATTACTGCAGTTTTATTACTACTCTCGCTACCTGTTTTGG
CAGGGGCCATCACAATACTACTGACTGATCGAAACTTCAACACATCTTTCTTTGACCCAACAGGAGGAGGGGATCCTATT
TTATACCAGCATCTATTT
>GBCH3922-09|Raoiellaindica|COI-5P|EU682444
GGATTAATGTATTTATTATTTAGTATTTTTTCTGGTCTTTTGGGTTTAAGATTAAGTGTAATTATTCGATTTGAATTAAT
TCAATCTGGTTCTTTTATTATAAATGATATAATTTATAATAGTTTAATTACTTCTCATGCTATATTAATAATTTTTTTTA
TAGTTATACCTTCTTTAATTGGAGGTTTTGGAAATTTATTAGTTCCATTAATAAATAATAGTTTAGATATAGCTTTTCCT
CGTTTAAATAATATAAGTTTTTGATTAATTTTACCTTCTTTTTTCTTTATAATTCTTTCTATAATTTTAGGAGTTTTAAA
TGGTTCAGGTTGAACAATTTATGCTCCTTTAAGATCAAGAATATTTTTTTCTGGTTTTTCTATCGAAATAATAATTTTTT
CTCTTCATATTGCTGGAATTTCTTCAATTTTAAGTTCTATTAATTTTATCTCAACTATTATTATATTTAAAATAAAATAT
TTTATTTTTTCTTTTATTTCTTTATTTAATTTATCTATTCTTGTTACTTCTTTTTTATTATTACTTTCTTTACCTGTTCT
AGCAGGGGGAATTACTATAATTATTTTTGATCGAAATTTTAATACTAGTTTTTTTGATCCTTTAGGAGGAGGAGATCCGA
TTTTATATCAACAT
>GBCH1401-06|Saltoniaincerta|COI-5P|DQ411355
GGATGGACAGTTTATCCTCCTTTGGCTTCATTAATAGGGCATGCTGGTAGATCGATAGATTTTGCTATTTTTTCTCTTCA
TTTGGCGGGGGCTTCTTCTATTATAGGGGCTATTAATTTTATTTCTACTATTTTAAATATACGTGTAGAGGGGATGAGAA
TGGACAAGGTTCCGTTGTTTGTTTGGTCAGTGTTAGTTACTGCGGTGTTATTGTTGTTGTCGTTGCCTGTTTTAGCTGGG
GCTATCACTATGTTGTTGACAGATCGTAATTTTAATACATCTTTTTTTGACCCTGCGGGTGGAGGGGATCCTATTTTATT
TCAACATTTGTTTTGATTTTTTGGACATCCTGAAGTGTATATTTTAATTTTGCCTGGGTTTGGGATTATTTCTCATGTGA
TTAGTTACTCCGTCGGAAAGCGTGAGCCTTTTGGTAGATTGGGCATGATTTATGCTATAGTAGGGATTGGGGGGATAGGA
TTTGTGGTATGAGCGCATCATATGTTTTCTGTTGGGATGGATGTGGATACTCGAG
>GBCH6392-13|Steganacarusmagnus|COI-5P|JF264116
AATTCGTTTAGAACTTGGACAAATTGGTTCAATTTTATCAAGAGATCAAATTTATAATGTTTCTGTAACTTCTCATGCTT
TTATTATAATCTTTTTTACTGTTATACCTATTATAATTGGAGGTTTTGGAAATTGGATAATCCCTTTAATAATTGGATCT
CAAGATATAGCTTTCCCACGAATGAATAATATAAGTTTTTGGTTTCTTCCTCCTTCTTTACTGTTTCTTATATCTTCTTC
TTTTTGTGGACAAGGAGTGGGCACAGGTTGAACAGTTTATCCTCCCTTGTCTAATATTTTATTTCATTCAGGTTATTCAG
TAGATTTGTCAATTTTTAGTCTTCACATAGCTGGAGCTTCTTCTATTTTAGGGGCTATTAATTTTATCACTACAATTTTA
AATATGAAATCTAGGTTTTTAAGTTATGATTGTATACCTTTATTGATTTGATCTATTTTTGTAACTGCTATTCTTTTGTT
ACTTTCTCTTCCTGTATTAGCAGGAGCAATCACAATGCTTTTAATTGATCGAAATTTTAATACTTCATTTTTTGATCCTT
CAGGTGGAGGTGACCCCATTTTATTTCAACATTTATTT
>FBARB331-11|Araneae|COI-5P
AACTTTATATTTTATTTTTGGGGCGTGAGCTGCAATAGTAGGAACAGCTATAAGAGTTTTAATTCGAATTGAGTTAGGAC
AGACAGGGAGTATATTAGGAGATGACCAGTTGTATAATGTAATTGTCACTGCTCATGCTTTTGTAATAATTTTTTTTATA
GTGATACCTATTTTAATTGGGGGGTTTGGAAATTGGTTAGTTCCTTTAATATTAGGGGCTCCCGACATAGCTTTTCCTCG
TATAAATAATTTAAGTTTTTGGTTATTACCTCCTTCTTTGTTATTATTATTTATTTCATCAATGGCTGAAATGGGGGTAG
GGGCAGGTTGAACTGTTTACCCTCCTCTTTCTTCTTTAGAAGGGCATTCAGGAAGATCTGTTGATTTTGCTATTTTTTCT
CTGCATTTAGCTGGGGCTTCTTCAATTATAGGTGCTATTAATTTTATTTCTACTATTTTAAATATACGAGCTTTTGGTGT
TAGTATAGAAAAGGTTTCTTTGTTTGTATGATCAGTTTTAATTACTGCGGTTTTATTATTATTATCTTTACCTGTTTTAG
CAGGGGCTATTACTATATTGTTGACTGATCGAAATTTTAATACATCTTTTTTTGACCCTGCAGGGGGTGGGGATCCAATT
TTATTTCAACATTTATTT
>BBCAN404-09|Araneae|COI-5P|GU683382
AAGTTTATATTTGGTATTTGGAGCTTGATCTGCTATAGCTGGTACAGCTATAAGATTACTAATTCGAATAGAATTAGGAT
TACCTGGGAGACTTTTAGGAGATGATCAAATTTATAATGTAATTGTTACATCTCATGCTTTCGTGATAATTTTTTTTATA
GTTATACCTATTATAATTGGAGGATTTGGAAATTGATTGGTTCCTTTAATATTAGGAGCTCCTGATATAGCGTTTCCTCG
AATAAATAATTTAAGATTTTGATTATTACCTCCTTCTTTAATATTATTATTTATTTCTTCTATAATTGAAATAGGAGTAG
GAGCAGGATGAACTGTTTATCCTCCTTTATCATCTTTGGATGGGCATAGAGGAAATAGAGTAGATTTTGCTATTTTTTCT
TTACATTTAGCTGGTGCTTCTTCAATTTTGGGGGCAGTAAATTTTATTTCTACTATTATAAATATACGATTATACGGAAT
AAATTTAGATAAAATTTCTTTATTTGTATGATCTGTATTTATTACTGCTATTTTATTATTATTATCATTACCTGTATTAG
CAGGTGCTATTACTATATTATTAACTGATCGAAATTTTAATACTTCTTTTTTTGATCCTGCAGGAGGTGGAGATCCAATT
TTATTTCAACATTTATTT
>BBUSE500-11|Araneae|COI-5P
GACTTTATATTTAATTTTTGGTGCTTGAGCTGCTATAGTGGGAACTGCAATAAGAGTATTAATTCGAATTGAATTGGGAC
AGCCTGGGAGATTTATGGGGGATGACCAGTTATATAATGTGATTGTTACTGCTCATGCTTTCGTGATAATTTTTTTTATA
GTAATACCTATTCTAATTGGGGGATTTGGGAACTGGTTAGTTCCTTTGATGTTAGGGGCTCCAGATATAGCATTTCCTCG
AATGAATAATTTAAGGTTCTGGTTGCTTCCGCCTTCTTTATTTCTTTTGATTGTTTCTTCTATAGTTGAAATAGGTGTGG
GGGCAGGATGAACTGTTTATCCCCCGTTAGCTAGATTGGAGGGTCATGCTGGTAGTTCAGTAGACTTTGCTATTTTTTCT
TTACATTTGGCTGGTGCTTCTTCTATTATGGGGGCTATTAACTTTATTTCTACTATTATTAATATGCGGTTTTATGGAAT
AACTATAGAAAAGGTTCCTTTATTTGTTTGATCTGTTTTGATTACAGCGGTATTGTTACTTTTATCTTTACCTGTTTTAG
CTGGGGCTATTACAATACTGTTAACGGATCGAAATTTTAATACCTCTTTTTTTGATCCTTCAGGAGGAGGAGATCCTATT
TTATTTCAGCATTTATTT
>SPIEU747-10|Araneae|COI-5P|HQ975328
GACGTTATATTTTATTTTTGGATCTTGAGCTGCTATAGTTGGTACAGGGATGAGATTATTGATTCGAACTGAGTTAGGAC
AAGTTGGTAGATTATTAGGTGATGATCAACTATATAATGTTATTGTAACAGCTCATGCATTTGTAATAATTTTTTTTATA
GTTATGCCTATTTTAATTGGGGGTTTTGGAAATTGGTTGGTTCCTTTAATATTAGGGGCACCGGATATAGCGTTTCCTCG
CATAAATAATTTAAGTTTTTGGCTATTACCTCCTTCTTTGTTATTATTATTTATTTCTTCTATAGTAGAAGTTGGAGTGG
GGGCGGGGTGAACAATTTATCCCCCTCTTTCGTCTTTGGAAGGGCATTTTGGTGGATCAGTAGATTTTGCTATTTTTTCT
TTACATTTGGCTGGGGCTTCTTCTATTATAGGAGCTATTAACTTTATTTCTACTATTATTAATATACGGTCATACGGAAT
AACAATAGAGAGGGTGCCATTATTTGTATGATCTGTGTTGATTACAGCTGTATTATTGCTTTTGTCTTTGCCTGTTTTAG
CTGGGGCTATTACTATATTATTAACGGATCGAAATTTTAATACGTCTTTTTTTGACCCGGCAGGGGGGGGGGATCCAATT
TTGTTCCAACATTTGTTT
>SPIAL062-10|Araneae|COI-5P|HQ580567
AAGTTTATATTTTATTTTTGGGGCTTGAGCTGCTATAGTAGGGACAGCAATAAGAGTTCTTATTCGAATTGAACTAGGAC
AAATTGGTAGATTATTGGGTGATGATCAGTTATATAATGTTATTGTTACTGCTCATGCTTTTGTTATAATTTTTTTTATA
GTTATACCTATTTTAATTGGGGGATTTGGAAATTGATTAGTTCCTTTAATATTAGGGGCACCGGATATAGCTTTTCCTCG
AATGAATAATTTAAGATTTTGATTATTACCTCCTTCTTTATTTTTATTATTTATTTCAAGTATAGATGAGATAGGAGTAG
GAGCAGGTTGGACTGTATATCCACCTCTTGCCTCTTTAGAGGGGCATTCTGGAAGTTCAGTGGATTTTGCTATTTTTTCT
TTGCACCTGGCAGGTGCATCATCTATTATGGGGGCTATTAATTTCATTTCTACTATTTTAAATATACGGGGGTATGGAAT
AACAATGGAAAAGGTTCCATTGTTTGTGTGATCTGTTTTAATTACAGCTATTTTGTTACTTCTTTCTCTGCCTGTGTTAG
CAGGGGCGATTACTATACTTCTTACAGATCGAAATTTTAATACATCATTTTTTGATCCATCTGGGGGAGGTGATCCAGTA
TTATTTCAACATTTGTTT
>SPIRU1781-12|Araneae|COI-5P
GAGTTTATATTTTGTTTTTGGGGCATGAGCTGCTATAGTAGGAACTGCAATAAGAGTATTAATTCGAATTGAATTGGGTC
AGATTGGAAGATTATTAGGGGATGATCAATTGTATAATGTTATTGTTACTGCTCATGCTTTTGTTATAATTTTTTTTATA
GTAATACCTATCTTGATTGGGGGGTTTGGGAACTGGTTAGTCCCTTTGATATTAGGTGCTCCGGATATGGCTTTCCCTCG
TATAAATAACTTGAGATTTTGATTGTTGCCTCCTTCCTTATTATTATTATTTATTTCTAGAATAGATGAAATAGGAGTAG
GGGCAGGGTGAACAGTTTATCCTCCTCTTGCTTCTTTAGAGGGTCACTCTGGGAGATCAGTGGATTTTGCTATTTTTTCT
TTGCATTTGGCTGGGGCTTCATCTATTATAGGGGCTATTAATTTTATTTCTACTATTTTGAATATGCGTGGTTATGGGAT
ATCTATAGAAAAAGTTCCTTTATTTGTTTGATCTGTTTTAATTACAGCTGTGTTGTTATTATTATCTTTGCCTGTATTGG
CTGGGGCTATTACGATACTTTTAACAGATCGAAATTTTAACACATCTTTTTTTGACCCTTCTGGGGGAGGGGACCCTGTT
TTATTCCAACATTTATTT
>SSEIB8173-13|Sarcoptiformes|COI-5P
AACTCTATACTTCATCTTTGGAACTTGAGCGGGGTTGATGGGTTCCTCCCTGAGAGCCCTAATCCGATTAGAGCTAGGAC
AACCAGGCTCACTTCTAGATAATGACCAAATCTACAACACAATTGTTACTGCTCACGCCTTCGTCATGATCTTCTTCATA
GTCATGCCCGTCATAATTGGAGGATTCGGGAACTGACTTGTGCCCCTAATAATCGGAGCTCAAGATATAGCGTTCCCCCG
CATGAACAACATAAGATTTTGGCTTCTTCCGCCATCTTTGTGCCTTCTTTCAGCTTCTGCTTTCGCAGGGTTAGGGGTAG
GAACAGGGTGGACCGTATACCCACCCCTAGCTGGAAACCTATTTCACTCCGGATTCTCCGTGGACTTGGCAATCTTCAGG
CTTCATTTAGCTGGTGCCTCATCTATCTTAGGTGCCATTAATTTCATCACTACCATCTTAAACATACGTTCCTCTACCAT
AAGTCTTGATTCAATCCCTCTGTTTGTATGATCGGTTTTAATTACTGCTGTCCTACTTCTCCTAGCTTTACCCGTCTTAG
CTGGAGCTATCACTATACTGCTAACAGACCGAAATTTTAACACAACATTCTTCGACCCGGC
>SSJAF7429-13|Dentizetes|COI-5P
AACTTTATATTTTATTTTTGGGGCATGAGCTGGCTTGTTAGGATCCGCACTTAGAGGATTAATTCGATTAGAATTAGGTC
AACCAGGATCCCTTATAGAAAATGATCAGATTTATAACACCATTGTAACAGCACACGCTTTTGTCATAATTTTTTTTATA
GTGATACCCGTGATAATCGGGGGATTTGGGAATTGGCTTGCTCCTATGATAATCGGAGCTCAAGACATAGCTTTCCCTCG
GATAAATAATATGAGATTTTGACTTCTCCCTCCTTCTTTAGCTCTTCTTTCTTCGTCAGCTTTCGCAGGAATAGGAGCTG
GAACAGGATGAACAGTGTACCCTCCCTTGGCAAGCAATCTGTTTCATTCCGGATTTTCTGTGGATTTGGCTATTTTTAGT
CTTCATTTAGCAGGAGCTTCTTCTATTTTAGGAGCTATCAACTTCATTACAACAATCTTGAATATACGATCTTCTTCAAT
AACCTTAGACTCCATCCCCTTGTTTGTTTGATCAGTTTTGATTACAGCCGTTTTATTATTACTGTCTCTACCAGTTCTAG
CTGGAGCTATCACAATACTATTAACAGATCGAAATTTTAACACCTCGTTTTTTGATCCCTCCGGAGGTGGCGACCC
>ETKS341-13|Araneae|COI-5P
AACTTTGTATTTGATTTTTGGTGCTTGGTCAGCTATAGTTGGTACGGCAATAAGAGTACTAATTCGTATGGAATTAGGGC
AGACTGGTCATTTTTTGGGAAATGATCATTTATATAATGTAGTTGTTACTGCTCATGCTTTTGTTATAATTTTTTTTATA
GTAATACCAATTATGATTGGTGGTTTTGGAAATTGGTTGGTTCCTTTAATATTAGGTGCTCCTGATATAGCTTTTCCTCG
TATGAATAATTTGAGTTTTTGATTATTACCTCCTTCTTTAATATTATTATTTATTTCTTCTATGGCTGAAATAGGAGTTG
GTGCTGGGTGAACTGTTTATCCTCCTTTAGCTTCTGTTGTTGGACATAGTGGAAGTTCAGTTGACTTTGCTATTTTTTCG
TTACATTTAGCTGGGGCTTCTTCAATTATAGGTGCTATTAATTTTATTTCAACTGTTATTAATATACGATCTGTTGAAAT
ATCTATAGATAAAATTTCTTTGTTTGTTTGGTCTGTATTAATTACAGCTGTTTTATTATTATTATCTTTACCTGTATTAG
CAGGTGCTATTACTATATTATTGACTGATCGAAATTTTAATACTTCTTTCTTTGATCCAGCAGGTGGTGGTGATCCTATT
TTATTTCAACATTTATTT
>SSPAC12266-13|Chamobatescuspidatus|COI-5P
ACTCTTTACTTTATTTTTGGAGCATGAGCCGGGTTGCTAGGATCTGCCTTAAGAGGGCTAATCCGTTTAGAACTAGGCCA
ACCAGGATCATTAATAGAAAACGATCAAATTTATAATACTGTAGTGACAGCCCATGCTTTTGTGATAATTTTTTTTATAG
TTATACCTGTAATAATTGGAGGATTCGGAAATTGATTGGTTCCTATAATAATTGGAGCTCAAGATATAGCATTTCCTCGA
ATAAATAACATAAGATTTTGACTTCTTCCTCCTTCTTTAGCTTTACTTTCATCTTCGGCTTTTGCTGGAATAGGAGCAGG
AACTGGTTGAACAGTTTACCCTCCTTTGGCTGGAAATTTATTTCACTCAGGAATTTCTGTTGATTTAGCAATTTTCAGTT
TACATCTAGCAGGAGCTTCATCTATTCTAGGGGCTATTAATTTCATTACCACAATTTTAAATATACGTTCTTCTTCCATA
ACTTTAGATTCAATTCCTTTATTTGTTTGGTCTGTGCTTATTACTGCAGTTCTTCTTCTTTTGTCTTTGCCTGTCTTAGC
AGGAGCAATTACAATACTATTAACAGAT
>JSSEP1133-12|Sarcoptiformes|COI-5P
GACTTTATACTTTATTTTCGGAGCTTGAGCAGGAATTTTGGGCTCTGCCTTAAGAGGGCTAATTCGACTAGAGTTAGGCC
AACCAGGATCTTTACTTGAAAATGATCAAATTTATAACACAATTGTCACAGCTCACGCCTTTGTCATAATCTTTTTCATA
GTGATACCTATCATAATCGGGGGGTTTGGTAATTGACTTGTTCCTATGATAATTGGAGCTCAAGACATGGCTTTCCCCCG
TATAAACAACATGAGATTCTGACTCCTCCCTCCCTCTCTTGCTTTACTGTCTGCTTCTGCTTTTGCTGGTGTTGGAGTAG
GAACAGGATGAACAGTGTATCCCCCGCTATCAGGAAACCTATTTCATTCAGGAATCTCTGTTGACTTAGCTATTTTTAGA
CTTCATTTAGCTGGGGTATCTTCTATCTTAGGAGCAATTAACTTTATCACTACTATCCTAAATATACGTTCCTCTTCAAT
AACACTGGATTCCATCCCACTATTTGTGTGATCTGTCTTAATTACTGCTGTCCTACTCCTCTTATCCCTACCGGTGTTGG
CTGGTGCTATCACGATGCTTTTAACAGACCGAAATTTCAACACCTCTTTCTTCGACCCGTCAGGGGGTGGAGACCCAATC
CTATATCAACATTTATTT
>CHACA1211-10|Rhagidiidae|COI-5P|JX838080
AACATTATACTTTGCCTTCGGGTTATGATCAGCCTTATTAGGAGCATCAATAAGAATCTTAATTCGAATAGAATTAGGAC
AACCGGGATCTATAATACAAAATGATCAAATCTACAACACAATCGTGACAGCTCACGCATTCGTTATAATTTTTTTTATA
GTTATACCAATCATAATTGGAGGATTCGGAAATTGACTAGTTCCAATAATAATTGGAGCTCCCGATATAGCTTTCCCCCG
AATAAATAATATAAGATTTTGATTACTACCCCCATCCCTATCCCTCCTATTAATATCAGCTTTTACAAGAGCTGGTGTTG
GAACAGGATGAACCGTGTATCCTCCCTTATCAAGTAATATAGCTCACCCAGGAGGAGCAGTTGACTTAGGAATCTTTTCT
CTACATTTAGCGGGCATCTCTTCAATTTTAGGAGCCATTAATTTTATAACTACAATTATTAATATACGATCCCCATCTAT
ATCATTTGAACGAATTCCATTATTCGTTTGATCAGTATTCATTACAGCACTACTTCTACTTCTATCTCTACCTGTCCTAG
CGGGAGCAATTACAATACTTCTAACAGATCGAAATTTTAATACTTCATTTTTTGACCCAGCAGGAGGAGGAGATCCAATC
TTATACCAACATTTATTT
>ARONW097-11|Araneae|COI-5P
AACTTTATATTTAATATTTGGAGTATGATCAGCAATATTAGGAACTGCTATAAGTGTATTAATTCGAATAGAATTAGGGA
ATTCTGGAAGTTTATTAGGAGATGATCATTTATATAATGTTATAGTTACTGCACATGCTTTTGTTATGATTTTTTTTATA
GTAATACCAATTCTTATTGGAGGATTTGGAAATTGATTAGTTCCTTTAATATTAGGTGCTCCTGATATGTCGTTTCCTCG
AATAAATAATCTTTCTTTTTGATTGTTACCACCTTCTTTATTTTTATTATCTATATCTTCTATAGTGGAAATAGGAGTTG
GAGCTGGATGAACTGTGTATCCACCTTTAGCATCAAGTATAGGACATACAGGAAGTTCTATGGATTTTGCTATTTTTTCT
CTTCATTTGGCTGGAGCTTCTTCAATTATAGGAGCAGTTAATTTTATTTCTACTATTATTAATATACGTATATTAGGAAT
ATCTATAGAAAAGGTTCCATTATTTGTATGATCGGTATTAATTACTGCTGTATTATTATTATTGTCTTTACCTGTTTTAG
CAGGAGCTATTACTATATTATTAACAGATCGAAATTTTAATACATCTTTTTTTGATCCGGCAGGAGGAGGAGATCCTATT
TTGTTTCAACATTTATTT
>SSPAA8472-13|Trombidiformes|COI-5P
TACTCTCTACTTTATTATAAGAATTTGAAGAGCTTTTTTAGGGGCCTCATTTAGTAGGTTAATTCGATTAGAATTAATAA
TTCCAGGAAATTTATTATTTAATGATCAAATTTATAATTCAATTATTACTTTACATGCTTTTATTATAATTTTTTTTATA
GTTATACCTTTTATAATTGGCGGATTTGGAAATATATTAACTCCTATATTTTTAGGAACTAATGATTTAACATTTCCACG
TCTTAATAATATAAGATTCTGATTATTACCTCCTTCTCTTATTTTATTAATATTAAGATTTTTTATTGGGGATGGAAGAG
GAACAGGTTGAACAATTTATCCTCCCCTTTCTTCTTTAATATATCATTTTTCTAGATCAATAGATTTAGTAATTTTTTCT
TTACATATCGCGGGAGTTTCCTCAATTGCAAGATCTATTAATTTTATTGTTACTATTTTAAATTCTCGAAGAAAATTACT
AATTTTAGAACGAATATCTTTATTTGTTTGAAGAATTTTAATTACAACTATTTTATTATTATTATCACTTCCTGTTTTAG
CTGGAGCTATTACAATACTTTTAATAGATCGTAATTTTAACACTAG
>SPICA901-10|Araneae|COI-5P|JF886068
TACATTATATATAATGTTTGGAGCTTGAAGTGCGGTGGTTGGAACTGCTATAAGATTTTTAATTCGGATTGAATTAGGAC
AATTAGGAAGATTTTTAGGAGATGATCATTTATATAATGTAATTGTTACTGCTCATGCTTTTGTTATAATCTTTTTTATA
GTAATGCCTATTATAATTGGAGGTTTTGGAAATTGGTTGGTTCCTATGATATTAGGGGCACCGGATATGGCATTTCCTCG
AATAAATAATTTAAGATTTTGATTATTACCCCCGTCTTTATTTTTATTATTTATTTCATCAATAGTAGAGATAGGAGTAG
GAGCTGGGTGGACTATTTATCCTCCATTGGCTTCTGTAGTAGGGCATGGTGGGAGTTCTGTTGATTTTGCTATTTTTTCT
TTACATTTAGCAGGGGCATCTTCTATTATGGGGGCTATTAATTTTATTTCAACTATTTTAAATATACGAGTAGCAGGAAT
AAGAATAGAGAAGGTTCCTTTGTTTGTATGATCAGTTTTTATTACTGCAATTTTGTTATTATTATCATTACCAGTTTTAG
CAGGGGCAATTACTATATTATTAACTGATCGGAATTTTAATACTTCGTTTTTTGATCCTGCAGGAGGAGGGGATCCTATT
TTATTTCAGCATTTATTT
>HSYE071-11|Mesostigmata|COI-5P
TACAATTTATTTAATTTTTAGTCTATGATCAGCATCTTTAGGTACTTCTTTAAGAAGAATTATTCGTATTGAATTGGGTC
AACCTGGTAGAATAATTAATGATGATCAAATTTATAATACTATTGTTACTTCTCATGCTTTTGTGATGATTTTTTTTATA
GTTATACCTGCTATAATTGGGGGTTTTGGAAATTGGTTAGTTCCTTTAATGATTTCTGCTCCTGATATAGCTTTTCCTCG
TTTAAATAATATAAGGTTTTGATTATTATTGCCTTCTATAATTTTATTAATTTTTTCATCTTTTGTTGAAAGTGGTGTAG
GTACGGGTTGGACTGTTTATCCTCCTTTATCTAGAAGAATTGCACATAGAGGTGCTTCTGTAGATTTAGCTATTTTTAGT
TTACATTTGGCGGGGATTTCATCTATTTTAAGTTCTATTAATTTTATTACAACGATTTTAAATATACGATCTATTTCTAT
GAAAATAGAAATAATTCCTTTATTTGTTTGGTCAGTTTTTATTACTACTATTTTATTATTATTATCTCTACCTGTTTTAG
CAGGTGCTATTACAATACTTTTAACAGATCGGAATTTTAATACTTCATTTTTTGACCCTAGAGGGGGTGGAGATCCAATT
TTATATCAACACTTATTT
>TURAR422-10|Araneae|COI-5P|HQ982779
GACGTTGTATTTAATTTTTGGAGCTTGATCTGCTATAGTTGGGACTGCTATAAGAGTTTTGATTCGGGTTGAATTAGGTC
AGCCTGGAAGATTTATTGGGGATGATCATCTATATAATGTTGTTGTTACGGCACATGCTTTTGTTATGATTTTTTTTATA
GTTATGCCTATTTTGATTGGTGGATTTGGAAATTGGTTGGTGCCTTTAATATTAGGTGCGCCTGATATGGCTTTTCCTCG
TATAAATAATTTGAGTTTTTGATTATTACCTCCTTCTTTGTTAATGTTATTTATTTCTTCTATGGTTGATATAGGAGTTG
GAGCTGGTTGGACTGTTTATCCTCCTTTGGCGTCTTCTTTTGGTCATGCTGGAAGATCTATGGATTTTGCTATTTTTTCT
TTACATTTGGCAGGGGCTTCTTCTATTATAGGGGCTATTAATTTTATTTCTACTATTTTAAATATACGTTCTGTTGGTAT
AAAAATAGAGAAAGTTCCTTTATTTGTTTGGTCGGTGTTAATTACGGCTATTTTATTGTTGTTATCTTTGCCTGTGTTAG
CGGGGGCTATTACTATATTGTTGACTGATCGAAATTTTAATACATCGTTTTTTGATCCTGCGGGGGGTGGAGATCCTATT
TTGTTTCAACATTTGTTT
>MYMCF706-12|Diapterobates|COI-5P|JX833779
AACTTTATACTTTATTTTTGGAGCTTGAGCTGGGTTACTAGGATCAGCTCTAAGAGGATTAATCCGATTAGAGCTAGGTC
AACCTGGTTCTCTTATAGAAAATGATCAAATTTACAATACTATCGTGACAGCTCATGCCTTCGTAATAATTTTCTTCATA
GTCATACCTGTGATAATTGGAGGGTTTGGAAACTGACTGGTGCCAATAATAATTGGAGCTCAAGATATAGCTTTTCCACG
GATAAACAATATAAGATTTTGACTTTTACCCCCATCCCTAGCTTTACTTTCTTCATCAGCTTTTGCTGGGATAGGGGCAG
GCACAGGATGAACGGTTTACCCCCCCTTAGCAGGGAATCTTTTTCACTCTGGATTCTCTGTAGATTTAGCTATTTTTAGT
TTACATCTAGCAGGTGCTTCTTCGATCTTAGGAGCTATTAATTTCATTACAACAATTTTGAATATACGATCTTCTTCAAT
AACACTAGATTCAATTCCTTTGTTTGTTTGATCCGTACTTATTACCGCTGTCTTATTGTTACTCTCTCTTCCAGTTTTAG
CTGGAGCTATCACAATGCTTTTGACAGACCGAAATTTTAATACCTCATTTTTTGATCCTTCAGGGGGAGGAGACCCCATT
CTTTACCAACATCTTTTC
>SSPAA8357-13|Sarcoptiformes|COI-5P
CACTCTTTACTTTATTTTCGGAACTTGAGCCGGACTAATGGGATCCGCACTAAGGGCTTTAATTCGTTTAGAATTAGGAC
AACCAGGATCTTTAATAGAAAATGATCAAATTTATAATACTATTGTTACAGCTCACGCTTTCGTCATAATTTTTTTTATA
GTGATACCAGTTATGATTGGAGGATTTGGAAATTGATTAATTCCATTAATAATTGGAGCACAAGATATAGCATTTCCACG
AATAAACAATATAAGATTTTGGCTATTACCACCATCTCTAACTCTCCTTTCTGCTTCTGCTTTTGCTGGTATGGGTGCAG
GAACTGGATGAACTGTATATCCCCCTCTCGCTGGTAATTTGTTCCATTCAGGAATTTCAGTAGATTTAGCCATTTTCAGT
CTTCATCTAGCAGGAGCTTCTTCTATCTTAGGAGCCATTAATTTCATTACAACCATTATAAATATGCGATCAGCTACGAT
ATCTCTAGATTCTATTCCTTTATTTGTGTGATCTGTTTTGATCACAGCTGTTTTATTATTACTATCTTTACCAGTATTAG
CAGGTGCTATCACCATACTCCTAACAGATCGAAACTTTAATACTTCATTTTTT
>ARSO424-09|Araneae|COI-5P
GACTTTATATTTATTTTTTGGAGCTTGGTCAGCTATGGTTGGTACTGCAATAAGAGTTTTAATTCGAATAGAGTTAGGTA
ATGTAGGAAGATTATTAGGAAATGATCATTTATATAATGTTATTGTTACAGCTCATGCTTTTGTTATAATTTTTTTTATA
GTTATACCAATTTTAATTGGTGGATTTGGAAATTGATTGGTACCATTAATATTAGGTGCTCCTGATATATCATTTCCTCG
TATGAATAATTTATCTTTTTGATTACTTCCTCCTTCTTTATTTTTATTATTTATATCATCTTTAGTAGAGATAGGTGTAG
GGGCTGGATGAACTGTATATCCTCCTTTAGCATCTAGTGTAGGACATATAGGGAGATCTATAGATTTTGCTATTTTTTCT
CTTCATTTAGCAGGTGCTTCTTCTATTATAGGGGCTGTTAATTTTATTTCTACAATTATTAATATACGAGTAACTGGTAT
ATCTATAGAAAAAGTTCCTTTATTTGTTTGATCTGTTTTAATTACAGCTATTTTGCTTCTTTTATCTTTACCTGTTTTAG
CAGGAGCTATTACTATATTACTTACAGATCGTAATTTTAATACTTCTTTTTTTGACCCTGCAGGAGGGGGGGACCCTATT
TTATTTCAACATTTATTT
>ACMIT045-10|Trombidiformes|COI-5P|HQ919893
CACCCTCTACTTCGCCTTTGGAGCATGATCTGGTATAGTGGGAGCTAGATTAAGAACTCTAATTCGCTTAGAATTAGGAC
AACCAGGAACACTTTTAGGAAGAGATCAAATCTATAATACAATCGTTACAGCGCATGCTTTTGTTATAATCTTCTTTATA
GTTATACCAATAATGATCGGAGGTTTTGGAAATTGATTAGTTCCATTAATAATCAGAGCCCCAGATATAGCTTTTCCACG
AATAAATAACATAAGATTCTGACTTCTTCCTCCATCTTTAACCTTACTACTATCTAGATCCTTTACAGCCATAGGGGCCG
GAACAGGATGAACCGTTTATCCCCCCTTATCAGGAAATCTAGCTCATGCCGGACCATCAGTAGATTTAACCATCTTTTCT
CTTCATTTAGCAGGTATCTCCTCAATTTTAGGAGCTATTAATTTTATAGCAACAATTATTAATATAAAACCAAAAACAAT
AAAAATAGAGCAAATCCCTTTATTTGTTTGATCTATTTTTATTACAGTGATTTTACTACTTTTATCACTACCAGTTCTTG
CAGGAGCTATCACTATATTATTAACAGACCGGAACTTTAATACATCATTTTTTGATCCAGCTGGGGGAGGGGATCCAATT
TTATATCAACATCTATTT
>ARONT421-09|Ozyptilapraticola|COI-5P|GU682923
AACTTTATATTTATTATTTGGTGCTTGATCAGCTATAGTTGGTACTGCAATAAGAGTTTTAATTCGAATGGAATTGGGTA
ATGTAGGAAGATTATTAGGAAATGATCATTTATATAATGTGGTTGTTACAGCTCATGCTTTTGTAATGATTTTTTTTATA
GTAATGCCAATTTTGATTGGGGGTTTTGGGAATTGGTTAGTTCCTTTAATATTAGGTGCTCCTGATATATCTTTTCCTCG
AATAAATAATTTATCTTTTTGACTTCTTCCTCCTTCATTATTTTTATTATTTATATCATCTATAGTTGAAATAGGAGTAG
GAGCAGGATGGACTGTTTATCCTCCTTTGGCTTCTAGTATTGGTCATATAGGAAGATCAATGGATTTTGCTATTTTTTCT
CTTCATTTAGCGGGTGCTTCTTCTATTATAGGGGCTGTCAATTTTATTACTACTATTATTAATATACGAACAATTGGAAT
GAGAATAGAAAAGGTTCCTTTATTTGTTTGATCAGTATTAATTACAGCTATTTTATTGCTTTTATCATTACCTGTTTTAG
CAGGGGCGATTACAATATTATTAACAGATCGAAATTTTAATACTTCTTTTTTTGACCCTGCTGGTGGGGGGGATCCTATT
TTATTTCAACATTTATTT
>ARONT272-09|Mimetusnotius|COI-5P|GU682725
GACTTTATATTTGGTTTTTGGAGCTTGGGCTGCTATGGTTGGGACGGCTATAAGAGTATTAATTCGGACAGAGCTTGGTC
AGGCAGGCTCTTTTTTAGGGGATGATCAGTTATATAATGTAATTGTAACAGCTCATGCTTTTGTAATAATTTTTTTTATA
GTTATACCTATTTTGATTGGGGGGTTTGGTAATTGGTTAGTACCTTTGATGTTAGGGGCTCCTGATATAGCTTTCCCTCG
CATAAATAACTTAAGATTTTGGCTTTTACCTCCATCTTTATTTTTATTGTTTATTTCCTCCATGATTGAGATAGGGGTGG
GGGCAGGATGAACTGTTTATCCTCCTTTAGCTTCTTTAGAAGGGCATTCTGGAAGAGCAGTAGATTTTGCTATTTTTTCT
CTTCATTTGGCTGGAGCTTCATCTATTATAGGGGCTATTAATTTTATTTCTACTATTTTAAATATACGAGGCTATGGAAT
AAGAATGGAGAAGGTTCCTTTGTTTGTATGGTCTGTGTTAATTACTGCTGTTCTTTTACTTTTGTCTTTGCCTGTTTTAG
CGGGGGCAATCACAATACTTTTAACTGATCGTAATTTTAATACTTCTTTCTTTGATCCTGCAGGAGGGGGGGATCCTATT
TTATTTCAACATTTATTT
>CNSLK070-12|Trombidiformes|COI-5P
TACACTATATTTTATTTTTGGATTTTGATCAGGATTATTAGGTTCTTCTATAAGAATTATTATTCGTATAAAGCTTTCTA
ATCCTGGTTTTATAGGGCAAAACGACCAAATTTATAATGTCACAGTTACTGCTCATGCATTTGTGATAATTTTTTTTATA
GTGATACCAATTATAATTGGGGGGTTTGGTAATTGATTGATTCCTGTTATAATTGGAGCTCCAGATATGGCTTTCCCACG
AATAAATAATATAAGATTTTGACTATTACCTCCTTCTATTTTAATGTTGATAATATCATTTTTTGCTGAAAATGGGGCAG
GAACTGGTTGGACTGTGTACCCTCCTTTGTCTAGTTATTTATTTCATGGGGGTATTTCTGTTGATTTAACAATTTTTTCT
TTACATATAGCTGGCATATCTTCTATTTTAGGTGCTATTAATTTTATTACAACTATTCTGAACATACGAATAAAAATAAT
AACTTTTGAACGTTTACCTTTATTTGTATGATCAGTATTAATTACAGCTTTTCTATTATTATTATCTCTTCCAGTTTTAG
CTGGTGCTATTACTATATTATTGACAGATCGAAATTTTAATACTTCTTTTTTTGATCCTGCTGGAGGGGG
>SPICA1877-11|Araneae|COI-5P|JN309673
GACATTATATTTGATTTTTGGAGCTTGAGCTGCTATAGTAGGGACTGCAATAAGTGTTTTAATTCGAATGGAGTTAGGTC
AAGTTGGTAGTTTTTTGGGAAATGATCATTTATATAATGTAATTGTTACTGCTCATGCGTTTGTAATAATTTTTTTTATA
GTAATGCCTATTTTAATTGGTGGTTTTGGGAATTGATTAGTTCCATTAATATTAGGAGCTCCAGATATGGCATTCCCTCG
GATAAATAATCTTAGTTTTTGATTATTACCCCCATCATTAATATTATTATTTATTTCATCTATAGTTGAAATAGGGGTAG
GTACTGGATGAACTGTTTATCCTCCTTTAGCATCAACAGTTGGTCATGCAGGAAGTGCAGTTGATTTTGCAATTTTTTCT
TTACATTTAGCTGGGGCATCTTCTATTATAGGATCAATTAATTTTATTTCTACTATTATTAATATACGATCAATGGGAAT
AGGGATAGATAAAATTTCTTTATTTGTATGATCAGTAATAATTACTACAGTACTATTATTATTGTCTCTTCCTGTTTTAG
CTGGAGCTATTACTATACTTTTAACTGATCGAAATTTTAATACATCTTTCTTTGATCCTGCAGGAGGAGGAGATCCTATT
TTATTTCAACATTTATTT
>SPICA501-10|Araneae|COI-5P|JF885689
TTCTTTATATTTAATTTTTGGTATTTGAGCGGCATTAATTGGAACTGCTATAAGAGTATTAATTCGAATTGAGTTAGGTC
AATCTGGTAGATTTTTAGGTGATGATCATTTATATAATGTAATTGTTACTGCTCATGCTTTTGTTATAATTTTTTTTATA
GTAATACCTATTATAATTGGTGGTTTTGGGAATTGATTAATTCCTTTAATATTAGGATCTCCTGATATAGCATTCCCACG
TATAAATAATTTAAGATTTTGATTGTTACCTCCTTCTTTATTATTATTGTTTATTTCGTCTATAGTAGACGTTGGGGTGG
GGGCAGGATGAACTATTTACCCTCCTTTGTCATCTGTAATAGGTCATTCAAGAGGATCTATAGATTTTACTATTTTTTCT
CTTCATTTGGCTGGTGCTTCATCCATTATAGGAGCTATTAATTTTATTAGAACTATTATTAATATACGTCCTGTTGGTAT
AGGAATAGAAAAAGTTTCTTTATTTATTTGGTCTGTATTAATTACAGCAGTGTTATTACTTCTATCTTTACCTGTGTTAG
CAGGTGCTATTACTATATTATTAACTGATCGAAATTTTAATACATCTTTTTTTGACCCAGCTGGAGGAGGGGATCCTATT
TTATTTCAACATTTATTT
>MASPD1040-12|Araneae|COI-5P
AACTTTATATTTAATTTTTGGAGCTTGAGCTGCTATAGTAGGAACTGCAATAAGAGTATTAATTCGAATAGAATTAGGAC
AAACAGGAAGTTTTTTGGGTAATGAACATTTGTATAATGTTATTGTTACTGCTCATGCATTTGTTATAATTTTTTTTATA
GTTATACCGATTTTGATCGGAGGATTTGGAAATTGATTGGTTCCTTTAATATTAGGGGCTCCTGATATAGCTTTTCCTCG
AATAAATAATTTGAGATTTTGATTGCTTCCACCTTCTCTAATGTTGTTATTTATTTCTTCTATAGCTGAAATAGGAGTAG
GAGCAGGATGAACTGTATATCCTCCTTTGGCATCTGTAGTAGGTCATAATGGAAGATCTGTGGATTTTGCTATTTTTTCT
TTACATTTAGCGGGAGCTTCTTCAATTATAGGAGCTATTAATTTTATTTCCACTGTTATTAATATGCGTTCGGTAGGTAT
ATCAATAGATAAGGTTCCTTTATTTGTTTGGTCGGTTGTAATTACTGCTGTGTTATTGTTATTATCTTTGCCTGTATTAG
CAGGAGCTATCACTATATTGTTAACTGATCGAAATTTTAATACTTCTTTCTTTGATCCTGCAGGAGGTGGAGATCCTATT
TTATTTCAACATTTGTTT
>GBCH6654-13|Platynothruspeltifer|COI-5P|JF263854
CTGGTTCACTACTAGACAACGACCAAATTTATAACACCATTGTTACAGCCCACGCTTTTGTAATAATTTTTTTCATAGTC
ATGCCTGTAATAATTGGTGGGTTTGGAAATTGATTAGTTCCGTTAATAATTGGAGCTCAAGATATGGCTTTCCCTCGTAT
AAATAATATGAGATTCTGGCTCCTTCCTCCATCCCTATGTCTCCTTTCAGCATCAGCCTTTGCTGGGCTAGGAGTGGGAA
CTGGGTGAACTGTCTACCCCCCTCTAGCCGGAAACCTCTTCCACTCAGGATTTTCCGTAGATCTTGCAATCTTTAGTCTC
CACTTAGCAGGTGCCTCCTCCATTCTTGGAGCTATCAATTTCATCACCACAATCTTAAACATACGATCATCCACAATAAG
CTTAGACTCCATCCCACTATTCGTTTGATCAGTTCTAATTACCGCAGTCTTGTTATTACTGGCTTTACCGGTGTTGGCTG
GAGCCATTACAATACTCTTAACAGACCGAAACTTCAATACAACATTCTTCGACCCAGCGGGTGGGGGGGACCCGATCT
>PMWMC062-07|Trombidiformes|COI-5P
AACCCTTTATTTTGCACTAAGAGCATGAGCAGGAATACTAGGAACAAGTTTAAGAACAATTATTCGATTAGAATTAGGCC
AACCCGGAAGACTTTTAGCAAATGATCAAGTTTACAACGCTATTGTCACAGCACATGCATTTGTTATAATTTTTTTTATA
GTTATGCCTATAATAATTGGAGGCTTCGGAAATTGATTAGTACCATTAATGCTAAGATCTCCCGATATAGCATTTCCACG
AATAAATAATATAAGTTTTTGACTTCTTCCCCCCTCACTTACTTTATTACTATCAAGCTCTCTTATATCAATAAGAGCTG
GGACAGGATGAACAGTGTACCCCCCTCTCTCAAGAAATTTAGCCCACAGAGGCCCAGCAGTTGATTTAACAATTTTTTCT
CTACATTTAGCAGGAGTTTCATCAATTTTAGGAGCAATTAACTTTTTAGCCACTATTTGTAACATAAAACCAAAAAATAT
ACTTACAGATCAAATTCCTTTATTTGTCTGATCAATTTTGGTTACAGCTATTTTATTGCTATTATCTTTACCTGTTTTAG
CAGGAGCCATCACTATACTACTAACAGACCGAAACTTTAATACCTCATTTTTCGACCCAGCAGGAGGAGGAGATCCAATT
CTATACCAACATTTATTT
>MBIOI1438-13|Arachnida|COI-5P
AACTATATATTTTTTATTTAGATTATTTTCAGGATTAATAGGTACTTCTATAAGAATTATTATTCGTTTAGAATTAATAA
CCCCAGGATCTTTAATTCAAAATGATTTTATTTATAACTCAATAGTTACAACACATGCAATAATTATAATTTTTTTTATG
GTTATACCAGCTATAATTGGAGGATTCGGAAATTGACTTATCCCTATAATAATTAATACTGCAGATTTATGTTTTCCACG
AGTTAACAATATAAGATTTTGATTATTAATTCCTTCTTTAATATTAATAATTTCTTCATCAATAAAAAGAGTAATAAATG
GAGTAGGTTGAACTATATATCCCCCATTAACTTCAATTCAATATTTTATATCATCTTCTATTGAAATAATAATTTTTTCT
TTACATATTGCAGGAATTTCTTCAATTGCTAGCTCTATTAATTTTATTTCAACTATTTTAATTATAAAAAATAAAAATTA
TTTTTTAAGAAATTTAACTTTATTTTCTTTATCAATTTTAATTACAACTTTTTTACTGTTATTAGCATTGCCTGTTTTAG
CAGGTGCAATCACAATAATTTTAATAGATCGAA
>MYMCE657-12|Quadroppiaquadricarinata|COI-5P|JX837194
AACTTTATATTTTATCTTAGGTGCTTGAGCAGGACTTTTAGGTTCCGCTTTAAGAGCTTTAATTCGATTGGAACTAGGAC
AACCTGGTTCCATAATAGAAAACGATCAAATCTATAATACTATTGTAACTGCTCACGCTTTCGTTATAATTTTTTTTATA
GTTATACCCATTATAATTGGAGGATTCGGAAATTGACTAGTACCTATAATAATTGGAGCTCAAGACATAGCTTTTCCACG
AATAAATAATATAAGATTTTGATTATTACCTCCATCATTAATTTTCTTAACAACTTCAGCTTTTTCAGGATCTGGGGCTG
GTACTGGTTGAACAGTTTATCCTCCTTTAGCAAATAATATATTTCATTCAGGAATTTCAGTAGATCTTGCAATTTTTAGC
CTTCATTTAGCTGGAGCTTCTTCAATTCTAGGAGCTATCAATTTTATCACTACCATTATAAATATACGATCCTCATCTAT
AAGATTAGACACCATCCCTTTATTCGTTTGATCCGTTCTTTTAACTGCTATTTTATTATTACTTTCTTTACCTGTCTTAG
CTGGAGCTATCACTATACTATTAACGGACCGAAACTTTAATACATCCTTTTTTGACCCTTCAGGAGGTGGAGACCCTATT
CTTTATCAACATTTATTT
>GACAC366-12|Ornithonyssussylviarum|COI-5P|FN646526
AATATTTCACATAGAGGTAAATCAGTTGATCTAGCTATTTTTAGACTTCATATTGCTGGTATTTCTTCTATTTTAGGCTC
TATTAATTTTATTACAACAATTTGTAATATACGTCCTAAATCTATATCAATAGAACATATACCACTTTTTATTTGATCTG
TTCTAATTACAACTATTCTTCTTCTTCTTTCTTTACCAGTTTTAGCTGGAGCTATTACCATATTATTATCAGACCGAAAT
TTTAATACCTCATTTTTTGATCCTAGTGGAGGAGGAGATCCTATTTTATATCAACACCTTTTTTGATTTTTTGGACACCC
TGAAGTATATATTCTTATTCTCCCAGGATTTGGGATTATTTCTCAAATCATTTGTTTTCAAACTAACAAAAAACAACCTT
TTGGTAATCTAGGTATAATTTATGCTATACTTAGAATTGGTATTCTAGGATTTATTGTTTGAGCCCATCATATATTTACT
GTTGGTCTTGACATTGATACACGAGCCTATTTTACTACAGCTACAATAATCATTGCTATTCCTACGGGAATTAAAATTTT
TTCTTGGATTAGCA
>SPIRU1897-12|Araneae|COI-5P
AAGTTTATACTTTATTTTTGGGGCTTGGGCTGCTATAGTGGGGACAGCAATAAGAGTTTTGATTCGAATTGAGTTAGGGC
AAATTGGAAGATTACTAGGGGATGATCAATTATATAATGTTATTGTTACTGCTCATGCTTTTGTTATAATTTTTTTTATA
GTAATGCCTATTTTGATTGGGGGGTTTGGTAATTGACTGGTGCCTTTAATGTTGGGGGCGCCAGATATGGCTTTTCCTCG
GATAAATAATTTAAGATTTTGGTTGTTACCTCCTTCTTTATTATTATTATTTATTTCTAGTATAGATGAAATAGGAGTGG
GAGCAGGGTGAACAGTGTATCCTCCTCTTGCTTCTTTGGAAGGGCATTCTGGTAGTTCAGTAGATTTTGCTATCTTTTCT
TTACATTTAGCTGGGGCATCTTCTATTATAGGGGCTATTAATTTTATTTCCACTATTTTGAATATACGGGGGCATGGAAT
GACTATAGAAAAGGTTCCTTTATTTGTTTGATCTGTTTTAATTACGGCTGTGTTATTATTATTGTCTTTGCCAGTACTAG
CAGGGGCTATTACCATGCTTTTAACAGACCGAAATTTTAATACATCATTTTTTGATCCTTCAGGGGGGGGTGATCCAGTA
TTATTTCAACATTTGTTT
>FINOR319-12|Sarcoptiformes|COI-5P
AACTCTATACTTTATTTTTGGGATATGAGCCGGTATGGTAGGATCAGGCCTAAGAGCACTAATTCGGTTAGAGTTAGGTC
AACCGGGGTCTCTTTTAAACAACGACCAAATTTATAACACTATCGTCACCGCCCATGCTTTTGTAATAATCTTTTTTATA
GTGATACCTGTCATAATTGGAGGGTTTGGTAATTGGCTCATTCCAATAATAATTGGAGCCCAAGATATAGCTTTCCCTCG
CATAAATAATATAAGATTTTGGCTACTTCCACCTTCTTTAACACTCCTTACATCGTCTGCTTTTGCTGGCATAGGAGCAG
GGACCGGATGGACTGTATATCCGCCCCTAGCTGGAAACATGTTTCATTCTGGTATCTCAGTAGACTTAGCAATTTTTAGG
CTTCATTTAGCTGGTGCATCCTCTATCTTAGGGGCTATCAACTTTATCACTACTATCATAAATATACGGTCTTCCGCTAT
AAGAATAGATGCAATCCCCTTATTTGTGTGGTCCGTTTTAATCACAGCAGTTCTTCTACTGCTCTCTCTACCAGTATTGG
CAGGAGCTATTACTATACTACTAACAGACCGAAACTTTAACACCTCATTTTTTGACCCTACGGGTGGGGGAGATCCCATT
CTTTACCAACATCTATTT
>GBCH0862-06|Cicurinacaliga|COI-5P|AY633018
TTAAGTTTTTGGCTTTTACCTCCTTCTTTATTATTGTTGTTTATTTCTTCTATAGTGGAGATAGGGGTTGGGGCTGGATG
AACTATTTATCCGCCTTTGGCTTCTAGTATAGGACATGCTGGGAGTTCAGTAGATTTTGCTATTTTTTCTTTACATTTAG
CTGGGGCTTCTTCTATTATGGGGGCTATTAATTTCATTTCTACTATTATTAATATGCGAGCATACGGAATGTCTATAGAT
AAGGTTCCATTATTTGTTTGATCTGTTTTAGTTACGGCGGTATTATTATTGTTGTCTTTACCTGTTTTAGCGGGGGCTAT
TACTATATTGTTGACTGATCGAAATTTTAATACTTCTTTTTTTGACCCTGCTGGGGGAGGAGATCCTATTTTATTTCAAC
ATTTATTTTGATTTTTCGGTCATCCTGAGGTATATATTTTAATTTTACCTGGATTTGGTATTGTGTCTCATGTAATTTCT
TTTTCGGTGGGAAAGCGGGAACCTTTTGGTAGATTAGGAATAATTTATGCTATGGTTGGAATTGGTGGAATAGGATTTGT
TGTTTGAGCGCATCATATGTTTTCTGTAGGGATAGATGTAGATACTCGGG
>AUSPI130-11|Araneae|COI-5P
AACTTTGTATTTAATTTTTGGGGCTTGGTCTGCCATAGTAGGAACTGCTATAAGTGTATTAATTCGAATAGAATTAGGTC
AAACAGGTAATTTTTTGGGTAATGACCATATGTATAATGTTATTGTAACGGCCCATGCATTTGTTATAATTTTTTTTATA
GTTATGCCTATTATAATTGGTGGTTTTGGAAATTGATTAGTTCCTTTAATATTAGGGGCTCCGGATATGGCTTTCCCTCG
TATAAATAATTTGAGATTTTGATTGTTGCCTCCTTCTTTATTTTTATTATTTATTTCCTCTATAGCTGAGATAGGGGTTG
GGGCTGGTTGAACTGTTTATCCTCCATTAGCTTCTGTTGTAGGTCATGGGGGTAGATCTGTTGATTTTGCAATCTTTTCT
TTACATTTAGCTGGAGCTTCTTCTATTATAGGGGCTATTAATTTTATTTCTACTATTATTAATATACGTTTAATTAATAT
ATCAATGGATAAGGTACCATTATTTGTGTGATCTGTATTTATTACAGCAATTCTATTATTATTGTCTCTTCCAGTTTTAG
CTGGAGCTATTACTATATTATTAACTGATCGAAATTTTAATACTTCTTTTTTTGACCCAGCTGGGGGAGGGGATCCTATT
TTATTTCAACATTTATTT
>SSWLD8216-13|Mesostigmata|COI-5P
TTAATTTTTGCTGCTTGATCTGGCATAGTAGGAACAGCTTTAAGAATAATTATTCGAGCTGAATTAGGCCAACCAGGACC
TTTAATTGGGGACGATCAAATTTATAATGTAATTGTTACTGCTCATGCTTTTGTAATAATTTTTTTTATGGTAATACCTG
CTTTGATTGGGGGATTTGGAAATTGATTAACTCCTATTATAATCATATCTCCTGATATAGCATTTCCTCGGATAAATAAT
ATAAGATTTTGACTTTTACCTCCCTCATTAATATTTCTTTTAATATCTTCTATAGTAGAATCCGGGGTAGGTACGGGTTG
AACAGTATATCCTCCTTTAGCATCTAATATTTCTCATAGAGGTAGTGCAGTAGATTTAGCAATTTTTAGTTTACATTTAG
CCGGTATTTCTTCTATTTTAGGGTCAATTAATTTTATTACTACTATTATAAATATACGACCTAAAAATATAACAATAGAA
CAAGTGCCTTTATTCGTATTATCTGTTTTAATCACAACTATTTTACTTATATTATCTTTACCCGTATTAGCTGGAGCTAT
TACTATATTATTAACT
>CHACB1105-10|Cosmolaelaps|COI-5P|HM907202
TACTATCTACCTAATTTTCTCTTTTTGATCTGGTATTTTTGGTACTGCTCTAAGTATAATTATTCGTATTGAACTTGGCC
AACCTGGGTATTTAATTAACGATGATCAAATTTATAACTCAATTGTTACTTCGCACGCTTTTATTATAATTTTTTTTATA
GTAATACCTGCAATAATTGGAGGTTTTGGTAATTGACTTATTCCATTATTTTTAAGAATTCCTGATATAGCTTTTCCTCG
AATAAATAATTTAAGTTTTTGATTTTTACCCCCTTCAATCATTCTCTTAATCTTTTCATCTTTTATTGAAAGAGGTGTAG
GAACTGGATGAACTGTTTACCCCCCATTAGCTAGAAATGTGTCTCATAGAGGAAGTGCCGTTGATATTGCTATCTTTAGA
TTACATTTAGCAGGTATTTCTTCTATTCTAGGGTCTATTAATTTTATCTCTACAATCTTAAATATACGACCAAAATCTAT
GTCTATAGAAATACTCCCTTTATTTATTTGATCTGTTTTTATTACAACTATCCTCCTCCTTTTATCTCTTCCCGTCCTTG
CAGGCGCAATTACTATACTCTTAACAGATCGTAATTTTAATACCTCTTTTTTTGATCCTAGAGGAGGAGGAGATCCTATT
CTATATCAACATTTATTT
>TURAR1711-11|Araneae|COI-5P
AACTATATATTTTGTTTTTGGGGCTTGAGCTGCTATAGTAGGGACTGCAATGAGAGTTTTAATTCGAATTGAACTTGGGC
AAACTGGATCAATGTTAGGGGATGACCAGTTATATAATGTTATTGTTACGGCTCATGCTTTTGTTATAATTTTTTTTATA
GTTATACCTATTTTAATTGGTGGGTTTGGGAATTGGTTGGTTCCTCTAATATTAGGAGCTCCTGATATAGCTTTTCCTCG
AATAAATAATTTAAGATTTTGACTTCTACCTCCATCTCTTTTACTATTATTTATTTCTAGAATAGTAGAGATGGGAGTTG
GGTCTGGTTGAACTGTGTATCCTCCTTTAGCTTCTTTAGAAGGGCATACTGGTAGTTCTGTGGATTTTGCTATCTTTTCT
CTTCATCTGGCCGGGGCTTCTTCTATTATAGGAGCTATCAATTTTATTTCTACAATTATTAATATACGTGGGTATGGAGT
TTCTATAGAGAAAGTCCCTTTATTTGTGTGGTCGGTTTTAATTACGGCAGTTCTTTTATTACTTTCTCTTCCAGTATTAG
CAGGGGCTATTACTATGTTATTGACTGATCGTAATTTTAATACTTCTTTTTTTGACCCTGCCGGGGGAGGGGATCCTGTT
TTGTTTCAGCACCTTTTT
>SSBAC3332-12|Trombidiformes|COI-5P
AACTCTTTATTTTTGCTTAGGTCTTTGATCTGGAATAATAGGAACTAGTCTTAGAATAATTATTCGAACAGAATTGGCAC
AACCATCTACCTTGATTGGAAACGATCAAATTTATAACGCAATCGTAACAGCTCATGCATTTATCATAATTTTCTTCATA
GTCATACCTACTATAGTAGGAGGATTTGGAAACTGAATTGTTCCCATGTTAATTAGTGCCCCTGATATAGCTTTCCCTCG
GCTTAATAATATAAGATTCTGATTACTAATTCCTTCTCTTTCTTTATTATCTTTATCTTTATTTTCATCTACTGGAGCTG
GAACAGGATGGACTGTTTATCCTCCTCTTTCAAGAAATATAGCACATGCTGGCGGAGCTGTTGATTTAACAATTTTTTCC
CTTCATTTAGCAGGGATTTCTTCTATCTTGGGAGCAATTAATTTTATAGCTACTATTATTAATATAACGCCTAATTCTAT
AACATGAGAGAGAGTTCCCCTCTTTGTATGATCAATTTTTATTACAGCTGTTCTTCTTCTCCTATCACTCCCCGTTTTAG
CTGGAGCCATTACTATACTTCTTACAGATCGAAACTTAAATACTTCCTTTTTTGACCCCAGTGGGGGAGGAG
>BBUSA076-10|Araneae|COI-5P|HQ930679
GACTTTATATTTAATATTTGGTGTTTGATCGGCAATAATAGGAACTGCAATGAGAGCATTGATTCGGATAGAATTAGGAA
ATCCTGGAAGTTTATTAGGTGATGATCATCTTTATAATGTCGTTGTTACTGCTCATGCTTTTGTAATGATTTTTTTTATA
GTTATACCAATTTTAATTGGAGGGTTTGGAAATTGATTGGTTCCATTAATATTGGGGGCTCCTGATATGTCTTTTCCTCG
AATAAATAATCTTTCTTTTTGATTATTACCTCCTTCTTTATTTTTGTTATTTATATCTTCTATAGTTGAAATAGGTGTAG
GAGCTGGTTGAACTATTTATCCTCCTTTAGCATCTACGATAGGTCATACAGGAGTTTCAATAGACTTAACTATTTTTTCT
CTTCACTTAGCTGGGGCTTCTTCTATTATAGGAGCAGTAAATTTTATTTCTACTATTATTAATATACGAATGTTAGGAAT
ATCTATAGAGAAAGTACCTTTATTTGTTTGATCTGTATTAATTACCGCTGTTTTATTATTACTTTCTTTACCTGTATTAG
CAGGTGCTATTACTATATTATTAACAGATCGGAATTTTAATACTTCTTTCTTTGATCCTGCAGGAGGTGGTGATCCAATT
CTATTCCAACATTTATTT
>BBUSE1334-12|Araneae|COI-5P
TACGTTATATTTAATTTTTGGTGCATGGGCTGCAATAGTTGGAACTGCAATGAGTGTATTAATTCGGATAGAATTGGGTC
AAGTAGGAAAGTTTTTAGGTGATGATCATTTATATAATGTTATTGTTACTGCACATGCGTTTGTTATAATTTTTTTTATA
GTAATACCTGTATTGATTGGAGGTTTTGGTAATTGATTGGTTCCTTTAATGTTGGGTGCTCCTGATATAGCTTTTCCTCG
TATGAATAATTTAAGTTTTTGATTATTACCACCATCATTATTATTATTATTTATTTCATCTATAGTAGAAATAGGAGTAG
GAGCAGGGTGAACTGTTTATCCTCCTTTGGCTTCATTAATAGGTCATGCTGGTAGTGCGGTTGATTTTGCTATTTTTTCG
TTACATTTAGCTGGTGCTTCATCTATTATAGGAGCTATTAATTTTATTTCTACTGTTATTAATATACGATCATTAGGTAT
GAGAATGGAAAAGGTACCTTTATTTGTATGGTCAGTTGTTATTACTGCTGTTTTGTTATTATTATCACTTCCTGTACTAG
CAGGAGCTATTACTATATTGCTTACAGATCGAAATTTTAATACTTCATTTTTTGATCCGGCTGGAGGAGGGGATCCTATT
TTATTTCAGCATTTATTT
>SSWLD8315-13|Sarcoptiformes|COI-5P
AACTTTATATTTTGTCTTTGGGGCTTGGGCTGGTCTCTTGGGATCGGCGCTAAGAGGTTTAATCCGATTGGAATTAGGGC
AACCAGGATCCTTAATAGAAAATGACCAAATTTATAACACCATCGTCACAGCTCACGCTTTCGTTATAATTTTTTTCATG
GTCATGCCCGTAATAATCGGGGGATTTGGAAATTGGATTGTTCCTATGATAATTGGAGCTCAGGATATGGCGTTCCCACG
TATAAACAATATGAGATTTTGACTTCTTCCCCCTTCTCTAACATTACTATCGGCATCAGCTTTCGCCGGTGTAGGGGCAG
GAACGGGATGGACTGTATACCCTCCCCTAGCAGGGAATCTGTTTCACTCTGGGATTTCAGTAGATTTAGCCATTTTTAGA
CTTCATCTCGCAGGAGCCTCTTCCATTTTAGGAGCCATTAATTTCATCACCACTATTTTAAATATGCGTTCTTCTTCTTT
AACTCTAGATACCATTCCTTTGTTTGTTTGATCTGTTTTAATCACAGCTGTACTTCTATTACTTTCACTACCAGTGCTGG
CTGGGGCTATCACTATGCTACTCACGGATCGAAATTTTAACACTTCTTTTTTTGATCC
>NOARA207-11|Araneae|COI-5P
AACTTTATATTTATTATTTGGATGTTGGTCTGCTATAGTTGGTACAGCTATAAGAGTATTAATTCGAATGGAATTAGGTC
AGGTAGGTAGATTGTTGGGTGATGATCATTTATATAATGTTATTGTAACTGCTCATGCTTTTATTATAATTTTTTTTATA
GTAATACCTATTTTGATTGGAGGTTTTGGTAATTGATTGGTACCTTTAATGTTAGGTGCACCTGATATGGCATTTCCTCG
AATGAATAATTTAAGTTTTTGATTATTACCACCTTCATTAATTATATTATTTGTTTCGTCAATAGTGGAGATAGGAGTAG
GGGCTGGTTGAACAGTATATCCTCCATTGGCTTCTGTTGTTGGGCATCCTGGGAGAGCGATAGATTTTGCTATTTTTTCT
TTACATTTAGCTGGAGCTTCTTCTATTATAGGTGCTATTAATTTTATTTCTACTGTAATTAATATACGATCTTTATCTAT
AACAATAGAAAAGGTTCCTTTATTTGTTTGGTCTGTACTGATTACGGCAGTATTATTATTATTATCATTGCCGGTGTTAG
CTGGGGCTATTACTATATTATTAACAGATCGAAATTTTAATACTTCATTTTTTGATCCTGCTGGAGGGGGTGATCCTGTT
TTATTTCAACATTTATTT
>ARMXB140-10|Araneae|COI-5P
TACTTTATATTTTTTGTTTGGTGGGTGGTCTGCTATAGTAGGAACGGCTTTGAGAATATTGATTCGTGTAGAGTTAGGTC
AAGTGGGAAGATTATTTGATGATGATCATCTTTATAATGTGATTGTTACTGCTCATGCGTTAGTTATAATTTTTTTTATA
GTTATACCGGTTCTTATTGGTGGATTTGGTAACTGGTTGGTGCCTTTAATGTTGGGTGCTCCTGATATGGCCTTTCCTCG
TATAAATAATTTGAGATTTTGGTTGTTGCCTCCTTCTATTATTTTATTGGTATTGTCTTCTATAGTAGAAATAGGGGTGG
GGGCTGGGTGAACTATTTATCCACCTCTTTCTTCGTCTATTGGTCATTCTGGGGTTTCTATAGATATAGCTATTTTTTCT
TTACATTTAGCTGGGGCTTCTTCCATTATGGGTGCTATTAATTTTATTTCTACAATTATTAATATACGAATGGTGGGTTT
AGGGATAGATAGGATTTCTTTGTTTGTGTGATCTGTATTAATTACGGCTGTTTTGTTGCTGTTATCGTTGCCTGTTTTGG
CTGGAGCTATTACGATATTGCTTACTGATCGAAATTTTAATACAGCGTTTTTTGATCCGGCTGGGGGAGGGGATCCAATT
TTATTTCAGCATTTATTT
>CNJAD2341-12|Mesostigmata|COI-5P
AACATTATATTTAATTTTTGCTGCTTGATCCGCTATAGTAGGAACTTCTCTCAGAATAATTATTCGATTAGAATTAAGAC
AACCTGGTTCTTTAATTGGAGATGACCAAATTTATAATACTATTGTTACTGCTCATGCTTTTATTATAATTTTTTTTATA
GTTATGCCTGCTATAGTAGGAGGTTTTGGAAATTGAATAACTCCTTTAATAATTTCCGCCCCTGATATAGCTTTTCCTCG
TTTAAATAATATAAGTTTTTGACTTCTACCCCCAAGTTTATTCCTATTATTAAGTAGTTCTTTAGTTGAAATAGGTGCTG
GTACAGGATGAACAGTGTATCCCCCTTTAGCAGGTAATATTAGTCATAGAGGGGGTGCTGTTGACTTGGCTATTTTTAGT
CTCCACTTAGCAGGAGCCTCCAGAATTTTAGGGTCTATTAATTTTTTAACAACAATTTTAAATATACGACCAAAAGATAT
AAAAGCAGAAAAAACTTCCTTATTTATTTGATCTATTTTTTTAACAACAGTATTATTACTATTAAGTTTACCTGTTTTAG
CAGGAGCTATCACAATACTACTTACTGATCGAAATTTTAATACATCTTTTTTTG
>SSBAB1194-12|Trombidiformes|COI-5P
AACATTATACTTTGCTTTCGGGCTATGATCTGCCTTATTAGGGGCGTCTATAAGAATTTTAATTCGAATAGAATTAGGCC
AACCAGGATCAATAATACAAAATGATCAAATTTACAATACTATTGTAACAGCACACGCCTTCGTAATAATTTTCTTTATA
GTCATACCGATTATAATTGGGGGATTTGGAAATTGATTAGTACCAATAATAATTGGAGCACCTGATATAGCATTCCCACG
AATAAATAATATAAGCTTCTGACTTCTTCCACCATCTTTATCCTTACTATTAATATCAGCTTTTACTAGAGCAGGTGTTG
GAACTGGATGAACAGTTTATCCTCCCCTTTCTAGAAATATCGCTCATCCAGGAGGAGCAGTAGATTTAGGAATTTTCTCT
CTTCACCTTGCAGGAATTTCATCAATTCTAGGAGCTATTAATTTTATAACAACAATTATTAATATACGATCCCCCGCTAT
AACATTTGAACGAATCCCTTTATTTGTTTGATCAGTTTTTATTACAGCTCTCCTTCTTTTACTATCCCTACCGGTACTAG
CTGGAGCTATTACTATACTCCTAACAGATCGAAACTTTAATACATCATTCTTTGACCCAGCAGGAGGGGGGGACCCA
>TURAR612-10|Araneae|COI-5P|HQ582340
AACATTATATTTAATTTTTGGTGCTTGGTCAGCTATATTAGGGACTGCAATAAGAGTATTAATTCGTGTAGAATTAGGTC
AACCTGGAAGATTATTAGGTGATGATCAGCTTTATAATGTAATTGTTACTGGTCATGCTTTTATTATAATTTTTTTTATA
GTGATACCAATTTTAATTGGAGGTTTTGGTAATTGGTTAATTCCTTTAATGTTAGGATCTCCTGATATAGCATTTCCTCG
GATAAATAATTTAAGATTTTGATTATTACCTCCTTCGTTATTGCTATTATTAATTTCTTCTATGGAAGAAATAGGAGTAG
GGGCAGGGTGAACAATTTATCCTCCTTTATCATCTTTAGAGGGGCATAGAGGGAGATCAGTAGATTTTGCTATTTTTTCT
TTACATTTAGCCGGTGCTTCTTCTATTATAGGGGCTATCAATTTTATTTCTACTATTTTGAATATGCGAATAATAGGGAT
AAGAATAGAAAAAGTTAGATTATTTATTTGGTCAGTTTTAATTACAGCTGTATTATTATTATTATCCTTGCCTGTTTTAG
CAGGAGCCATCACTATATTATTAACAGATCGAAATTTTAATACTTCATTTTTTGATCCTGCTGGAGGAGGGGATCCTATT
TTATTTCAACATTTGTTT
>SSWLC1163-13|Sarcoptiformes|COI-5P
AACTTTATATTTTGTTTTTGGAGCTTGAGCTGGTTTGCTAGGATCAGCTCTTAGCGGTTTAATTCGACTAGAGCTAGGAC
AGCCAGGATCTTTATTAGAAAATGACCAGATTTACAACACAATTGTAACAGCTCATGCTTTCGTGATAATTTTTTTTATG
GTTATGCCAGTAATAATTGGAGGGTTTGGCAATTGGTTAGTTCCAATGATAATTGGGGCACAAGACATAGCTTTCCCACG
TATAAATAACATAAGATTCTGACTTTTACCTCCTTCGCTAGCCTTGCTATCTTCATCAGCTTTTGCAGGGATAGGGGCAG
GAACAGGTTGAACAGTGTACCCACCTTTAGCAGGAAATCTTTTTCACTCAGGATTTTCTGTAGATTTAGCCATTTTTAGC
CTTCATTTAGCAGGGGCATCTTCTATTTTAGGAGCTATCAATTTCATCACTACCATTTTAAATATGCGATCTTCTTCCAT
AACATTAGACTCTATCCCCCTATTCGTTTGATCTGTACTAATTACTGCTGTTTTGTTATTACTATCTCTCCCAGTTTTGG
CAGGAGCTATCACTATGCTTTTAACAGACCGAAACTTTAACACCACCTTCTTT
>SSWLD8341-13|Sarcoptiformes|COI-5P
AACTTTATACTTTATTTTCGGGGCGTGAGCTGGCCTCCTGGGGTCCGCACTAAGAAGGCTGATTCGTCTAGAGCTGGGGC
AACCAGGATCTTTGCTAGAAAATGATCAAATTTACAATACCATTGTGACAGCCCACGCTTTTGTCATAATTTTTTTTATA
GTGATGCCCATCATAATCGGAGGGTTCGGCAATTGACTGGTCCCAATAATAATCGGAGCTCAAGACATGGCCTTCCCTCG
AATAAATAATATAAGGTTTTGACTGCTCCCTCCGTCTCTAACCCTGCTTTCCCTTTCAGCCTTCGCTGGGATAGGGGCAG
GCACCGGTTGGACCGTATACCCCCCCTTAGCTAGAAGTATATTTCACTCAGGGATTTCAGTAGATCTTGCCATTTTTAGA
CTTCACTTAGCAGGGGCCTCTTCTATTTTAGGGGCTATTAACTTTATCACTACTATTCTAAATATACGATCTTCTTCTCT
AACCCTGGACTCAATCCCTTTATTTGTGTGATCCGTACTAATTACCGCAATCCTTCTTTTACTATCATTACCCGTACTAG
CAGGAGCAATTACAATACTGCTGACAGACCGAAATTTCAACACCTCTTTTTTCGACCCTTCGGGAGGGGGGGACCCC
>SSWLA037-13|Sarcoptiformes|COI-5P
AACTTTGTATTTCATTTTCGGGGCATGAGCAGGTTTGTTAGGGTCTGCTTTAAGAGGTCTTATCCGGTTAGAGTTGGGCC
AACCCGGATCTCTTATAGAAAACGATCAAATTTACAACACTATTGTGACAGCTCATGCTTTTGTAATAATTTTTTTTATA
GTAATACCAGTAATAATCGGGGGTTTCGGAAACTGACTAGTACCCATAATAATTGGAGCCCAAGATATGGCGTTTCCACG
AATAAATAACATAAGATTTTGGCTATTGCCCCCTTCCTTAGCTCTTCTTTCTTCTTCAGCATTCGCAGGAATAGGGGCTG
GCACTGGATGAACGGTATACCCTCCTTTATCAGGAAATTTATTTCACTCTGGCATTTCAGTAGACCTGGCTATTTTCAGA
CTTCATCTAGCAGGGGCTTCTTCCATTTTAGGAGCAATTAATTTTATTACGACAATTATAAATATACGCTCGTCTTCTAT
AACCTTAGACACTATTCCTTTATTTGTGTGATCAGTGCTAATCACTGCGGTACTGTTGTTGCTTTCCTTACCTGTGTTAG
CAGGGGCTATCACCATGCTCTTAACAGACCGTAATTTTAATACCACTTTTTTCGACCCAGCTGGTGGGGG
>SPIEU644-10|Araneae|COI-5P|HQ975257
TACTTTATATTTAATATTTGGAGTTTGATCTGCTATAGCAGGAACAGCTATAAGAGTATTAATTCGAATAGAGTTAGGAA
ATCCTGGAAGATTATTAGGAGATGATCATTTATATAATGTAGTGGTTACTGCTCATGCTTTTGTTATAATTTTTTTTATA
GTTATACCTATTATAATTGGAGGTTTTGGTAATTGATTAGTTCCTTTAATATTAGGAGCTCCTGATATATCATTTCCCCG
AATAAATAATTTGTCTTTTTGACTTTTACCCCCTTCTCTATTTTTATTATTTATATCTTCTATAGTAGAAATAGGAGTTG
GTGCTGGTTGAACAGTTTATCCTCCTTTAGCATCTACAGTTGGTCATATAGGAAGATCTATAGATTTTGCTATTTTTTCT
TTACATTTAGCTGGGGCTTCTTCTATTATAGGAGCCGTTAATTTTATTTCTACTATTATAAATATACGATTAAATGGAAT
ATCAATAGAAAAAATCCCTTTATTTGTATGGTCTGTTTTAATTACTGCTATTTTACTTTTATTGTCTTTACCAGTTTTAG
CTGGTGCTATCACTATATTATTAACTGATCGAAATTTTAATACTTCTTTTTTTGATCCAGCTGGTGGAGGTGATCCTATT
TTATTTCAACATTTATTT
>CFWIE320-10|Trombidiformes|COI-5P
AACTCTTTACTTCGCTTTCGGAGCATGATCAGGTATAGTAGGAGCTAGCTTAAGAACTTTAATTCGTCTAGAACTGGGAC
AACCAGGCTCTCTAGTAGGAAGAGATCAAATCTATAATACTATTGTAACAGCTCACGCCTTTGTTATAATCTTCTTTATA
GTTATACCTATAATAATTGGAGGTTTCGGAAATTGATTAGTCCCATTAATGCTATCAGCCCCTGATATAGCATTTCCCCG
AATAAATAATATAAGATTCTGACTTTTACCTCCGGCACTAATTCTTCTATTATCAAGATCATTTGCTTCAATAGGAGCTG
GAACAGGTTGAACAGTTTATCCTCCTCTCTCTAGAAATCTAGCTCATGCAGGACCATCGGTGGACTTAACAATTTTTTCA
TTACACTTAGCAGGAATTTCTTCCATTTTAGGAGCTATCAATTTTATGGCAACTATTATTAATATAAAACCAAAAACTAT
AAAAATAGAACAAATACCATTATTTGTTTGATCAATTTTTATTACTACAATTTTACTTCTTCTATCTTTACCAGTCTTAG
CAGGAGCTATTACCATACTTCTGACAGATCGGAATTTTAATACATCATTTTTTGACCCTGCTGGAGGAGGAGACCCTATT
TTATACCAACACTTATTT
>SPIPO637-10|Araneae|COI-5P|HQ976768
AACATTGTATTTAATTTTTGGAGCTTGATCTGCTATAGTGGGTACAGCAATAAGAGTTTTAATTCGAATAGAATTAGGTC
AAACTGGTAATTTTTTGGGTGATGATCATTTATATAACGTGATCGTAACTGCTCATGCTTTTGTAATGATTTTTTTTATA
GTTATGCCAATTATAATTGGGGGGTTTGGAAATTGATTAGTTCCTTTGATGCTAGGTGCACCAGATATGGCTTTTCCTCG
AATAAATAATCTTAGATTTTGATTGTTGCCGCCTTCTTTAATGTTGCTTTTTATTTCATCTTTAGCTGAGATAGGAGTTG
GAGCAGGTTGAACTATATATCCTCCCTTAGCATCCATTATTGGACATAATGGTAGATCTGTAGATTTTGCTATTTTTTCG
TTACATTTGGCTGGAGCTTCTTCTATTATGGGAGCTATTAATTTTATTACTACGGTTATTAATATACGTTTAGTGGGTTT
ATCTATGGATAAATTGTCTTTATTTGTATGATCTGTAATTATTACTGCTGTTTTATTATTACTCTCATTACCGGTTTTGG
CCGGTGCTATTACAATATTACTAACTGATCGTAATTTTAATACTTCTTTTTTTGATCCTGCTGGTGGTGGGGATCCAATT
TTGTTTCAACATCTTTTT
>GBCH6360-13|Steganacarusmagnus|COI-5P|JF264148
TATCCGTTTTGAGCTAGGAGAAATAGGTTCAATAATAGGAAGAGATCAAGTTTACAATGTCTCTGTTACTTCACACGCTT
TAATTATGATTTTTTTTATAGTGATACCAATTATAATTGGAGGTTTTGGTAATTGGTTGATCCCTTTAATAATTGGTTCT
CAAGATATAGCTTTTCCACGAATAAATAATATAAGATTTTGATTACTTCCGCCATCTTTATTACTATTAATTATTTCTTC
CTTTAGAGGAAGAGGAGTGGGTACGGGGTGAACTATCTACCCACCCCTTTCCGGGATACTTTTTCACTCTGGGTATAATG
TAGATTTGGCTATCTTTAGTCTACATTTAGCAGGTGTTTCATCTATCCTAGGTTCAATTAATTTCATCTCTACAGTATTA
AACATAAAATCAAATTACCTAAGATTTGAATGCATACCGTTATTTATTTGATCTGTATTTGTTACTACTATCCTTCTTCT
TCTTTCCCTACCAGTTTTAGCAGGAGCTATCACTATGCTTCTAATAGACCGTAATTTTAATACAACTTTCTTTGATCCAT
CAGGTGGGGGAGACCCAATTCTATTCCAACACCTATTC
>GBCH1435-06|Saltoniaincerta|COI-5P|DQ411389
GGATGAACGGTTTATCCTCCTTTGGCTTCTTTGATAGGGCATGCTGGTAGATCGATGGATTTTGCTATTTTTTCTCTTCA
TTTGGCAGGGGCTTCTTCTATTATAGGGGCTATCAATTTTATTTCTACTATTTTGAATATGCGTGTGGAAGGGATGAGAA
TGGATAGGGTTCCGTTGTTTGTGTGGTCAGTTTTAGTGACTGCGGTGTTATTGTTGTTATCATTGCCTGTTTTAGCAGGG
GCTATTACTATGTTGTTAACGGACCGAAATTTTAATACGTCTTTTTTTGATCCTGCTGGGGGTGGGGATCCTATTTTATT
TCAGCATTTATTTTGGTTTTTTGGGCATCCCGAGGTGTATATTTTAATTTTACCTGGGTTCGGGATTATTTCTCATGTGA
TTAGATATTCTGTTGGTAAACGTGAGCCGTTTGGGAGATTAGGGATAATTTATGCTATGGTAGGAATTGGGGGGATAGGA
TTTGTAGTGTGAGCTCATCACATATTTTCTGTGGGGATAGATGTGGATACTCGGG
>SMTPB15674-13|Scotinellamadisonia|COI-5P
ACATTATATTTATTATTTGGGTCATGATCAGCTATAGTAGGAACTGCTATAAGAGTTATTATTCGTATAGAATTGGGTCA
GATTGGTAGTTTATTAGGGGATGATCATTTATATAATGTAATTGTAACTGCACATGCATTTGTTATAATTTTTTTTATAG
TTATGCCAATTTTAATTGGAGGTTTTGGAAATTGATTAATTCCTTTAATGTTAGGGGCTCCAGATATAGCTTTTCCTCGA
ATAAATAATTTGAGATTTTGATTATTACCACCTTCATTAGTTTTATTATTTGTATCATCTATAGCTGAAATAGGAGTAGG
AGCTGGATGGACTATTTATCCTCCTTTAGCTTCTAGAGTAGGACATTTTGGAAGAGCTATAGATTTTGCTATTTTTTCTC
TTCATTTAGCTGGGGCTTCTTCTATTATAGGATCTATTAATTTTATTTCAACTATTATTAATATGCGTTCTTATGGAATA
ATAATAGAGAGGATTTCTTTGTTTGTGTGATCTGTATTTATTACTACTATTTTATTATTATTATCTTTACCAGTTTTAGC
TGGAGCTATTACTATATTATTAACTGATCGTAATTTTAAT
>MASPD092-10|Araneae|COI-5P|HQ991615
AACTTTGTATTTTATTTTTGGAGCTTGATCTTCTATAGTTGGAACGGCTATGAGAGTTTTAATTCGAATTGAGTTAGGTC
AACCTGGGAGTTTTTTAGGTAATGATCATTTATATAATGTAATTGTAACTGCTCATGCTTTTGTAATAATTTTTTTTATA
GTGATGCCTATTTTGATTGGAGGGTTTGGAAATTGGTTGGTTCCTTTAATGTTAGGAGCTCCTGATATAGCTTTTCCTCG
AATAAATAATTTGAGATTTTGATTACTACCTCCTTCACTTTTTTTATTATTTATTTCATCTATAGTAGATATAGGAGTGG
GAGCAGGATGAACTGTTTATCCTCCTTTGGCGTCCTTGGAAGGACATTCTGGGAGATCTATAGATTTTGCTATTTTTTCT
TTACATTTAGCTGGAGCTTCCTCAATTATAGGGGCTATTAATTTTATTTCTACTGTTTTTAATATACGGGTATTAGGAAT
GAGAATAGAAAAAGTACCTTTATTTGTGTGATCGGTATTAATTACTGCTGTTCTTTTATTATTATCTTTACCTGTATTAG
CAGGAGCTATTACTATATTGTTAACTGATCGAAATTTTAATACTTCTTTTTTTGACCCTTCGGGGGGAGGAGATCCTGTT
TTATTTCAACATTTATTT
>CNPAK313-13|Arachnida|COI-5P
ATGGTCTGGGATTTTGGGAAGCTCTTTAAGATTTTTAATTCGGTTGGAGTTAGGTCAAGCAGGAATTTTACTTGGAGATG
AGCATGTGTATAATAGGATTGTTACAGCCCATGCTTTTGTTATAATTTTTTTTATGGTGATGCCTGCTATAATTGGAGGA
TTTGGGAATTGGTTAGTTCCTTTAATGATTTCAGCGCCTGATATAGCTTTTCCTCGTATAAATAATATGAGATTTTGATT
GCTTCCTCCTTCTTTAACAATATTATTGATATCGTCTATTTTGGATGAAGGAATAGGGACTGGTTGGACTGTGTATCCTC
CTTTATCTTTAGTGTCTTTTCATAGAGGAGTTTCTGTAGATTTGGGAATTTTTTCTTTACATCTAGCTGGTATTTCATCT
ATTTTAGGAGCTGTTAATTTTATTTGTACTATTATAAATATACGAAGTGAGCTTTTAGTTTTAGAACGGATTCCTTTATT
TGTTTGATCAGTATTAATTACGGTAATTCTTTTATTATTAAGGTTGCCTGTATTAGCAGGAGCAATTACAATA
>ARONT267-09|Wulfilasaltabundus|COI-5P|GU682660
AACTTTATATTTAATTTTTGGAGCTTGATCTGCTATAGTAGGAACTGCAATAAGAGTATTAATTCGAATAGAATTAGGTC
AATCGGGTAGATTTTTTGGTGATGATCAATTATATAATGTTATTGTTACTGCTCATGCTTTTGTTATAATTTTTTTTATG
GTTATACCAATTTTAATTGGAGGTTTTGGCAATTGATTGGTGCCTTTAATATTAGGAGCTCCTGATATAGCTTTTCCTCG
AATAAATAATTTAAGTTTTTGATTGTTACCTTCTTCTTTAATATTATTATTTATTTCTTCTATAGTTGAAATAGGTGTTG
GTGCTGGTTGAACAGTATATCCACCATTATCTTCTAGCGTTGGACATATAGGAAGAGCTGTAGATTTTGCTATTTTTTCG
TTACATTTGGCTGGTGCTTCATCTATTATGGGAGCTGTGAATTTTATTTCTACTATTATAAATATACGTTCTTTTGGTAT
AACTTTCGAGAAAGTTCCTTTATTTGTATGATCTGTATTAATTACTGCAATTTTACTTTTATTATCTCTTCCTGTTTTAG
CAGGAGCTATTACTATATTATTGACTGATCGTAATTTTAATACTTCATTCTTTGATCCTGCAGGAGGAGGAGATCCTATT
TTATTTCAACATTTATTT
>CNPCF135-13|Sarcoptiformes|COI-5P
CACACTTTACTTTATTTTTGGAGCTTGATCAGGATTGTTAGGTTCCGCCCTTAGAGGACTAATTCGTCTTGAGCTAGGGC
AACCCGGCTCTTTAATAGAAAATGACCAAATTTATAACACTATCGTTACGGCTCATGCCTTCGTAATAATCTTTTTCATG
GTTATACCTGTAATAATCGGAGGATTTGGGAATTGGCTGATCCCTATGATGATTGGAGCTCAAGACATGGCTTTCCCTCG
AATAAACAATATAAGATTTTGGCTGTTGCCACCTTCGCTAGCATTACTTTCCTCTTCCGCTTTTGCCGGTATAGGAGCTG
GCACCGGTTGAACTGTGTATCCACCTTTAGCTGGAAATTTGTTCCATTCCGGTATTTCTGTGGATTTGGCCATTTTTAGA
CTTCATTTAGCGGGGGTCTCTTCTATTCTGGGAGCAATTAATTTTATTACCACTATCTTAAATATGCGATCTTCTTCTAT
AACTTTAGATTCTATTCCTTTATTCGTTTGATCTGTTTTAATCACAGCCGTGCTGTTATTACTATCTTTACCTGTATTAG
CGGGGGCGGTCACTATACTTTTAACAGACCGTAACTTCAATACATCCTTTTTTGACCCTTCTGGGGGAGG
>SPICH402-09|Pocadicnemisamericana|COI-5P|GU684203
AAGTTTATATTTTGTTTTTGGGGCTTGGGCTGCTATAGTGGGTACAGCAATAAGAGTGTTGATTCGAATTGAATTAGGTC
AGACTGGTAGATTATTAGGAGATGACCAGTTATATAATGTTATTGTTACTGCTCATGCTTTTGTTATAATTTTTTTTATA
GTTATACCTATTTTAATTGGGGGGTTTGGAAATTGGTTAGTACCATTAATGTTGGGGGCTCCAGATATAGCTTTTCCTCG
TATAAATAATTTAAGATTTTGATTGTTACCTCCCTCTTTATTATTATTATTTATTTCTAGAATGGATGAAATAGGGGTAG
GAGCGGGGTGAACTGTTTATCCACCCCTTGCTTCTTTAGAAGGACATTCTGGGAGTTCAGTAGATTTTGCTATTTTTTCT
TTACATTTAGCTGGAGCGTCATCTATTATAGGGGCTATTAATTTTATTTCTACTATTTTAAATATACGAGGGTACGGGAT
AACTATAGAAAAGGTTCCTTTGTTTGTTTGATCTGTATTAATTACAGCTGTATTATTGTTGTTGTCTTTACCTGTATTGG
CAGGAGCTATTACTATACTTTTAACAGATCGAAATTTTAATACTTCTTTTTTTGACCCCTCTGGGGGGGGAGACCCGGTT
TTGTTTCAGCACTTATTT
>MYMCG152-12|Eupodidae|COI-5P|JX838375
AACATTATATTTTGTTTTTGGTTTATGGGCTGCCTTATTAGGAGCCTCCATAAGTATATTTATTCGAATAAAATTAGGAA
GCCCTAATTTAATAGGACAAAATGATCAATTTTATAATGTTATAGTTACAGCTCATGCTTTTGTGATAATTTTCTTTATA
GTAATACCCATTATAATTGGAGGATTTGGTAATTGACTTGTACCAATCATAATTAATGCTCCAGACATAGCCTTTCCTCG
TATAAATAACATAAGATTCTGACTATTACCTCCTTCCCTTATACTTTTAATTATATCTTCATTATCAAATTCTGGAGCAG
GAACAGGATGAACAGTTTACCCACCTTTATCAAATCAAATATTTCACAGAGGTTCTTCTGTTGATCTAACAATTTTTTCT
CTCCACATAGCAGGAATCTCTTCAATTTTAGGAGCAATTAACTTCATTACAACAATTATAAATATACGATCCAAAATAAT
AAATTTTGAACGAATACCTTTATTCGTATGATCAGTATTTATTACTGCAATTCTTCTCCTTTTATCTTTACCAGTATTAG
CCGGTGCTATTACAATACTTTTAACAGATCGAAACTTTAATACATCATTCTTTGATCCAGCCGGAGGAGGAGACCCTATT
TTATATCAACATCTATTT
>RBINA3531-13|Tetragnathastraminea|COI-5P
AGTTTATATTTTTTATTTGGTGTTTGATCTGCTATAGTAGGAACAGCGATGAGAGTTTTAATTCGGATTGAGTTAGGACA
ATCTGGATCATTTTTGGGAGATGATCAATTGTATAATGTTATTGTGACGGCTCATGCTTTTGTTATAATTTTTTTTATGG
TTATACCTATTTTAATTGGGGGTTTTGGAAATTGGCTGGTTCCTTTAATGTTAGGGGCCCCCGATATAGCTTTTCCTCGG
ATAAATAATCTTAGTTTTTGGCTTTTACCCCCTTCCCTTTTTATATTATTTATTTCATCAATGGTAGATGTTGGGGTGGG
GGCAGGCTGGACTGTTTATCCCCCTTTAGCCTCTTTAGAAGGGCACCCCGGGAGTTCTGTGGATTTTGCTATCTTTTCTC
TTCATTTGGCGGGGGCTTCTTCTATTATAGGGGCTATTAATTTTATTTCCACCATTATCAATATACGGATGAGAGGAGTT
TCTATAGAAAAGGTCCCCCTTTTTGTGTGGTCGGTGTTGATTACTGCAGTTTTGCTGTTATTGTCTCTTCCTGTTTTAGC
GGGGGCTATTACTATATTGTTGACAGATCGTAATTTT
>CHEFI598-12|Araneae|COI-5P
TACTTTATATTTATTATTTGGAGCTTGATCTGCTATAGTAGGAACAGCTATAAGTGTAATAATTCGAATTGAATTAGGTC
AATCTGGAAGATTTTTGGGAGATGATCAGTTATATAATGTAGTAGTTACAGCACATGCTTTTATTATAATTTTTTTTATA
GTTATGCCTATTTTAATTGGAGGGTTTGGAAATTGATTAATCCCTTTAATATTAGGAGCTCCAGATATAGCTTTTCCTCG
AATAAATAATTTAAGATTTTGGTTACTTCCTCCTTCATTAATATTATTATTTATTTCTTCAATAGTTGAGATAGGGGTAG
GAGCAGGATGAACTGTTTATCCTCCTTTATCTTCTTTAGAAGGGCATGCGGGTAGTTCTGTAGATTTTGCTATTTTTTCT
TTACATTTAGCTGGTGCTTCTTCAATTATAGGAGCTATTAATTTTATCTCTACAGTAATAAATATACGTTTATTAGGTAT
AAGTTATGATAAGGTATCTTTATTTGTTTGATCAGTAATTATTACTGCAGTATTATTATTATTATCATTACCTGTATTAG
CAGGTGCTATTACTATACTTTTAACTGATCGAAATTTTAATACTTCTTTTTTTGATCCTGCTGGAGGTGGTGATCCTATT
TTATTTCAGCATTTGTTT
>SSEIC4641-13|Araneae|COI-5P
GAGTTTGTACTTTATTTTTGGGGCTTGAGCTGCAATAGTAGGAACAGCGATAAGAGTATTAATTCGAGTTGAGTTGGGAC
AAGTTGGTAGATTGTTGGGTGACGATCAGTTATATAATGTTATTGTTACTGCGCATGCTTTTGTAATAATTTTTTTTATA
GTTATGCCTATTTTAATTGGGGGATTTGGTAATTGATTAGTACCTTTAATATTAGGGGCACCGGATATAGCTTTTCCTCG
GATAAATAATTTAAGATTTTGATTATTGCCCCCTTCTTTACTCTTGTTGTTTATTTCAAGTATGGATGAAATAGGGGTAG
GGGCAGGTTGAACTGTGTATCCTCCTCTTGCTTCTTTAGAGGGACATTCCGGTAGTTCAGTGGATTTTGCTATTTTTTCT
TTGCATTTAGCTGGGGCGTCTTCCATTATGGGGGCTATCAATTTTATTTCTACTATTTTAAATATACGAGGGTATGGGAT
AACTATGGAAAAGGTTCCATTATTTGTGTGATCTGTTTTAATTACAGCTGTTTTATTACTTCTGTCGCTCCCTGTGTTGG
CAGGAGCGATTACTATACTTTTAACAGATCGAAATTTTAATACATCATTTTTTGATCCATCTGGGGGAGGGGAC
>SISAF439-12|Ixodida|COI-5P
AACAATATATTTAATTTTTGGAGCTTGATCAGGAATATTAGGGTTAAGAATAAGAATATTAATTCGAATAGAATTAGGTC
AACCAGGAACTTTAATTGGTAATGATCAAATTTATAATGTAATTGTAACTGCTCATGCATTTATTATAATTTTTTTTATA
GTAATACCTATTATAATTGGAGGATTTGGAAACTGATTAGTTCCTATTATAATTGGGGCTCCAGATATAGCATTTCCTCG
AATAAATAATATAAGATTTTGACTTCTTCCTCCTTCTTTATTTTTACTAATTAATTCTTCTTTAGTAGAATCTGGAGCTG
GAACAGGATGAACAGTTTATCCTCCTTTATCCTCAAATCTTTCTCATTATGGGCCTTCAGTAGATCTTGCAATTTTTTCT
TTACATCTTGCAGGAGCATCTTCAATTTTAGGGGCAATCAATTTTATTACAACTATTATCAACATACGTTCTATTGGAAT
AACTATAGAACGAATACCTTTATTTGTTTGATCAGTTTTAATTACAGCTATTTTACTGTTATTATCATTACCAGTTTTAG
CTGGTGCTATTACAATATTATTAACAGATCGAAACTTTAATACCTCATTCTTTGACCCTTCAGGGGGAGGAGATCCAATT
TTATACCAACATTTATTC
>SPDAR310-13|Araneae|COI-5P
GACTCTATATTTAATATTTGGTGTTTGAGCTGCCATAGTAGGAACTGCCATAAGAGTATTAATTCGAATAGAACTTGGAC
ATAGAGGAAGATTTTTAGGTGATGATCATTTATATAATGTTATAGTGACTGCTCATGCTTTTGTGATGATTTTTTTTATA
GTAATACCTATTTTAATTGGTGGTTTTGGAAATTGATTAGTTCCATTAATATTAGGAGCACCTGATATATCATTTCCGCG
AATAAATAATCTTTCTTTTTGGTTATTACCTCCTTCATTATTTTTATTATTTATATCATCTATAGTGGAAATAGGAGTTG
GAGCAGGATGAACAGTTTATCCTCCATTAGCTTCTTTAGTAGGACATATAGGAAGATCTATAGATTTTGCTATTTTTTCT
TTACATTTAGCAGGAGCTTCTTCTATTATAGGTGCTGTAAATTTTATTTCTACTATTATTAATATACGATTAGTAGGAAT
GTCTATGGAAAAAGTATCCTTGTTTGTTTGGTCAGTCTTAATTACTGCTGTTTTATTACTTTTGTCATTACCTGTATTAG
CAGGTGCAATTACTATATTATTGACTGATCGAAATTTTAATACTTCTTTTTTTGACCCAGCTGGAGGTGGGGATCCTATT
TTATTTCAACATTTATTT
>GBCH5190-10|Hygrobatesfluviatilis|COI-5P|FJ668589
ATCCGCTTAGAATTAGGGCAACCAGGGTCTTTAATTGGAAATGACCAAACTTACAACACCATAGTGACTGCACATGCCTT
TATTATAATTTTTTTTATAGTTATACCAATAATGATCGGAGGGTTCGGTAATTGATTAGTCCCCCTTATGCTAAGAGCCC
CTGATATAGCTTTCCCTCGAATAAACAATATGAGCTTCTGACTTCTACCCCCTGCTTTATTACTACTAATATCAAGATCT
ATAGCCTCTGTCGGAGCCGGAACAGGATGAACAGTATACCCCCCTTTATCAGGGAATACAGCACATAGAGGAATTTCAGT
TGACCTCACCATTTTCTCTTTACATTTAGCCGGAATTTCTTCTATTATAGGAGCTATTAATTTCATAGTTACAATTTTAA
ACATAAAACCCAAACATATAAATTTATCAAGAATACCCTTATTCGTATGATCAATTTTCATCACAGTTATTCTTCTTCTC
CTTTCCCTTCCAGTCTTAGCTGGTGCAATCACAATACTACTAACTGACCGAAATTTTAACACTTCATTCTTTGACCCAGC
TGGGGGAGGGGACCCTATTCTTTACCAACATTTATTTTGA
>SSPAA8425-13|Mesostigmata|COI-5P
AACTTTATATTTTTTATTTTCTTTATGAGCAGGACTACTAGGAAGCTCTATAAGAATAATTATTCGCATTGAGTTGGCTC
AACCAAGAGGCTTGATCAAAGATGACCATATTTTTAATGTAATTGTAACAGCTCATGCCTTTGTTATAATTTTTTTTATA
GTTATACCTGCTATAATTGGGGGATTTGGAAATTGACTAATTCCTCTAATATTAAATGTGCCCGATATGGCATTCCCTCG
AATAAATAATATAAGATTTTGACTTCTCCCTTTTTCTTTAATATTTTTAATTTTTTCATCTCTAATTGATGGAGGCGCTG
GCACAGGATGAACTGTTTATCCGCCCTTAGCAAGAAATATCTCTCATAGGGGTGCTTCTGTTGATTTAGCTATTTTTAGT
CTTCATATTGCTGGAGCAAGTTCAATCTTAGGATCTGTAAACTTTATTTCTACTATTATAAACATACGCCCAGTAAGAAT
AACATTAGAACGACTCTCACTTTTTGCATGATCGGTATTAATTACAACAATTCTTCTATTATTAAGTCTCCCAGTCTTAG
CTGGAGCTATCACCATACTTCTCAGAGACCGAAACTTTAATACTACCTTCTTTGACCCCTGTGGGGGCGGTG
>CNPCB089-13|Sarcoptiformes|COI-5P
AACTTTGTATTTTATTTTTGGAGCTTGAGCCGGTTTGCTGGGTTCTGCTTTAAGAGCTTTAATTCGTTTAGAATTGGGTC
AACCAGGATCTCTCATGGAAAATGATCAAATCTATAATACTATTGTAACAGCTCATGCTTTTGTCATAATTTTTTTTATA
GTTATACCAGTTATAATTGGAGGTTTCGGAAATTGATTAGTACCTATAATAATTGGAGCTCAAGATATGGCTTTTCCTCG
AATAAACAATATAAGCTTTTGGTTACTACCCCCCTCTTTGACATTACTATCAGCTTCTGCTTTTGCGGGGGTGGGGGCCG
GCACAGGTTGAACAGTATACCCTCCCCTATCAGGAAATATATTCCACTCTGGAATTTCAGTAGATCTCGCTATTTTCAGA
CTACACCTTGCGGGAGCCTCTTCTATTTTGGGTGCTATTAATTTTATTACAACTATTATAAATATACGATCTTCTTCCAT
AACTTTAGATTCTATCCCTCTTTTTGTGTGGTCTGTTTTAATTACGGCAGTATTGTTACTACTATCTCTCCCCGTTTTAG
CCGGAGCTATCACTATATTGTTAACAGATCGAAATTTTAATACTTCTTTTTTTG
>SPINO057-09|Araneae|COI-5P|GU657477
TAGATTATATTTTATATTTGGTGTTTGGGCTGCTATAGTTGGGACTGCAATAAGAGTTTTAATTCGTATCGAGCTAGGTC
AAACTGGAAGATTTTTGGGGGATGACCAGTTGTATAATGTTATTGTTACTGCTCATGCTTTTGTTATAATTTTTTTTATA
GTTATGCCTATTTTGATTGGGGGGTTTGGTAATTGGTTGGTGCCGTTAATATTAGGGGCTCCAGATATGGCTTTCCCTCG
CATAAATAATTTAAGATTTTGGCTACTTCCCCCTTCGTTGTTCATATTGTTTATTTCCTCTATGGTAGATGTAGGGGTGG
GTGCTGGCTGGACTGTGTATCCCCCTTTAGCTGGGCTAGAAGGGCATTCTGGAAACTCTGTAGATTTTGCTATTTTTTCT
CTTCATCTAGCGGGGGCATCTTCTATTATGGGGGCTATTAATTTTATTTCTACTATTATTAATATGCGAATGAGTGGGGT
TACTATAGAAAAAGTCCCTTTATTTGTCTGATCTGTTTTAATTACAGCAGTACTTCTTCTTCTTTCTTTACCTGTTTTAG
CGGGGGCTATTACAATGCTATTAACTGATCGAAATTTTAATACGTCTTTTTTTGACCCTTCTGGGGGGGGAGATCCTATT
TTATTCCAGCATTTGTTT
>GMGLD1488-13|Trombidiformes|COI-5P
AACCCTATACTTTGCTCTGGGGGTATGGGCCGGAGTAATAGGAACAAGCCTAAGAATAATTATTCGATTTGAACTATCAC
AACCCACCACAATATTAGGAAACGACCAAACTTACAATTCAATCGTAACAGCCCACGCATTTATTATAATCTTTTTTATA
GTCATACCTACCATGGTGGGAGGATTTGGCAACTGACTAACCCCCATACTTATTGGTGCACCAGATATAGCATTCCCCCG
CTTAAACAACATAAGATTTTGACTTCTAATCCCTTCCCTATCGCTTCTGTCAATATCACTATTCACATCCACCGGAGTCG
GCACAGGCTGAACAGTCTACCCACCCTTATCAGGAAATATCGCCCACGCAGGATCCGCCGTAGATCTTGCCATTTTCTCC
CTCCATCTCGCAGGAATCTCATCAATTCTTGGAGCCATTAACTTTATAGCAACAATTACCAACATGCCCCTTAAGTCAAA
CAAATGAGAAGCCCTCCCCCTATTCGTGTGATCAATTCTAATCACAGCAATTCTTCTCTTATTATCACTACCTGTTTTAG
CCGGGGCCATCACCATACTATTAACGGACCGAAATTTTAACACCTCATTCTTC
>MYMCG228-12|Oppiidae|COI-5P|JX834217
AACTTTATATTTTATCTTTGGAGCTTGAGCAGGACTGTTAGGGTCAGCATTAAGTGCCCTAATCCGTTTAGAGCTTGGAC
AGCCTGGTTCCTTAATAGAAAACGACCAAATTTACAACACCATTGTAACGGCACACGCCTTTGTAATGATTTTTTTTATA
GTTATGCCAATTTTAATCGGAGGGTTTGGCAATTGGCTTGTTCCAATGATAATTGGGGCCCAAGATATGGCTTTCCCTCG
AATAAATAACATAAGATTTTGATTGCTGCCACCTTCTCTATCTTTATTATCCATTTCTGCTTTTGCTGGTGCTGGTGCTG
GAACTGGTTGAACTGTATATCCACCGTTGGCAGGAAACCTATTCCATTCTGGAATCTCAGTAGACCTAGCAATCTTTAGA
TTACATCTTGCTGGAGCATCTTCCATTTTAGGAGCAATTAACTTTATCACCACAATCATAAACATACGATCAGCCTCTAT
ATCTTTAGATTCTATTCCACTATTTGTTTGATCTGTCCTAATCACAGCAGTATTACTGCTCCTGTCACTCCCAGTACTGG
CTGGAGCCATTACTATACTATTAACAGACCGTAACTTTAACACATCCTTCTTTGACCCTTCCGGTGGGGGAGACCCAATT
TTATACCAACATTTGTTC
>MASPD582-10|Araneae|COI-5P|JF884371
GACTTTATATTTAATTTTTGGTGCTTGAGCTGCTATAGTTGGAACTGCTATAAGAGTATTGATTCGAATTGAATTAGGAC
AATCAGGAAGATTTTTGGGAGATGATCAGCTTTATAATGTAATTGTTACGGCGCATGCGTTTGTAATAATTTTTTTTATA
GTAATACCTATTTTAATTGGAGGTTTTGGTAATTGATTGGTTCCTTTAATGTTAGGTGCTCCTGATATAGCTTTTCCTCG
AATAAATAATTTGAGTTTTTGATTATTACCTCCTTCTTTATTTTTATTAATTATTTCTTCAATAGTAGAAATAGGGGTTG
GTGCTGGATGAACAGTTTATCCTCCTTTAGCTAGTTTAGAGGGTCATTCTGGAAGATCTGTTGATTTTGCTATTTTTTCT
CTTCATTTGGCTGGGGCTTCTTCAATTATAGGAGCTATTAATTTTATTTCTACTATTATTAATATGCGATTTTATGGGAT
AACAATGGAAAAAGTTCCTTTATTTGTTTGATCTGTATTAATTACTGCTGTGTTATTATTACTTTCTTTACCTGTATTGG
CTGGAGCAATTACTATATTATTAACAGACCGAAATTTTAATACCTCATTTTTTGACCCTTCTGGGGGAGGGGATCCTATT
TTGTTTCAACATTTATTT
>SSWLF3028-13|Sarcoptiformes|COI-5P
AACTTTATATTTTATTTTTGGAGCCTGAGCTGGACTTTTAGGTTCTGCCTTAAGAGCTCTAATTCGTCTTGAATTAGGAC
AACCCGGATCGTTATTAGAAAATGACCAAATTTATAACACTATTGTCACAGCCCACGCCTTCGTGATAATTTTCTTTATG
GTAATACCTGTAATAATTGGAGGTTTTGGAAATTGACTAGTTCCAATAATAATTGGGGCACAGGATATAGCCTTTCCTCG
AATGAATAACATAAGCTTCTGGCTTTTACCCCCTTCTCTATCCTTACTATCTGCCTCAGCTTTTGCCGGAATAGGAGCTG
GAACCGGTTGAACAGTATATCCACCATTAGCTGGGAATCTTTTTCATTCTGGAATCTCAGTAGACTTAGCCATTTTTAGG
TTACATTTAGCGGGAGCATCCTCAATTTTAGGAGCTATTAACTTTATCACTACAATTATAAATATACGTTCGTCTTCTAT
AACTTTAGATTCAATTCCTTTATTTGTATGATCAGTTTTAATTACAGCTGTTTTACTTTTGTTATCTCTTCCAGTTTTAG
CAGGAGCTATCACGATACTTTTGACAGATC
>GBCH0892-06|Cicurinavarians|COI-5P|AY633048
TTAAGATTTTGACTTCTTCCTCCTTCTTTATTAATATTATTTATTTCTTCTATAGTAGAAATGGGTGTGGGTGCAGGATG
AACTATTTATCCACCTTTAGCATCAAGAATTGGCCATGCTGGCTCTTCTGTGGATTTTGCTATTTTTTCTTTACATTTAG
CCGGAGCGTCATCGATTATGGGTGCTGTAAATTTTATTTCTACTATTATTAATATACGTTCTTACGGAATGAGAATAGAA
AGGGTTCCTTTATTTGTATGATCAGTATTGATTACTGCTGTTCTCTTATTGTTGTCTTTGCCTGTTTTAGCAGGGGCTAT
TACTATATTATTAACTGATCGAAATTTTAATACTTCTTTTTTTGATCCTGCGGGTGGAGGAGATCCTATTTTATTTCAAC
ATTTGTTTTGATTTTTTGGACATCCGGAAGTATATATCTTAATTTTACCAGGATTTGGGATTGTGTCACATGTGATTTCA
TTTTCTGTTGGTAAACGTGAGCCGTTTGGAAGTTTAGGAATAATTTATGCAATAGTAGGAATTGGTGGAATAGGATTTGT
TGTATGGGCGCATCATATATTTTCTGTTGGAATAGATGTTGATACTCGTG
>SPITO261-12|Araneae|COI-5P
GACTTTATATTTATTATTTGGAGCTTGATCTGCTATGGTTGGTACTGCAATAAGAGTATTAATTCGAATTGAATTAGGGC
AACCTGGTAGATTTTTGGGAAATGATCAATTATATAATGTTATAGTTACTGCTCATGCTTTTGTTATGATTTTTTTTATA
GTAATACCTATTTTGATTGGAGGGTTTGGAAATTGATTAGTTCCTTTAATATTGGGTGCGCCTGATATAGCTTTTCCTCG
GATGAATAATTTGAGTTTTTGATTGTTGCCACCTTCTTTATTATTGCTTTTTATTTCTTCTATGGTTGAAATAGGGGTTG
GAGCTGGATGAACAATTTATCCTCCTTTGGCTTCTGTGGTTGGTCATTCCGGTAGTTCTGTGGATTTTGCTATTTTTTCT
TTACATTTAGCTGGAGCTTCTTCTATTATAGGTGCTATTAATTTTATTTCTACTATTATTAATATACGTGTAGAAGGAAT
AACAATGGAAAAAGTTCCATTATTTGTTTGATCGGTTTTGATTACAGCAGTTCTTTTATTATTATCTTTGCCTGTTTTAG
CAGGTGCTATTACTATATTGTTGACTGATCGAAATTTTAATACATCTTTTTTTGATCCTGCAGGAGGGGGAGATCCTATT
TTGTTTCAACATCTATTT
>MASPD231-10|Araneae|COI-5P|JN306142
GACTTTATATTTAATTTTTGGTGCATGAGCTGCTATAATAGGGACAGCTATAAGAGTATTAATTCGAATTGAGTTAGGTC
AGCCAGGTAGATTTATAGGTGATGATCAATTATATAATGTAATCGTTACTGCTCATGCTTTTGTAATAATTTTTTTTATG
GTAATGCCTATTTTGATTGGTGGATTTGGAAACTGACTAGTCCCTCTAATATTAGGGGCTCCTGATATGGCTTTTCCTCG
AATAAATAATTTAAGATTTTGATTACTACCTCCTTCATTATTTTTACTAATTACATCATCATTAGTAGAAATAGGAGTAG
GGGCAGGTTGAACAGTATATCCTCCATTAGCGGGTTTAGAAGGTCATGCTGGGAGATCTGTAGATTTTGCTATTTTTTCT
TTACATTTGGCCGGAGCATCTTCAATTATAGGTGCTATTAATTTTATTTCAACTATTATTAATATACGTTTTTATGGAAT
AACTATGGAAAAGGTACCTTTATTTGTCTGGTCAGTATTAATTACTGCAGTTTTATTATTGTTATCTTTACCTGTATTAG
CGGGTGCTATTACTATATTATTAACTGATCGAAATTTTAATACTTCTTTTTTTGACCCTTCAGGAGGAGGAGATCCAATT
TTATTTCAACATTTATTT
>SSBAC2367-12|Trombidiformes|COI-5P
GACGATTTACTTTGCTTTCGGAGCCTGATCAGGGATAGTCGGGGCAAGTTTAAGAACTTTAATTCGCCTAGAACTAGGGC
AACCAGGGGCATTACTAGAAAACAATCAAATCTATAATGTGATTGTGACTGCCCACGCCTTTGTCATAATCTTCTTCATA
GTTATACCAATAATAATTGGCGGGTTTGGGAATTGACTGGTACCAATTATACTCTCCGCCCCAGACATAGCATTCCCCCG
AATAAATAATATAAGCTTTTGGCTACTCCCCCCAGCCCTAATCCTTCTTTTAACTAGCTCCCTTGCTTCAGTAGGGGCAG
GGACGGGTTGGACAGTTTACCCACCACTTTCCACAAATTTAGCTCATGCTGGACCTTCTGTGGACTTAACAATTTTCTCC
CTTCATCTAGCAGGTATCTCTTCAATTTTAGGGGCTATTAATTTTATAGCAACGATCTTCAATATAAAGCCAAAGTCTAT
AAAGATAGAGCAAATCCCTCTATTTGTCTGATCAATCTTATTCACAACTATTCTCTTACTATTAGCTCTCCCAGTTTTAG
CTGGGGCCATTACTATACTTTTAACAGATCGAAACTTTAACACTTCCTTTTTTGACCCCGCTGG
>BBUSE2913-12|Araneae|COI-5P
AACTTTGTATTTGATTTTTGGGGCTTGGGCTGCTATAGTGGGTACAGCTATAAGAGTTTTAATTCGTACTGAATTAGGGC
AACCAGGAAGTTTATTGGGTGATGACCAATTATATAATGTTATTGTGACTGGTCATGCTTTTGTTATAATCTTTTTTATG
GTTATACCGATTTTAATTGGGGGATTTGGAAATTGGTTAGTTCCTTTGATATTAGGAGCACCAGATATGGCTTTTCCTCG
AATAAATAATTTGAGATTTTGATTATTACCATCATCTTTAATTTTATTATTTATTTCGTCTCTGGAAGAGGTTGGAGTTG
GAGCTGGGTGAACAATTTATCCTCCCTTATCTAGATTAGAAGGACATAGAGGAAGTTCTGTGGATTTTGCTATTTTTTCT
CTACATTTGGCGGGTGCTTCATCTATTATAGGGGCTATTAATTTTATCTCAACAATTATGAATATGCGTCTGGTGGGAAT
ATCGATGGAAAAGGTTAGATTATTCGTATGGTCTGTATTAATTACAGCGGTGTTATTATTATTATCTTTACCTGTATTAG
CAGGAGCTATTACTATGCTTTTAACTGATCGTAATTTTAATACTTCTTTTTTTGATCCTGCCGGAGGAGGTGATCCTATT
TTGTTTCAGCATTTGTTT
>MASPD658-10|Araneae|COI-5P|JF884435
AACTTTATATTTAATTTTTGGTGCTTGATCTGCTATAGTTGGGACTGCTATGAGAGTTTTAATTCGAGGGGAATTAGGGC
AGGCTGGAAGATTGCTAGGGGACGATCATATATATAATGTGATCGTAACTGCTCATGCTTTTGTTATGATCTTTTTTATG
GTTATACCTATTTTGATTGGGGGGTTTGGGAATTGATTGGTTCCTTTGATGTTGGGGGCCCCTGATATAGCTTTCCCTCG
GATAAATAATTTGAGTTTTTGGTTGCTTCCCCCATCTTTGTTCTTGTTGTTTATTTCTTCTTTGGCTGAGGTTGGTGTTG
GGGCTGGGTGAACTGTGTATCCTCCTCTTGCTAGAACTGTTGGGCATGCCGGGAGTTCAATAGATTTTGCTATTTTTTCT
TTACACCTTGCTGGTGCGTCTTCTATTATAGGGGCTATTAATTTTATCTCTACTATTATTAATATACGTTCTAGAGGAAT
AACAATAGAAAAAGTTCCTTTATTTGTGTGGTCTGTTTTAATTACTGCTGTTTTATTGTTGTTGTCTCTTCCTGTATTGG
CTGGGGCTATTACTATACTTTTAACTGACCGAAATTTTAACACGTCTTTTTTTGACCCAGCAGGGGGAGGGGATCCTGTG
TTGTTTCAACATTTGTTT
>MYMCG380-12|Eupelops|COI-5P|JX835747
AACTCTTTATTTTGTTTTTGGTGCTTGAGCAGGTTTACTTGGTTCAGCCTTAAGAGGTCTAATTCGTTTAGAACTAGGAC
AACCTGGTTCATTAATAGAAAATGATCAAATTTACAATACTATCGTAACAGCGCATGCTTTCGTCATAATTTTCTTTATA
GTGATACCTGTTATAATCGGAGGATTTGGTAATTGACTTGTTCCAATAATGATCGGAGCTCAAGACATAGCATTCCCTCG
AATGAATAACATAAGATTTTGATTACTTCCTCCTTCTTTAGCTTTACTTTCTTCATCAGCTTTTGCTGGGATAGGTGCCG
GAACGGGTTGAACGGTGTACCCTCCTTTAGCTGGAAGCCTTTTTCATTCAGGATTTTCTGTAGACCTCGCTATTTTCAGA
TTGCATCTTGCAGGGGCTTCCTCTATTCTAGGTGCCATTAATTTTATTACTACAATTTTAAACATACGATCTTCTTCTAT
AACACTGGATTCTATCCCTTTATTTGTCTGATCTGTTTTAATTACAGCTGTTCTATTACTTTTGTCTCTTCCAGTCTTAG
CAGGAGCTATCACGATACTTCTTACAGATCGTAATTTTAACACTTCATTTTTTGATCCTTCAGGGGGAGGAGACCCAATC
CTTTATCAGCACTTATTC
>TURAR1201-10|Araneae|COI-5P|HQ982700
AACTTTATATTTAATGTTTGGAGCTTGATCTGCTATAGTTGGAACTGCTATAAGTGTATTAATTCGAGTGGAGTTAGGAC
AGCCTGGTAGTTTGTTAGGGGATGATCAATTATACAATGTTATTGTAACTGGTCATGCTTTTGTTATGATTTTTTTCATA
GTTATACCAATTTTAATTGGAGGGTTTGGAAATTGATTAGTACCTTTAATATTAGGGGCTCCTGATATAGCTTTTCCTCG
AATGAATAATTTGAGATTTTGATTATTGCCTCCTTCGTTAATATTGTTATTTATTTCTTCTATAGAGGAAATAGGGGTTG
GAGCGGGATGAACTATTTATCCCCCTTTGTCTTCTTTGGAAGGACATAGAGGGAGTTCAGTAGATTTTGCTATTTTTTCT
CTACATTTAGCTGGGGCTTCTTCTATTATAGGGGCTATTAATTTTATTTCTACTATTCTAAATATACGGATGTATGGTAT
AAGAATGGAAAAGGTTAGATTGTTTGTATGATCAGTATTTACTACTGCAGTATTATTACTATTATCATTGCCTGTATTAG
CTGGGGCTATTACTATACTTTTAACAGATCGAAATTTTAATACTTCTTTTTTCGATCCTGCTGGAGGAGGAGATCCTATT
TTATTTCAACATTTATTT
>SSBAD3107-12|Arachnida|COI-5P
GACATTATATTTTATTTTTGCTATATGGGCAGGGATATTTGGTACGTCCTTAAGATTAATTATTCGTCTTGAATTAGGTC
AATCTGGGGGTTTAATAGAGGATGGGCAATTATATAATATGGTTGTTACTTCTCATGCTTTAGTTATGATTTTTTTTATG
GTTATACCTGCTATGTTGGGGGGGTTTGGGAATTGATTGGTGCCTATTATAATTTCATCACCTGATATAGCTTTTCCTCG
GATGAATAATTTAAGTTTTTGGTTGTTAATTCCTTCTTTTATGTTTTTAATTCAATCTTCAATAATTAGAGAAGGGGCGG
GCACTGGATGAACTATTTATCCTCCTTTATCTAGAATTATGTTTCATAGAAGCGGGGCAGTAGATTTTGCAATTTTTTCA
TTGCATTTAGCGGGGGCTTCATCAATTTTAGGGGCTATTAATTTTATTAGGACAATTATAAATATACGTTTATCTTATAT
ATGATTAGAACGTGTGCCTCTTTTTGTCTGGTCAATTTTAATTACGGTAGTTTTATTGTTAGTTAGATTACCAGTTTTAG
CAGGGGCTATTACTATATTATTAACAGATCGAAATTTTAATACGTCTTTTTTTGATCCCAGAGGGGG
>SPICA627-10|Araneae|COI-5P|JF885811
AACTTTATATTTAATTTTTGGGGCATGAGCAGCTATAGTGGGAACAGCAATGAGTGTATTGATTCGAATTGAATTAGGTC
AACCTGGTAGATTTATAGGGGATGATCAGCTTTATAATGTAATTGTAACTGCGCATGCATTTGTAATAATTTTTTTTATA
GTAATGCCAATCTTGATTGGGGGATTTGGAAATTGGTTGGTTCCCTTAATATTAGGTGCCCCTGACATAGCGTTTCCTCG
AATAAATAACTTAAGGTTTTGATTATTACCACCATCTTTATTTCTTTTAATTGTTTCTTCTATAGTTGAGATAGGGGTTG
GTGCTGGTTGAACCGTATATCCTCCTTTGGCTGGATTAGAGGGGCATGCTGGGAGATCTGTAGATTTTGCAATTTTTTCT
TTACATTTAGCTGGGGCTTCATCTATTATGGGGGCTATTAATTTCATTTCTACAATTATTAATATACGATTTTATGGAAT
GACCATAGAAAAAGTCCCTTTGTTTGTATGGTCGGTATTAATTACGGCTGTATTATTATTATTATCCTTGCCCGTATTAG
CAGGTGCTATTACTATATTGTTAACTGATCGAAATTTTAATACATCGTTTTTTGATCCTTCCGGAGGGGGAGATCCAATT
TTGTTTCAGCATTTATTT
>SPICA1384-10|Araneae|COI-5P|JF884956
AACTTTGTATTTTATTTTTGGGGCTTGAGCTGCCATAGTAGGAACTGCTATAAGAGTTTTAATTCGAATTGAGCTTGGAC
AAACAGGAAGAATACTTGGTGATGACCAATTGTATAATGTTATTGTTACTGCCCACGCTTTTGTAATAATTTTTTTTATG
GTTATACCTATTTTAATTGGGGGGTTTGGAAATTGGTTAGTCCCTTTAATGTTAGGGGCTCCTGATATGGCATTTCCTCG
AATAAATAATTTGAGTTTTTGATTATTACCCCCTTCTTTGTTATTATTATTTATTTCTTCTATGGTTGAGATAGGTGTTG
GGTCAGGGTGAACTGTTTATCCCCCCTTGTCTTCGTTAGAAGGCCATTCGGGGAGATCTGTTGATTTTGCTATTTTTTCT
CTTCATTTAGCTGGTGCTTCTTCAATTATAGGAGCTATTAATTTTATTTCGACTATTTTAAATATGCGGGCTTATGGAAT
TAGAATAGAAAAGGTGTCTCTATTTGTTTGATCAGTTTTAATTACTGCTGTTCTTTTGCTATTATCTTTACCTGTTTTAG
CTGGCGCTATTACTATATTGTTAACTGATCGAAATTTTAATACATCTTTTTTTGACCCGGCGGGGGGTGGTGATCCTATT
TTATTTCAACATTTATTT
>CNGLC080-13|Mesostigmata|COI-5P
AACCATGTATATAATTTTTGCTAGATGAGCCGGAGTTCTAGGAACAGCTCTAAGTTTAATCATTCGAACAGAACTTGGAC
AACCCGGATCATTAATCGGAGATGATCAAATTTATAACTCTATTGTTACTGCTCATGCTTTCGTTATAATTTTTTTTATG
GTTATGCCTGCTATAATCGGCGGATTTGGAAATTGAATAGTACCACTAATAATCAGAGCCCCCGATATGGCCTTCCCTCG
AATAAATAATCTAAGATTTTGATTACTGCCTCCCAGTTTATTCCTATTATTAAGAAGATCTATAGTAGAATCTGGTGTAG
GTACTGGATGAACTGTTTACCCGCCATTAGCCAGAAACATCAGCCATAGAGGAAGAGCTGTAGATCTAGCAATTTTTAGA
CTTCATTTAGCAGGAATCTCTAGTATTCTAGGATCTATTAACTTTATCTCAACTATCATAAACATACGCCCCTACAGCAT
ACCCCTAGAGCGTATACCCCTATTCGTTTGATCTGTTTTAATTACTACAATTCTTCTTTTACTAAGATTACCAGTATTAG
CTGGAGCTATCACAATACTTCTAACAGACCGGAATTTTAATACTTCATTTTTCGACCCAAGAGGAGGAGGAGATC
>SPIRU1966-12|Araneae|COI-5P
GAGTTTATATTTTGTTTTTGGAGCTTGGGCTGCTATAGTAGGAACAGCAATAAGAGTATTAATTCGGATTGAGCTAGGGC
AGGTTGGTAGATTATTAGGGGATGATCAATTGTATAATGTTATTGTTACGGCGCATGCTTTTGTTATGATTTTTTTTATA
GTTATACCTATTTTGATTGGGGGATTTGGAAATTGGTTAGTGCCTCTTATGTTAGGAGCACCAGATATAGCTTTTCCTCG
AATAAATAATTTAAGATTTTGGTTATTACCTCCTTCTTTGTTTTTGTTATTTATTTCAAGAATAGATGAGATGGGAGTAG
GGGCAGGTTGGACAGTGTATCCTCCTCTTGCTTCTTTAGAGGGGCATTCTGGCAGATCAGTAGATTTTGCTATTTTTTCT
TTGCATTTAGCTGGGGCGTCCTCTATTATAGGGGCCATTAATTTTATTTCAACGATTTTCAATATACGTGGTTATGGGAT
AACAATAGAAAGGATGCCTTTATTTGTTTGATCTGTGTTAATTACTGCTGTTTTATTATTGTTGTCGTTGCCAGTTTTGG
CGGGGGCTATTACTATACTCTTAACAGATCGAAATTTTAATACGTCATTTTTTGATCCTTCGGGTGGGGGGGACCCTGTT
TTATTTCAACATTTATTT
>PPELE635-11|Araneae|COI-5P
AACTATGTATTTTTTGTTTGGAGCTTGATCTGCTATAGTAGGTACTGCTTTAAGAGTGATTATTCGAGTGGAGTTAGGAC
AAGGAGGAAGATTTTTAGGGGATGATCATTTATATAATGTTGTAGTAACTGCTCATGCGTTAATTATGATTTTTTTTATA
GTTATGCCTATTTTAATTGGGGGGTTTGGAAATTGATTAGTTCCTTTAATGTTGGGGGCTCCAGATATAGCTTTTCCTCG
TATAAATAATTTAAGATTTTGGCTTCTTCCTCCTGCTATTATGCTTTTATTATTATCTGGTCTTGTAGAAACTGGAGTTG
GAGCAGGATGAACTATTTATCCTCCTTTATCATCTAGAGTAGGGCATAGAGGGGTTTCCATAGATTTTGCTATTTTTTCT
CTTCATTTAGCGGGGGCTTCATCTATTATAGGAGCTATTAATTTTATTTCTACAGTTGTTAATATACGATTAATTGGAGT
GAGAATGGATAAAGTGAGATTGTTTGTTTGATCTGTATTAATTACTGCTGTTCTTTTACTTCTTTCTTTACCTGTTTTAG
CTGGTGCTATTACTATACTTTTGACTGATCGGAATTTTAATACTGCGTTTTTTGACCCTGCTGGAGGAGGGGATCCAATC
TTGTTTCAACATCTTTTT
>SPIRU1486-12|Araneae|COI-5P
TACTTTATATTTATTGTTTGGAGCTTGATCAGCTATAGTGGGAACAGCTATAAGAGTTTTGATTCGAGTTGAATTAGGTC
AACCTGGGAGATTTTTAGGTGATGATCATTTATATAATGTTATTGTTACTTCTCATGCGTTTGTGATAATTTTTTTTATA
GTGATACCTATTATGATTGGGGGTTTTGGAAATTGATTGGTTCCTTTAATGTTAGGAGCTCCCGATATAGCATTTCCTCG
TATGAACAATTTAAGTTTTTGATTATTACCTCCTTCTTTATTTTTATTGTTTATTTCATCTATAGTGGAAATAGGAGTGG
GGGCTGGGTGAACTGTTTATCCTCCTTTAGCTTCTACAGTTGGGCATAGAGGAAGATCTGTAGATTTTGCTATTTTTTCT
TTACATTTAGCGGGGGCTTCTTCTATTATAGGGGCTATTAATTTTATTTCTACTATTTTAAATATACGGGTTATAGGAAT
AAGTTTAGAGAAAATTCCTTTGTTTGTATGATCTGTATTTATTACTGCTATTTTATTGTTATTATCGTTGCCTGTTTTAG
CGGGAGCTATTACTATACTGTTAACTGATCGAAATTTTAATACTTCTTTTTTTGATCCAGCTGGGGGAGGGGATCCAATT
TTATTTCAACATTTATTT
>SPICH368-09|Souessaspinifera|COI-5P|GU684213
AAGTTTATATTTTATTTTTGGAGCTTGAGCTGCTATAGTAGGTACTGCAATGAGAGTATTAATTCGAATCGAGTTAGGTC
AAACTGGAAGCTTATTGGGAGATGATCATTTATATAATGTTATGGTTACGGCTCATGCTTTTGTTATAATTTTTTTTATA
GTGATACCTATTTTAATTGGAGGATTTGGTAATTGGTTGGTTCCTTTAATATTAGGAGCACCTGATATGGCTTTTCCACG
AATAAATAATTTAAGTTTTTGGTTCTTACCTCCTTCTTTATTACTATTGTTTATTTCTAGTATGGATGAGATAGGTGTAG
GAGCTGGATGAACTGTGTATCCCCCCTTAGCTTCATTGGAGGGTCATTCGGGTAGATCTGTAGATTTTGCTATTTTTTCT
TTACATTTAGCTGGGGCGTCATCTATTATAGGGGCTATTAATTTCATTTCTACAATTTTGAATATGCGTGGTTACGGAAT
AACTATAGAAAAAGTTCCTTTGTTTGTTTGATCAGTATTAATTACAGCTGTTTTATTATTATTATCATTGCCTGTATTAG
CAGGTGCTATTACTATACTTTTGACTGATCGTAATTTTAATACATCTTTTTTTGATCCATCTGGTGGAGGTGACCCAGTT
TTGTTTCAACATTTATTT
>SPICA258-10|Araneae|COI-5P|JF885463
TACTTTATATTTAGTATTCGGAGCTTGGTCTGCTATAGTTGGTACTGCTATAAGAGTATTAATTCGGGTTGAATTAGGTC
AACCCGGGAGATTATTGGGGGATGACCAATTGTATAATGTAATTGTAACGGGACATGCTTTTATTATAATTTTTTTTATG
GTGATGCCAATTTTAATTGGCGGTTTTGGGAATTGGTTAGTTCCTTTAATATTAGGAGCTCCTGATATAGCCTTCCCTCG
AATAAATAACTTAAGATTTTGGTTATTACCACCTTCTTTAATATTATTATTTATTTCTTCTATAGAAGAAATAGGAGTAG
GGGCAGGTTGGACTATTTATCCTCCTTTATCTTCTTTAGAAGGTCACAGAGGAAGATCTGTGGATTTTGCTATTTTTTCT
TTGCATTTAGCAGGTGCTTCTTCTATTATAGGGGCGATTAATTTTATTTCTACTATTTTTAATATACGTTTATATGGAAT
AAGATTAGAAAAGGTTAGATTGTTTGTTTGATCAGTTTTGATTACAGCTGTTTTATTATTATTATCATTACCTGTTTTAG
CAGGTGCTATCACTATGTTATTAACTGACCGAAATTTTAATACTTCTTTTTTTGACCCTGCTGGCGGGGGGGATCCTATT
TTGTTTCAACATTTATTC
>SPIFG003-11|Araneae|COI-5P
TACTTTATATTTAATATTTGGAGCTTGATCGGCTATAGCTGGTACAGCTATAAGAGTTTTAATTCGTATAGAATTGGGTC
ATTCTGGTAGATTATTAGGGGATGATCATTTATATAATGTTATTGTAACTGCTCATGCTTTCGTTATAATTTTTTTTATA
GTAATACCTATTTTGATTGGTGGGTTTGGTAATTGGTTAGTTCCTTTAATATTAGGGGCTCCAGATATATCTTTTCCTCG
TATAAATAATTTGTCTTTTTGATTATTACCCCCTTCTTTATTTTTATTGTTTATATCTTCTATAGTTGAAATAGGGGTTG
GTGCTGGTTGAACAGTATATCCTCCATTGGCTTCTAGAATTGGTCATATAGGGATATCTATAGATTTTGCTATTTTTTCT
TTACATTTAGCAGGGGCTTCTTCCATTATAGGGGCTGTTAATTTTATTTCTACTATTGTAAATATACGTTTATTAGGAAT
AGGGATAGAAAAGGTTCCTTTATTTGTTTGATCAGTATTTATTACTGCAATTTTATTATTATTGTCTTTACCTGTATTAG
CAGGAGCTATTACTATATTATTAACTGATCGAAATTTTAATACTTCTTTTTTTGATCCTGCTGGAGGAGGTGATCCTGTT
TTATTTCAGCATTTGTTT
>BBUSE2939-12|Araneae|COI-5P
TACTTTATATTTGATTTTTGGTGCTTGGTCTGCTATAGTTGGTACAGCTATAAGAGTGTTAATTCGATTAGAATTAGGAC
AAGTTGGTAGTTTATTAGGGGATGATCAGTTATATAATGTGATTGTGACGGCTCATGCATTTGTGATAATTTTTTTTATA
GTTATACCAATTTTAATTGGGGGTTTTGGAAATTGATTGGTTCCTTTAATATTGGGTGCGCCGGATATAGCTTTTCCTCG
TATAAATAATCTTAGTTTTTGATTATTACCTCCGTCTTTATTTCTTTTATTTATTTCATCTATAGTTGAAATAGGAGTGG
GGGCTGGATGAACGGTTTATCCTCCTTTGGCTTCTGTAATAGGACATTCTGGAAGAGCGGTGGATTTTGCAATTTTTTCT
TTACATTTAGCTGGAGCTTCTTCTATTATGGGTGCTATTAACTTTATTTCTACTATTATTAATATACGGTCTTATGGAAT
AAGATTTGAAAAAGTTCCTTTGTTTGTGTGATCTGTTTTAATTACTGCTGTGTTGTTATTATTGTCTTTACCAGTTTTAG
CTGGTGCAATTACAATATTATTAACAGATCGAAATTTTAATACATCTTTTTTTGACCCTGCAGGAGGGGGAGATCCTATT
TTATTTCAACATTTGTTT
>SPICA1059-10|Araneae|COI-5P|JF884608
TACTTTATATTTAATTTTTGGAGCTTGATCTGCTATAGTTGGTACAGCTATAAGAGTACTAATTCGGGTTGAGTTAGGTC
AACCTGGAAGTTTTTTAGGCGATGATCATCTATATAATGTAATTGTTACGGCTCATGCTTTTGTTATAATTTTTTTTATA
GTCATGCCTATTATAATTGGAGGATTTGGAAATTGGTTAATTCCTTTAATATTAGGAGCTCCTGATATAGCTTTTCCTCG
TATAAATAATTTAAGATTTTGACTTTTACCTCCTTCTTTATTTTTGTTGTTTATTTCTTCAATAGCAGAGATAGGAGTTG
GGGCTGGATGAACTGTTTATCCTCCTTTGGCTTCTATAGTTGGTCATGCAGGGAGTTCAGTGGATTTTGCTATTTTTTCG
TTACATTTAGCTGGGGCTTCTTCTATTATAGGGGCTATTAATTTTATTTCAACTATTTTAAATATACGTTCTTATGAGAT
AAGAATAGAAAAAGTTCCTTTATTTGTATGATCTGTTTTAATTACGGCTATTTTATTATTACTTTCTCTTCCTGTTTTAG
CGGGAGCTATTACAATATTATTAACAGATCGTAATTTTAATACTTCTTTTTTTGATCCTGCAGGAGGAGGTGATCCTATT
TTATTTCAGCATTTATTT
>SPIRU716-11|Araneae|COI-5P|JF886933
TTCTTTATATTTTATTTTTGGGGCTTGGGCTGCTATAGTAGGGACAGCTATAAGAGTATTAATTCGAATCGAGTTGGGAC
AAACAGGAAGAATGTTGGGGGATGATCAGTTATATAATGTTATTGTCACAGCTCATGCTTTTGTTATAATTTTTTTTATA
GTGATACCTATTTTAATTGGAGGTTTTGGAAATTGGTTAGTCCCTCTTATGTTAGGGGCTCCTGATATGGCTTTTCCTCG
CATAAACAATTTAAGATTTTGGTTGTTGCCCCCTTCTTTATTATTGTTGTTTATTTCGAGTATAGTTGAAATGGGGGTTG
GTGCAGGGTGAACTGTTTATCCTCCACTTGCTTCTTTGGAAGGGCATGCTGGCAGATCGGTTGATTTTGCTATTTTTTCT
CTTCATTTGGCTGGAGCTTCTTCTATTATAGGGGCTATTAATTTCATTTCAACTATTATTAATATGCGGGGGTATGGTGT
TTCTATAGAAAAAGTTCCTCTTTTTGTGTGATCTGTGTTAATTACGGCTGTTTTGTTACTTTTGTCTCTTCCTGTTTTAG
CGGGGGCAATTACTATATTATTAACAGATCGTAATTTTAATACTTCTTTTTTTGATCCAGCTGGGGGGGGTGATCCAGTA
TTATTCCAACATTTATTT
>TICKS231-13|Amblyommatapirellum|COI-5P|KF370888
AACAATATATTTAATTTTTGGAAGATGAGCTGGAATAACTGGATTGTCAATAAGAATGCTAATTCGAATAGAATTGGGAC
AACCTGGGACATTAATTGGTAATGACCAAATTTACAATGTAATTGTTACAGCTCATGCATTTATTATAATTTTTTTCATA
GTAATACCAATCATAATTGGAGGATTCGGAAATTGACTAGTTCCTATTATATTAGGGGCTCCAGATATGGCTTTCCCACG
AATAAACAACATAAGTTTTTGATTACTTCCCCCTTCTCTTTGCTTATTAATTAATTCTTCTCTAGTAGAATCAGGTGCAG
GTACAGGCTGAACAGTTTACCCTCCACTATCTTCTAATATATCTCATTATGGGCCCTCAGTGGATCTTGCTATTTTTTCT
CTTCACCTAGCAGGTGCTTCTTCAATTTTGGGCTCAATTAATTTTATTACTACAATTATTAACATACGTTCATTTGGAAT
GACAATAGAACGAATACCTTTATTTGTATGATCAGTATTTATTACAACTATTTTACTTCTTTTATCTTTACCAGTTTTAG
CAGGAGCTATTACCATATTACTTACAGATCGTAATTTTAATACTTCATTTTTTGACCCTTCAGGCGGAGGAGACCCAATT
TTATATCAACATTTATTC
>JSOIE077-12|Trombidiformes|COI-5P
AACTTTATATTTTATTTTAGGAGTCTGATCTGGTATTTTAGGATTAAGACTAAGAACGGTAATTCGCATAGAATTAAGCC
AACCTGGTCAATTGTTTTCTAGAGACCAAACGTATAACTCAATTGTAACATCTCACGCTTTTATTATGATTTTCTTTATA
GTAATACCAATAATGATTGGAGGATTTGGAAATTGATTAGTACCAATGATAATTGGCGCTCCCGACATAGCTTTCCCACG
TATAAATAATATAAGATTTTGACTCCTACCACCATCCTTATCTCTTCTTCTAATAGCCTCATTCTCATCCATAGGGGTGG
GAACTGGTTGAACAGTATACCCTCCTTTATCCGCCAACTTAGCGCACAGCTCAATATCAATTGAAATAACAATCTTTTCG
CTACATTTAGCAGGAATTTCGTCAATTCTAGGAGCTATTAATTTTTTAGCAACAATTAGAAATATAAAAAGAAAAAGACT
TTCAACAGAAAAAACCCCTTTATTTGTTGTGTCAGTATTAGTAACTGCAGTTCTACTCTTACTATCTTTACCAGTGCTAG
CAGGAGCTATCACAATACTTCTAACTGATCGAAACTTTAACACAACATTTTTTGATCCTTCAGGAGGAGGAGACCCTATT
TTATATCAACATTTATTC
>MASPD1169-13|Araneae|COI-5P
GACTTTATATCTGATTTTTGGGGCTTGGGCTGCTATAGTAGGTACGGCGTTAAGTGTTTTAATTCGGGTGGAATTAGGAC
AGCCGGGTAGATTCATTGGGGACGATCAATTATACAATGTAATTGTTACTGCTCATGCGTTTGTAATAATTTTTTTTATA
GTTATACCTATTTTAATTGGGGGGTTTGGGAATTGATTAGTTCCTTTAATATTGGGTGCGCCTGACATAGCTTTTCCTCG
AATAAATAATTTAAGGTTTTGGTTACTTCCTCCTTCTTTATTTCTGTTATTAATTTCTTCAATAGTCGAGATGGGGGTGG
GGTCCGGTTGAACTGTGTATCCCCCTCTTGCGAGGTTGGAGGGTCATAGTGGGAGTTCTGTAGATTTTGCTATTTTTTCT
TTGCATCTCGCGGGGGCATCTTCTATTATAGGGGCAATAAATTTTATTTCTACTATTATTAATATACGATTTTATGGGCT
AACTATAGAAAAGGTTCCTTTATTTGTATGATCGGTTTTGATCACGGCTGTATTATTATTATTGTCATTGCCTGTCTTGG
CAGGCGCGATTACTATGTTACTTACGGATCGGAATTTTAATACTTCTTTTTTTGATCCTGCCGGGGGGGGGGATCCTATT
TTATTTCAGCATTTATTT
>ARBCM062-13|Araneae|COI-5P
AACTTTGTATTTATTGTTTGGAGCTTGGGCTGCTATAGTAGGTACTGCAATAAGAGTATTAATTCGAATTGAATTAGGAC
AGCCAGGTAGATTTTTAGGTAATGATCAGATTTATAATGTTATGGTTACTGCTCATGCTTTTGTTATAATTTTTTTTATA
GTGATACCTATTTTAATTGGAGGGTTTGGGAATTGGTTGGTTCCTTTAATATTAGGGGCTCCTGATATAGCTTTTCCTCG
TATGAATAATTTAAGATTTTGATTACTGCCTCCTTCTTTATTATTATTATTTATTTCTTCTATAGTAGAAATAGGAGTTG
GGGCAGGATGAACTATTTATCCTCCTTTAGCTTCTGTAGTTGGTCATTCAGGTAGATCTGTGGATTTCGCTATTTTTTCT
TTGCATTTGGCTGGAGCTTCTTCAATTATAGGGGCTATTAATTTCATTTCTACTATTATTAATATACGAATAGAGGGAAT
ATCTATGGAGAAGGTTCCTTTATTTGTGTGATCTGTCTTAATTACTGCAGTTCTTTTACTTTTATCTTTACCGGTTTTAG
CTGGGGCTATTACTATATTATTGACTGATCGTAATTTTAATACATCTTTTTTTGACCCTGCGGGAGGGGGTGATCCTATT
TTATTTCAACATTTATTT
>MASPD576-10|Araneae|COI-5P|JF884366
GACTTTATATTTAATTTTTGGAGTGTGGGCTGCTATAGTTGGAATAGCTATAAGAATTTTAATTCGAATGGAATTAGGAC
AAGTTGGAAGATTTTTAGGAAATGATCATATATATAATGTTATTGTTACTGCTCATGCTTTTGTTATAATTTTTTTTATA
GTTATACCTATTTTAATTGGGGGATTTGGAAATTGATTGGTTCCTTTAATATTAGGAGCTCCGGATATGGCTTTTCCTCG
AATAAATAATTTGAGTTTTTGACTTTTACCTCCTTCTTTTATATTATTACTTATTTCTTCAATAATGGAGATAGGTGTTG
GAGCTGGGTGAACGGTATATCCTCCTTTAGCTTCATTGGTTGGACATGGTGGTAATTCTATGGATTTTGCTATTTTTTCT
TTACACTTGGCTGGGGCTTCTTCTATTATAGGAGCTATTAACTTTATTTCTACGATTATAAATATACGATCAGAATTTAT
AAGAATAGATAGGATTCCTTTATTTGTATGATCTGTAATAATTACTGCTGTTTTACTATTGCTTTCTTTACCTGTATTAG
CAGGTGCTATTACTATATTGTTAACGGATCGAAATTTTAATACTTCTTTTTTTGATCCTGCTGGAGGAGGTGATCCTATT
TTGTTTCAACATTTGTTT
>PMWMC010-07|Trombidiformes|COI-5P
AACTATATATCTAGCCTTTGGAACTTGAGCCGGGGTATTAGGTGCCAGATTCAGACTCCTTATTCGAATAGAACTATCAC
AACCTGGAGGGTTAATAAAAAATGAACAACTATATAATACTATTATCACATCTCATGCTTTCGTAATAATCTTCTTTGCT
GTAATACCTATCCTAATTGGTGGATTTGGAAATTGATTAGTACCTATTATAATAAATTATCCAGACATAGCTTTTCCTCG
AATGAATAACATAAGATTTTGATTACTACCTCCTTCATTATTTCTCTTAATTTCAAGATCAATCGTAGGAATAGGAGCAG
GAACTGGATGAACAATTTATCCACCTTTATCTGATAGAGACTTTCATAGAGATCCCTCTGTAGATCTCATAATCTTTTCT
CTTCATTTAGCAGGAATTTCTTCAATTTTAGGAGGAATTAACTTCTTCATAACCATAACTGTAGAAGAATTAACTTGAAA
AAGCGCAATAAAAATCCCATTATTTGTATGAGCTGTAGCCTTCACAGGTTTATTAATTATCCTTTCGTTACCAATTTTGG
CAAGAGGAATTACTATACTACTAACGGATCGAAACCTAAACAGATCATTTTTTGATCCTTCAGGAGGAGGAGACCCAATT
TTCTTTCAACATATTTTC
>SPICH227-09|Ceraticeluscrassiceps|COI-5P|GU683972
AAGTTTATATTTTATTTTTGGAGCTTGGGCTGCTATAGTTGGAACGGCTATAAGTGTATTGATTCGTATTGAGTTAGGAC
AAACTGGAAGATTGTTAGGGGATGACCAGTTATATAATGTTATTGTTACAGCGCATGCTTTTGTTATAATTTTTTTTATA
GTGATACCTATTTTAATTGGTGGGTTTGGAAATTGACTAGTGCCTTTAATGTTAGGGGCTCCTGATATAGCATTTCCTCG
TATGAATAATTTAAGATTTTGGTTATTACCCCCTTCTTTATTATTATTATTTATTTCCAGAATAGATGAAATGGGAGTAG
GGGCAGGATGAACTGTTTATCCTCCTCTTGCTTCTTTAGAAGGGCATTCTGGTAGATCAGTGGATTTTGCTATTTTTTCT
TTGCATTTAGCTGGGGCTTCATCAATTATGGGAGCTATTAATTTTATTTCTACTATTTTAAATATGCGAGGATATGGAAT
AGGGATAGAAAGGGTTCCTTTGTTTGTCTGATCTGTTTTAATTACAGCTGTGTTATTACTTTTATCTTTGCCTGTATTGG
CCGGGGCTATTACTATGCTTTTGACGGATCGAAATTTTAATACATCATTTTTTGATCCATCAGGAGGTGGGGATCCAGTT
TTATTCCAACACTTATTT
>SSWLA029-13|Sarcoptiformes|COI-5P
TACTTTATATTTTATTTTTGGGGCCTGGGCCGGAATTCTTGGGTCTTCTTTAAGAGCTTTAATTCGATTAGAGTTAGGAC
AACCCGGTTCTTTATTAGAAAATGATCAAATTTATAACACTATTGTCACTGCTCATGCTTTTGTGATAATTTTTTTTATG
GTAATACCAGTCATGATCGGTGGTTTCGGTAATTGGCTTGTTCCTTTAATAATTGGAGCTCAAGATATAGCTTTCCCCCG
GATAAATAATATAAGGTTTTGACTACTTCCGCCTTCTTTAACTTTACTTTCAGTGTCTGCTTTTGCAGGAGCTGGGGCTG
GAACTGGTTGAACAGTATATCCTCCCTTAGCCGGAAATATATTTCATTCCGGTATTTCAGTAGACCTCGCTATTTTTAGT
CTTCATTTAGCAGGAGCTTCTTCTATTTTAGGGGCTATTAACTTTATCACTACTATTATAAACATGCGTTCTTCTTTTAT
TTCATTAGACTCTATACCATTGTTTGTGTGATCTGTGTTGATTACGGCTGTTTTACTTTTATTATCCTTACCTGTTTTAG
CTGGTGCTATCACTATACTTCTAACCGATCGTAATTTTAACACTTCCTTTTTTGACCCATCTGGGGGAGGTG
>MYMCA243-11|Oppiidae|COI-5P|JX837788
AACTCTATACTTTATCTTTGGTGCTTGAGCAGGGCTGCTAGGGTCAGCATTAAGTGCCCTAATCCGGTTAGAACTAGGAC
AACCTGGTTCTTTAATAGAAAACGATCAAATTTACAATACCATCGTAACAGCACACGCCTTTGTCATAATTTTTTTTATA
GTTATGCCAATTTTAATCGGAGGATTCGGTAATTGACTTGTTCCAATGATGATTGGGGCTCAAGACATGGCTTTCCCCCG
AATAAATAACATAAGATTTTGATTATTACCACCTTCTTTATCTTTGCTATCCATTTCTGCTTTTGCGGGGGCTGGGGCTG
GGACTGGTTGAACAGTGTATCCACCACTAGCAGGAAACTTATTCCATTCTGGAATCTCAGTGGATTTGGCAATCTTCAGT
CTCCATCTTGCCGGGGCATCTTCCATTTTAGGGGCAATTAACTTCATCACCACAATTATAAATATACGATCCGCCTCTAT
ATCCTTAGATTCTATCCCACTATTTGTTTGATCTGTTCTAATTACAGCAGTATTACTACTTCTATCCCTCCCAGTATTAG
CAGGAGCCATCACCATATTGCTAACAGACCGTAATTTTAATACATCCTTCTTTGACCCTTCTGGAGGAGGAGACCCAATC
TTGTACCAACATTTGTTT
>MIONB263-10|Trombidiformes|COI-5P
AACTATATATTTTACATTTGGAATATGAGCAGCTTTACTAGGAGCAGCCATAAGAATATTCATTCGAATAAAATTAGGAA
GTCCAAACTTAAATCAAATAAGAGACCAATTTTATAACTCAATAGTAACAGCACATGCTTTTGTAATAATTTTTTTCATA
GTTATACCAATTATAATTGGAGGGTTTGGAAACTGATTAATTCCAATTATAATTGGAGCTCCAGATATAGCTTTCCCACG
AATAAATAATATAAGATTTTGAATACTTCCTCCATCATTATCATTCTTAATTATATCATCTTTTTGTGAAAGAGGAAGAG
GAACTGGATGGACCATCTATCCACCATTATCAAACCAAGCTTTCCATATAGGAAATTCAATAGATTTTACAATTTTTTCT
CTACATATAGCTGGAGCATCCTCAATCTTAGGAGCTATCAATTTCATTACAACAATTATAAATATAAAAGATAAATCAAT
AAAGTTTGAGCAAATTCCATTATTTGTATGATCTGTAATAATTACAGCAATTTTACTATTATTATCCCTACCAGTATTAG
CTGGAGCAATCACAATACTATTAACAGATCGAAATTTTAATACATCATTTTTTGATCCAGCAGGAGGAGGAGATCCTATT
CTATACCAACACTTATTT
>CNPAE437-13|Mesostigmata|COI-5P
ACATTATATTTTGTATTTGCTAGATGAGCGGCTATAGCAGGCTCATCTATAAGCTTGTTTATTCGTATTGAACTTTCTCA
ACCTGGGACTTTTATTGGAGATGACTCTATTTATAATGTAATTGTTACAGCTCATGCTTTTGTTATAATTTTTTTTATAG
TCATACCTGCTATAATTGGAGGGTTTGGAAATTGATTAATCCCCTTAATAATTAGAGCCCCTGATATAGCCTTTCCACGA
ATAAATAATATAAGATTTTGACTTTTACCTCCTTCTTTAACTTTACTTCTTTTATCAAGAATAGTAGAAAGAGGGGCGGG
CACAGGTTGAACTGTTTACCCCCCTTTAGCTGGGAATATTGCGCATAGAGGGAGGTCTGTGGATCTTGCTATTTTTAGTT
TACATTTAGCAGGCATCTCTTCAATTTTAGGAGCAATTAATTTTATTTCTACAATTTTAAATATACGAGCAAAAAATATA
AGTATAGAACAAATACCTTTATTTATTTGATCTGTTTTTATCACTGCAATTTTACTTTTACTTAGTTTACCAGTTCTTGC
AGGAGCAATTACAATATTACTAACAGAT
>MYMCA691-11|Galumna|COI-5P|JX838222
AACTCTTTACTTTATCTTAGGAGCTTGGGCAGGACTTCTGGGTTCTGCCTTAAGTGGTCTTATCCGTTTAGAGCTTGGAC
AACCCGGCTCCCTTCTTGAAAACGATCAAATTTATAATACGGTAGTAACGGCCCATGCTTTCGTTATAATTTTTTTCATG
GTTATACCCGTCATGATTGGGGGGTTCGGGAACTGGCTGGTACCTTTAATGATTGGAGCTCAAGATATGGCCTTCCCTCG
AATAAATAACATAAGATTTTGACTTCTCCCCCCCTCTTTAACTCTGCTAGCATCTTCAGCATTTGCTGGAATAGGGGCGG
GCACTGGTTGAACAGTGTACCCTCCATTAGCTGGAAACTTGTTCCATTCGGGGTTTTCTGTGGATTTAGCTATCTTTAGA
TTACATTTAGCTGGAGCCTCCTCTATCCTGGGGGCCATTAATTTTATCACTACCATTTTAAACATGCGTTCATCATCAAT
AACGTTAGATTCCATCCCCCTATTTGTGTGGTCAGTGCTCATCACAGCGGTTCTCCTTTTACTATCCTTACCTGTATTAG
CAGGTGCTATCACGATGCTATTAACGGATCGTAACTTTAACACATCTTTTTTTGATCCTTCCGGAGGAGGGGATCCTATC
CTATATCAACATTTATTT
>BBUSE1855-12|Araneae|COI-5P
AACTTTATATCTAATTTTTGGTGCTTGATCAGCAATAGTTGGAACGGCGATAAGTGTATTAATTCGAATAGAATTAGGGC
AAACGGGCTCTTTCTTAGGTAATGATCATATATATAATGTTATTGTTACGGCTCATGCTTTTGTTATGATTTTTTTTATG
GTTATACCAATTTTAATTGGAGGATTCGGTAACTGATTAGTTCCTTTAATATTAGGAGCTCCAGATATAGCTTTTCCTCG
TATAAATAATTTAAGTTTTTGACTTTTACCACCTTCTCTTTTATTATTGTTTATTTCTTCTATAGCTGAAATAGGGGTTG
GTGCTGGTTGAACGGTATATCCTCCTTTAGCTTCTGTTGTAGGACATAATGGAAGTTCTGTAGATTTTGCTATTTTTTCT
TTACATTTAGCGGGGGCTTCATCTATTATAGGAGCTATTAATTTTATTTCTACAATTATTAATATACGTTCAATAGGAAT
AAGAATGGAGAAGGTTCCTTTGTTTGTTTGATCGGTGATTATCACTGCAGTATTATTATTATTATCATTACCTGTGTTAG
CAGGTGCTATTACTATATTGTTGACTGATCGAAATTTTAATACCTCTTTTTTTGATCCGGCAGGAGGTGGGG
>BBUSE1318-12|Araneae|COI-5P
TACGTTATATTTTGTTTTTGGAGTTTGATCGGCGATGTTGGGAACAGCTTTGAGAGTTTTGATTCGATTGGAACTTGGTC
AGGTTGGAAGTTTGATAGGTGATGATCAGTTATATAATGTAATTGTGACTGCACATGCTTTAGTAATAATTTTTTTTATA
GTAATGCCTATTATAATTGGTGGGTTTGGAAATTGATTGCTTCCGTTGATGTTAGGGGCTCCGGATATGGCTTTTCCTCG
AATGAACAATTTAAGTTTTTGGTTATTGCCTCCTTCTTTGATTTTGCTGTTGATTTCTTCTATAGTAGATGTGGGGGTAG
GGGCTGGATGAACAATTTATCCTCCACTGTCTTCAAGAATTGGGCATAGAGGATTGTCGGTTGATTTTGCTATTTTTTCT
CTTCATTTAGCTGGGGCGTCTTCTATCATGGGTTCTATTAATTTTATTTCTACTATTTTTAATATACGAACAGTGGGGAT
AAGTATAGAAAAGGTACCTTTGTTTGTTTGGTCTGTTTTGGTGACAACAATTTTATTATTAGTGTCTTTACCAGTGTTGG
CGGGGGCAATTACTATATTATTAACTGATCGTAATTTTAATACATCGTTTTTTGATCCGGCTGGAGGAGGAGATCCTATT
TTATTTCAACACTTGTTT
>CNGLF2730-13|Mesostigmata|COI-5P
AACATTATATTTAATTTTTGCTGCTTGATCTGCTATAGTAGGAACCTCTTTAAGAATAATTATTCGTTTAGAACTAGGCC
AACCAGGATCTTTAATTGGAGATGACCAAATTTACAACACTATTGTAACCGCTCATGCTTTTATTATAATTTTTTTTATA
GTTATACCTGCTATAGTGGGAGGATTTGGGAATTGAATAACACCTTTAATAATCTCTGCCCCTGACATAGCTTTCCCTCG
TTTAAATAATATAAGATTCTGATTGTTACCCCCCAGTCTATTTTTATTACTAAGTAGATCATTAATTGAAATAGGAGCTG
GAACAGGATGAACAGTTTATCCCCCTTTAGCCGGTAATATCAGACATAGAGGGGGAGCCGTTGACTTAGCTATTTTTAGC
CTTCATCTAGCAGGAGCTAGAAGAATTCTAGGATCAATTAATTTTTTAACAACAATTTTAAATATGCGACCAAAAGACAT
AAAAGCAGAACAAACTTCTTTATTTGTCTGATCTATTTTTTTAACAACAGTATTACTCCTTTTAAGTTTACCTGTGTTAG
CGGGAGCTATTACTATATTATTAACCGATCGTAATTTTAATACTTCTTTTTTT
>CENAM162-12|Araneae|COI-5P
AACATTATATTTAATTTTTGGGGCTTGATCTGCTATAGTAGGAACTGCTATAAGAGTATTAATTCGAATTGAATTGGGGC
AACCTGGAAGATTTATAGGAGATGATCAGTTATATAATGTAATTGTTACGGCTCATGCTTTTGTAATAATTTTTTTTATA
GTAATGCCTATTTTAATTGGGGGTTTTGGAAATTGATTGGTTCCATTAATATTAGGTGCTCCTGATATGGCTTTTCCTCG
AATAAATAATTTAAGATTTTGATTATTACCTCCTTCATTATTTCTTTTAATTATCTCTTCTATAGTAGAAATAGGTGTAG
GGGCAGGATGAACAGTTTATCCTCCTTTAGCTGGATTGGAGGGACATGCTGGGAGATCTGTAGATTTTGCTATTTTCTCT
TTACATTTAGCGGGTGCTTCTTCAATTATAGGTGCTATTAATTTTATTTCTACTATTATTAATATACGATTTTACGGAAT
AACTATAGAAAAAGTTCCTTTATTTGTTTGATCAGTATTGATTACTGCTGTATTATTATTACTTTCTTTACCTGTATTAG
CAGGTGCTATTACTATATTATTAACAGATCGTAATTTTAATACATCTTTTTTTGATCCTTCAGGAGGAGGGGATCCAATT
TTATTTCAACATCTGTTT
>SPRMA755-10|Araneae|COI-5P|JF887169
AACTTTGTATTTAGTATTTGGGGCTTGAGCAGCTATAGTAGGAACTGCAATAAGAGTATTAATTCGTATTGAATTAGGTC
AACCTGGTAGATTTCTAGGAGATGATCAATTGTATAATGTGATTGTTACGGCTCATGCTTTTGTAATAATTTTTTTTATA
GTAATACCTATTTTAATTGGTGGATTTGGAAATTGATTGGTTCCTTTAATATTAGGAGCTCCTGATATAGCATTTCCTCG
AATAAATAATTTAAGATTCTGGTTATTACCCCCCTCATTGTTTTTATTATTTATCTCTTCTATAGTAGAGATAGGGGTAG
GTGCGGGTTGAACTGTTTATCCCCCCCTATCATCTTTGGATGGTCATGGAGGAAGATCAGTAGATTTTGCTATTTTTTCT
CTTCATTTAGCAGGGGCTTCATCTATTATAGGAGCAGTAAATTTTATTTCTACTATTTTAAACATGCGTTCTTATGGGAT
AACTATAGAAAAAGTTCCTTTATTTGTTTGGTCAGTGTTAATTACAGCTGTTTTATTATTATTATCTTTACCAGTGTTAG
CTGGTGCTATTACTATATTGTTAACTGATCGAAATTTTAATACATCATTCTTTGATCCTGCTGGTGGTGGAGACCCTATC
TTATTTCAACATTTGTTT
>SSPAB9379-13|Sarcoptiformes|COI-5P
AACTCTTTACTTTATTTTTGGAGCTTGAGCTGGGCTACTCGGATCCGCTCTGAGGGCCTTAATCCGGTTGGAGTTGGGGC
AACCTGGATCCTTGCTAGAAAATGATCAAATCTATAATACTATCGTAACAGCACATGCTTTCGTAATAATCTTTTTCATG
GTTATGCCAATCCTAATCGGGGGATTTGGGAACTGACTTGTCCCAATAATAATCGGTGCTCAAGATATGGCCTTTCCTCG
TATGAATAATATAAGATTTTGACTTCTCCCTCCATCTCTAACCTTACTAGCTGTCTCGGCATTTGCTGGTGCAGGAGCTG
GCACTGGTTGGACCGTTTACCCACCCCTGGCAGGGAATCTATTTCACTCAAGTATCTCTGTAGATTTGGCAATTTTTAGA
TTACACCTAGCAGGTGCCTCCTCCATTTTAGGAGCTATCAACTTCATCACAACCATCATAAATATGCGTTCTTCTTCAAT
AACATTAGACTCAATCCCCCTGTTTGTATGATCCGTGCTAATTACCGCTGTCTTACTGTTACTCTCGCTTCCTGTTCTTG
CAGGGGCCATCACCATGCTACTAACAGAC
>TURAR1022-10|Araneae|COI-5P|HQ982537
GACTTTGTATTTAGTTTTTGGAGCTTGATCTGCTATAGTTGGAACAGCAATAAGAGTGTTGATTCGAGGAGAATTAGGTC
AACCTGGTAGATTGATTGGAGATGATCAATTATATAATGTAGTTGTTACTGCTCATGCTTTTGTTATAATTTTTTTTATA
GTAATACCAATTTTAATTGGTGGTTTTGGAAATTGATTAGTCCCTTTAATATTAGGTGCTCCTGATATAGCATTTCCTCG
TATAAATAATTTAAGATTTTGACTTTTACCTCCTTCTTTAATATTACTGTTTATTTCTTCTATGGTTGAAATAGGAGTTG
GAGCTGGTTGAACTGTATATCCCCCTTTAGCTTCTTTAATAGGTCATATAGGATCTTCTGTTGATTTTGCTATTTTTTCT
CTTCATTTAGCTGGAGCTTCTTCTATTATAGGGGCTGTTAATTTTATTTCAACTATTATTAATATACGGTCTCCAGGAAT
ATCTTTTGAAAAAGTTCCTTTATTTGTATGATCAGTTTTAATTACAGCTGTATTATTGTTATTATCATTACCTGTATTAG
CAGGTGCTATTACTATATTATTAACTGATCGAAATTTTAATACTTCTTTTTTTGATCCTGCAGGAGGTGGGGATCCTATT
TTATTTCAACATTTATTT
>CHACA416-09|Mesostigmata|COI-5P
AACTTTATACTTCATTTTCGGTGCTTGAGCTGGGCTAATAGGATCAGCTTTAAGAGGACTAATCCGGATAGAGCTGGGAC
AGCCAGGGTCACTAATAGAAAATGATCAAATCTACAACACAATTGTTACCGCCCATGCTTTTGTAATAATTTTCTTTATA
GTTATACCTATCATAATCGGGGGGTTCGGAAATTGATTGGTGCCCATAATGATTGGGGCGCAAGACATAGCCTTTCCACG
AATAAACAATATAAGATTTTGACTTCTCCCCCCATCCCTGGCTCTCCTTTCTTCTTCAGCTTTTGCAGGGATAGGGGCAG
GAACAGGGTGGACGGTCTATCCTCCTTTAGCAAGAAATTTATTTCACTCAGGATTTTCTGTTGACTTGGCAATTTTTAGC
TTACACTTAGCTGGGGCGTCTTCTATCCTAGGAGCCATTAATTTTATTACTACAATTTTGAATATACGTTCTTCCTCAGT
TTCATTAGACAGGATCCCTTTGTTTGTTTGATCGGTATTAATTACAGCTATTTTGTTACTACTTTCTCTGCCTGTTCTTG
CAGGAGCCATTACCATATTACTTACAGACCGTAATTTCAATACCTCATTTTTTGACCCCTCGGGTGGCGGGGATCCTATC
TTATACCAACATTTGTTT
>SSJAA783-13|Trombidiformes|COI-5P
GACACTTTACTTCGCTTTTGGGGCCTGATCCGGAATAGTAGGGGCCAGTTTAAGTACTTTAATCCGTTTAGAATTAGGAC
AACCAGGATCTTTAATCGGAAATGAGCAAGTTTATAACACAATTGTAACAGCCCACGCATTTGTTATAATCTTCTTTATA
GTAATACCTATAATAATTGGGGGATTTGGTAATTGATTAGTACCCTTGATAATTAGAGCACCAGATATAGCCTTTCCACG
AATAAATAATATAAGATTTTGATTACTACCACCATCATTAATTTTACTGCTCACTAGATCATTCACTTCTATAGGTGCTG
GAACAGGATGAACAGTATACCCCCCCTTATCAGGAAATTTAGCTCATGCTGGTCCTTCAGTAGACTTAACTATTTTCTCT
CTACATTTAGCGGGTATTTCTTCAATCTTAGGAGCAATTAATTTTATGGCTACTATTATCAATATAAAACCAAAATCTAT
AAAAATAGAACAAATTCCATTGTTTGTTTGATCCATTTTTATTACAACTATTCTACTATTATTATCCCTTCCAGTATTAG
CTGGGGCTATCACAATACTTTTAACAGACCGAAACTTTAACACATCATTTTTTGACCCTGCAGGGGGGGGAGA
>CNJAB1038-12|Mesostigmata|COI-5P
TACATTATATTTTATATTTGCTATTTGATCTGCAATAGTAGGGTCTTCTATAAGTTTATTTATTCGTATTGAACTTTCTC
AACCCGGTACTTTTATTGGAGATGACTCTATTTATAATGTAATTGTGACATCACATGCTTTTGTCATAATTTTTTTCATA
GTCATGCCAGCAATAATTGGGGGCTTTGGAAATTGATTAATTCCTTTAATAATTAGAGCCCCTGATATAGCTTTCCCACG
AATAAACAACATAAGATTTTGACTTTTACCCCCTTCTCTAATTTTACTTATTTTATCAAGAATAGTAGAAAGAGGGGCTG
GCACAGGTTGAACAGTTTACCCCCCTTTATCAGGAAATATTGCTCATAGAGGTAGATCTGTAGACCTAGCTATTTTTAGA
CTACATTTAGCAGGAATTTCTTCAATTTTAGGGGCTATTAATTTTATTTCTACAATTTTAAATATACGAGCAAAAAGAAT
AAATTTAGAACAAATGCCTCTATTTGTCTGGTCCGTTTTTATTACAGCAATTTTACTTCTACTTAGTTTACCTGTTCTTG
CAGGAGCCATTACAATATTATTAACCGATCGAAATTTTAATACAACTTTTTTTGACCCTAGAGGAGGAGGTGA
>MYMCA331-11|Oppiidae|COI-5P|JX834870
TACTCTATACTTCATCTTTGGGGCTTGGGCAGGATTGCTTGGTTCGGCTCTCAGAGCCCTAATTCGTTTAGAACTAGGAC
AGCCTGGGTCGCTTATAGAAAACGATCAAATTTATAACACTATTGTAACAGCACATGCTTTTGTTATGATTTTTTTCATG
GTCATGCCAATTTTAATTGGAGGATTCGGGAACTGACTTGTTCCAATAATAATCGGAGCTCAAGACATGGCTTTCCCACG
AATAAACAACATGAGATTTTGGCTTTTACCACCTTCCCTATCCCTACTATCAATTTCTGCGTTTGCTGGAGCTGGAGCAG
GAACCGGTTGAACTGTTTACCCACCTTTGGCAGGAAATCTGTTTCACTCTGGAATTTCAGTGGACCTGGCAATTTTCAGT
TTACATTTGGCTGGTGCATCCTCGATTCTGGGAGCCATTAACTTTATCACCACAATCATAAACATACGATCCTCCTCAAT
GTCTTTGGATTCAATTCCCTTATTTGTTTGATCTGTACTTATTACAGCAGTTTTACTTCTGCTATCCCTTCCGGTGTTAG
CTGGAGCTATCACAATATTATTAACAGACCGTAATTTTAACACATCTTTTTTTGACCCTTCAGGGGGAGGAGATCCAATT
TTGTACCAACACTTGTTC
>BCPB202-10|Mesostigmata|COI-5P
AACTCTTTATCTTATTTTCTCTATATGATCTGGAATATTAGGATCTGCTTTAAGAATAATTATTCGAATAGAATTAGGAC
AACCTGGACCTTTAATTAACGATGATCAAATTTATAACACTATTGTTACAGCTCATGCATTTATTATAATTTTTTTTATA
GTTATACCTGCTTTAATTGGAGGTTTTGGAAATTGATTAGTTCCTATTATAATCTCTGCACCAGATATAGCTTTCCCACG
AATAAATAATATAAGATTTTGACTATTACCCCCTTCTTTAATTTTATTATTAAGATCTTCTATAATTGAATCAGGAGTAG
GAACAGGTTGAACTGTTTATCCTCCATTATCAAATAACATTTCTCATAGAGGTTGTGCAGTTGATTTAGCAATTTTTAGA
CTTCATATAGCTGGAATCTCATCAATTTTAGGATCAATTAACTTTATTTGTACAATTTTAAATATACGACCAAAAGAAAT
AAATTTAGAACAAATACCATTATTTGTATGATCAGTTTTTATTACTACTATTCTTCTATTATTATCATTACCTGTATTAG
CAGGAGCCATTACTATACTATTAACAGATCGAAACTTTAACACTAGATTCTTTGATCCAAGAGGAGGGGGAGACCCTATC
TTATATCAACACTTATTT
>MYMCC652-11|Tydeidae|COI-5P|JX836412
AACAATATACTTTATTTTCGGAATATGATCAGGAATTATAGGAGCTTCTATAAGAGTAATTATTCGAATAAAACTATCCC
ACACCTCCTTATTTTCCCAAAATGATCAAATATATAATGTTTTAGTAACATCACACGCTTTTGTAATAATTTTTTTTATG
GTTATACCTATTATAATTGGAGGATTTGGAAACTGGATAGTTCCTATTTTTTTAGGCTCTCCCGACATGGCTTTCCCTCG
TATAAACAATATGAGTTTTTGGCTTCTTCCTCCCTCTTTATCTTTATTAATGCTTTCATCTATGGTAGATACTGGAGCAG
GAACAGGATGAACTGTTTACCCCCCACTTTCCTCTCAATTATTTCATATAAATGGTTCAGTAGACCTAACAATTTTCTCT
TTACATTTAGCAGGAGTATCATCTATTTTAGGGGCAGTAAATTTTATTACAACCATTTTAAACATACGATCGAAAATAAT
AAAATTCGAACGAATCCCATTATTTATTTGATCAATTTTTATTACTACAATTTTATTGCTTCTTTCTTTACCAGTTTTAG
CTGGAGCTATTACAATATTGTTAACGGACCGAAACTTTAATACAACCTTCTTCGATCCTGCAGGTGGAGGAGACCCAATT
TTATATCAACATTTATTT
>CNJAF1943-12|Mesostigmata|COI-5P
AACATTATATTTTTTATTTGCTAGATGAGCCGCTATAGTAGGATCTTCTATAAGACTATTTATTCGAATTGAACTCTCTC
AACCGGGAACTTTTATTGGAGATGACTCAATTTATAATGTAATTGTTACTTCACATGCTTTTGTAATAATTTTCTTTATA
GTAATACCTGCTATAATTGGAGGATTTGGGAACTGACTAGTACCATTAATAATTAGGGCCCCAGATATAGCATTTCCTCG
AATAAACAATATAAGATTTTGGCTTTTACCCCCTTCCCTAACCTTATTAATATTATCAAGAATAGTAGACGGAGGAGCAG
GCACAGGATGAACAGTGTACCCTCCTTTAGCTAGTAATATTGCTCACAGAGGGAGCTCTGTTGATTTGGCAATTTTCAGA
CTTCATTTAGCTGGGATCTCTTCAATTTTAGGAGCAATTAATTTTATTTCAACTATTTTAAATATACGAGCAAAAAATAT
AAAAATAGAACAAATACCTTTATTTGTATGATCTGTATTTATTACTGCCATCCTTTTACTATTGAGCTTACCTGTTTTAG
CAGGAGCTATTACTATACTATTAACAGACCGAAACTTTAACACAACTTTTTTTGATCCTAGAGGAGGAGGAGAC
>SPIRU1348-11|Sisisrotundus|COI-5P|KF368782
AAGTTTATATTTTGTTTTTGGGGCTTGGGCTGCTATAGTAGGAACAGCAATGAGAGTATTGATTCGAATTGAGTTAGGGC
AAATTGGTAGCTTGTTGGGGGATGATCAATTATATAATGTTATTGTTACGGCTCATGCTTTTGTTATAATTTTTTTTATA
GTGATACCTATTTTAATCGGGGGTTTTGGTAATTGGTTGGTACCTTTGATGTTAGGGGCTCCTGATATGGCTTTTCCTCG
CATAAATAATTTAAGATTTTGATTATTACCACCTTCATTATTATTATTATTTATTTCTAGAATGGATGAGATAGGAGTAG
GAGCAGGATGAACTGTCTATCCCCCTCTTGCTTCTTTGGAGGGGCATTCTGGGAGATCAGTAGATTTTGCTATTTTTTCT
TTACATTTGGCTGGGGCATCTTCAATTATAGGAGCTATTAATTTTATTTCTACTATTTTAAATATACGAGGATATGGGAT
AACCATGGAAAAGGTCCCTTTATTTGTGTGATCTGTTTTAATTACAGCTGTATTATTATTGTTATCTTTGCCTGTGTTAG
CAGGAGCTATTACCATGCTTTTGACAGATCGGAATTTTAATACATCATTTTTTGACCCATCGGGGGGAGGAGATCCGGTC
TTGTTTCAACACTTATTT
>CNGIB572-12|Mesostigmata|COI-5P
TACAATATATTTTATTTTTGCTTTATGAAGTAGAATATTAGGAAGTGCAATAAGAATAATTATTCGACTTGAATTAAGCC
AACCTAAATCATTATTATTTAATGATCAAATTTATAATGTAGTAGTAACTTCACATGCTTTTATTATAATTTTTTTTATA
GTCATACCTGCTATAATTGGTGGTTTTGGAAATTGATTAGTACCCCTAATGATTAATGCCCCAGACATAGCATTTCCTCG
AATAAATAATATAAGACTATGATTATTGATACCTTCTTTATTGTTTTTAATAATTTCAGCAAATGTTGAAATAGGAGCAG
GTACTGGGTGAACAGTGTATCCTCCTTTATCTAATTCTATTTTTCATAGAAGAGTGTCTGTAGATTTAGCTATTTTTAGT
TTACACTTAGCTGGGGCTTCTTCTATTATAGGTGCAATTAATTTTATTAGCACAGTGATTAATATGCGATCTACATATTT
AAATATTGAAATATTGTCTTTATTTGTTTGATCGGTGATAATTACTGCAATATTATTATTATTATCACTTCCTGTTTTAG
CAGGAAGTATTACAATATTATTGACTGATCGTAATTTTAATACTAGATTTTTTGATCCTTGTGGGGGTGGAG
>MYMCC807-11|Opiella|COI-5P|JX834010
AACTTTATACTTTATTTTTGGTGCTTGAGCAGGATTGCTAGGATCAGCATTGAGAGCCCTGATTCGACTAGAACTAGGGC
AACCTGGTTCCCTGATGGAAAACGATCAAATCTACAACACCATCGTGACAGCACATGCTTTTGTTATAATCTTCTTTATA
GTTATGCCAATTTTGATTGGAGGGTTTGGTAACTGACTTGTACCTATAATGATTGGAGCTCAAGACATAGCCTTCCCACG
TATAAATAACATAAGATTTTGATTGTTACCACCATCTCTTTCTCTATTGTCTATTTCTGCTTTTGCTGGTGCTGGTGCCG
GTACTGGTTGAACGGTTTACCCACCTTTAGCTGGTAACCTATTCCATTCTGGAATCTCAGTTGACTTAGCAATTTTTAGA
CTCCATTTGGCTGGAGCATCTTCCATCTTGGGAGCGATTAACTTCATTACCACAATCATGAATATGCGATCAGCCTCCAT
ATCCTTAGACTCTATCCCTCTATTTGTTTGATCTGTCCTTATTACAGCAGTGCTTCTTCTTCTATCCCTCCCGGTATTAG
CAGGAGCTATCACAATGTTACTGACAGACCGTAATTTCAACACGTCCTTTTTTGATCCTTCCGGTGGAGGGGACCCAATT
TTGTACCAACATCTATTT
>CHACB1037-10|Zerconidae|COI-5P|HM907170
AACTTTATACCTAATTTTTAGTATATGAACAAGTATATTAGGAATATCTATAAGAATTATTATCCGAATTGAATTAGGTC
AGCCAGGATCTTTAATTAATAATGATCAAATTTATAATGTCTTAGTAACAGCTCATGCTTTTATTATAATTTTTTTTATA
GTTATACCTATTATAATCGGAGGATTCGGTAACTGACTTATTCCTTTAATAGTAATAACTCCAGATATAGCTTTTCCTCG
CTTAAACAACATAAGATTTTGACTATTACCCCCCTCTTTAGTTTTTTTATTAAGTTCTTCATTAATTGAATCTGGAGCTG
GAACCGGATGAACTGTCTACCCACCTCTTTCTAATAATATTTCTCATAGGGGCATAAGTGTAGACTTAACTATTTTTTCT
TTACACTTAGCCGGAATCTCTTCAATTTTAGGAGCCATTAATTTTATTGTAACAATTTTAAATATACGACCTCCACACAT
ATCTATAGAAAAATTACCATTATTTATCTGAGCAATTTTTATTACAACTATTTTACTTCTTTTAGCTTTGCCTGTCTTAG
CAGGAGCTATCACCATACTTTTAACCGATCGAAATTTTAATACTTCATTTTTTGACCCTAACGGGGGAGGAGACCCTATT
TTATATCAACATTTATTT
>BBUSE106-11|Araneae|COI-5P
AACTTTATATTTAATTTTTGGTGCTTGGGCTGCAATAGTAGGAACTGCAATAAGAGTATTGATTCGAATTGAATTGGGGC
AACCTGGAAGATTTATTGGGGATGATCAGCTTTACAATGTAATTGTAACGGCTCATGCGTTTGTAATAATTTTTTTTATA
GTAATGCCAATTTTAATCGGTGGTTTTGGAAATTGGTTAGTTCCTTTAATATTAGGGGCTCCTGATATGGCTTTTCCTCG
AATAAATAATTTAAGATTTTGATTGCTTCCACCTTCTTTATTTCTTTTAGTAATTTCTTCAATAGTAGAAATAGGAGTGG
GGGCTGGGTGAACTGTATACCCTCCTTTAGCTAGTTTAGAAGGCCATGCTGGGAGTTCAGTGGATTTTGCAATTTTTTCT
TTACATTTGGCTGGGGCTTCTTCAATTATAGGAGCAATTAATTTTATTTCAACTATTATTAATATACGGTTTTATGGAAT
AACTATAGATAAAATTCCTTTGTTTGTATGGTCTGTATTGATTACTGCTGTATTGTTATTACTATCATTACCAGTATTAG
CTGGTGCAATTACAATATTATTAACGGATCGAAATTTTAATACTTCATTTTTTGACCCTTCTGGCGGGGGGGACCCTATC
TTATTTCAGCATTTGTTT
>MIONB469-11|Trombidiformes|COI-5P
AACTTTATACTTCCTTCTAGGAGCATGAGCCGGAATTTTAGGACTTAGACTAAGAGCTGTAATTCGAATAGAATTAAACC
AACCAGGCCAATTATTCTCCAGAGACCAAACTTACAATTCAATTGTCACTTCCCATGCTTTCGTTATAATTTTTTTTATG
GTAATACCAATCATAATTGGAGGATTCGGGAACTGACTTGTACCCATAATAATCGGAGCTCCAGATATAGCTTTTCCACG
AATAAACAACATAAGATTTTGATTACTACCGCCAGCTTTATCTTTACTTTTGATGGCCTCCTTTTCTACTATAGGGGTTG
GGACAGGGTGAACAGTGTATCCTCCATTATCATCCAACTTAGCGCATAGCTCTATATCAATCGAAATGACAATTTTTTCA
TTACACTTAGCAGGTGTTTCATCAATTCTAGGAGCTATTAACTTTTTAGCTACTATCAGAAACATAAAAAGAAAAAACCT
ATCAGCAGAAAAAACTCCACTGTTTGTAGTAGCGGTAGCGGTTACCGCTATTCTGCTTCTCCTTTCTTTACCAGTTTTAG
CAGGAGCTATCACAATACTTTTAACTGATCGAAATTTTAACACAACATTTTTTGACCCTTCAGGGGGAGGAGACCCAATT
CTATACCAACACTTATTC
>SSBAB1207-12|Trombidiformes|COI-5P
AACTATATATTTTGCTTTTGGCCTATGGTCAGCTCTGCTTGGAGCTTCAATAAGTATCCTAATCCGAATAGAACTAGGGC
AACCAGGATCAATAATACAAAATGATCAAATTTATAATACTATCGTAACAGCCCACGCTTTTGTTATAATTTTTTTTATA
GTCATACCAATTATAATCGGAGGATTCGGAAATTGATTAGTTCCCATAATAATTGGAGCCCCAGATATAGCATTTCCACG
AATAAACAATATAAGCTTTTGACTACTTCCGCCATCACTTTCATTACTTTTAATATCATCTTTCACAAGAGCAGGAGTAG
GAACCGGATGAACTGTTTACCCCCCACTGTCAAGAAATATAGCACACCCAGGAGGAGCCGTAGATTTAGGAATTTTCTCC
CTACACTTAGCAGGAATTTCATCAATCTTGGGAGCTATTAACTTCATAACAACAATTGTAAATATACGCTCTCCATCCAT
ATCATTTGAACGAGTCCCACTATTTGTTTGATCAGTTTTTATTACAGCTCTACTACTATTACTATCGCTTCCAGTTTTAG
CAGGAGCCATTACAATATTATTAACAGATCGAAATTTTAATACATCTTTCTTTGACCCTGCTGGAGGAGGAGACCC
>SPICR278-11|Araneae|COI-5P|JN310081
AAGTTTATATTTTTTATTTGGGGTTTGATCTGCTATAGTAGGGACTGCTATAAGAGTTTTAATTCGAATTGAATTAGGTC
AATCTGGAAGATTTTTAGGAGATGATCAGTTATACAATGTTATTGTTACTGCTCATGCATTTGTTATAATTTTTTTTATA
GTGATACCAATTTTAATTGGTGGATTCGGTAATTGGTTGGTTCCTTTAATGTTAGGAGCTCCAGATATGGCTTTTCCTCG
GATAAATAATTTAAGTTTTTGACTTCTTCCCCCCTCTCTTTTTATATTATTTATTTCTTCTATAGTAGATATAGGGGTTG
GGGCAGGATGAACTGTTTATCCTCCTTTAGCTTCTTTAGAAGGACACCCAGGTAGATCTGTTGATTTTGCTATTTTTTCT
CTTCATTTAGCTGGTGCTTCTTCTATTATAGGGGCTATTAATTTTATTTCCACTATTATTAATATACGAATAAGAGGAAT
TTCTATAGAAAAGGTCCCACTTTTTGTGTGATCTGTCCTAATTACTGCTGTTTTATTACTATTATCTTTACCTGTTTTAG
CAGGTGCTATCACAATATTGTTAACGGATCGAAATTTTAATACTTCTTTTTTTGATCCTTCTGGAGGAGGGGATCCAGTG
TTGTTTCAACATTTATTT
>CNBPL269-13|Sarcoptiformes|COI-5P
AACCCTATATTTTCTTTTTGGAGCTTGAGCCGGACTAATGGGCTCTGCCCTTAGAGCCATTATTCGATTGGAACTAGCTC
AACCTGGCTCCTTCCTTGAAAATGATCAAATTTACAACACAATTGTTACCGCTCACGCTTTTGTCATAATCTTCTTCATA
GTGATACCCGTAATGATTGGGGGATTTGGAAATTGACTGATCCCTCTCATGGTAGGGGCACAAGACATGGCATTTCCACG
AATAAATAACATAAGATTCTGGCTTTTACCTCCCTCCCTAACTCTTCTATCTATATCAGCCTTTGCGGGAACTGGGGCCG
GTACCGGTTGAACCGTTTACCCTCCTTTAGCCGGGAATCTTTTCCACTCAGGAATTTCAGTTGATTTAGCAATTTTCAGT
CTTCATTTAGCTGGTGCCTCCTCCATTCTAGGAGCAATCAACTTTATCTCTACCATTACGAACATACGCTCATCTTTCAT
GAACCTAGACATAATCCCTCTATTCGCATGATCTGTTTTGATCACGGCAGTGCTTCTACTTCTATCCCTTCCCGTTTTAG
CAGGAGCTATCACAATACTTCTCACAGACCGAAATTTTAATACTTCATTCTTCGAGCCCTCTGGCGGGGGCG
>SPIPA506-10|Araneae|COI-5P|HQ975952
TACTTTGTATTTTATTTTTGGGGCTTGAGCTTCTATAGTAGGAACCGCCATAAGAGTATTAATTCGAGTTGAATTGGGTC
AATCTGGGAGATTATTGGGGGATGATCAGCTATATAATGTGATTGTAACGGCTCATGCTTTTATTATAATTTTTTTTATG
GTGATACCGATTTTAATTGGGGGGTTTGGAAATTGGTTAGTTCCTTTAATGTTAGGGGCTCCTGATATAGCTTTTCCTCG
GATGAATAATTTAAGATTTTGGTTGTTGCCCCCTTCCTTTTTTTTGCTTTTAGTTTCGTCAATAGTTGATATAGGGGTAG
GGGCGGGGTGGACTGTTTATCCTCCCCTTTCTTCATTAGAGGGGCATTCTGGTAGATCTATAGATTTTGCTATTTTTTCT
CTTCATTTGGCCGGGGCCTCGTCTATTATGGGGGCTATCAATTTTATTTCTACAGTAATAAATATGCGGTTTGGTGGTAT
AACCATGGAAAAAGTTCCACTTTTTGTGTGATCTGTGTTTGTCACAGCGATTCTTTTATTATTGTCTTTGCCAGTATTGG
CAGGGGCAATTACTATGTTATTAACAGATCGAAATTTTAATACTTCTTTTTTTGACCCCTCTGGGGGAGGGGATCCTGTT
TTGTTTCAACATTTATTT
>NLARA166-12|Coelotesterrestris|COI-5P
AACTTTGTATTTAATTTTTGGGGCTTGGTCTGCTATAGTTGGAACGGCTATAAGAGTATTGATTCGAATTGAATTAGGTC
AATCAGGGAGTTTTTTAGGTGATGATCATATATATAATGTTATTGTTACTGCTCATGCTTTTGTTATAATTTTTTTTATA
GTAATGCCTATTTTAATTGGAGGTTTTGGTAATTGATTAGTGCCTTTAATATTAGGTGCTCCAGATATAGCTTTTCCTCG
ATTAAATAATTTAAGATTTTGATTATTACCTCCTTCATTATTTTTGTTATTTATTTCTTCTATAGTTGAAATAGGTGTAG
GGGCTGGATGAACGGTTTATCCGCCATTAGCTTCTAGTATAGGTCATGCTGGAAGATCTGTTGATTTTGCTATTTTTTCT
TTACATTTAGCTGGGGCTTCTTCTATTTTAGGAGCGATTAATTTTATTTCTACTATTTTTAATATACGATCATATGGAAT
GACTTTTGAAAAGGTTCCTTTATTTGTTTGGTCTGTGTTGATTACTGTTGTATTATTATTATTATCTTTACCTGTATTGG
CTGGTGCTATTACAATATTGTTAACTGATCGAAATTTTAATACTTCATTTTTTGATCCAGCTGGAGGTGGAGATCCTATT
TTATTTCAACATTTATTT
>CNEIC3175-12|Araneae|COI-5P
GAGTTTATATTTTATTTTTGGAGCATGGGCTGCTATAGTAGGAACAGCAATAAGAGTTTTAATTCGTATTGAGTTAGGTC
AAACTGGAAGATTATTGGGGGATGACCAGTTATATAATGTTATTGTTACAGCTCATGCTTTTGTTATAATTTTTTTTATA
GTGATACCTATTTTGATTGGGGGATTTGGAAATTGATTAGTACCGTTGATGTTAGGGGCACCAGATATAGCTTTTCCACG
TATAAATAATTTAAGATTTTGACTTTTACCCCCTTCTTTATTTTTGTTGTTTATTTCAAGAATAGATGAAATAGGGGTAG
GGGCTGGATGGACAGTTTATCCTCCACTTGCTTCTTTAGAAGGGCATTCTGGCAGATCAGTAGATTTTGCTATTTTTTCT
TTACATTTAGCTGGAGCTTCGTCTATTATAGGGGCTATTAATTTTATTTCTACTATTATAAATATGCGAGGGCATGGGAT
AACTATAGAAAAAGTTCCTTTATTTGTATGATCTGTTCTTATTACAGCTGTTTTATTATTGTTATCTTTACCAGTGTTGG
CTGGTGCTATTACTATATTATTAACGGATCGAAATTTTAATACGTCATTTTTTGATCCATCGGGAGGGGGTGA
>SPRMA1114-12|Araneae|COI-5P
GAGTTTGTACTTTATTTTTGGAGCTTGAGCAGCTATAGTAGGAACAGCGATAAGAGTATTAATTCGAATTGAGTTAGGTC
AGACTGGAAGATTACTAGGTGATGACCAATTATATAATGTTATTGTAACAGCTCACGCTTTTGTAATAATTTTCTTTATA
GTAATACCTATTTTAATTGGAGGATTTGGTAATTGGTTGGTTCCTTTAATGTTAGGGGCGCCTGATATAGCATTTCCTCG
AATGAATAATTTAAGATTTTGGTTATTACCCCCATCTTTATTTTTATTATTTATTTCTAGAATGGATGAAATAGGAGTAG
GTGCAGGTTGAACTGTATACCCTCCTCTTGCTTCTTTAGAAGGGCATGCGGGAAGTTCTGTGGATTTTGCTATTTTTTCT
TTGCATTTAGCTGGGGCTTCTTCAATTATAGGAGCTATTAATTTTATTTCTACAATTTTAAATATACGGGGTTATGGTAT
AACTATAGAAAAGGTTCCTTTATTTGTTTGGTCTGTTTTGATTACTGCTGTCTTATTATTATTGTCTTTACCTGTTTTAG
CAGGGGCTATTACTATATTATTAACCGATCGAAATTTTAATACATCATTTTTTGATCCGTCCGGAGGAGGGGATCCTGTG
TTGTTTCAACATTTATTT
>ETKS563-13|Araneae|COI-5P
GACTTTATATTTAGTATTTGGGTCTTGATCAGCGATAGTTGGAACGGCTATGAGAGTTTTAATTCGTATGGAATTGGGTC
AATCTGGAAGATTGATAGGTGATGATCATCTTTATAATGTAATTGTTACGGCTCATGCTTTTATTATGATTTTTTTTATG
GTAATACCTATAATAATTGGGGGTTTTGGAAATTGATTGGTTCCTTTAATGTTAGGTGCTCCTGATATAGCTTTTCCTCG
AATAAATAACTTAAGTTTTTGATTGTTACCTCCTTCTCTAATTTTATTATTTATTTCATCAATAGTTGAGATAGGGGTGG
GAGCTGGTTGAACTGTATATCCTCCTCTTGCATCGGGTTTTGGTCATCCTGGGAGAGCAATGGATTTTGCTATTTTTTCT
TTACATTTAGCTGGTGCTTCTTCTATTATAGGTGCTATTAATTTTATTTCTACTATTATTAACATACGTTCTTATGGAAT
AAGAATGGAAAAGGTTTCTTTATTTGTATGATCAGTTTTTATTACTGCTATTTTATTATTATTATCATTACCTGTTTTAG
CAGGAGCAATTACTATATTATTGACGGATCGAAATTTTAATACATCTTTCTTTGACCCTGCAGGGGGAGGGGATCCAATT
TTATTTCAACATTTATTT
>SSWLF3634-13|Trombidiformes|COI-5P
GACACTATACTTCGCGTTAGGCACCTGGGCAGGTATAATAGGCACTAGACTATCAGCATTAATCCGATTGGAGTTAGGCC
AACCAGGTCCCCTTTCAGGAGATGACCAAATTTACAACACTATTGTTACAGCGCACGCTTTCATTATGATCTTCTTTATA
GTAATACCAATAATAATCGGGGGGTTCGGCAACTGATTAGTCCCATTAATAATTGGAGCTCCTGATATAGCTTTCCCCCG
GATAAATAACATAAGATTCTGACTTTTACCCCCTTCTCTATCTCTACTAACTCTATCCTCATTCGTAGCAATAGGAGCAG
GAACAGGATGAACAGTGTACCCACCCTTGTCAAGAAATATGTCTCACGCGGGACCTTCAGTGGACCTAGCAATTTTCTCG
TTACATCTAGCTGGGATCTCTTCTATCTTAGGGTCTATTAATTTTATAGTGACAATCATAAACCTAAAGATCACACACCT
AAAATTCGAACAGATCCCCCTATTTGTATGATCTATTTTCATCACAACGATCCTACTGCTCTTATCATTACCCGTATTAG
CCGGAGCAATCACCATACTCCTAACAGATCGCAATTTTAATACATCGTTTTTTGACCCGGCTGGGGGTGGAG
>SFWIB008-13|Mesostigmata|COI-5P
TTCTTTGTATTTATTGTTTAGTTTATGGGCAAGGGGGTTAGGAAGTGCTTTAAGGATATTGATTCGGATTGAGCTTGGAC
AGCCAGGAGCTTTTATTAATGATGATCAAATCTATAACACTATTGTTACTTCTCATGCATTTGTTATAATTTTTTTTATA
GTTATGCCCGCCATAATTGGCGGATTTGGAAATTGGTTAACTCCTTTAATATTGGCAGCACCTGATATAGCTTTTCCTCG
TTTAAATAATATAAGATTTTGATTATTAATTCCTTCTTTAATTATATTAATTTTTTCTTCTTTTGTTGAGAGAGGAGCAG
GTACTGGTTGAACGGTGTATCCTCCTTTAGCTAGAAATATTTCTCATAGTGGGGCTTCTGTTGATCTAGCTATTTTTAGG
TTACATTTGGCTGGGGCTTCTTCTATTTTAAGGTCTATTAATTTTATTACTACTATTTTAAATATACGTTCTTTTAGGAT
AAAAATAGAAATATTTTCTTTATTTATTTGGTCTGTGTTTATTACAACAATTTTATTATTATTGTCTTTGCCAGTTTTAG
CAGGGGCTATTACTATATTATTAATAGATCGAAATTTTAATACTTCTTTTTTTGACCCTAGAGGGGGAGGAGATCCTATT
TTGTATCAACATTTGTTT
>CNRMC1522-12|Sarcoptiformes|COI-5P
AACTCTATACTTCGTGTTTGGAGCTTGGGCAGGCCTGCTAGGATCAGCTTTAAGAGGGCTAATCCGTCTAGAACTGGGCC
AACCGGGTTCTTTAATAGAAAATGATCAAATCTATAACACTATTGTAACAGCCCATGCTTTTGTAATAATTTTTTTCATA
GTTATACCTGTTATAATCGGAGGGTTTGGAAATTGATTGGTTCCTATGATAATTGGAGCTCAAGACATGGCCTTCCCTCG
GATAAATAACATAAGATTTTGGCTTCTTCCCCCGTCCTTGACTTTGCTTTCTGCATCGGCTTTCGCTGGGATGGGAGTGG
GGACCGGATGGACGGTGTATCCCCCCCTAGCAGGAAACTTGTTCCATTCCGGGATTTCCGTAGATTTAGCAATTTTTAGC
TTGCATTTAGCCGGGGCTTCTTCAATTTTAGGAGCTATCAATTTTATCACCACTATTCTAAATATGCGGTCCTCTTCTTT
AACGTTAGATTCAATTCCTCTGTTTGTTTGATCAGTCTTAATTACTGCAGTTCTTCTGTTGCTATCTCTCCCAGTGCTAG
CGGGAGCTATCACTATACTACTTACAGACCGAAATTTTAATACCTCCTTTTTTG
>SSWLF3095-13|Arachnida|COI-5P
AACATTATATTTTCTTTTTGGTGCTTGAGCAGGGTTGCTAGGATCAGCCCTAAGAGGTTTAATTCGATTAGAGCTTGGAC
AACCAGGTTCATTAATAGAAAACGATCAAATTTACAACACAATTGTTACAGCTCATGCTTTTGTTATAATTTTTTTTATA
GTGATACCGGTTATAATCGGGGGATTCGGGAATTGGTTAGTTCCTATAATAATTGGAGCTCAAGATATGGCCTTTCCTCG
TATAAATAACATAAGATTTTGACTTTTACCTCCTTCTCTCGCACTTCTATCCTCTTCAGCATTCGCTGGTATAGGAGCAG
GCACAGGTTGAACTGTGTACCCCCCTTTAGCAAGAAACTTATTTCACTCAGGATTTTCTGTAGATTTAGCAATTTTTAGG
CTTCATTTAGCAGGAGCTTCTTCAATCTTAGGAGCTATTAATTTTATTACAACAATTTTAAATATACGTTCATCATCAAT
ATCTTTAGATTCAATTCCTCTATTTGTGTGATCCGTTTTAATTACCGCAGTTCTATTACTACTCTCACTTCCAGTTCTAG
CAGGAGCTATTACTATACTTTTAACAGATCGA
>BBUSS699-09|Araneae|COI-5P|HM429216
GACTTTATATTTTATTTTTGGTGCTTGGTCAGGTATATTAGGAATAGCTTTAAGAATATTAATTCGTTTAGAATTAGGAC
AATTGGGAAGAATCATTGGAGATGATCAGGTTTATAATGTTATCGTTACTGCTCATGCTTTAGTTATGATTTTTTTTATA
GTTATACCTATTTTGATTGGTGGATTTGGAAATTGGCTTGTTCCGTTAATATTAGGAGCACCCGATATGGCTTTTCCTCG
AATAAATAATTTAAGTTTTTGATTATTGCCATCTTCTTTAATGCTTTTATTATTTTCATCTATAGTAGAGTCAGGAGTAG
GAGCTGGATGAACAATTTATCCACCTTTGTCTGGGATGATGGCTCATTATGGTGTTTCTGTAGATATAGCTATTTTTTCT
CTTCATTTAGCTGGTGCTTCGTCAATTATAGGCGCTATTAATTTTATTACTACAATTATTAATATACGTAGAGATTTTAT
AAGAATAGATAAAGTTCCTTTATTTGTCTGGTCTGTATTAGTTACAGCTGTATTATTGTTGTTGTCTTTACCAGTTTTAG
CTGGAGCTATTACGATGTTATTGACTGATCGTAATTTTAATACTTCATTTTTTGATCCTGCTGGGGGAGGGGATCCTATT
TTGTTTCAACATTTATTT
>SPRMA1214-12|Araneae|COI-5P
GACGTTATATTTTATTTTTGGGGCTTGGGCGGCTATAGTAGGAACAGCAATAAGAGTATTAATTCGAATCGAGTTAGGAC
AGACTGGAAGATTATTGGGGGATGATCAATTGTACAATGTGATTGTTACAGCGCACGCTTTTGTTATAATTTTTTTTATA
GTTATGCCTATTTTAATTGGGGGGTTTGGAAATTGGTTGGTTCCATTAATGTTGGGGGCTCCTGATATAGCTTTTCCTCG
AATGAATAATTTAAGATTTTGGCTTTTGCCCCCTTCTTTATTTTTGTTATTTGTTTCTAGAATAGACGAGATAGGTGTAG
GGGCAGGATGAACAGTTTATCCCCCTCTTGCTTCTCTGGAGGGCCATTCGGGTAGATCAATAGATTTTGCTATTTTTTCC
TTGCATTTAGCAGGGGCATCTTCTATTATGGGAGCTATTAATTTTATTTCAACTATTTTAAATATACGAGGGTATGGAAT
AACTATAGAAAAGGTTCCTTTATTTGTATGGTCTGTATTAATCACTGCTATTTTATTACTCTTATCTCTTCCGGTTTTAG
CAGGGGCGATTACTATACTATTGACAGATCGTAATTTTAACACGTCTTTTTTTGACCCGTCGGGGGGAGGGGATCCTGTG
TTATTCCAGCATTTATTT
>GENHP1379-12|Arachnida|COI-5P
TAGACTTTATTTAATTTTTAGTATATGAACTAGTATACTTGGAATAGCTTTAAGATTAATTATTCGAATTGAATTGAGTA
CTCCTGGTTCATTAATTAATAATGATCAAATTTATAATGTAATTGTTACTTCACATGCTTTTATTATAATTTTTTTTATA
GTAATACCTATTATAATTGGAGGATTTGGAAATTGATTAATTCCATTAATAGTATCTACTCCAGATATAGCTTTTCCTCG
AATAAATAACTTAAGATTTTGATTACTTCCTCCTTCTTTATTACTTTTAATATCCTCTTCTATAGTTGAATCTGGAGCTG
GGACAGGTTGAACTGTTTATCCTCCTCTTTCTAATAATATATCTCATAGAGGAATAAGAGTTGATATAGCTATTTTTTCT
CTTCATTTAGCTGGAATTTCTTCTATTTTAGGAGCAATTAATTTTATTGTTACAATTATTAATATACGATCAAATTTAAT
TACTTTAGAAAAACTTCCTTTATTTATTTGAGCAATTTTAATTACAACTATTTTATTATTAATAGCTTTACCCGTTTTAG
CAGGAGCTATTACAATACTTTTAACAGATCGAAATTTTAATACTTCATTTTTTGATCCTAATGGAGGAGGGGATCCTATT
TTATATCAACATTTATTT
>PPELE503-11|Araneae|COI-5P|JN308685
AACTTTATATTTATTGTTTGGAGCTTGATCAGCTATAGTGGGGACTGCTATAAGAGTTTTGATTCGAACGGAATTAGGAT
TTTCTGGAGGTTTTATGAGAGATGATCATTTATATAATGTGATTGTTACTGCTCATGCTTTTGTTATAATTTTTTTTATA
GTTATACCGATTTTGATTGGGGGGTTTGGGAATTGGTTGGTTCCTTTAATATTAGGAGCTCCTGATATAGCTTTTCCTCG
TATAAATAATTTAAGATTTTGATTACTTCCTCCTTCTTTATTATTATTATTTATTTCTTCTATAGTTGAAGTTGGGGTTG
GGGCTGGATGAACTGTTTATCCTCCTTTATCATCTATTGTTGGTCATTCTGGAAGATCTATAGATTTTGCTATTTTTTCT
TTACATTTAGCTGGGGCTTCCTCTATTATAGGAGCTATTAATTTTATTTCAACTATTTTAAATATACGTTCTTATGGGAT
AACTATGGAAAAGGTCCCTTTATTTGTGTGATCAGTATTAATTACTGCAGTGTTATTATTATTATCTTTACCTGTATTAG
CAGGAGCTATTACTATATTGCTAACTGATCGAAATTTTAATACTTCTTTTTTTGATCCTGCTGGGGGAGGGGATCCTATT
TTATTTCAACATTTATTT
>GENHP1172-12|Mesostigmata|COI-5P
AACTATATATTTAATTTTTGCAGCTTGAGCTGGTATACTAGGAACAGCTTTAAGTATAATTATTCGTACAGAGCTTGGGC
AACCAGGCTCTTTAATTAGAGATGACCAAATTTATAACGTAGTAGTAACAGCTCATGCTTTTATTATAATTTTCTTTATA
GTGATACCTGCCTTAATCGGAGGATTTGGAAACTGACTAGTCCCTTTAATACTGTCCGCTCCTGATATAGCGTTCCCCCG
TATAAATAACATAAGGTTTTGGCTTTTACCCCCTTCACTAATTCTTTTAACAAGATCCTCTATAGTAGAATCTGGAGCTG
GCACCGGATGAACAGTATACCCCCCTTTGTCAAATAATATTTCTCATAGAGGGAGAGCTGTCGATTTAGCTATTTTTTCT
CTACATTTAGCAGGGATTTCCTCAATTCTGGGGTCTATTAATTTTATCACAACTATTATAAATATACGCCCAAAAGAAAT
AACATTAGAGCAAATACCCTTATTTGTTTGATCTGTATTTATTACAACTATCTTATTACTTTTATCTCTTCCTGTATTAG
CAGGAGCTATCACTATGCTATTAACAGATCGTAATTTTAATACATCATTTTTTGACCCAAGAGGAGGAGGAGACCCTATT
TTATACCAACATCTTTTT
>SPIRU699-11|Araneae|COI-5P|JF886917
GAGTTTATATTTTATTTTTGGAGCTTGAGCGGCTATAGTGGGGACAGCAATAAGAGTATTAATTCGAATTGAGTTAGGAC
AGGTTGGAAGATTATTAGGGGATGATCAATTGTATAATGTGATTGTTACAGCTCATGCTTTTGTTATAATTTTTTTTATA
GTTATACCAATCTTAATTGGGGGTTTTGGAAATTGGTTAGTACCTCTTATATTGGGGGCTCCGGATATAGCTTTCCCCCG
TATAAATAATTTAAGATTTTGGTTATTACCCCCATCTTTGTTTTTATTATTTGTTTCAAGAATAGATGAGATGGGAGTGG
GGGCAGGATGAACGGTGTATCCTCCTCTCGCTTCATTAGATGGGCATTCTGGGAGATCGGTGGATTTCGCTATTTTTTCT
TTACATTTGGCTGGGGCTTCTTCTATTATAGGGGCTATCAATTTTATTTCCACTATTTTAAATATACGAGGTTATGGGAT
AACTATAGAGAGGATTCCTTTATTTGTGTGATCTGTTTTAATTACTGCTGTTCTTTTGTTATTATCCTTACCTGTTTTAG
CAGGGGCTATTACTATATTATTAACAGATCGAAATTTTAATACGTCATTTTTTGATCCATCTGGGGGAGGAGATCCTGTT
TTATTCCAGCATTTATTT
>ARONT499-10|Pachygnathaautumnalis|COI-5P|HQ924394
AAGTTTATATTTTATATTTGGTGTTTGGGCTGCGATAGTTGGGACTGCGATAAGAGTTTTAATCCGTATTGAATTAAGTC
AAACTGGAAGATTTTTAGGAGATGATCAGTTATATAATGTTATTGTGACTGCACATGCTTTTATTATAATTTTTTTTATG
GTTATACCTATTTTAATTGGTGGGTTTGGAAATTGGTTGGTCCCTTTAATATTAGGTGCACCAGATATGGCGTTTCCTCG
TATAAATAATTTAAGATTTTGATTATTACCTCCTTCGTTGTTTATATTGTTTATTTCTTCTATAGTTGATGTAGGGGTAG
GAGCTGGCTGAACTGTGTATCCTCCTCTAGCCGGGCTAGAGGGACATTCTGGTAATTCTGTAGATTTTGCTATTTTTTCT
CTTCATTTAGCGGGAGCTTCATCTATTATGGGGGCTATTAATTTTATTTCTACTATTATTAATATACGGATGAGTGGAGT
TACTATAGAGAAAGTTCCTTTGTTTGTTTGGTCAGTTTTGATTACAGCAGTGCTTCTTTTACTTTCTTTACCTGTATTAG
CAGGTGCAATTACAATACTGTTAACTGATCGAAATTTTAATACATCTTTTTTTGACCCTTCAGGGGGAGGGGATCCTATT
TTATTTCAACATTTGTTT
>ETKII510-12|Araneae|COI-5P
AACGTTATATTTATTATTTGGAACATGAGCTGCTATAGTTGGAACTGCTATAAGAGTTTTAATTCGAATAGAGTTAGGTA
ATCCTGGAAGTTTATTAGGAGATGATCATCTTTATAATGTTGTGGTTACGGCGCATGCTTTTGTTATAATTTTTTTTATA
GTGATGCCTATTATAATTGGGGGGTTTGGAAATTGATTAATTCCTTTAATAGTAGGAGCTCCTGATATATCGTTTCCTCG
AATAAATAATTTATCTTTTTGATTGTTGCCTCCTTCTTTATTTTTATTGTTTATGTCTTCTATGGTAGAGATAGGAGTTG
GGGCAGGTTGAACTGTTTATCCTCCTTTGGCTTCTAGAGTGGGTCATATAGGTAGATCAATAGATTTTGCTATTTTTTCT
TTACATTTAGCTGGGGCTTCTTCTATTATAGGTGCAATTAATTTTATGTCAACTATTATTAATATACGTTCGGTTGGAAT
AAGAATAGAGAGGGTTCCTTTATTTATTTGATCGGTATTTATTACTGTTATTTTATTATTGTTATCTTTACCAGTATTAG
CTGGGGCCATTACAATATTATTAACTGATCGAAATTTTAATACTTCTTTTTTTGATCCTGCAGGGGGTGGAGATCCAATT
TTATTTCAGCATTTATTT
>SSPAA7578-13|Araneae|COI-5P
GACGTTATATTTAATTTTTGGGGCTTGAGCTGCTATAGTAGGTACTGCAATAAGAGTTTTAATTCGAATTGAGTTAGGCC
AAACGGGAAGAATATTGGGGGATGATCATTTGTATAATGTTCTTGTAACAGCTCACGCTTTTATTATAATTTTTTTTATA
GTGATGCCTATTTTAATTGGGGGGTTTGGAAATTGATTAGTCCCTTTGATATTAGGGGCTCCAGATATGGCTTTCCCTCG
TATAAATAATTTAAGATTTTGGTTACTTCCTCCTTCTTTATTAATATTATTCATTTCTTCTATAGTAGAGATAGGAGTTG
GAGCAGGTTGAACTGTGTATCCCCCCTTGGCTGGATTGGAGGGGCATTCTGGGAGATCTGTAGATTTTGCTATTTTTTCA
TTACATTTAGCTGGAGCTTCTTCTATTATAGGGGCTATTAATTTTATTTCTACGATCTTGAATATACGAGCATATAATAT
TAGTATAGAAAAGGTTTCTTTATTTGTGTGGTCTGTATTAATTACGGCGGTCCTTTTATTATTATCTTTACCTGTTTTAG
CAGGGGCTATTACTATATTATTAACTGATCGAAATTTTAATACTTCTTTTTTTGA
>SPICR1035-11|Araneae|COI-5P
AACATTATATTTAGTATTTGGTGCTTGAGCTGCTATAGTTGGTACGGCTATAAGAGTATTGATTCGAATTGAATTAGGTC
AACCAGGAAGATTTATTGGTGATGATCAATTATATAATGTAATTGTAACGGCACATGCGTTTGTGATAATTTTTTTTATA
GTAATACCAATTTTAATTGGTGGTTTTGGGAATTGATTGGTACCATTGATATTAGGTGCACCAGATATGGCTTTTCCTCG
AATGAATAATTTAAGATTTTGATTATTACCTCCATCGTTGTTTCTTTTAATTATTTCTTCAATAGTAGAAATAGGAGTAG
GTGCTGGGTGAACTGTATATCCACCATTAGCTAGATTAGAAGGACATGCTGGAAGTTCAGTAGATTTTGCAATTTTTTCT
TTACATTTAGCAGGTGCTTCATCTATTATAGGAGCCATTAATTTTATTTCAACAATTATTAATATACGATTTTATGGAAT
AACTATGGAGAAGGTTCCTTTGTTTGTATGATCGGTATTAATTACTGCCGTTCTATTACTATTATCTTTACCAGTATTGG
CAGGTGCTATTACTATATTATTAACTGATCGAAATTTTAATACATCATTTTTTGATCCTTCTGGGGGTGGTGATCCTATT
TTATTTCAGCATTTATTT
>SPICR1223-11|Araneae|COI-5P
AACTTTATATTTATTATTTGGATCTTGAGCTGCTATAGTAGGAACAGCAATAAGAGTATTAATTCGAATAGAATTAGGTC
AATCTGGGAGATTGATGGGTGATGATCATTTATATAATGTAATTGTAACTGCTCATGCATTTGTCATAATTTTTTTTATA
GTAATACCTATTTTAATTGGAGGTTTTGGTAATTGATTAATTCCTTTAATGTTAGGAGCTCCTGATATAGCTTTTCCTCG
AATAAATAATTTAAGATTTTGATTATTACCACCTTCTTTAATTATATTATTTGCATCATCTATAGTAGAAATAGGAGTTG
GTGCGGGTTGAACTGTTTATCCACCATTAGCTTCTTCTGTTGGTCATATGGGAAGAGCAATAGATTTTGCTATTTTTTCT
TTACATTTAGCTGGAGCATCATCTATTATAGGTGCTATTAATTTTATTTCTACTGTAATTAATATACGATCTATTGGAAT
AAGTATAGAAAAAATTCCTTTGTTTGTTTGATCTGTTTTTATTACAGCAGTATTATTATTATTATCTTTACCTGTATTAG
CAGGTGCTATTACTATATTATTAACAGATCGTAATTTTAATACTTCTTTTTTTGATCCAGCTGGGGGAGGAGATCCTATT
TTATTTCAACATTTGTTT
>MYMCC331-11|Cunaxidae|COI-5P|JX834714
ATCTCTTTATTTTATATTTGGTTTATGATCTGCTTTTTTGGGTGCTTCTTTTAGTAGTTTAATTCGATTAGAGTTAATAT
TTCCTCAGAATTTAATTTTTAATGATCAAATTTATAATAGTATTGTTACAACACATGCCTTTATTATAATTTTTTTTGTA
GTAATACCTTTAATAATTGGTGGATTTGGAAATTGACTTACTCCTATAATATTAGGTGCAGCTGACTTAGCTTTTCCTCG
AATAAATAATATAAGATTTTGACTTCTCCCTCCTTCAATTATTTTATTAATTTTATCAAATTTTATAAATAGAAGTATTG
GAACAGGATGAACTATTTATCCTCCTTTATCTTTAATAAGATTTCATTCTGGGTTCTCTGTTGATTTATTAATTTTTTCT
TTGCATATTGCAGGAATTTCTTCCATTATAAGATCTATTAATTTTATTACAACTATTTTAAATATACGAAATCATATAAT
AAAATTAGAACAGATACCATTATTTATTTGATCTATTTTAATTACAACTATTCTGCTACTCTTAGCTTTACCTGTGTTAG
CTGGAGCAATTACAATACTTTTAACAGATCGAAATTTTAATACTTCTTTTTTTGACCCTTTAGGTGGAGGAGATCCAATT
CTATATCAACATTTATTT
>CHACA574-09|Achipteriacoleoptrata|COI-5P|JX835726
AACTCTTTATTTTATCTTTGGAGCATGAGCAGGTCTTTTAGGGTCTGCTTTAAGTGGACTTATCCGGTTAGAACTTGGTC
AACCGGGTTCTCTCATAGAAAATGATCAAATTTATAACACTATTGTAACAGCACACGCCTTTGTTATGATTTTCTTCATA
GTTATGCCTGTAATAATTGGAGGATTTGGAAATTGATTGGTTCCAATAATGATTGGGGCACAAGATATAGCTTTTCCTCG
AATAAATAATATAAGATTTTGATTATTACCCCCTTCTTTAACATTACTTTCATCTTCTGCTTTTGCTGGGATAGGAGCAG
GAACTGGGTGAACGGTTTACCCCCCTTTAGCTGGAAATTTATTCCACTCTGGATTTTCAGTAGACTTAGCAATTTTTAGT
TTACATTTAGCAGGTGCTTCTTCTATTCTAGGAGCTATTAACTTTATTACTACCATTATAAATATACGATCTTCTTCAAT
ATCTTTAGATTCGATTCCTTTATTTGTTTGATCAGTATTAATTACTGCCGTGTTATTACTTTTATCTTTACCAGTTTTGG
CAGGAGCAATTACTATGCTTTTAACAGATCGTAATTTTAATACTTCATTTTTTGATCCTTCAGGAGGTGGAGACCCTATC
CTTTATCAACATCTATTT
>MARC143-10|Sarcoptiformes|COI-5P|HQ991515
AACTCTATACTTTATTTTCGGAGCATGGGCTGGTCTTCTAGGGTCAGCTCTTAGTGGATTAATTCGGTTAGAACTAGGAC
AACCAGGATCTCTGATAGAAAACGACCAGATTTACAACACTATTGTAACAGCTCATGCCTTCGTCATAATCTTTTTTATA
GTAATACCTGTAATAATTGGAGGATTTGGGAATTGACTAGTTCCTATAATAATTGGAGCTCAAGATATAGCTTTCCCTCG
TATAAATAACATAAGATTTTGATTACTACCTCCTTCTTTAGCCCTACTTTCCTCTTCAGCATTTGCTGGAATGGGAGCAG
GAACTGGTTGAACAGTTTATCCTCCTTTATCAGGAAATCTATTTCACTCTGGGTTTTCAGTGGATTTAGCTATTTTTAGA
CTTCACCTAGCAGGGGCCTCCTCCATTCTGGGAGCCATCAATTTCATCACAACAATTTTAAATATGCGATCTTCCTCTAT
AACATTAGATTCTATCCCTTTATTTGTTTGATCTGTTTTAATTACAGCTGTTCTTTTACTTTTATCCCTTCCAGTATTAG
CTGGGGCTATCACTATGTTATTAACAGATCGTAACTTCAACACATCGTTTTTTGATCCTTCTGGAGGAGGGGATCCTATT
CTTTATCAACATCTTTTT
>GMCRB016-13|Araneae|COI-5P
ACATTATATTTAATTTTTGGTGCTTGGTCTGCTATAGTTGGAACTGCTATGAGTGTTATTATTCGAATGGAATTAGGGCA
AGTTGGAAGTTTTTTAGGTGATGATCAGTTGTATAATGTGATTGTAACGGCTCATGCATTTGTAATAATTTTCTTTATAG
TAATACCAATTATAATTGGTGGTTTTGGAAATTGAATAGTTCCTTTAATGTTAGGTGCTCCTGATATAGCGTTTCCTCGA
ATAAATAATTTAAGTTTTTGACTTCTCCCTCCTTCATTATTTTTGTTGTTTATTTCATCTATGGTTGAAATAGGTGTTGG
AGCTGGATGAACAGTTTATCCTCCTTTAGCTTCAATTATAGGACACGCTGGAAGTGCGGTGGATTTTGCTATTTTTTCTT
TACATTTAGCTGGAGCTTCCTCTATTATAGGAGCAGTAAATTTTATCTCTACAATTATTAATATACGAATAGTTGGAATA
AGAATAGAAAAAGTTCCGCTTTTTGTCTGATCTGTTTTAATTACTGCTGTATTATTATTACTTTCTTTACCTGTTTTAGC
AGGTGCTATTACTATATTATTAACAGATCGTAATTTTAATACATCTTTTTTTGATCCTGCAGGAGGA
>FBCON321-13|Ixodida|COI-5P
AACAATATATTTAATTTTTGGGAGATGAGCTGGAATAATAGGAATAAGAATAAGAATTCTTATTCGAATAGAACTCAGCC
AGCCTGGTACATTAATTGGAAATGATCAAATTTATAATGTAATTGTTACTGCTCATGCCTTTATTATAATTTTCTTTATA
GTAATACCTATTATAATTGGGGGGTTCGGAAACTGACTAGTTCCAATCATATTAGGTGCCCCAGATATAGCTTTCCCACG
AATAAATAACATAAGATTCTGATTACTCCCACCTTCATTATTCTTGTTGGTTAATTCCTCTTTAATTGAATCAGGAGCAG
GAACCGGATGAACAGTTTACCCTCCTTTATCCTCTAATCTATCGCACTATGGTCCTTCAGTAGATTTAGCAATTTTCTCT
CTTCATTTAGCAGGAGCATCATCTATTTTAGGGGCAATTAATTTTATTACCACAATTATTAATATACGATCAATCGGAAT
AACACTTGAACGAATACCCTTATTTGTATGATCAGTACTAATTACCGCAATTTTACTTTTACTTTCATTACCTGTTTTAG
CAGGTGCAATTACTATATTACTAACTGATCGAAATTTTAATACATCATTCTTTGATCCTTCAGGAGGAGGAGATCCAATT
TTATATCAACATTTATTC
>CNPCF136-13|Sarcoptiformes|COI-5P
AACTTTATATTTCATTTTCGGAGCCTGAGCTGGATTATTAGGATCCGCTTTGAGGGGATTAATTCGGCTAGAACTCGGAC
AGCCAGGATCTTTGTTAGAGAACGACCAAATTTACAACACTATTGTGACAGCCCATGCTTTTGTGATAATTTTTTTTATG
GTGATACCAGTAATAATCGGGGGCTTTGGCAACTGACTGGTGCCTATAATAATTGGGGCTCAAGACATAGCTTTTCCACG
AATAAACAATATAAGATTTTGACTTCTTCCCCCTTCTCTAGCTTTACTCTCGTCTTCCGCTTTTGCTGGTATGGGGGCTG
GAACTGGTTGAACAGTGTACCCCCCTTTAGCTGGTAATCTTTTTCATTCTGGAATTTCAGTAGATCTTGCCATTTTTAGA
CTTCATTTGGCAGGAGCTTCATCGATTTTAGGGGCAATTAATTTTATCACAACTATTTTAAATATACGATCTTCTTCCAT
GACTTTAGACTCAATCCCATTATTTGTTTGATCTGTTCTTATTACCGCAGTACTACTACTGCTATCCCTCCCTGTACTGG
CTGGAGCTATTACAATACTCCTCACGGACCGTAATTTTAACACAACATTTTTTGACCCCTCT
>TWSC013-07|Arctosaraptor|COI-5P|KF367903
ACTTTATATTTAATATTTGGTGTTTGATCTGCTATAGTAGGAACTGCTATAAGAGTGTTAATTCGACTTGAGTTAGGACA
TTCTGGTAGTTTATTAGGGGATGATCATTTGTATAATGTAATAGTTACTGCTCATGCTTTTGTTATAATTTTTTTTATAG
TAATACCTATTTTAATTGGGGGATTTGGGAATTGATTAATTCCTTTAATATTAGGAGCTCCTGATATATCTTTTCCTCGA
ATGAATAATCTTTCTTTTTGATTGTTACCTCCTTCTTTATTTTTATTGTTTATATCTTCTATAGTAGAAATAGGAGTGGG
AGCAGGATGAACAGTTTATCCTCCTTTATCTTCTTCTATAGGTCATATAGGGAGATCTATAGATTTTGCTATTTTTTCTT
TACATTTAGCTGGAGCTTCATCTATTATAGGAGCTATTAATTTTATTTCTACAATTGTAAATATACGTTTAATTGGTATA
TCTATAGAGAAAGTTCCTTTATTTGTATGATCGGTTTTTATTACCGCTATTTTATTGTTATTATCTCTTCCTGTGTTAGC
AGGTGCTATTACTATATTGTTAACTGATCGAAATTTTAATACTTCTTTCTTTGACCCTGCTGGGGGAGGGGATCCTATTT
TATTTCAACATTTATTT
>ARBCM094-13|Araneae|COI-5P
AACTTTATATTTGGTGTTTGGAGCATGATCTGCTATAGTAGGAACTGCAATAAGAGTTTTAATTCGAATTGAGTTAGGGC
AACCTGGTAGTTTTTTAGGGGATGATCATTTATATAATGTAATTGTTACGGCACATGCTTTTGTGATAATTTTTTTTATA
GTTATACCTATTTTGATTGGAGGATTTGGGAATTGATTGGTACCCTTAATATTAGGGGCACCTGATATAGCTTTTCCTCG
AATAAATAATTTAAGTTTTTGATTATTACCCCCTTCTTTATTGTTGTTATTTATTTCTTCTATGGTGGAAATAGGAGTAG
GGGCAGGATGAACTATTTATCCGCCATTAACTGGTACAATGGGCCATGCTGGTAGATCAGTAGATTTTGCTATTTTTTCT
CTTCATTTAGCTGGAGCTTCTTCTATTATGGGTGCTATTAATTTTATTTCTACTATTATTAATATACGTTCTACAGGAAT
AAGAATAGAAAAAGTACCATTATTTGTATGATCTGTATTAATTACTGCTATTTTATTATTATTGTCTTTACCTGTTTTAG
CGGGTGCTATTACTATATTATTGACTGATCGAAATTTTAATACTTCTTTTTTTGATCCAGCTGGAGGGGGGGATCCAATT
TTATTTCAGCATTTATTT
>CHACB1040-10|Phytoseiidae|COI-5P|HM907171
AACTTTATATTTTTTATTTGCTGTTTGATCTGCTATAGTGGGTTCTTCTATAAGATTTTTAATTCGAATTGAGTTATTTC
AGCCAGGTTCTTTGTTAGGGAATGATCAGTTATATAATGTAATTGTGACAGCCCATGCTTTTGTTATAATTTTTTTTATG
GTTATACCCGCTATAATTGGAGGGTTTGGTAATTGACTAGTTCCAATTATGATTCATTCACCGGATATAGCTTTTCCTCG
GATAAACAATATGAGATTTTGATTGTTACCCCCTTCTTTAGTGTTTTTATTGATTTCTTCTTATATTGATACAGGTGTGG
GTACAGGGTGAACAGTATACCCTCCTCTATCTACGAGAGTTTTTCATAGAGGGGCGGCTGTTGATTATGCTATTTTTAGG
CTTCATTTAGCAGGAGTTTCTTCTATTATAGGGGCTATTAATTTTATTAGAACCATTATTAATATGCGGCCTATAGTAAT
GTTTATAGAAAAAATACCCTTATTTGTTTGATCGGTTTATATTACAGCTATTTTGTTGTTATTATCTTTACCTGTGTTAG
CCGGGGCTTTGACCATGCTTTTGACGGATCGTAATTTTAATACCACTTTTTTTGACCCCAGGGGGGGAGGAGATCCTGTT
TTATACCAGCACTTGTTT
>MIONB011-10|Mesostigmata|COI-5P|HM887562
GACTATATACTTAATTTTTGCAGCTTGAGCTGGAATATCAGGAACAGCTCTAAGCATAATTATTCGAACAGAACTAGGGC
AACCTGGATCTTTAATCGGAGACGACCAAATTTATAACGTAGTGGTAACAGCTCATGCCTTTGTAATAATTTTTTTTATA
GTGATACCCGCTTTAATCGGGGGATTTGGTAATTGACTTATTCCCTTAATAATTTCTGCCCCTGATATGGCATTTCCTCG
TATAAACAATATAAGATTTTGACTACTACCCCCTTCATTAATCCTTTTAATAAGTTCCTCCATAGTTGAATCTGGAGCAG
GAACAGGTTGAACGGTATACCCCCCTCTAGCAAGAAACATCTCCCATAGAGGAAGTGCTGTAGACCTAGCCATTTTTTCT
CTGCATTTAGCAGGAATTTCTTCTATTTTAGGATCTATTAACTTTATCACAACAATCATAAATATGCGACCAAAAGAAAT
GTCCCTAGAACAAATACCCTTATTTGTTTGATCCGTCCTTATCACAACTATCCTACTACTGCTATCTTTACCTGTATTAG
CAGGAGCTATTACAATATTACTAACAGACCGTAATTTTAATACCTCTTTTTTTGACCCAAGAGGAGGGGGGGACCCTATC
TTATATCAACATCTTTTT
>BCMS305-12|Araneae|COI-5P
AACTTTGTATTTAATGTTTGGTTCATGGTCTGGAATGATAGGATTAGCTCTGAGAATGATATTGCGAATCGAGTTAGGAC
AACTAGGTAGATTTATTGGGGATGATCATATATATAACGTTGTAGTTACAGCACACGCTTTAGTCATGATTTTTTTTATA
GTGATACCTATTTTGATTGGTGGTTTCGGGAATTGATTAATTCCTCTAATATTAGGAGCGCCAGATATGGCTTTTCCCCG
AATGAATAATTTAAGATTTTGGTTATTACCCCCTTCGCTTATAATATTAATCTTCTCTTCTTTTAGAGAAATGGGTGTGG
GAGCAGGATGAACTATTTATCCTCCTCTTTCTGGAAGAGGATCACATTATGGAATTTCTGTAGATATAGCTATTTTTTCT
TTACATTTAGCGGGTATATCTTCTATTATAGGTGCTATTAATTTTATTACGACTATTTTAAATATACGTAGAGAAGGTAT
AAGTTTTGAAAAAGTACCGTTATTTGTGTGATCTGTGTTAGTAACAGCTATCTTATTATTGTTGTCATTGCCAGTATTAG
CGGGGGCTATTACTATACTATTAACGGACCGAAATTTTAATACTTCTTTTTTTGATCCTGCTGGGGGAGGTGATCCTATT
TTATTTCAACATTTATTT
>HGM116-11|Sarcoptiformes|COI-5P
AACTTTATACTTTATTTTTGGGGCCTGGGCTGGACTTCTTGGGTCAGCCCTCAGAGCTCTAATTCGGCTTGAATTAGGAC
AACCCGGATCTTTAATGGACAATGATCAAATTTACAACACAATTGTTACAGCACACGCCTTTGTCATAATTTTCTTTATA
GTTATACCTGTTATAATTGGAGGGTTTGGGAATTGGCTGGTTCCAATAATAATTGGGGCTCAAGACATGGCATTTCCTCG
TATAAACAATATAAGATTTTGACTACTGCCACCTTCACTCACTTTACTCTCATCATCTGCTTTTGCTGGGCTAGGGGCTG
GAACTGGATGAACCGTTTACCCCCCATTAGCAAATAACCTATTTCATTCAGGAATTTCCGTAGATTTGGCCATTTTTAGA
TTACATTTAGCAGGTGCCTCTTCTATTTTGGGAGCTATCAATTTCATTACCACCATTATAAATATGCGTTCAACTTCTAT
CACCCTAGATTCTATCCCCCTATTTGTTTGATCTATTCTAATTACAGCTGTTCTGTTACTTTTGTCTCTCCCTGTTTTAG
CCGGAGCTATCACCATATTACTTACCGATCGCAACTTTAATACGTCCTTTTTTGACCCATCGGGAGGAGGGGATCCCATT
CTGTACCAACATTTATTT
>SPIRU1722-12|Araneae|COI-5P
AACTTTATATTTGGTTTTTGGAGCTTGGTCAGCTATAGTTGGAACAGCAATAAGAGTGTTAATTCGTATAGAATTAGGTC
AGACTGGTCATTTTATTGGTGATGATCATTTGTATAATGTGATTGTAACTGCGCATGCTTTTGTTATAATTTTTTTTATA
GTAATACCTATTTTGATTGGGGGTTTTGGTAATTGACTGGTTCCTTTGATATTAGGTGCTCCTGATATAGCTTTTCCTCG
TATAAATAATTTGAGTTTTTGATTATTGCCTCCTTCTTTAATATTATTATTTATTTCTTCTATAGCTGAGATAGGGGTTG
GAGCTGGATGAACAGTTTATCCACCATTAGCATCTATTGTAGGTCATAATGGGAGTTCTGTTGATTTTGCTATTTTTTCT
TTACATTTAGCAGGTGCTTCCTCAATTATAGGGGCTATTAATTTTATTTCTACAGTTATTAATATACGATCGGTAGGAAT
AACTTTAGATAAGGTACCTTTATTTGTATGATCGGTGGCGATTACTGCAGTTTTATTATTATTGTCTTTACCTGTGTTAG
CAGGTGCTATTACTATATTGTTAACTGATCGAAATTTTAATACTTCTTTTTTTGATCCAGCTGGAGGGGGGGATCCTATT
TTATTTCAACATTTATTT
>MIONB037-10|Mesostigmata|COI-5P|HM887574
AACTATATACCTAATTTTTGCAGCTTGAGCAGGTATAGTCGGTACAGCCATAAGTATTATTATCCGAGCTGAGCTAGGAC
AACCGGGAGCTTTAATCGGAGAGGACCAAATCTATAATGTAGTAGTCACAGCCCATGCATTTGTAATAATTTTTTTCATA
GTAATACCAGCCTTAATCGGAGGCTTTGGAAACTGACTCGTCCCCTTAATAATCTCTGCACCTGATATAGCTTTCCCTCG
AATAAATAATATAAGTTTCTGACTTCTACCCCCCTCTTTAACCCTTCTTCTTTACTCCTCCCTAGTAGAATCAGGAGCTG
GCACTGGATGAACTGTATACCCCCCCTTGGCGGGAAATATATCCCACAGAGGGGGGGCCGTAGATCTGGCTATTTTTTCC
CTTCATTTAGCAGGAGCTAGCTCTATCTTAGGGTCTATTAATTTTATTACAACTATCATAAACATACGGCCAAAAAATAT
AAGCCTAGAGCAAATACCTCTATTTGTTTGATCTGTATTCATTACAACTATTCTCTTGCTACTCTCACTTCCTGTACTAG
CAGGGGCAATCACAATGCTCCTAACGGACCGAAATTTTAACACCTCTTTCTTTGACCCTAGCGGGGGAGGGGACCCTATT
CTCTATCAACACCTATTC
>SPICH182-09|Oreonetidesvaginatus|COI-5P|GU684013
AAGTTTATATTTCGTTTTTGGGGCTTGGGCTGCTATAGTAGGAACAGCTATGAGAGTTTTAATTCGAATCGAATTAGGCC
AAACTGGTAGATTATTGGGGGATGATCAGTTGTATAACGTTATTGTTACAGCGCATGCTTTTGTTATAATTTTTTTTATA
GTTATACCTATTTTAATTGGGGGGTTTGGTAATTGGTTAGTTCCATTAATATTGGGGGCTCCTGATATAGCTTTTCCTCG
AATAAATAATTTAAGATTTTGACTTCTACCCCCCTCTTTGTTATTATTGTTTATTTCAAGTATGGATGAAATGGGAGTAG
GGGCAGGGTGGACAGTTTATCCCCCTCTTGCTTCTTTAGAAGGGCATTCTGGTAGTTCAGTAGATTTTGCTATTTTTTCT
TTACATTTAGCGGGGGCTTCTTCTATTATGGGGGCTATTAATTTTATTTCTACTATTTTAAATATGCGAGGTTATGGTAT
ATCTATAGAAAAGGTACCTTTATTTGTTTGATCTGTATTAATCACAGCTGTTTTGTTATTATTATCTTTACCAGTATTAG
CAGGTGCTATTACGATATTATTGACAGATCGGAATTTTAATACATCCTTCTTTGACCCATCCGGGGGGGGGGACCCTGTT
TTATTTCAGCATTTATTT
>SPIRU1323-11|Kaestneriarufula|COI-5P|KF368180
AACTTTATATTTAGTTTTTGGGGCTTGAGCAGCTATAGTTGGTACTGCTATAAGAGTATTAATTCGAATTGAATTAGGAC
AGACAGGAAGAATATTAGGGGATGATCATTTGTATAATGTAATTGTTACAGCTCATGCTTTTGTTATAATTTTTTTTATA
GTTATGCCAATTTTGATTGGAGGATTTGGTAATTGATTGGTTCCTTTAATATTAGGGGCTCCTGATATAGCTTTTCCTCG
TATAAATAATTTAAGATTTTGGCTTTTACCTCCTTCTCTTGCTATATTATTTATTTCTTCTATAGTTGAAATAGGAGTTG
GTGCTGGATGAACAGTTTATCCTCCTTTAGCTTCTTTGGAGGGTCATTCTGGGGTTTCTGTGGATTTTGCTATTTTTTCT
TTACATTTAGCGGGGGCTTCTTCTATTATAGGTGCTATTAATTTTATTTCTACTATTATAAATATACGATCTTATGATAT
TAGAATAGACAAAGTTTCATTATTTGTTTGATCGGTCTTAATTACTGCTGTTTTATTATTATTGTCATTACCAGTTTTAG
CGGGAGCTATTACTATATTATTAACTGATCGAAATTTTAATACTTCTTTTTTTGATCCAGCGGGAGGGGGTGATCCTGTT
TTATTTCAACATTTATTT
>GMFIA072-12|Araneae|COI-5P
TTCTTTATATTTTATTTTTGGTGCATGAGCTGCTATAGTGGGTACTGCTATAAGAGTCTTAATTCGAATTGAGTTGGGCC
AAACTGGAAGAATGTTGGGGGATGACCAATTATACAATGTAATTGTTACTGCACATGCGTTTGTTATAATTTTTTTTATA
GTTATACCAATTTTAATTGGAGGTTTTGGAAATTGGTTAGTTCCTTTAATATTAGGTGCTCCGGATATAGCTTTTCCCCG
TATGAATAATTTAAGATTTTGGTTATTACCTCCTTCTTTAATGTTATTGTTTATTTCAAGAATAGTTGAAATGGGAGTTG
GGACTGGATGAACTGTGTATCCACCTCTTGCGTCTTTGGAAGGACATGCTGGAAGTTCTGTTGACTTTGCTATTTTTTCT
CTTCATTTAGCTGGGGCCTCTTCTATTATAGGGGCTATTAATTTTATTTCCACTATTATTAATATGCGGGGATATGGTGT
TTCTATGGAGAAAGTTCCACTTTTTGTGTGGTCTGTCTTAATTACTGCTGTTTTATTACTTTTATCTCTTCCTGTTTTAG
CAGGGGCAATTACAATATTATTGACAGATCGAAATTTTAATACTTCTTTTTTTG
>JSOIE085-12|Mesostigmata|COI-5P
AACCTTGTATTTTATATTTGCTTTATGAAGAGGTTTTATGGGTAGTGCTTTAAGATTTTTAATTCGAATAGAGTTATCTC
AACCTGTAAGAATAATTGAAAATGAACAATTATATAATGTTATTGTTACTTCACATGCTTTTGTAATAATTTTTTTTATA
GTTATACCTTCTATAATTGGAGGTTTTGGAAACTGATTAGTACCTTTAATAATTAATGCTCCAGATATAGCCTTTCCACG
AATAAATAATATAAGTTTTTGATTACTTCCTCCATCTTTATTGTTTATAATTTTATCAATAATAGTAGAAAACGGGTCTG
GTACAGGTTGAACAGTTTATCCACCTCTTTCTAGAAATGTTTTTCATAGAAGAACATCTGTAGATTGAACAATTTTTAGA
TTACATCTAGCCGGTATCTCCTCTATTATAGGAGCTATTAATTTTATTTGTACTATCTTAAACATAAAAAAACAATCTAA
TATAGAAAATTTATCTTTATTTGTATGATCAATTTTTATTACAACTATTTTATTACTTCTTTCATTACCTGTACTAGCAG
GTGCAATTACAATATTACTTTCTGATCGAAATTTTAATACAAGATTCTTTGATCCTAGAGGAGGTGGAGACCCTATTTTA
TATCAACACTTATTT
>SPICR481-11|Araneae|COI-5P
TTCATTATATTTAATTTTTGGGGTTTGATCTGGAATAGTAGGAACTGCTATAAGAGTTTTGATTCGGGTTGAGTTAGGGC
AATTAGGAAGATTTTTAGGAGATGATCAATTATATAATGTTATTGTTACTGCTCATGCATTTATTATAATTTTTTTTATA
GTAATGCCTATTTTAATTGGGGGATTTGGAAATTGGTTAGTTCCAATAATATTAGGAGCTCCTGATATAGCTTTTCCTCG
AATGAATAATTTAAGTTTTTGGTTATTACCTCCGTCGTTGTTATTATTATTTATTTCATCAATAGTTGAAATAGGAGTAG
GAGCTGGATGAACTATTTATCCTCCTTTATCATCTATAGAGGGTCATGCTAGAAATTCTGTGGATTTTGCTATTTTTTCA
TTACATTTAGCAGGAGCTTCTTCTATTATAGGTGCTGTAAATTTTATTTCAACAATTATGAATATACGTTGTTATGAAAT
AAAATTGGAAAAAGTTTCATTATTTGTTTGGTCTGTATTTATTACTGCTGTGTTGTTATTATTATCTTTACCTGTGTTAG
CAGGTGCTATTACTATATTATTAACTGATCGAAATTTTAATACTTCTTTTTTTGATCCTTCAGGAGGAGGGGATCCTATT
TTATTTCAACATTTATTT
>SPIRU1991-12|Araneae|COI-5P
AACTTTATATTTAATTTTTGGTGCTTGAGCTGCTATAGTTGGAACTGCTATAAGAGTTTTAATTCGAATTGAATTAGGTC
AAACTGGAAGAATATTAGGAGATGATCATTTATATAATGTTATTGTTACTGCACATGCTTTTGTTATAATTTTTTTTATA
GTTATACCCATTTTAATTGGAGGATTTGGAAATTGGTTAGTTCCTTTAATATTAGGTGCTCCAGATATAGCTTTTCCTCG
AATGAATAATTTAAGATTTTGGTTACTTCCTCCTTCATTAATAATGTTGTTTATTTCTTCAATAGTGGAAATAGGAGTTG
GGGCAGGTTGAACTGTTTATCCTCCTCTAGCTTCTTTAGAAGGTCATTCAGGGAGATCTGTGGATTTTGCTATTTTTTCT
CTTCATTTAGCTGGGGCTTCTTCAATTATAGGGGCTATTAATTTTATTTCAACAATTATAAATATACGAGCTTATGATAT
AAGAATAGAAAAGGTTTCTCTATTTGTTTGATCAGTATTGATTACTGCAGTTTTATTATTGTTATCTTTACCTGTTTTAG
CAGGAGCTATTACTATATTATTAACTGATCGAAATTTTAATACTTCTTTTTTTGATCCTGCAGGAGGGGGAGATCCTGTT
TTATTTCAACATTTATTT
>HSYE010-11|Mesostigmata|COI-5P
TACGATTTATTTAATTTTTAGTATATGAGCAGGAGCAATTGGTACAGCTTTAAGAATAATTATTCGAATTGAATTAGGAC
AACCAGGAGTTTTTATTAATGATGATCAAATTTATAATACTATTGTTACTTCTCATGCATTTGTAATAATTTTTTTTATA
GTTATACCAGCAATAATTGGGGGATTTGGAAATTGATTAATTCCTTTAATAATTTCAGCTCCTGATATAGCTTTTCCTCG
TTTAAATAATATAAGATTTTGATTGTTAATTCCTTCTATTATTTTATTATTATTTTCTTCTTTTGTTGAGAGAGGAGTAG
GAACAGGATGAACAGTTTACCCTCCTTTAGCAAGATTATTATCTCATAGAGGGGTATCAGTTGATTTAGCTATTTTTAGA
TTACATTTAGCAGGAGCTTCATCAATTTTAAGATCAATAAATTTTATTACTACAATTTTAAATATACGACCAAAATCAAT
AAAAATAGAAATTATTCCTTTATTTGTTTGATCAGTTTTTATTACTACTATTTTACTTTTATTATCATTACCTGTGTTAG
CAGGAGCAATTACAATATTATTAACTGATCGAAATTTTAATACTTCTTTTTTTGATCCTAGAGGAGGTGGAGATCCAATT
TTATATCAACATTTATTT
>SSJAB1846-13|Trombidiformes|COI-5P
GACTTTATATTTTATTTTTGGTTTTTGGTCTGGATTGTTGGGTGCATCAATAAGTATTATTATTCGAATAAAATTAGCTA
ATCCTGGTTTTATAGGGCAAAATGATCAAATTTATAATGTTACTGTTACTGCTCATGCATTTGTAATAATTTTTTTCATA
GTAATGCCTATTATAATTGGAGGATTTGGTAATTGGTTAGTTCCTGTTATAATTGGGGCTCCTGATATAGCTTTTCCACG
AATAAATAATATGAGTTTTTGATTACTACCCCCATCTATTATAATATTGCTATTATCTTCATTTGCTGAAAGTGGAGCTG
GAACAGGATGAACTGTTTACCCACCACTATCTAATTATTTGTTTCATGGTGGAATTTCTGTTGATTTAACTATTTTTTCT
TTACACATAGCTGGTATTTCATCTATTTTAGGGGCTATTAATTTTATTACAACTATTATAAATATACGAATGAGTATAAT
AACTTTTGAGCGTTTACCCTTATTTGTTTGATCAGTATTAATTACTGCTGTTTTATTATTATTATCTCTACCTGTATTGG
CTGGAGCTATTACTATACTATTGACTGAT
>MYMCA202-11|Zerconidae|COI-5P|JX835880
TACTATATATTTAATTTTCAGTCTTTGGGCAAGGATATTAGGAATATCCTTAAGAATAATTATTCGAATTGAACTTGGAC
AGCCAGGTTCTTTACTTAATAATGACCAAATTTATAATGTTATTGTTACTGCCCATGCTTTTATTATAATTTTTTTTATA
GTTATACCAATTATAATTGGAGGATTTGGAAATTGATTAGTACCTTTAATATTAATAGCCCCTGATATAGCTTTTCCTCG
TATAAATAATATAAGATTTTGACTTTTACCTCCCTCTTTAATTCTTTTATTAACTTCTTCAATAATTGAATCAGGATCTG
[truncated: 63,391,638 more chars]
