# Supplementary material for: Species From Feces: Order-Wide Identification of Chiroptera From Guano and Other Non-Invasive Genetic Samples
Source: PLoS One. 2016 Sep 21;11(9):e0162342. doi: 10.1371/journal.pone.0162342 (PMC5031397; doi:10.1371/journal.pone.0162342)
Supplement: S3 Table — The primer-targeted regions of reference library sequences were evaluated as six datasets: unique amplicon regions against the full reference library, and five random subsamples of the reference library (see Methods). Classifications with the RDP Classifier were computed with confidence thresholds of 0.5–1.0, and performance was evaluated at the Genus and Species taxonomic level. While taxonomic classification with BLAST correctly classified high percentages of the reference sequences, the false positive rate was higher than for the RDP Classifier. We therefore chose RDP Classifier for identifying sequences generated from fecal samples, and selected a confidence threshold of 0.8 because this was an acceptable tradeoff between the number of correctly classified sequences and the risk of false positives. (XLSX) [file pone.0162342.s007.xlsx]

## Sheet: ClassificationPerformance
Classification peformance of RDP and BLAST at the Genus level																				Classification peformance of RDP and BLAST at the Genus level
	RDP																				BLAST
		0.5			0.6			0.7			0.8			0.9			1				e-value 0.01
Dataset	% Correct	FP	FN	% Correct	FP	FN	% Correct	FP	FN	% Correct	FP	FN	% Correct	FP	FN	% Correct	FP	FN		% Correct	FP	FN
Unique Amps Vs Full Refs	0.9806	0.0074	0.012	0.9744	0.0062	0.0194	0.9683	0.0052	0.0265	0.9589	0.0049	0.0363	0.944966	0.00485594	0.0501781	0.81774	0.00356102	0.178699		0.9987	0.0013	0
Subsample 1	0.9705	0.0066	0.023	0.9672	0.0066	0.0262	0.9639	0.0033	0.0328	0.9508	0.0033	0.0459	0.9443	0.0033	0.0525	0.8492	0.0033	0.1475		0.9738	0.0197	0.0066
Subsample 2	0.9745	0.0032	0.0223	0.965	0.0032	0.0318	0.9618	0.0032	0.035	0.9459	0.0032	0.051	0.9268	0.0032	0.0701	0.8121	0.0032	0.1847		0.9745	0.0191	0.0064
Subsample 3	0.976	0.0068	0.0171	0.9726	0.0034	0.024	0.9658	0.0034	0.0308	0.9658	0.0034	0.0308	0.9486	0.0034	0.0479	0.863	0.0034	0.1336		0.9897	0.0103	0
Subsample 4	0.9798	0.0101	0.0101	0.9764	0.0067	0.0168	0.963	0.0067	0.0303	0.9495	0.0067	0.0438	0.9327	0.0067	0.0606	0.8047	0.0034	0.1919		0.9764	0.0236	0
Subsample 5	0.9813	0.0075	0.0112	0.9701	0.0037	0.0261	0.9627	0.0037	0.0336	0.9515	0.0037	0.0448	0.944	0.0037	0.0522	0.8284	0	0.1716		0.9851	0.0149	0
Classification peformance of RDP and BLAST at the Species level																				Classification peformance of RDP and BLAST at the Species level
	RDP																				BLAST
		0.5			0.6			0.7			0.8			0.9			1				e-value 0.01
Dataset	% Correct	FP	FN	% Correct	FP	FN	% Correct	FP	FN	% Correct	FP	FN	% Correct	FP	FN	% Correct	FP	FN		% Correct	FP	FN
Unique Amps Vs Full Refs	0.9567	0.0344	0.0089	0.9477	0.0303	0.022	0.9291	0.0268	0.044	0.9133	0.022	0.0647	0.8872	0.0155	0.0974	0.7668	0.0079	0.2253		0.9897	0.0103	0
Subsample 1	0.8897	0.0897	0.0207	0.8862	0.0759	0.0379	0.8828	0.0621	0.0552	0.869	0.0517	0.0793	0.8207	0.0448	0.1345	0.7172	0.0207	0.2621		0.9069	0.0897	0.0034
Subsample 2	0.9329	0.0495	0.0177	0.9258	0.0459	0.0283	0.9223	0.0353	0.0424	0.9011	0.0283	0.0707	0.8834	0.0141	0.1025	0.7456	0.0071	0.2473		0.9258	0.0707	0.0035
Subsample 3	0.9357	0.0464	0.0179	0.925	0.0393	0.0357	0.9071	0.0286	0.0643	0.9036	0.0214	0.075	0.8536	0.0071	0.1393	0.675	0.0036	0.3214		0.9179	0.0821	0
Subsample 4	0.8963	0.0669	0.0368	0.8763	0.0602	0.0635	0.8662	0.0401	0.0936	0.8528	0.0334	0.1137	0.8261	0.0201	0.1538	0.6455	0.01	0.3445		0.9164	0.0803	0.0033
Subsample 5	0.9306	0.0486	0.0208	0.9201	0.0313	0.0486	0.9132	0.0278	0.059	0.8854	0.0243	0.0903	0.8681	0.0174	0.1146	0.7153	0.0104	0.2743		0.934	0.066	0
Subsamples: The full reference library was clustered at 100% identity with USEARCH. 5% of the clustered reference sequences were randomly selected. These sequences were removed from the reference set for classification performance testing. Five random subsamples were generated for classification performance testing.
FP - False positive. Defined as sequences incorrectly classified to the Genus or Species level.
FN - False negative. Defined as sequences not classified to the Genus or Species level (e.g. a sequence was correctly classified to the Family taxonomic level but not assigned to a Genus).
0.5, 0.6, 0.7, 0.8, 0.9, 1.0 - confidence thresholds applied to RDP classificatons
