# Supplementary material for: Species From Feces: Order-Wide Identification of Chiroptera From Guano and Other Non-Invasive Genetic Samples
Source: PLoS One. 2016 Sep 21;11(9):e0162342. doi: 10.1371/journal.pone.0162342 (PMC5031397; doi:10.1371/journal.pone.0162342)
Supplement: S4 Table — (XLSX) [file pone.0162342.s008.xlsx]

## Sheet: S8 Table
Collection number (Table 2)	GenBank accession number
ASNHC17397_LENI	KX755952
ASNHC17398_LENI	KX755953
ASNHC17399_LENI	KX755954
BCI_EIHE_G0086	KX755903
BCI_EUFL_WP0001	KX755923
BCI_EUFL_WP0002	KX755924
BEGL_ANPA_G0001	KX755879
BEGL_ANPA_G0002	KX755880
BEGL_ANPA_G0003	KX755881
BEGL_ANPA_G0004	KX755882
BEGL_ANPA_G0005	KX755883
BEGL_ANPA_G0006	KX755884
BEGL_ANPA_G0007	KX755885
BEGL_ANPA_G0008	KX755886
BEGL_ANPA_G0009	KX755887
BEGL_ANPA_G0010	KX755888
BEGL_ARJA_G0072	KX755889
BEGL_CAPE_G0069	KX755890
BEGL_CAPE_G0073	KX755891
BEGL_CAPE_G0074	KX755892
BEGL_CASU_G0055	KX755894
BEGL_CASU_G0061	KX755893
BEGL_COTO_G0011	KX755900
BEGL_EPFU_B0001	KX755904
BEGL_EPFU_B0002	KX755905
BEGL_EPFU_G0012	KX755906
BEGL_EPFU_G0013	KX755907
BEGL_EPFU_G0014	KX755908
BEGL_EPFU_G0015	KX755909
BEGL_EPFU_G0016	KX755910
BEGL_EPFU_G0017	KX755911
BEGL_EPFU_G0018	KX755912
BEGL_EPFU_G0019	KX755913
BEGL_EPFU_I0002	KX755914
BEGL_EPFU_I0003	KX755915
BEGL_EPFU_I0004	KX755916
BEGL_EPFU_I0005	KX755917
BEGL_EPFU_I0006	KX755918
BEGL_EPFUR_G0059	KX755919
BEGL_EPFUR_G0060	KX755920
BEGL_EPFUR_G0066	KX755921
BEGL_EPFUR_G0075	KX755922
BEGL_EUGL_G0076	KX755929
BEGL_EUPE_B0003	KX755933
BEGL_EUPE_I0007	KX755934
BEGL_EUUN_G0077	KX755935
BEGL_IDPH_I0001	KX755936
BEGL_IDPH_I0008	KX755937
BEGL_IDPH_I0009	KX755938
BEGL_LABL_G0067	KX755939
BEGL_LACI_I0011	KX755942
BEGL_LACI_I0012	KX755943
BEGL_LACI_I0013	KX755944
BEGL_LACI_I0014	KX755945
BEGL_LACI_I0015	KX755946
BEGL_LACI_I0016	KX755947
BEGL_LACI_I0017	KX755948
BEGL_LANO_I0010	KX755949
BEGL_LEYE_I0043	KX755955
BEGL_MACA_WP0003	KX755961
BEGL_MYAU_G0024	KX755962
BEGL_MYAU_G0025	KX755963
BEGL_MYAU_G0026	KX755964
BEGL_MYAU_G0027	KX755965
BEGL_MYAU_G0028	KX755966
BEGL_MYAU_G0030	KX755967
BEGL_MYCA_B0004	KX755987
BEGL_MYOC_G0034	KX755975
BEGL_MYOC_G0035	KX755976
BEGL_MYOC_G0036	KX755977
BEGL_MYOC_G0037	KX755978
BEGL_MYOC_I0022	KX755979
BEGL_MYOC_I0023	KX755980
BEGL_MYRI_G0068	KX755981
BEGL_MYSO_WP0004	KX755876
BEGL_MYSO_WP0005	KX755877
BEGL_MYSP_G0038	KX755988
BEGL_MYSP_G0039	KX755989
BEGL_MYSP_G0040	KX755990
BEGL_MYVE_G0041	KX755991
BEGL_MYVE_G0042	KX755992
BEGL_MYVE_G0043	KX755993
BEGL_MYVE_G0044	KX755994
BEGL_MYVE_G0045	KX755995
BEGL_MYVE_G0046	KX755996
BEGL_MYVE_G0047	KX755997
BEGL_MYVE_G0048	KX755998
BEGL_MYVO_G0089	KX756002
BEGL_MYVO_G0091	KX756001
BEGL_MYYU_WS0001	KX756003
BEGL_NOLE_G0078	KX756004
BEGL_NOLE_G0079	KX756005
BEGL_NYMA_I0024	KX756008
BEGL_NYMA_I0025	KX756009
BEGL_NYMA_I0026	KX756010
BEGL_NYMA_I0027	KX756011
BEGL_NYMA_I0028	KX756012
BEGL_PAHE_G0051	KX756013
BEGL_PHDI_G0080	KX756016
BEGL_PTPA_G0057	KX756017
BEGL_PTPA_G0065	KX756018
BEGL_PTPA_G0081	KX756019
BEGL_PTPE_G0062	KX756020
BEGL_PTPE_G0082	KX756021
BEGL_RHBI_G0053	KX756035
BEGL_RHBI_G0054	KX756034
BEGL_RHBI_G0083	KX756032
BEGL_RHBI_G0084	KX756033
BEGL_STPA_G0056	KX756041
BEGL_STPA_G0058	KX756039
BEGL_STPA_G0064	KX756040
BEGL_STPA_G0070	KX756042
BEGL_STPA_G0071	KX756043
BEGL_TABR_G0052	KX756044
BEGL_TABR_I0029	KX756045
BEGL_TABR_I0030	KX756046
BEGL_TABR_I0031	KX756047
BEGL_TABR_I0032	KX756048
BEGL_TABR_I0033	KX756049
BEGL_TABR_I0034	KX756050
BEGL_TABR_I0035	KX756051
BEGL_TABR_I0036	KX756052
BEGL_TABR_I0037	KX756053
BEGL_TABR_I0038	KX756054
BEGL_TABR_I0039	KX756055
BEGL_TABR_I0040	KX756056
BEGL_TABR_I0041	KX756057
BEGL_TABR_I0042	KX756058
BEGL_TOSA_G0063	KX756059
FFWCC_EUFL_G0020	KX755925
FFWCC_EUFL_G0021	KX755926
FFWCC_EUFL_G0022	KX755927
FFWCC_EUFL_G0023	KX755928
MSB_EUMA_121373	KX755930
MSB_EUMA_22756	KX755931
NMMNH_EUMA_4059	KX755932
NYSDEC_MYLU_I0018	KX755970
NYSDEC_MYLU_I0019	KX755971
NYSDEC_MYLU_I0020	KX755972
NYSDEC_MYLU_I0021	KX755973
OBTC_EIHE_G0085	KX755902
OBTC_PTVA_G0087	KX756022
OBTC_ROAE_G0088	KX756038
UA_CHME_B0005	KX755895
UA_CHME_B0006	KX755896
UA_CHME_B0008	KX755897
UA_LEYE_B0007	KX755958
UA_LEYE_B0009	KX755959
UA_LEYE_B0010	KX755960
UCSC_CHME_EB03CM001	KX755898
UCSC_CHME_EB03CM002	KX755899
UCSC_LEYE_WP201613LY07	KX755956
UCSC_LEYE_WP201616LY06	KX755957
UNH_COTO_Gd11762	KX755874
UNH_COTO_Gd11764	KX755901
UNH_LABO_Gd26866	KX755940
UNH_LABO_Gd26867	KX755941
UNH_LANO_Gd27811	KX755950
UNH_LANO_Gd27812	KX755951
UNH_MYGR_Gd27724	KX755968
UNH_MYGR_Gd27725	KX755969
UNH_MYLU_Gd24492	KX755875
UNH_MYLU_Gd24493	KX755974
UNH_MYSE_Gd23912	KX755982
UNH_MYSE_Gd23913	KX755983
UNH_MYSO_Gd24509	KX755986
UNH_MYSO_Gd24510	KX755878
UNH_MYVE_Gd14953	KX755999
UNH_MYVE_Gd14955	KX756000
UNH_NYHU_Gd26834	KX756006
UNH_NYHU_Gd26838	KX756007
UNH_PESU_Gd24489	KX756014
UNH_PESU_Gd24490	KX756015
UNH_RHCY_Gd29880	KX756023
UNH_RHCY_Gd29881	KX756024
UNH_RHFE_Gd20777	KX756025
UNH_RHFE_Gd20778	KX756026
UNH_RHHI_Gd29798	KX756027
UNH_RHHI_Gd29835	KX756028
UNH_RHMI_Gd29895	KX756029
UNH_RHPU_Gd20779	KX756030
UNH_RHPU_Gd20780	KX756031
UNH_ROAE_Gd29943	KX756036
UNH_ROAE_Gd29944	KX756037
USFS_MYSE_G0090	KX755985
USFS_MYSE_G0092	KX755984
